# Supplementary material for: Allele specific expression analysis identifies regulatory variation associated with stress-related genes in the Mexican highland maize landrace Palomero Toluqueño
Source: PeerJ. 2017 Aug 23;5:e3737. doi: 10.7717/peerj.3737 (PMC5572453; doi:10.7717/peerj.3737)
Supplement: Supplemental Information S2 [file peerj-05-3737-s002.xlsx]

## Sheet: legend
Supplementary Data 2
List of 39469 AGPv3.22 longest transcripts (next sheet)
tr	AGPv3.22 longest transcript id
locus	AGPv3.22 locus id
chr	chromosome
start	locus start coordinate
stop	locus stop coordinate
B73	effective counts for the B73 allele
PT	effective counts for the PT allele
ratio	PT/B73 effective counts ratio
log2_fc	log2-transformed ratio
chi_sq	Chi-squared test for the effective counts
p_value	Chi-squared test p-value
fdr	Benjamini & Hochberg-adjusted p-value
bon	Bonferroni-adjusted p-value
holm	Holm-adjusted p-value
ASE	Allele Specific Expression. 1: gene presents ASE; 0: gene does not present ASE
ASE_call	Allele Specific Expression call. 1: PT allele expression bias. -1: B73 allele expression bias
sequence_variant	Transcript sequence variant. seq_var: PT pseudo-transcript has sequence variant relative to B73 AGPv3.22 sequence
stress	Called as stress-responsive in B73 in Makarevitch et al., 2015. up: upregulated under stress; down: downregulated; on: up and not expressed in control; off: down and not expressed under stress

## Sheet: F1_counts
tr	locus	chr	start	stop	B73	PT	ratio	log2_fc	chi_sq	p_value	fdr	bon	holm	ASE	ASE_call	sequence_variant	stress
AC148152.3_FGT008	AC148152.3_FG008	2	231879065	231883597	3668.38	1820.27	0.496206	-1.01099	622.286	2.37977e-137	2.36414e-136	2.16083e-133	1.94355e-133	1	-1	seq_var	salt_up; uv_down
AC152495.1_FGT002	AC152495.1_FG002	10	3283523	3287419	1440.49	494.522	0.343301	-1.54245	462.456	1.40411e-102	1.08505e-101	1.27493e-98	1.11009e-98	1	-1	seq_var
AC182838.3_FGT006	AC182838.3_FG006	3	190568353	190568724	71.5359	9.70729	0.135698	-2.88153	47.0535	6.90739e-12	1.37966e-11	6.27191e-08	3.1325e-08	1	-1	seq_var
AC183319.3_FGT001	AC183319.3_FG001	3	37159450	37160239	516.682	132.71	0.256851	-1.961	227.034	2.64382e-51	1.13342e-50	2.40059e-47	1.84089e-47	1	-1	seq_var
AC185226.4_FGT001	AC185226.4_FG001	4	162608157	162617862	942.692	0.000944	1.00139e-06	-19.9296	942.689	5.15234e-207	8.16462e-206	4.67833e-203	4.38361e-203	1	-1	seq_var
AC194970.5_FGT004	AC194970.5_FG004	2	208015585	208027031	365.614	131.389	0.359365	-1.47648	110.384	8.07152e-26	2.30978e-25	7.32894e-22	4.76865e-22	1	-1	seq_var
AC196059.3_FGT003	AC196059.3_FG003	9	150978196	150980820	520.245	85.9267	0.165166	-2.59801	311.186	1.2044e-69	6.45571e-69	1.0936e-65	8.89692e-66	1	-1	seq_var
AC196475.3_FGT005	AC196475.3_FG005	4	32272270	32275424	1708.42	210.479	0.123201	-3.02092	1169.33	2.82415e-256	5.78854e-255	2.56432e-252	2.4395e-252	1	-1	seq_var	cold_up
AC199782.5_FGT001	AC199782.5_FG001	2	195041622	195045586	754.014	288.842	0.383073	-1.38431	207.492	4.84136e-47	1.96423e-46	4.39595e-43	3.31294e-43	1	-1	seq_var
AC204212.4_FGT001	AC204212.4_FG001	5	201176614	201176904	3297.6	983.642	0.29829	-1.74521	1250.67	5.94597e-274	1.34637e-272	5.39894e-270	5.1611e-270	1	-1	seq_var
AC205608.4_FGT004	AC205608.4_FG004	2	211193697	211195702	8261.63	2542.21	0.307713	-1.70034	3027.79	0	0	0	0	1	-1	seq_var
AC206968.3_FGT003	AC206968.3_FG003	2	46974105	46975385	1660.38	579.744	0.349164	-1.51802	521.298	2.20859e-115	1.90266e-114	2.0054e-111	1.77284e-111	1	-1	seq_var
AC207342.3_FGT008	AC207342.3_FG008	8	135947435	135949485	1982.86	642.936	0.324247	-1.62484	683.752	1.0207e-150	1.12886e-149	9.26792e-147	8.43095e-147	1	-1	seq_var	cold_up
AC207628.4_FGT009	AC207628.4_FG009	3	202899045	202905461	5777.16	1537.79	0.266184	-1.9095	2456.92	0	0	0	0	1	-1	seq_var
AC208897.3_FGT004	AC208897.3_FG004	1	27122677	27128168	1404.7	566.135	0.403028	-1.31105	356.801	1.40046e-79	8.41574e-79	1.27162e-75	1.06015e-75	1	-1	seq_var	uv_up
AC210003.2_FGT015	AC210003.2_FG015	2	4198770	4199116	321.18	78.544	0.244548	-2.03181	147.282	6.80918e-34	2.245e-33	6.18274e-30	4.30817e-30	1	-1	seq_var
AC211737.3_FGT012	AC211737.3_FG012	5	193210576	193218287	1679.42	131.591	0.0783549	-3.67383	1322.89	1.19702e-289	2.89839e-288	1.0869e-285	1.04213e-285	1	-1	seq_var	cold_up
AC212332.2_FGT003	AC212332.2_FG003	4	204001654	204007008	27.1042	1.95549	0.0721474	-3.79291	21.764	3.08326e-06	4.9133e-06	0.027996	0.0104307	1	-1	seq_var
AC213612.3_FGT001	AC213612.3_FG001	9	44505552	44506202	108.932	9.14035	0.0839085	-3.57504	84.3416	4.16255e-20	1.05076e-19	3.7796e-16	2.28274e-16	1	-1	seq_var
AC213884.3_FGT001	AC213884.3_FG001	6	140654815	140658705	579.951	129.933	0.224041	-2.15817	285.281	5.30579e-64	2.67202e-63	4.81765e-60	3.86155e-60	1	-1	seq_var	salt_up
AC214507.3_FGT001	AC214507.3_FG001	10	125952699	125954050	292.64	70.7711	0.241837	-2.04789	135.455	2.62589e-31	8.2731e-31	2.38431e-27	1.62779e-27	1	-1	seq_var
AC217358.3_FGT010	AC217358.3_FG010	1	297065040	297071542	1851.3	844.513	0.456173	-1.13235	375.997	9.25516e-84	5.92226e-83	8.40369e-80	7.09131e-80	1	-1	seq_var
AC218998.2_FGT007	AC218998.2_FG007	4	6074772	6078633	1465.09	193.216	0.13188	-2.92271	975.494	3.81067e-214	6.26828e-213	3.46009e-210	3.25012e-210	1	-1	seq_var
AC226373.2_FGT010	AC226373.2_FG010	6	156609807	156613859	1520.51	215.408	0.141668	-2.81941	981.204	2.18707e-215	3.61723e-214	1.98586e-211	1.86601e-211	1	-1	seq_var
AC231745.1_FGT004	AC231745.1_FG004	9	18244858	18253253	1239.54	485.36	0.391564	-1.35268	329.753	1.08775e-73	6.16527e-73	9.87676e-70	8.13527e-70	1	-1	seq_var
AC232289.2_FGT009	AC232289.2_FG009	3	8628447	8628884	56.8025	0	0	-Inf	56.8025	4.81854e-14	1.03458e-13	4.37524e-10	2.33796e-10	1	-1	seq_var
AC233895.1_FGT001	AC233895.1_FG001	6	140596596	140599178	1183.37	425.448	0.359523	-1.47584	357.059	1.23006e-79	7.39664e-79	1.11689e-75	9.31277e-76	1	-1	seq_var
AC233910.1_FGT008	AC233910.1_FG008	2	198426511	198427887	403.052	135.847	0.337047	-1.56898	132.489	1.16957e-30	3.65567e-30	1.06197e-26	7.22329e-27	1	-1	seq_var
AC233979.1_FGT006	AC233979.1_FG006	10	135080593	135082825	419.95	26.4153	0.0629009	-3.99077	346.957	1.94853e-77	1.14368e-76	1.76927e-73	1.46802e-73	1	-1	seq_var
AC234155.1_FGT002	AC234155.1_FG002	8	119108477	119111419	396.485	176.9	0.446171	-1.16433	84.0926	4.72131e-20	1.19082e-19	4.28694e-16	2.58775e-16	1	-1	seq_var
AC234165.1_FGT002	AC234165.1_FG002	3	164036105	164037526	4162.49	1744.69	0.419145	-1.25448	989.607	3.26076e-217	5.46268e-216	2.96077e-213	2.78436e-213	1	-1	seq_var
AC234528.1_FGT001	AC234528.1_FG001	1	204265288	204279896	227.906	68.2875	0.29963	-1.73875	86.0186	1.78251e-20	4.54895e-20	1.61852e-16	9.84479e-17	1	-1	seq_var
GRMZM2G000219_T01	GRMZM2G000219	9	120503782	120505559	6851.37	2038.72	0.297563	-1.74873	2605.33	0	0	0	0	1	-1	seq_var
GRMZM2G000393_T02	GRMZM2G000393	9	14548134	14553095	470.278	0	0	-Inf	470.278	2.78805e-104	2.18803e-103	2.53155e-100	2.20925e-100	1	-1	seq_var
GRMZM2G000622_T01	GRMZM2G000622	1	268624221	268630527	3770	1368.5	0.362998	-1.46197	1122.35	4.5864e-246	8.86054e-245	4.16445e-242	3.94935e-242	1	-1	seq_var	cold_up
GRMZM2G000623_T02	GRMZM2G000623	9	1599022	1610027	835.506	0	0	-Inf	835.506	1.02946e-183	1.40143e-182	9.34753e-180	8.6619e-180	1	-1	seq_var
GRMZM2G000719_T01	GRMZM2G000719	8	148325646	148330629	541.283	7.48824	0.0138343	-6.17561	519.227	6.23485e-115	5.35089e-114	5.66124e-111	5.00222e-111	1	-1	seq_var
GRMZM2G000739_T02	GRMZM2G000739	8	145440728	145444574	3340.68	260.53	0.0779869	-3.68062	2634.49	0	0	0	0	1	-1	seq_var	cold_up; salt_up; uv_up
GRMZM2G000752_T01	GRMZM2G000752	1	246939813	246941840	128.594	33.9995	0.264393	-1.91924	55.034	1.18463e-13	2.50849e-13	1.07564e-09	5.67792e-10	1	-1	seq_var	cold_on; salt_on
GRMZM2G001084_T01	GRMZM2G001084	2	64406192	64419933	3961.98	1895.29	0.478371	-1.0638	729.209	1.33077e-160	1.59201e-159	1.20833e-156	1.10746e-156	1	-1	seq_var
GRMZM2G001296_T01	GRMZM2G001296	3	225283647	225291388	1300.2	433.956	0.333761	-1.58311	432.704	4.19125e-96	3.0666e-95	3.80565e-92	3.28594e-92	1	-1	seq_var
GRMZM2G001639_T01	GRMZM2G001639	7	141630967	141633481	2368.57	1000.62	0.422458	-1.24312	555.411	8.372e-123	7.72538e-122	7.60178e-119	6.77881e-119	1	-1	seq_var
GRMZM2G001653_T01	GRMZM2G001653	2	56736412	56737906	146017	44170.9	0.302504	-1.72497	54539.2	0	0	0	0	1	-1	seq_var
GRMZM2G001668_T01	GRMZM2G001668	2	170363991	170373719	4664.56	1705.09	0.365542	-1.45189	1375.03	5.61276e-301	1.42357e-299	5.09639e-297	4.89601e-297	1	-1	seq_var
GRMZM2G001889_T01	GRMZM2G001889	5	109766717	109769287	95.3229	0	0	-Inf	95.3229	1.61731e-22	4.31536e-22	1.46852e-18	9.18308e-19	1	-1	seq_var	cold_on; heat_on
GRMZM2G002616_T01	GRMZM2G002616	3	132487154	132491827	529.012	162.656	0.307472	-1.70147	194.048	4.15804e-44	1.61692e-43	3.7755e-40	2.80501e-40	1	-1	seq_var
GRMZM2G002642_T02	GRMZM2G002642	2	27008092	27014594	2365.13	625.866	0.264622	-1.918	1011.38	6.02403e-222	1.04187e-220	5.46982e-218	5.15416e-218	1	-1	seq_var
GRMZM2G003179_T01	GRMZM2G003179	7	121444681	121445481	330.752	85.5505	0.258654	-1.9509	144.424	2.87076e-33	9.3529e-33	2.60665e-29	1.80686e-29	1	-1	seq_var	cold_up; salt_down
GRMZM2G003426_T01	GRMZM2G003426	1	218852737	218853569	1788.17	743.642	0.415867	-1.2658	430.933	1.01816e-95	7.44356e-95	9.2449e-92	7.98136e-92	1	-1	seq_var
GRMZM2G003501_T01	GRMZM2G003501	4	166858871	166860792	391.451	69.0963	0.176513	-2.50215	225.628	5.35509e-51	2.2882e-50	4.86242e-47	3.725e-47	1	-1	seq_var
GRMZM2G003595_T02	GRMZM2G003595	1	165959409	165981583	498.997	208.651	0.418142	-1.25794	119.128	9.81974e-28	2.90056e-27	8.91632e-24	5.89872e-24	1	-1	seq_var
GRMZM2G003607_T01	GRMZM2G003607	1	256345800	256352614	1315.3	629.425	0.478541	-1.06329	241.898	1.51655e-54	6.81358e-54	1.37702e-50	1.07068e-50	1	-1	seq_var
GRMZM2G003625_T01	GRMZM2G003625	10	3849433	3854134	11632.7	2097	0.180268	-2.47178	6622.8	0	0	0	0	1	-1	seq_var
GRMZM2G003662_T01	GRMZM2G003662	4	27443539	27447075	580.578	97.1861	0.167395	-2.57867	344.763	5.85711e-77	3.42671e-76	5.31825e-73	4.40981e-73	1	-1	seq_var
GRMZM2G003663_T01	GRMZM2G003663	4	223648055	223650977	584.098	237.856	0.40722	-1.29612	145.852	1.39889e-33	4.58057e-33	1.27019e-29	8.82419e-30	1	-1	seq_var
GRMZM2G003711_T01	GRMZM2G003711	7	51811691	51812204	484.127	91.6192	0.189246	-2.40167	267.588	3.80765e-60	1.82928e-59	3.45735e-56	2.73808e-56	1	-1	seq_var
GRMZM2G003732_T01	GRMZM2G003732	10	4641206	4667439	842.954	264.23	0.313457	-1.67366	302.499	9.40333e-68	4.9411e-67	8.53823e-64	6.91427e-64	1	-1	seq_var
GRMZM2G004040_T01	GRMZM2G004040	8	144019441	144028207	4549.3	125.682	0.0276266	-5.1778	4185.77	0	0	0	0	1	-1	seq_var
GRMZM2G004172_T01	GRMZM2G004172	9	149541110	149544567	3081.65	1136.47	0.368786	-1.43914	897.018	4.36584e-197	6.48802e-196	3.96418e-193	3.69786e-193	1	-1	seq_var
GRMZM2G004183_T01	GRMZM2G004183	3	213687451	213689589	625.571	282.442	0.451495	-1.14722	129.665	4.85142e-30	1.49274e-29	4.40509e-26	2.97392e-26	1	-1	seq_var
GRMZM2G004278_T01	GRMZM2G004278	6	77839961	77841972	645.662	100.519	0.155683	-2.68332	398.271	1.31044e-88	8.85985e-88	1.18988e-84	1.01402e-84	1	-1	seq_var	cold_up; heat_off; uv_off
GRMZM2G004290_T01	GRMZM2G004290	5	4204195	4205740	433.752	131.971	0.304255	-1.71665	160.983	6.90038e-37	2.37602e-36	6.26555e-33	4.4473e-33	1	-1	seq_var
GRMZM2G004888_T01	GRMZM2G004888	6	160211379	160217994	726.634	33.5873	0.0462232	-4.43524	631.807	2.02168e-139	2.04647e-138	1.83568e-135	1.65454e-135	1	-1	seq_var
GRMZM2G004997_T02	GRMZM2G004997	4	26320085	26324458	6313.05	446.392	0.0707094	-3.82195	5091.8	0	0	0	0	1	-1	seq_var
GRMZM2G005146_T01	GRMZM2G005146	2	184401793	184403738	4027.98	820.341	0.20366	-2.29576	2122.17	0	0	0	0	1	-1	seq_var
GRMZM2G005433_T01	GRMZM2G005433	8	158930788	158932239	4521	1063.26	0.235181	-2.08815	2141.02	0	0	0	0	1	-1	seq_var
GRMZM2G005493_T01	GRMZM2G005493	2	216322527	216327171	1243.18	417.266	0.335645	-1.57499	410.812	2.43981e-91	1.69628e-90	2.21535e-87	1.89695e-87	1	-1	seq_var	salt_up
GRMZM2G005562_T04	GRMZM2G005562	5	82585790	82588634	5357.69	2511.46	0.468757	-1.09309	1029.47	7.0564e-226	1.24654e-224	6.40721e-222	6.04522e-222	1	-1	seq_var	heat_up; salt_up
GRMZM2G005732_T02	GRMZM2G005732	7	174996931	175030459	2127.66	815.497	0.383283	-1.38352	585.011	3.04898e-129	2.93893e-128	2.76847e-125	2.48157e-125	1	-1	seq_var
GRMZM2G005954_T01	GRMZM2G005954	2	184649167	184651569	1693.43	740.695	0.437394	-1.193	372.907	4.3583e-83	2.76158e-82	3.95734e-79	3.33323e-79	1	-1	seq_var	salt_up
GRMZM2G005984_T01	GRMZM2G005984	9	131824676	131825626	9939.44	3578.97	0.360078	-1.47362	2992.63	0	0	0	0	1	-1	seq_var
GRMZM2G006468_T05	GRMZM2G006468	4	59674528	59678827	12227.1	4224.46	0.3455	-1.53324	3892.78	0	0	0	0	1	-1	seq_var
GRMZM2G006953_T01	GRMZM2G006953	4	44887427	44888397	2778.79	1260.52	0.45362	-1.14044	570.682	3.98964e-126	3.77747e-125	3.6226e-122	3.24039e-122	1	-1	seq_var
GRMZM2G007025_T01	GRMZM2G007025	1	2871385	2874062	280.806	119.321	0.424924	-1.23472	65.1724	6.86223e-16	1.55462e-15	6.23091e-12	3.48121e-12	1	-1	seq_var	salt_up
GRMZM2G007038_T02	GRMZM2G007038	6	141876885	141881260	23998.4	7534.11	0.313942	-1.67143	8596.65	0	0	0	0	1	-1	seq_var
GRMZM2G007249_T01	GRMZM2G007249	7	124313854	124315851	2746.27	229.414	0.0835366	-3.58145	2128.78	0	0	0	0	1	-1	seq_var
GRMZM2G007283_T02	GRMZM2G007283	2	151335183	151340142	929.329	130.178	0.140078	-2.8357	602.773	4.17597e-133	4.08598e-132	3.79178e-129	3.40467e-129	1	-1	seq_var
GRMZM2G007339_T01	GRMZM2G007339	3	206492406	206496408	844.671	367.35	0.434903	-1.20124	187.98	8.77587e-43	3.3481e-42	7.96849e-39	5.88071e-39	1	-1	seq_var
GRMZM2G007372_T01	GRMZM2G007372	5	84876427	84879655	2181.85	1062.44	0.486944	-1.03817	386.242	5.44481e-86	3.56702e-85	4.94389e-82	4.18978e-82	1	-1	seq_var
GRMZM2G007587_T02	GRMZM2G007587	4	36548916	36551039	649.433	240.964	0.371038	-1.43036	187.385	1.18365e-42	4.50252e-42	1.07475e-38	7.92333e-39	1	-1	seq_var
GRMZM2G007734_T01	GRMZM2G007734	4	28948062	28952113	593.933	214.887	0.361803	-1.46672	177.637	1.59008e-40	5.8406e-40	1.4438e-36	1.05089e-36	1	-1	seq_var
GRMZM2G007848_T01	GRMZM2G007848	8	148567350	148573657	2727.66	770.749	0.282568	-1.82333	1094.64	4.82955e-240	9.098e-239	4.38523e-236	4.15293e-236	1	-1	seq_var
GRMZM2G008226_T01	GRMZM2G008226	1	218618199	218623790	2443.7	1126.3	0.4609	-1.11748	486.145	9.83042e-108	7.94837e-107	8.92602e-104	7.82305e-104	1	-1	seq_var
GRMZM2G008247_T01	GRMZM2G008247	10	37762909	37767709	23056.7	7018.97	0.304422	-1.71586	8552.08	0	0	0	0	1	-1	seq_var
GRMZM2G008273_T01	GRMZM2G008273	4	37136807	37143424	934.597	259.152	0.277288	-1.85054	382.179	4.17502e-85	2.70974e-84	3.79092e-81	3.20725e-81	1	-1	seq_var
GRMZM2G008353_T01	GRMZM2G008353	6	112098026	112099381	1316.55	203.916	0.154887	-2.69071	814.193	4.4288e-179	5.88778e-178	4.02135e-175	3.71931e-175	1	-1	seq_var
GRMZM2G008919_T01	GRMZM2G008919	2	233041651	233044942	1134.95	513.893	0.452789	-1.14309	233.929	8.28994e-53	3.63285e-52	7.52727e-49	5.81042e-49	1	-1	seq_var
GRMZM2G009048_T01	GRMZM2G009048	10	16377558	16378557	10726.6	3998.08	0.372725	-1.42382	3074.65	0	0	0	0	1	-1	seq_var
GRMZM2G009060_T01	GRMZM2G009060	1	52392455	52394837	757.596	112.642	0.148684	-2.74968	477.989	5.8511e-106	4.66445e-105	5.3128e-102	4.64695e-102	1	-1	seq_var
GRMZM2G009335_T03	GRMZM2G009335	9	83288941	83290942	18342.2	6440.48	0.351128	-1.50993	5715.75	0	0	0	0	1	-1	seq_var
GRMZM2G010163_T02	GRMZM2G010163	4	240794929	240797994	76.5667	14.0813	0.183908	-2.44294	43.0724	5.275e-11	1.02366e-10	4.7897e-07	2.32205e-07	1	-1	seq_var	heat_up; salt_on
GRMZM2G010323_T04	GRMZM2G010323	10	117919173	117923409	847.308	233.616	0.275715	-1.85875	348.422	9.34739e-78	5.51132e-77	8.48743e-74	7.04886e-74	1	-1	seq_var
GRMZM2G010348_T02	GRMZM2G010348	8	102835689	102837247	407.358	159.218	0.390856	-1.35529	108.676	1.91117e-25	5.42294e-25	1.73534e-21	1.12396e-21	1	-1	seq_var
GRMZM2G010357_T01	GRMZM2G010357	6	155324245	155332632	1038.34	99.1689	0.0955075	-3.38824	775.413	1.19652e-170	1.5259e-169	1.08644e-166	1.00137e-166	1	-1	seq_var
GRMZM2G010362_T01	GRMZM2G010362	1	231541845	231575348	1067.93	279.617	0.26183	-1.9333	461.164	2.68279e-102	2.06613e-101	2.43597e-98	2.11994e-98	1	-1	seq_var
GRMZM2G010490_T01	GRMZM2G010490	9	152086311	152089916	2322.41	853.83	0.367648	-1.4436	679.022	1.09045e-149	1.19437e-148	9.9013e-146	8.99841e-146	1	-1	seq_var	heat_up; uv_down
GRMZM2G010491_T02	GRMZM2G010491	4	174019150	174020537	6220.42	1356.28	0.218037	-2.19735	3122.71	0	0	0	0	1	-1	seq_var
GRMZM2G010637_T01	GRMZM2G010637	9	38293369	38312734	3039.35	1368.12	0.450135	-1.15157	633.701	7.83119e-140	7.99856e-139	7.11072e-136	6.41531e-136	1	-1	seq_var
GRMZM2G010649_T01	GRMZM2G010649	9	25603230	25605160	458.471	218.822	0.477287	-1.06707	84.7958	3.30829e-20	8.36981e-20	3.00393e-16	1.81691e-16	1	-1	seq_var
GRMZM2G010765_T01	GRMZM2G010765	2	78408001	78412510	1453.2	342.109	0.235417	-2.08671	687.639	1.45821e-151	1.6246e-150	1.32405e-147	1.20535e-147	1	-1	seq_var	cold_up; uv_up
GRMZM2G010920_T01	GRMZM2G010920	5	77781452	77784526	1055.16	304.677	0.288749	-1.79211	414.186	4.49637e-92	3.15024e-91	4.08271e-88	3.50043e-88	1	-1	seq_var	heat_up; uv_down
GRMZM2G011078_T02	GRMZM2G011078	1	246465484	246469206	503.522	0	0	-Inf	503.522	1.62784e-111	1.36103e-110	1.47808e-107	1.30146e-107	1	-1	seq_var
GRMZM2G011590_T02	GRMZM2G011590	10	148821535	148829544	1098.66	485.667	0.442053	-1.17771	237.175	1.62405e-53	7.18632e-53	1.47463e-49	1.14154e-49	1	-1	seq_var	cold_on
GRMZM2G011631_T01	GRMZM2G011631	5	164380304	164401827	328.885	55.2792	0.168081	-2.57277	194.865	2.75737e-44	1.07501e-43	2.50369e-40	1.86178e-40	1	-1	seq_var
GRMZM2G011636_T01	GRMZM2G011636	3	1672406	1677301	586.507	200.206	0.341354	-1.55066	189.686	3.72317e-43	1.42824e-42	3.38063e-39	2.49973e-39	1	-1	seq_var
GRMZM2G011980_T01	GRMZM2G011980	3	230774085	230778420	1017.46	259.834	0.255376	-1.9693	449.382	9.83292e-100	7.41553e-99	8.92829e-96	7.74539e-96	1	-1	seq_var
GRMZM2G012031_T01	GRMZM2G012031	7	5113135	5132924	1478.51	650.889	0.440233	-1.18366	321.668	6.2752e-72	3.48281e-71	5.69788e-68	4.67189e-68	1	-1	seq_var
GRMZM2G012178_T01	GRMZM2G012178	5	209617281	209621152	245.005	68.3737	0.279071	-1.8413	99.5556	1.90735e-23	5.20237e-23	1.73187e-19	1.09711e-19	1	-1	seq_var
GRMZM2G012546_T01	GRMZM2G012546	2	234774731	234776028	693.32	283.277	0.408581	-1.29131	172.164	2.49169e-39	8.98512e-39	2.26245e-35	1.6353e-35	1	-1	seq_var
GRMZM2G012717_T01	GRMZM2G012717	6	117553493	117555386	697.197	231.593	0.332178	-1.58997	233.407	1.07711e-52	4.71105e-52	9.78015e-49	7.54515e-49	1	-1	seq_var
GRMZM2G012865_T02	GRMZM2G012865	5	96603392	96605119	1095.1	454.725	0.415235	-1.268	264.6	1.70563e-59	8.12548e-59	1.54872e-55	1.22379e-55	1	-1	seq_var
GRMZM2G012958_T01	GRMZM2G012958	5	39916762	39922653	575.244	275.754	0.479368	-1.06079	105.399	9.98434e-25	2.79463e-24	9.06578e-21	5.82786e-21	1	-1	seq_var
GRMZM2G013170_T01	GRMZM2G013170	4	1940774	1946421	1925.68	904.777	0.469848	-1.08973	368.223	4.56073e-82	2.85596e-81	4.14114e-78	3.48029e-78	1	-1	seq_var	salt_up; uv_down
GRMZM2G013248_T01	GRMZM2G013248	1	284876539	284877186	544.684	39.4527	0.0724323	-3.78722	436.985	4.9054e-97	3.62417e-96	4.4541e-93	3.85172e-93	1	-1	seq_var	cold_up; heat_off
GRMZM2G013255_T01	GRMZM2G013255	7	140931084	140933160	644.362	118.691	0.1842	-2.44066	362.137	9.64423e-81	5.92086e-80	8.75696e-77	7.33154e-77	1	-1	seq_var
GRMZM2G013581_T01	GRMZM2G013581	6	34825413	34826773	396.126	65.5988	0.165601	-2.59422	236.609	2.15879e-53	9.53397e-53	1.96018e-49	1.51655e-49	1	-1	seq_var
GRMZM2G013936_T02	GRMZM2G013936	2	156515340	156538700	480.629	148.521	0.309013	-1.69426	175.309	5.12478e-40	1.8718e-39	4.6533e-36	3.3798e-36	1	-1	seq_var
GRMZM2G014055_T01	GRMZM2G014055	6	14195929	14197087	8554.88	67.1278	0.00784672	-6.99369	8355.59	0	0	0	0	1	-1	seq_var
GRMZM2G014341_T04	GRMZM2G014341	2	192313252	192316229	566.412	178.136	0.314499	-1.66887	202.483	5.99835e-46	2.40145e-45	5.4465e-42	4.08667e-42	1	-1	seq_var
GRMZM2G014695_T03	GRMZM2G014695	2	63006821	63009217	18082.1	8663.33	0.479111	-1.06157	3316.95	0	0	0	0	1	-1	seq_var
GRMZM2G014720_T01	GRMZM2G014720	3	182952380	182955812	814.314	284.641	0.349547	-1.51644	255.291	1.8236e-57	8.49145e-57	1.65583e-53	1.30041e-53	1	-1	seq_var
GRMZM2G014805_T01	GRMZM2G014805	3	106351200	106368030	3228.99	1368.04	0.423675	-1.23897	753.34	7.53786e-166	9.29942e-165	6.84438e-162	6.29034e-162	1	-1	seq_var
GRMZM2G014914_T01	GRMZM2G014914	7	41435006	41438812	5118.22	2412.06	0.47127	-1.08537	972.508	1.69856e-213	2.78392e-212	1.54229e-209	1.44836e-209	1	-1	seq_var	cold_down; salt_up
GRMZM2G015419_T02	GRMZM2G015419	4	234164922	234168659	53648.6	26195.8	0.488285	-1.0342	9439.05	0	0	0	0	1	-1	seq_var
GRMZM2G015818_T01	GRMZM2G015818	3	8346913	8348088	71.8769	0	0	-Inf	71.8769	2.29051e-17	5.40765e-17	2.07978e-13	1.19908e-13	1	-1	seq_var
GRMZM2G016088_T01	GRMZM2G016088	1	189804901	189806671	2677.04	764.778	0.285681	-1.80752	1062.44	4.80487e-233	8.79601e-232	4.36282e-229	4.12498e-229	1	-1	seq_var
GRMZM2G016290_T02	GRMZM2G016290	1	297830512	297832329	507.826	187.801	0.369814	-1.43513	147.228	6.99585e-34	2.30571e-33	6.35224e-30	4.42558e-30	1	-1	seq_var	cold_down; heat_up; uv_up
GRMZM2G016457_T01	GRMZM2G016457	3	106399923	106427976	4948.84	751.553	0.151865	-2.71914	3090.53	0	0	0	0	1	-1	seq_var
GRMZM2G016511_T01	GRMZM2G016511	1	16602780	16605847	1233.28	552.305	0.447835	-1.15896	259.705	1.99014e-58	9.34356e-58	1.80705e-54	1.42235e-54	1	-1	seq_var
GRMZM2G016602_T04	GRMZM2G016602	1	252202771	252214106	439.918	149.375	0.339552	-1.55829	143.248	5.18832e-33	1.6837e-32	4.711e-29	3.25982e-29	1	-1	seq_var
GRMZM2G016756_T01	GRMZM2G016756	5	5102185	5106027	1110.49	450.171	0.405379	-1.30266	279.384	1.02283e-62	5.07781e-62	9.28732e-59	7.41758e-59	1	-1	seq_var
GRMZM2G017186_T03	GRMZM2G017186	1	276389788	276395192	2607.51	509.328	0.195331	-2.35601	1412.45	0	1.08671e-307	3.76e-305	3.61714e-305	1	-1	seq_var	cold_up
GRMZM2G017266_T01	GRMZM2G017266	7	166593474	166596349	229.948	18.9132	0.08225	-3.60384	178.958	8.18311e-41	3.0192e-40	7.43026e-37	5.41722e-37	1	-1	seq_var
GRMZM2G017319_T01	GRMZM2G017319	1	255383520	255385569	1307.01	499.296	0.382015	-1.3883	361.177	1.56067e-80	9.49794e-80	1.41709e-76	1.1844e-76	1	-1	seq_var
GRMZM2G017419_T01	GRMZM2G017419	10	89936005	89938072	43470.7	19951.4	0.458962	-1.12355	8721.85	0	0	0	0	1	-1	seq_var
GRMZM2G017671_T02	GRMZM2G017671	6	47690988	47694861	564.133	231.859	0.411001	-1.28278	138.702	5.11769e-32	1.63162e-31	4.64686e-28	3.18986e-28	1	-1	seq_var
GRMZM2G018027_T01	GRMZM2G018027	10	134741566	134743313	1469.25	677.222	0.460929	-1.11738	292.253	1.60562e-65	8.2043e-65	1.4579e-61	1.17275e-61	1	-1	seq_var	heat_up; salt_down
GRMZM2G018070_T01	GRMZM2G018070	2	189550238	189551365	569.037	258.767	0.454745	-1.13687	116.293	4.10047e-27	1.19872e-26	3.72323e-23	2.45003e-23	1	-1	seq_var	salt_up; uv_up
GRMZM2G018080_T01	GRMZM2G018080	1	11692597	11694219	389.54	191.982	0.492842	-1.0208	67.1157	2.56033e-16	5.86474e-16	2.32478e-12	1.31012e-12	1	-1	seq_var
GRMZM2G018251_T01	GRMZM2G018251	4	240584583	240588730	876.886	53.4346	0.0609368	-4.03654	728.858	1.58648e-160	1.89542e-159	1.44052e-156	1.32011e-156	1	-1	seq_var
GRMZM2G018281_T03	GRMZM2G018281	10	127269125	127274514	815.305	339.03	0.415832	-1.26593	196.51	1.2063e-44	4.7314e-44	1.09532e-40	8.16182e-41	1	-1	seq_var	heat_up
GRMZM2G019051_T01	GRMZM2G019051	9	32534720	32537232	717.138	173.301	0.241657	-2.04897	332.149	3.27164e-74	1.86248e-73	2.97065e-70	2.44915e-70	1	-1	seq_var
GRMZM2G019106_T01	GRMZM2G019106	4	239534487	239538429	907.251	359.618	0.396382	-1.33504	236.727	2.03411e-53	8.98771e-53	1.84698e-49	1.42917e-49	1	-1	seq_var
GRMZM2G019236_T01	GRMZM2G019236	4	19446270	19462088	2572.63	944.932	0.367302	-1.44496	753.19	8.12491e-166	1.00101e-164	7.37742e-162	6.77943e-162	1	-1	seq_var
GRMZM2G019246_T01	GRMZM2G019246	10	99220249	99222839	3811.31	1734.07	0.45498	-1.13612	778.111	3.0985e-171	3.96818e-170	2.81344e-167	2.59407e-167	1	-1	seq_var
GRMZM2G019267_T02	GRMZM2G019267	1	271027566	271032041	2415.79	1144.5	0.473758	-1.07778	453.947	9.98231e-101	7.59124e-100	9.06394e-97	7.87305e-97	1	-1	seq_var
GRMZM2G019317_T02	GRMZM2G019317	5	204644182	204648555	1395.47	357.782	0.256389	-1.96359	614.167	1.38826e-135	1.37314e-134	1.26054e-131	1.13324e-131	1	-1	seq_var
GRMZM2G019325_T01	GRMZM2G019325	10	141493143	141495837	631.419	265.102	0.419851	-1.25205	149.677	2.04007e-34	6.77537e-34	1.85239e-30	1.29484e-30	1	-1	seq_var
GRMZM2G019695_T01	GRMZM2G019695	5	816728	819972	6823.05	1115.79	0.163533	-2.61235	4102.96	0	0	0	0	1	-1	seq_var
GRMZM2G019721_T01	GRMZM2G019721	3	41457022	41460730	359.893	65.3375	0.181547	-2.46158	204.037	2.74728e-46	1.10426e-45	2.49453e-42	1.87419e-42	1	-1	seq_var
GRMZM2G019746_T02	GRMZM2G019746	7	1958055	1960555	707.832	290.836	0.410882	-1.2832	174.118	9.32719e-40	3.39306e-39	8.46909e-36	6.14195e-36	1	-1	seq_var
GRMZM2G019919_T02	GRMZM2G019919	2	21882159	21886866	5218.8	1713.71	0.328373	-1.60659	1772.18	0	0	0	0	1	-1	seq_var
GRMZM2G019958_T04	GRMZM2G019958	5	8824864	8833179	2427.47	671.469	0.276612	-1.85406	995.034	2.15666e-218	3.64664e-217	1.95824e-214	1.84265e-214	1	-1	seq_var
GRMZM2G020148_T01	GRMZM2G020148	8	4432844	4434564	522.732	199.324	0.381313	-1.39095	144.853	2.31223e-33	7.54947e-33	2.09951e-29	1.45671e-29	1	-1	seq_var
GRMZM2G020150_T01	GRMZM2G020150	6	156591969	156593826	325.073	63.1712	0.194329	-2.36342	176.674	2.58054e-40	9.45575e-40	2.34313e-36	1.70393e-36	1	-1	seq_var	cold_up; uv_up
GRMZM2G020196_T01	GRMZM2G020196	4	229159456	229162354	659.148	0.004144	6.2869e-06	-17.2792	659.135	2.30332e-145	2.44039e-144	2.09142e-141	1.89425e-141	1	-1	seq_var
GRMZM2G020366_T01	GRMZM2G020366	5	69147384	69150733	668.824	200.361	0.299572	-1.73902	252.486	7.45509e-57	3.4449e-56	6.76922e-53	5.30504e-53	1	-1	seq_var
GRMZM2G020484_T06	GRMZM2G020484	8	13912826	13915979	701.82	183.734	0.261797	-1.93348	303.102	6.9497e-68	3.65816e-67	6.31033e-64	5.1122e-64	1	-1	seq_var	cold_up
GRMZM2G020553_T01	GRMZM2G020553	1	242113801	242116273	628.692	271.933	0.432538	-1.2091	141.321	1.36905e-32	4.41126e-32	1.24309e-28	8.57434e-29	1	-1	seq_var
GRMZM2G020556_T01	GRMZM2G020556	1	244220053	244222613	194.719	24.4016	0.125317	-2.99635	132.384	1.23317e-30	3.8518e-30	1.11972e-26	7.61358e-27	1	-1	seq_var
GRMZM2G020761_T01	GRMZM2G020761	9	127562919	127567385	850.803	144.692	0.170065	-2.55584	500.85	6.20888e-111	5.15326e-110	5.63766e-107	4.95903e-107	1	-1	seq_var	cold_down; salt_up; uv_off
GRMZM2G020920_T04	GRMZM2G020920	4	49111485	49155093	6057.39	1004.8	0.16588	-2.59179	3614.84	0	0	0	0	1	-1	seq_var
GRMZM2G020928_T02	GRMZM2G020928	6	164773159	164775972	2474.29	1001.78	0.404876	-1.30445	623.774	1.12948e-137	1.12452e-136	1.02556e-133	9.22669e-134	1	-1	seq_var
GRMZM2G021194_T01	GRMZM2G021194	3	227851107	227862209	1901.23	753.97	0.39657	-1.33435	495.709	8.15991e-110	6.70516e-109	7.4092e-106	6.50835e-106	1	-1	seq_var	cold_up; heat_down
GRMZM2G021225_T02	GRMZM2G021225	4	114349506	114355065	1009.9	120.827	0.119643	-3.0632	699.065	4.77625e-154	5.40753e-153	4.33684e-150	3.95426e-150	1	-1	seq_var
GRMZM2G021299_T01	GRMZM2G021299	2	155706921	155736767	4399.83	450.39	0.102365	-3.2882	3215.95	0	0	0	0	1	-1	seq_var
GRMZM2G021464_T02	GRMZM2G021464	2	46399662	46400732	75.4924	0	0	-Inf	75.4924	3.66821e-18	8.82548e-18	3.33074e-14	1.94672e-14	1	-1	seq_var
GRMZM2G021589_T01	GRMZM2G021589	3	186023825	186028557	775.037	267.889	0.345647	-1.53263	246.612	1.42225e-55	6.47318e-55	1.2914e-51	1.0078e-51	1	-1	seq_var
GRMZM2G021784_T01	GRMZM2G021784	6	366120	371803	6202.48	2859.43	0.461014	-1.11712	1233.29	3.55395e-270	7.90929e-269	3.22699e-266	3.08234e-266	1	-1	seq_var
GRMZM2G021822_T01	GRMZM2G021822	10	142600552	142604023	165.154	0	0	-Inf	165.154	8.46441e-38	2.9663e-37	7.68569e-34	5.4934e-34	1	-1	seq_var
GRMZM2G022032_T01	GRMZM2G022032	2	194479783	194483607	2931.68	1011.72	0.345098	-1.53492	934.794	2.68015e-205	4.1814e-204	2.43357e-201	2.27786e-201	1	-1	seq_var
GRMZM2G022052_T01	GRMZM2G022052	3	208704633	208708901	235.544	59.8862	0.254246	-1.9757	104.443	1.61775e-24	4.51141e-24	1.46892e-20	9.42339e-21	1	-1	seq_var
GRMZM2G022054_T02	GRMZM2G022054	5	755391	757776	567.26	118.228	0.20842	-2.26244	294.14	6.22941e-66	3.19385e-65	5.65631e-62	4.5537e-62	1	-1	seq_var
GRMZM2G022242_T01	GRMZM2G022242	2	208048560	208050345	1097.53	372.243	0.339165	-1.55994	357.905	8.04998e-80	4.85996e-79	7.30938e-76	6.09947e-76	1	-1	seq_var
GRMZM2G022563_T01	GRMZM2G022563	2	6038651	6046071	619.929	80.0777	0.129172	-2.95263	416.338	1.5294e-92	1.07818e-91	1.3887e-88	1.19186e-88	1	-1	seq_var
GRMZM2G022619_T02	GRMZM2G022619	6	164882426	164884568	347.58	163.852	0.471409	-1.08495	66.0026	4.50327e-16	1.02506e-15	4.08897e-12	2.29307e-12	1	-1	seq_var
GRMZM2G022926_T01	GRMZM2G022926	10	141459032	141461396	3226.9	1607.83	0.498259	-1.00503	542.199	6.26626e-120	5.68977e-119	5.68977e-116	5.06377e-116	1	-1	seq_var	salt_up; uv_down
GRMZM2G023232_T01	GRMZM2G023232	6	130528209	130534334	1195.9	441.608	0.369269	-1.43726	347.451	1.52108e-77	8.94523e-77	1.38114e-73	1.14644e-73	1	-1	seq_var	heat_up
GRMZM2G023347_T01	GRMZM2G023347	5	17340297	17343212	277.936	60.5048	0.217693	-2.19963	139.689	3.11324e-32	9.97114e-32	2.82682e-28	1.94453e-28	1	-1	seq_var
GRMZM2G023372_T01	GRMZM2G023372	1	252016458	252026920	926.876	444.153	0.479193	-1.06132	169.961	7.54431e-39	2.698e-38	6.85023e-35	4.93549e-35	1	-1	seq_var
GRMZM2G023575_T03	GRMZM2G023575	1	18127980	18133867	1378.99	82.2695	0.0596591	-4.06711	1150.71	3.14171e-252	6.33928e-251	2.85268e-248	2.71161e-248	1	-1	seq_var
GRMZM2G023625_T01	GRMZM2G023625	7	57642051	57653033	3673.88	642.687	0.174934	-2.51512	2128.58	0	0	0	0	1	-1	seq_var
GRMZM2G024104_T03	GRMZM2G024104	1	267960169	267963183	3807.57	1851.93	0.486381	-1.03984	675.773	5.54794e-149	6.05472e-148	5.03753e-145	4.57649e-145	1	-1	seq_var	cold_down; salt_up
GRMZM2G024647_T01	GRMZM2G024647	4	128321482	128323867	777.522	176.602	0.227134	-2.13838	378.467	2.68334e-84	1.72554e-83	2.43647e-80	2.05785e-80	1	-1	seq_var
GRMZM2G024933_T02	GRMZM2G024933	2	71740629	71768626	2984.45	762.971	0.255649	-1.96776	1316.89	2.41009e-288	5.78931e-287	2.18836e-284	2.0975e-284	1	-1	seq_var
GRMZM2G024976_T01	GRMZM2G024976	5	159240339	159247522	2002.74	547.932	0.273591	-1.86991	829.771	1.81731e-182	2.44824e-181	1.65012e-178	1.52781e-178	1	-1	seq_var
GRMZM2G025014_T02	GRMZM2G025014	2	233311662	233314199	1574.35	731.464	0.464615	-1.10589	308.113	5.62758e-69	2.99697e-68	5.10984e-65	4.1509e-65	1	-1	seq_var
GRMZM2G025231_T02	GRMZM2G025231	7	37037012	37042784	12095.9	1901.73	0.157221	-2.66913	7424.15	0	0	0	0	1	-1	seq_var
GRMZM2G025243_T02	GRMZM2G025243	10	141600894	141612028	1473.15	217.477	0.147627	-2.75997	932.619	7.96061e-205	1.23349e-203	7.22824e-201	6.76254e-201	1	-1	seq_var
GRMZM2G025477_T01	GRMZM2G025477	4	221299923	221301965	71.6089	3.59687	0.0502293	-4.31533	61.5064	4.41304e-15	9.78252e-15	4.00704e-11	2.1999e-11	1	-1	seq_var	cold_on
GRMZM2G025488_T01	GRMZM2G025488	1	205727961	205738069	1135.39	44.6282	0.0393067	-4.66908	1008.25	2.88771e-221	4.9754e-220	2.62204e-217	2.47014e-217	1	-1	seq_var
GRMZM2G025731_T01	GRMZM2G025731	1	256047407	256053743	8447.05	4150.27	0.491328	-1.02524	1465.57	0	0	0	0	1	-1	seq_var
GRMZM2G025870_T01	GRMZM2G025870	3	154114089	154115919	980.078	312.98	0.319341	-1.64683	344.161	7.91839e-77	4.61779e-76	7.1899e-73	5.9578e-73	1	-1	seq_var
GRMZM2G026147_T05	GRMZM2G026147	1	85027910	85029733	590.383	197.75	0.334952	-1.57798	195.603	1.90318e-44	7.43902e-44	1.72808e-40	1.28617e-40	1	-1	seq_var
GRMZM2G026470_T02	GRMZM2G026470	8	100378804	100381018	403.761	154.951	0.383769	-1.38169	110.802	6.53851e-26	1.87404e-25	5.93697e-22	3.86622e-22	1	-1	seq_var	salt_down; uv_up
GRMZM2G026868_T01	GRMZM2G026868	3	3026957	3028120	518.827	248.059	0.478115	-1.06457	95.6012	1.40519e-22	3.75711e-22	1.27592e-18	7.98853e-19	1	-1	seq_var
GRMZM2G026881_T01	GRMZM2G026881	5	50479549	50481319	532.771	128.206	0.240641	-2.05505	247.622	8.56877e-56	3.90977e-55	7.78045e-52	6.07612e-52	1	-1	seq_var
GRMZM2G027462_T01	GRMZM2G027462	1	230428704	230434399	689.916	5.39045	0.0078132	-6.99987	673.912	1.40899e-148	1.53034e-147	1.27936e-144	1.16171e-144	1	-1	seq_var
GRMZM2G027862_T01	GRMZM2G027862	6	112427408	112429462	1305	426.909	0.327133	-1.61205	445.199	7.99948e-99	5.97821e-98	7.26352e-95	6.29239e-95	1	-1	seq_var
GRMZM2G028096_T04	GRMZM2G028096	5	182586523	182592899	829.517	39.1247	0.0471656	-4.40612	719.192	2.00588e-158	2.35315e-157	1.82134e-154	1.66628e-154	1	-1	seq_var	heat_up; salt_up
GRMZM2G028183_T01	GRMZM2G028183	2	143898466	143903136	1137.41	3.489	0.00306748	-8.34873	1126.99	4.49531e-247	8.7591e-246	4.08174e-243	3.87271e-243	1	-1	seq_var
GRMZM2G028325_T02	GRMZM2G028325	5	206972501	206976357	947.85	391.502	0.413042	-1.27564	231.1	3.43178e-52	1.4888e-51	3.11606e-48	2.39813e-48	1	-1	seq_var	salt_up; uv_down
GRMZM2G028516_T01	GRMZM2G028516	8	163981580	163985761	3350.81	819.617	0.244603	-2.03149	1536.28	0	0	0	0	1	-1	seq_var
GRMZM2G028700_T01	GRMZM2G028700	1	174660753	174671403	6300.27	387.767	0.0615477	-4.02215	5226.9	0	0	0	0	1	-1	seq_var
GRMZM2G028902_T01	GRMZM2G028902	10	142207946	142212938	303.756	48.3574	0.159198	-2.65111	185.249	3.46372e-42	1.30555e-41	3.14506e-38	2.311e-38	1	-1	seq_var
GRMZM2G029029_T01	GRMZM2G029029	5	204137280	204142569	1834.27	674.462	0.367701	-1.44339	536.186	1.27388e-118	1.14297e-117	1.15669e-114	1.0279e-114	1	-1	seq_var
GRMZM2G029058_T01	GRMZM2G029058	4	227746592	227753142	952.369	374.357	0.39308	-1.3471	251.821	1.04122e-56	4.80643e-56	9.45424e-53	7.40721e-53	1	-1	seq_var	heat_up; salt_up; uv_up
GRMZM2G029077_T01	GRMZM2G029077	8	145009332	145018089	1623.61	241.956	0.149024	-2.74639	1023.26	1.5779e-224	2.75526e-223	1.43273e-220	1.35084e-220	1	-1	seq_var
GRMZM2G029107_T01	GRMZM2G029107	9	134490909	134494910	306.806	149.193	0.486279	-1.04014	54.4777	1.57223e-13	3.31689e-13	1.42759e-09	7.51056e-10	1	-1	seq_var
GRMZM2G029385_T01	GRMZM2G029385	1	283276750	283278318	266.531	130.329	0.488981	-1.03215	46.7448	8.08599e-12	1.61223e-11	7.34208e-08	3.66053e-08	1	-1	seq_var	heat_on; salt_on
GRMZM2G029407_T01	GRMZM2G029407	9	109193116	109199410	785.028	0.005901	7.51693e-06	-17.0214	785.01	9.79934e-173	1.2621e-171	8.8978e-169	8.20792e-169	1	-1	seq_var	cold_on; salt_off; uv_off
GRMZM2G029583_T01	GRMZM2G029583	5	181433676	181437224	1609.05	642.964	0.399591	-1.3234	414.441	3.95735e-92	2.77473e-91	3.59327e-88	3.08119e-88	1	-1	seq_var
GRMZM2G029845_T01	GRMZM2G029845	8	6394792	6398354	1311.75	223.702	0.170537	-2.55184	771.007	1.08619e-169	1.37554e-168	9.86262e-166	9.0849e-166	1	-1	seq_var
GRMZM2G029868_T04	GRMZM2G029868	8	141556314	141560261	3167.2	472.626	0.149225	-2.74444	1994.8	0	0	0	0	1	-1	seq_var
GRMZM2G030016_T02	GRMZM2G030016	1	46131160	46133943	1182.74	509.692	0.430943	-1.21443	267.657	3.67801e-60	1.76794e-59	3.33963e-56	2.64522e-56	1	-1	seq_var
GRMZM2G030293_T01	GRMZM2G030293	9	137120621	137122323	262.19	121.206	0.462283	-1.11315	51.8433	6.01117e-13	1.24473e-12	5.45814e-09	2.82285e-09	1	-1	seq_var
GRMZM2G030408_T01	GRMZM2G030408	1	149968359	149978577	414.416	115.823	0.279486	-1.83915	168.145	1.88034e-38	6.68237e-38	1.70734e-34	1.22711e-34	1	-1	seq_var
GRMZM2G030463_T01	GRMZM2G030463	4	12594419	12624115	5683.97	2806.22	0.493707	-1.01827	975.418	3.95953e-214	6.50136e-213	3.59525e-210	3.37669e-210	1	-1	seq_var
GRMZM2G030915_T01	GRMZM2G030915	9	148335504	148347470	942.475	292.555	0.310411	-1.68775	342.013	2.32583e-76	1.35375e-75	2.11185e-72	1.74925e-72	1	-1	seq_var
GRMZM2G031239_T01	GRMZM2G031239	3	33505609	33511064	562.635	225.094	0.400072	-1.32167	144.635	2.58038e-33	8.42195e-33	2.34299e-29	1.62538e-29	1	-1	seq_var
GRMZM2G031317_T01	GRMZM2G031317	10	4740034	4741046	775.66	148.149	0.190997	-2.38838	426.247	1.06595e-94	7.71836e-94	9.67883e-91	8.34319e-91	1	-1	seq_var	heat_down; salt_down; uv_up
GRMZM2G031568_T01	GRMZM2G031568	3	67694182	67699591	5062.66	822.712	0.162506	-2.62144	3054.55	0	0	0	0	1	-1	seq_var
GRMZM2G031580_T01	GRMZM2G031580	6	160327059	160328898	82.6409	19.4052	0.234814	-2.09041	39.1858	3.85342e-10	7.24112e-10	3.49891e-06	1.63732e-06	1	-1	seq_var	cold_up; uv_down
GRMZM2G031586_T02	GRMZM2G031586	10	141365841	141367694	292.308	126.73	0.43355	-1.20573	65.426	6.03382e-16	1.36865e-15	5.4787e-12	3.06397e-12	1	-1	seq_var
GRMZM2G031981_T01	GRMZM2G031981	2	13838928	13861148	926.284	220.748	0.238316	-2.06905	433.973	2.21941e-96	1.6278e-95	2.01522e-92	1.74068e-92	1	-1	seq_var
GRMZM2G032028_T01	GRMZM2G032028	6	104030339	104033096	1912.57	472.354	0.246974	-2.01757	869.723	3.7482e-191	5.35964e-190	3.40337e-187	3.16573e-187	1	-1	seq_var
GRMZM2G032260_T02	GRMZM2G032260	2	13877200	13883313	517.197	196.114	0.379187	-1.39902	144.529	2.72297e-33	8.87778e-33	2.47246e-29	1.71438e-29	1	-1	seq_var
GRMZM2G032336_T01	GRMZM2G032336	7	149639376	149658357	1183.69	96.5071	0.081531	-3.61651	923.265	8.59724e-203	1.3231e-201	7.80629e-199	7.29992e-199	1	-1	seq_var
GRMZM2G032564_T01	GRMZM2G032564	10	79284957	79287680	487.213	209.551	0.430102	-1.21725	110.649	7.06488e-26	2.02363e-25	6.41491e-22	4.17605e-22	1	-1	seq_var
GRMZM2G032684_T01	GRMZM2G032684	10	82170212	82180242	1992.48	375.518	0.188467	-2.40762	1104.13	4.1818e-242	7.99384e-241	3.79707e-238	3.59886e-238	1	-1	seq_var
GRMZM2G032759_T01	GRMZM2G032759	7	170181112	170184711	346.146	123.614	0.357115	-1.48554	105.417	9.89775e-25	2.77125e-24	8.98715e-21	5.77864e-21	1	-1	seq_var
GRMZM2G033093_T01	GRMZM2G033093	2	42361408	42365396	462.578	211.942	0.458175	-1.12603	93.131	4.89451e-22	1.29418e-21	4.44421e-18	2.76393e-18	1	-1	seq_var
GRMZM2G033219_T01	GRMZM2G033219	2	4839737	4846170	914.617	372.069	0.406803	-1.2976	228.773	1.10396e-51	4.75521e-51	1.0024e-47	7.69793e-48	1	-1	seq_var
GRMZM2G033236_T02	GRMZM2G033236	4	198956562	198957649	795.978	306.96	0.385639	-1.37468	216.819	4.4693e-49	1.86067e-48	4.05812e-45	3.08382e-45	1	-1	seq_var	heat_up; salt_up
GRMZM2G033680_T01	GRMZM2G033680	10	7869640	7874007	2161.15	600.074	0.277664	-1.84859	882.566	6.05114e-194	8.77705e-193	5.49444e-190	5.11624e-190	1	-1	seq_var
GRMZM2G033885_T02	GRMZM2G033885	7	157314643	157315989	283722	75052.3	0.264528	-1.91851	121366	0	0	0	0	1	-1	seq_var
GRMZM2G034260_T01	GRMZM2G034260	2	195696769	195702820	656.293	285.991	0.435766	-1.19837	145.523	1.65041e-33	5.40221e-33	1.49857e-29	1.04091e-29	1	-1	seq_var
GRMZM2G034276_T01	GRMZM2G034276	5	24734055	24743740	2121.52	980.311	0.462078	-1.11379	419.871	2.60372e-93	1.85571e-92	2.36418e-89	2.03272e-89	1	-1	seq_var
GRMZM2G034288_T01	GRMZM2G034288	7	38218079	38231106	904.551	2e-06	2.21104e-09	-28.7526	904.551	1.00574e-198	1.50944e-197	9.1321e-195	8.52464e-195	1	-1	seq_var
GRMZM2G034326_T02	GRMZM2G034326	5	1123117	1125570	1640.63	529.06	0.322474	-1.63274	569.475	7.3046e-126	6.90175e-125	6.63258e-122	5.93134e-122	1	-1	seq_var	heat_up; uv_down
GRMZM2G034342_T01	GRMZM2G034342	8	100925830	100928357	531.155	262.917	0.49499	-1.01453	90.6114	1.74849e-21	4.57531e-21	1.58763e-17	9.8108e-18	1	-1	seq_var
GRMZM2G034372_T01	GRMZM2G034372	1	112335598	112344832	1419.62	275.902	0.194349	-2.36328	771.497	8.49518e-170	1.07732e-168	7.71362e-166	7.10621e-166	1	-1	seq_var
GRMZM2G034639_T01	GRMZM2G034639	3	171190834	171199550	1037.73	358.907	0.345857	-1.53175	329.937	9.91897e-74	5.6255e-73	9.00642e-70	7.41939e-70	1	-1	seq_var
GRMZM2G034764_T01	GRMZM2G034764	2	208743159	208745513	806.023	128.285	0.159158	-2.65147	491.625	6.31148e-109	5.14899e-108	5.73083e-105	5.02899e-105	1	-1	seq_var
GRMZM2G034943_T01	GRMZM2G034943	3	223392262	223395012	898.608	229.985	0.255934	-1.96615	396.119	3.85247e-88	2.58731e-87	3.49804e-84	2.97757e-84	1	-1	seq_var
GRMZM2G035073_T01	GRMZM2G035073	5	68336721	68338639	714.148	306.033	0.428528	-1.22254	163.263	2.19133e-37	7.61181e-37	1.98973e-33	1.41713e-33	1	-1	seq_var	cold_up; heat_off; salt_off; uv_off
GRMZM2G035202_T02	GRMZM2G035202	8	116382083	116385353	1915.01	107.853	0.05632	-4.15021	1614.45	0	0	0	0	1	-1	seq_var
GRMZM2G035325_T01	GRMZM2G035325	2	3115774	3119828	1116.84	335.444	0.300351	-1.73528	420.428	1.96902e-93	1.40666e-92	1.78787e-89	1.5378e-89	1	-1	seq_var
GRMZM2G035417_T01	GRMZM2G035417	9	32078633	32089472	7957.63	2801.57	0.352061	-1.5061	2470.9	0	0	0	0	1	-1	seq_var
GRMZM2G035557_T01	GRMZM2G035557	1	71803251	71804133	5270.36	1449.56	0.275039	-1.86229	2172.43	0	0	0	0	1	-1	seq_var	cold_up; heat_down
GRMZM2G035632_T01	GRMZM2G035632	5	14941523	14943361	413.219	127.055	0.307477	-1.70145	151.57	7.8652e-35	2.62849e-34	7.1416e-31	5.00541e-31	1	-1	seq_var
GRMZM2G035790_T01	GRMZM2G035790	3	195121819	195124267	955.427	326.475	0.341705	-1.54918	308.59	4.43092e-69	2.36108e-68	4.02328e-65	3.26869e-65	1	-1	seq_var
GRMZM2G035805_T01	GRMZM2G035805	8	168465982	168466855	775.616	251.95	0.324839	-1.6222	266.869	5.46065e-60	2.6165e-59	4.95827e-56	3.92402e-56	1	-1	seq_var
GRMZM2G036629_T01	GRMZM2G036629	1	74271511	74272239	272.384	68.1243	0.250104	-1.9994	122.528	1.76866e-28	5.30891e-28	1.60594e-24	1.0711e-24	1	-1	seq_var
GRMZM2G036685_T01	GRMZM2G036685	10	4561180	4568012	1210.15	54.226	0.0448093	-4.48006	1056.77	8.20412e-232	1.49585e-230	7.44934e-228	7.04159e-228	1	-1	seq_var
GRMZM2G036837_T01	GRMZM2G036837	8	4916708	4925557	840.49	160.146	0.190539	-2.39184	462.573	1.32394e-102	1.02396e-101	1.20213e-98	1.04684e-98	1	-1	seq_var
GRMZM2G036991_T02	GRMZM2G036991	5	63740445	63742060	578.933	197.239	0.340694	-1.55345	187.704	1.00832e-42	3.84043e-42	9.15558e-39	6.75274e-39	1	-1	seq_var
GRMZM2G037140_T01	GRMZM2G037140	6	35896141	35897813	1906.7	908.765	0.476618	-1.0691	353.714	6.5839e-79	3.92527e-78	5.97818e-75	4.97611e-75	1	-1	seq_var
GRMZM2G037189_T01	GRMZM2G037189	7	171577921	171579167	1588.32	80.0488	0.0503983	-4.31048	1363.54	1.75838e-298	4.42274e-297	1.59661e-294	1.53331e-294	1	-1	seq_var	cold_up; heat_up; uv_up
GRMZM2G037342_T01	GRMZM2G037342	4	3752277	3757733	1955.7	595.537	0.304514	-1.71542	725.155	1.01348e-159	1.20136e-158	9.20242e-156	8.4271e-156	1	-1	seq_var	salt_up; uv_down
GRMZM2G037378_T01	GRMZM2G037378	10	25674791	25677448	789.245	375.286	0.475501	-1.07248	147.151	7.27484e-34	2.39592e-33	6.60555e-30	4.60061e-30	1	-1	seq_var
GRMZM2G037379_T02	GRMZM2G037379	3	204197529	204201535	355.336	55.8191	0.157088	-2.67035	218.191	2.24323e-49	9.39073e-49	2.03685e-45	1.55052e-45	1	-1	seq_var
GRMZM2G037472_T01	GRMZM2G037472	4	3748230	3751679	781.215	92.2526	0.118089	-3.08206	543.431	3.38096e-120	3.07298e-119	3.06991e-116	2.73249e-116	1	-1	seq_var
GRMZM2G037650_T01	GRMZM2G037650	1	207220915	207226619	300.686	147.639	0.491007	-1.02618	52.2463	4.89581e-13	1.01679e-12	4.44539e-09	2.30544e-09	1	-1	seq_var
GRMZM2G038374_T01	GRMZM2G038374	5	157501508	157507721	1463.68	429.479	0.293424	-1.76894	564.965	6.99111e-125	6.56456e-124	6.34793e-121	5.67259e-121	1	-1	seq_var
GRMZM2G038519_T04	GRMZM2G038519	2	207611986	207614077	98502.4	25738.1	0.261295	-1.93625	42616	0	0	0	0	1	-1	seq_var
GRMZM2G038848_T01	GRMZM2G038848	1	254719163	254723764	1852.13	839.354	0.453183	-1.14183	381.097	7.17951e-85	4.64647e-84	6.519e-81	5.51243e-81	1	-1	seq_var
GRMZM2G039263_T01	GRMZM2G039263	4	174931116	174936588	1328.6	534.47	0.40228	-1.31373	338.498	1.35491e-75	7.83108e-75	1.23026e-71	1.01754e-71	1	-1	seq_var
GRMZM2G039583_T03	GRMZM2G039583	7	168123265	168125467	396.991	197.414	0.497275	-1.00788	67.0101	2.70123e-16	6.17967e-16	2.45271e-12	1.38087e-12	1	-1	seq_var
GRMZM2G039725_T01	GRMZM2G039725	5	197836536	197838378	500.859	74.1237	0.147993	-2.7564	316.71	7.54207e-71	4.1304e-70	6.8482e-67	5.59848e-67	1	-1	seq_var
GRMZM2G039961_T01	GRMZM2G039961	2	4577139	4578125	268.436	19.2475	0.0717024	-3.80183	215.844	7.29276e-49	3.02781e-48	6.62182e-45	5.02763e-45	1	-1	seq_var	cold_on; uv_on
GRMZM2G039988_T01	GRMZM2G039988	2	30802316	30802870	821.83	354.687	0.431582	-1.21229	185.482	3.08092e-42	1.16271e-41	2.79748e-38	2.05652e-38	1	-1	seq_var
GRMZM2G040720_T01	GRMZM2G040720	4	210477496	210504209	639.102	4.23793	0.00663107	-7.23654	626.5	2.88397e-138	2.89033e-137	2.61864e-134	2.35764e-134	1	-1	seq_var
GRMZM2G040843_T01	GRMZM2G040843	10	300326	310785	4118.18	1856.4	0.450781	-1.1495	856.239	3.20105e-188	4.49236e-187	2.90655e-184	2.69977e-184	1	-1	seq_var
GRMZM2G041159_T01	GRMZM2G041159	4	236714717	236718993	750.822	210.102	0.27983	-1.83738	304.268	3.87286e-68	2.04451e-67	3.51655e-64	2.85081e-64	1	-1	seq_var
GRMZM2G041181_T01	GRMZM2G041181	7	157936484	157941437	3111.62	1538.55	0.494452	-1.0161	532.144	9.64811e-118	8.54681e-117	8.76048e-114	7.77251e-114	1	-1	seq_var
GRMZM2G041424_T01	GRMZM2G041424	5	30384873	30385423	136.852	42.9887	0.314125	-1.67059	48.9897	2.57314e-12	5.21753e-12	2.33641e-08	1.18442e-08	1	-1	seq_var	cold_up; heat_up; salt_up; uv_up
GRMZM2G042006_T03	GRMZM2G042006	7	114383417	114386275	186.459	0	0	-Inf	186.459	1.88477e-42	7.14859e-42	1.71137e-38	1.26035e-38	1	-1	seq_var
GRMZM2G042078_T01	GRMZM2G042078	3	223182549	223185532	236.267	95.2691	0.403226	-1.31034	59.9646	9.65766e-15	2.11969e-14	8.76916e-11	4.77475e-11	1	-1	seq_var
GRMZM2G042099_T01	GRMZM2G042099	3	198590119	198607744	1012.3	497.247	0.491206	-1.0256	175.734	4.14024e-40	1.51525e-39	3.75933e-36	2.73256e-36	1	-1	seq_var
GRMZM2G042380_T02	GRMZM2G042380	4	170996275	171000497	599.622	0.016542	2.75874e-05	-15.1456	599.572	2.0744e-132	2.02316e-131	1.88356e-128	1.69064e-128	1	-1	seq_var
GRMZM2G042683_T01	GRMZM2G042683	1	65091947	65093876	343.188	165.819	0.483174	-1.04939	61.8057	3.79078e-15	8.41366e-15	3.44203e-11	1.8916e-11	1	-1	seq_var
GRMZM2G042806_T02	GRMZM2G042806	6	102909463	102911611	1287.66	635.064	0.493192	-1.01978	221.499	4.25967e-50	1.7973e-49	3.86778e-46	2.95153e-46	1	-1	seq_var
GRMZM2G043075_T01	GRMZM2G043075	4	86526486	86530801	4527.71	885.46	0.195565	-2.35428	2450.69	0	0	0	0	1	-1	seq_var
GRMZM2G043191_T01	GRMZM2G043191	1	253852796	253855290	464.751	37.7161	0.0811533	-3.62321	362.927	6.49152e-81	3.99885e-80	5.8943e-77	4.9381e-77	1	-1	seq_var	heat_up; salt_up; uv_up
GRMZM2G043983_T03	GRMZM2G043983	9	133644569	133651673	127.131	1e-06	7.86591e-09	-26.9217	127.131	1.73912e-29	5.31332e-29	1.57912e-25	1.06243e-25	1	-1	seq_var
GRMZM2G044343_T01	GRMZM2G044343	8	141461835	141466833	853.455	403.228	0.472466	-1.08172	161.301	5.88008e-37	2.027e-36	5.33911e-33	3.79089e-33	1	-1	seq_var
GRMZM2G044398_T03	GRMZM2G044398	6	89844833	89855828	1533.91	595.904	0.388486	-1.36407	413.116	7.687e-92	5.36083e-91	6.9798e-88	5.97972e-88	1	-1	seq_var
GRMZM2G044457_T01	GRMZM2G044457	6	155590869	155597031	572.417	280.406	0.489862	-1.02955	99.9866	1.5343e-23	4.19369e-23	1.39314e-19	8.83602e-20	1	-1	seq_var
GRMZM2G044552_T01	GRMZM2G044552	3	19255236	19258408	927.799	358.008	0.385867	-1.37382	252.497	7.41379e-57	3.42756e-56	6.73172e-53	5.2764e-53	1	-1	seq_var
GRMZM2G044581_T01	GRMZM2G044581	3	160618655	160623140	733.416	2.27399	0.00310054	-8.33326	726.622	4.86124e-160	5.78506e-159	4.414e-156	4.04358e-156	1	-1	seq_var
GRMZM2G044902_T01	GRMZM2G044902	1	77152675	77154117	671.504	79.8557	0.118921	-3.07193	465.885	2.5185e-103	1.95955e-102	2.28679e-99	1.99314e-99	1	-1	seq_var	cold_on; heat_on
GRMZM2G045748_T02	GRMZM2G045748	7	112497824	112499581	256.337	14.4493	0.0563686	-4.14896	216.073	6.50214e-49	2.70203e-48	5.90395e-45	4.48388e-45	1	-1	seq_var
GRMZM2G045753_T02	GRMZM2G045753	4	10253611	10258385	365.964	4.8e-05	1.3116e-07	-22.8622	365.964	1.41581e-81	8.79913e-81	1.28555e-77	1.07884e-77	1	-1	seq_var
GRMZM2G045892_T02	GRMZM2G045892	6	144849851	144860479	2128.45	332.202	0.156077	-2.67967	1311.24	4.08612e-287	9.71255e-286	3.71019e-283	3.55451e-283	1	-1	seq_var
GRMZM2G046061_T01	GRMZM2G046061	3	129109119	129110434	353.18	97.5053	0.276079	-1.85685	145.044	2.10017e-33	6.862e-33	1.90695e-29	1.32352e-29	1	-1	seq_var
GRMZM2G046163_T01	GRMZM2G046163	1	288338457	288340582	10028.8	3573.49	0.356322	-1.48875	3063.55	0	0	0	0	1	-1	seq_var
GRMZM2G046191_T01	GRMZM2G046191	1	288331936	288337173	590.058	219.494	0.371987	-1.42668	169.622	8.94852e-39	3.19892e-38	8.12526e-35	5.85323e-35	1	-1	seq_var
GRMZM2G046317_T01	GRMZM2G046317	7	57763773	57764719	6971.8	1712.64	0.245653	-2.02531	3184.86	0	0	0	0	1	-1	seq_var
GRMZM2G046355_T03	GRMZM2G046355	3	2503633	2525579	1391.2	458.405	0.329504	-1.60163	470.428	2.58627e-104	2.03143e-103	2.34833e-100	2.04962e-100	1	-1	seq_var
GRMZM2G046382_T01	GRMZM2G046382	1	38724461	38725514	1048.2	421.796	0.402402	-1.31329	266.925	5.31122e-60	2.54624e-59	4.82258e-56	3.81717e-56	1	-1	seq_var	heat_up; salt_up
GRMZM2G046952_T02	GRMZM2G046952	10	132120550	132121962	1295.75	247.319	0.190869	-2.38934	712.352	6.16331e-157	7.13811e-156	5.59628e-153	5.1137e-153	1	-1	seq_var	uv_up
GRMZM2G047002_T02	GRMZM2G047002	1	8973718	8975454	1872.85	823.098	0.43949	-1.1861	408.753	6.84898e-91	4.74723e-90	6.21887e-87	5.32234e-87	1	-1	seq_var	cold_up; salt_up
GRMZM2G047093_T01	GRMZM2G047093	3	218808861	218827037	4295.64	416.43	0.0969426	-3.36673	3193.56	0	0	0	0	1	-1	seq_var
GRMZM2G047187_T02	GRMZM2G047187	1	85839774	85844369	458.356	154.248	0.336524	-1.57122	150.965	1.06657e-34	3.55785e-34	9.68447e-31	6.78233e-31	1	-1	seq_var
GRMZM2G047204_T01	GRMZM2G047204	6	74232836	74235724	495.542	158.184	0.319214	-1.6474	174.095	9.43751e-40	3.43182e-39	8.56926e-36	6.21365e-36	1	-1	seq_var
GRMZM2G047292_T02	GRMZM2G047292	2	139818321	139820635	1780.82	378.115	0.212326	-2.23565	911.369	3.31377e-200	5.01484e-199	3.0089e-196	2.81041e-196	1	-1	seq_var	heat_up; salt_up
GRMZM2G047298_T01	GRMZM2G047298	3	213856365	213860258	375.816	127.652	0.339668	-1.5578	122.322	1.96298e-28	5.8883e-28	1.78239e-24	1.18839e-24	1	-1	seq_var
GRMZM2G047347_T02	GRMZM2G047347	2	18827076	18842072	816.885	260.656	0.319085	-1.64799	287.127	2.10187e-64	1.06145e-63	1.90849e-60	1.53079e-60	1	-1	seq_var
GRMZM2G047815_T02	GRMZM2G047815	3	13736055	13738686	707.949	79.2792	0.111984	-3.15863	502.047	3.40856e-111	2.83942e-110	3.09497e-107	2.72378e-107	1	-1	seq_var
GRMZM2G047968_T02	GRMZM2G047968	1	189719492	189721351	782.114	380.918	0.487036	-1.0379	138.396	5.97122e-32	1.89974e-31	5.42186e-28	3.71828e-28	1	-1	seq_var	cold_up; salt_down
GRMZM2G048067_T01	GRMZM2G048067	10	1411349	1423184	2744.27	1304.46	0.47534	-1.07297	512.025	2.29914e-113	1.94378e-112	2.08762e-109	1.84092e-109	1	-1	seq_var
GRMZM2G048117_T01	GRMZM2G048117	8	124996326	124999871	514.763	119.332	0.231819	-2.10893	246.597	1.43332e-55	6.52034e-55	1.30146e-51	1.01551e-51	1	-1	seq_var
GRMZM2G048549_T02	GRMZM2G048549	5	39842071	39845900	991.181	356.065	0.359233	-1.47701	299.406	4.43837e-67	2.31878e-66	4.03004e-63	3.25909e-63	1	-1	seq_var	salt_up
GRMZM2G048616_T01	GRMZM2G048616	1	182418108	182420563	1264.82	208.81	0.165091	-2.59867	756.742	1.37254e-166	1.70956e-165	1.24627e-162	1.14635e-162	1	-1	seq_var	salt_up
GRMZM2G048804_T02	GRMZM2G048804	8	15960793	15980220	1774.1	559.943	0.31562	-1.66374	631.601	2.24242e-139	2.26739e-138	2.03612e-135	1.83497e-135	1	-1	seq_var
GRMZM2G048912_T01	GRMZM2G048912	2	236748239	236754699	1107.37	157.528	0.142254	-2.81346	713.257	3.91752e-157	4.55456e-156	3.55711e-153	3.25154e-153	1	-1	seq_var
GRMZM2G049057_T01	GRMZM2G049057	1	207079822	207082141	586.076	165.609	0.282572	-1.82331	235.195	4.38922e-53	1.93185e-52	3.98541e-49	3.08035e-49	1	-1	seq_var
GRMZM2G049484_T01	GRMZM2G049484	9	150616637	150620939	641.392	46.2443	0.0720999	-3.79386	515.099	4.92969e-114	4.19509e-113	4.47616e-110	3.95065e-110	1	-1	seq_var
GRMZM2G050131_T01	GRMZM2G050131	2	102982596	102984338	3671.38	749.729	0.204209	-2.29188	1930.75	0	0	0	0	1	-1	seq_var
GRMZM2G050730_T02	GRMZM2G050730	10	4994123	4995128	1738.37	172.03	0.0989604	-3.337	1284.25	2.99461e-281	6.97206e-280	2.7191e-277	2.60261e-277	1	-1	seq_var
GRMZM2G050803_T01	GRMZM2G050803	8	164415013	164417628	989.077	466.712	0.471866	-1.08355	187.435	1.15421e-42	4.39423e-42	1.04802e-38	7.7286e-39	1	-1	seq_var
GRMZM2G050842_T02	GRMZM2G050842	6	29285522	29300829	2231.5	1016.74	0.455631	-1.13406	454.289	8.40759e-101	6.40444e-100	7.63409e-97	6.63275e-97	1	-1	seq_var
GRMZM2G050925_T01	GRMZM2G050925	2	52066948	52071130	261.869	3.66189	0.0139837	-6.16011	251.086	1.50586e-56	6.93722e-56	1.36733e-52	1.07067e-52	1	-1	seq_var
GRMZM2G051630_T01	GRMZM2G051630	6	131343782	131347669	4395.72	2163.8	0.492251	-1.02253	759.428	3.57682e-167	4.46734e-166	3.24775e-163	2.98808e-163	1	-1	seq_var
GRMZM2G051677_T02	GRMZM2G051677	6	3573645	3576235	1319.48	447.464	0.339122	-1.56012	430.352	1.36253e-95	9.93715e-95	1.23718e-91	1.06768e-91	1	-1	seq_var
GRMZM2G051752_T01	GRMZM2G051752	2	177753432	177754662	2346.74	1002.1	0.42702	-1.22762	539.899	1.98356e-119	1.79212e-118	1.80108e-115	1.60193e-115	1	-1	seq_var
GRMZM2G051753_T02	GRMZM2G051753	3	10940297	10946516	2638.5	1296.23	0.491273	-1.0254	457.899	1.37782e-101	1.05485e-100	1.25106e-97	1.08779e-97	1	-1	seq_var
GRMZM2G051782_T01	GRMZM2G051782	9	146557362	146563443	2514.26	366.995	0.145965	-2.7763	1600.26	0	0	0	0	1	-1	seq_var	salt_up; uv_down
GRMZM2G051984_T01	GRMZM2G051984	2	35166363	35170021	756.202	202.318	0.267545	-1.90215	320.063	1.40312e-71	7.75428e-71	1.27403e-67	1.04364e-67	1	-1	seq_var
GRMZM2G052279_T01	GRMZM2G052279	2	142659254	142668470	199.438	2.29564	0.0115105	-6.4409	192.656	8.36853e-44	3.24035e-43	7.59863e-40	5.63704e-40	1	-1	seq_var
GRMZM2G052509_T01	GRMZM2G052509	7	141921287	141923938	626.24	306.5	0.489429	-1.03083	109.606	1.19536e-25	3.40672e-25	1.08538e-21	7.04662e-22	1	-1	seq_var
GRMZM2G052544_T01	GRMZM2G052544	5	86297888	86301099	1112.21	553.618	0.497765	-1.00646	187.308	1.23002e-42	4.67694e-42	1.11685e-38	8.23249e-39	1	-1	seq_var
GRMZM2G052884_T01	GRMZM2G052884	4	98948954	98953985	275.511	63.1233	0.229113	-2.12587	133.207	8.14494e-31	2.54845e-30	7.39561e-27	5.03276e-27	1	-1	seq_var
GRMZM2G053023_T03	GRMZM2G053023	1	289180898	289182012	630.423	206.169	0.327034	-1.61249	215.148	1.0348e-48	4.28451e-48	9.39594e-45	7.12767e-45	1	-1	seq_var
GRMZM2G053676_T01	GRMZM2G053676	5	67658451	67663549	752.524	195.82	0.260218	-1.94221	326.801	4.78242e-73	2.68549e-72	4.34244e-69	3.5696e-69	1	-1	seq_var
GRMZM2G053720_T01	GRMZM2G053720	1	88349118	88351781	10642.7	2081.57	0.195587	-2.35412	5760.07	0	0	0	0	1	-1	seq_var
GRMZM2G053767_T03	GRMZM2G053767	6	114919113	114920980	202.761	0.015071	7.43289e-05	-13.7157	202.716	5.33595e-46	2.14003e-45	4.84504e-42	3.63751e-42	1	-1	seq_var
GRMZM2G054056_T03	GRMZM2G054056	6	143540400	143552223	1069.44	399.791	0.373833	-1.41953	305.212	2.41182e-68	1.27544e-67	2.18993e-64	1.77606e-64	1	-1	seq_var
GRMZM2G054136_T01	GRMZM2G054136	7	166427089	166429948	1413.25	568.206	0.402055	-1.31454	360.394	2.31083e-80	1.40163e-79	2.09824e-76	1.75254e-76	1	-1	seq_var
GRMZM2G054210_T01	GRMZM2G054210	4	173239464	173253984	444.657	64.859	0.145863	-2.77731	283.105	1.58113e-63	7.91435e-63	1.43566e-59	1.149e-59	1	-1	seq_var
GRMZM2G054252_T02	GRMZM2G054252	1	195218120	195221530	19055	5849.07	0.306957	-1.70389	7002.75	0	0	0	0	1	-1	seq_var
GRMZM2G054465_T01	GRMZM2G054465	9	99494900	99504275	1200.15	417.004	0.34746	-1.52508	379.258	1.80511e-84	1.16409e-83	1.63904e-80	1.38506e-80	1	-1	seq_var
GRMZM2G054481_T01	GRMZM2G054481	10	4529985	4531757	655.872	306.213	0.46688	-1.09888	127.079	1.78486e-29	5.45123e-29	1.62065e-25	1.09019e-25	1	-1	seq_var
GRMZM2G054678_T01	GRMZM2G054678	5	38103	51860	1039.92	486.005	0.467348	-1.09743	201.073	1.2179e-45	4.86302e-45	1.10585e-41	8.29023e-42	1	-1	seq_var
GRMZM2G055216_T01	GRMZM2G055216	7	160597155	160600964	598.412	246.657	0.412187	-1.27863	146.415	1.05324e-33	3.46124e-33	9.5634e-30	6.65435e-30	1	-1	seq_var
GRMZM2G055467_T01	GRMZM2G055467	4	187450202	187453741	600.638	133.358	0.222028	-2.17119	297.482	1.16533e-66	6.03604e-66	1.05812e-62	8.53952e-63	1	-1	seq_var
GRMZM2G055802_T01	GRMZM2G055802	1	294073998	294075815	4482.34	413.312	0.0922091	-3.43895	3381.97	0	0	0	0	1	-1	seq_var	heat_down; salt_down; uv_up
GRMZM2G055898_T01	GRMZM2G055898	3	198455740	198459784	3440.36	1245.94	0.362153	-1.46533	1027.57	1.82619e-225	3.21353e-224	1.65818e-221	1.56413e-221	1	-1	seq_var
GRMZM2G056143_T01	GRMZM2G056143	7	162800001	162802715	251.035	25.3039	0.100798	-3.31046	184.392	5.32862e-42	2.0043e-41	4.83839e-38	3.55259e-38	1	-1	seq_var
GRMZM2G056400_T01	GRMZM2G056400	1	215657189	215662587	430.953	105.907	0.24575	-2.02474	196.802	1.04164e-44	4.09266e-44	9.45814e-41	7.05194e-41	1	-1	seq_var
GRMZM2G056462_T01	GRMZM2G056462	1	55444071	55454067	552.12	219.299	0.397195	-1.33208	143.592	4.36333e-33	1.4175e-32	3.9619e-29	2.74279e-29	1	-1	seq_var
GRMZM2G056500_T01	GRMZM2G056500	2	103380502	103382701	1136.94	216.668	0.190572	-2.3916	625.66	4.3926e-138	4.38295e-137	3.98849e-134	3.5892e-134	1	-1	seq_var	salt_up
GRMZM2G056772_T01	GRMZM2G056772	7	174614622	174615429	2698.47	1233.06	0.456947	-1.1299	546.208	8.41293e-121	7.66193e-120	7.63894e-117	6.80101e-117	1	-1	seq_var	cold_up; uv_up
GRMZM2G056849_T01	GRMZM2G056849	5	41438887	41443718	571.2	276.699	0.484416	-1.04568	102.289	4.79735e-24	1.32482e-23	4.356e-20	2.77911e-20	1	-1	seq_var
GRMZM2G056986_T01	GRMZM2G056986	8	167004561	167005794	514.172	105.54	0.205262	-2.28446	269.448	1.49712e-60	7.22308e-60	1.35938e-56	1.07778e-56	1	-1	seq_var
GRMZM2G057129_T01	GRMZM2G057129	5	8145266	8148166	893.35	22.2734	0.0249324	-5.32583	828.697	3.11082e-182	4.17844e-181	2.82462e-178	2.61464e-178	1	-1	seq_var
GRMZM2G057150_T02	GRMZM2G057150	3	30235161	30239338	1369.59	593.49	0.433335	-1.20644	306.827	1.07249e-68	5.69154e-68	9.73823e-65	7.90427e-65	1	-1	seq_var
GRMZM2G057258_T03	GRMZM2G057258	6	7149478	7151851	426.18	95.7011	0.224555	-2.15486	209.274	1.97771e-47	8.05998e-47	1.79576e-43	1.35533e-43	1	-1	seq_var
GRMZM2G057475_T01	GRMZM2G057475	7	157631952	157636354	749.087	101.929	0.13607	-2.87757	492.135	4.8905e-109	3.99332e-108	4.44058e-105	3.89724e-105	1	-1	seq_var
GRMZM2G057642_T03	GRMZM2G057642	5	157556868	157560735	721.827	322.658	0.447002	-1.16165	152.55	4.80488e-35	1.61228e-34	4.36283e-31	3.06311e-31	1	-1	seq_var
GRMZM2G057743_T01	GRMZM2G057743	9	56072051	56104990	352.651	145.871	0.413643	-1.27354	85.7687	2.02259e-20	5.14718e-20	1.83651e-16	1.11505e-16	1	-1	seq_var
GRMZM2G057983_T01	GRMZM2G057983	9	33342558	33346609	3544.64	1766.99	0.498496	-1.00435	594.931	2.1206e-131	2.06599e-130	1.9255e-127	1.72808e-127	1	-1	seq_var
GRMZM2G058227_T01	GRMZM2G058227	1	249479638	249482415	815.37	284.768	0.34925	-1.51767	255.912	1.33575e-57	6.23258e-57	1.21286e-53	9.53056e-54	1	-1	seq_var
GRMZM2G058276_T01	GRMZM2G058276	8	6280931	6291548	727.017	206.936	0.284637	-1.8128	289.612	6.04051e-65	3.07271e-64	5.48478e-61	4.40716e-61	1	-1	seq_var
GRMZM2G058366_T01	GRMZM2G058366	8	27648927	27657945	1177.2	536.205	0.455493	-1.1345	239.798	4.35248e-54	1.94204e-53	3.95205e-50	3.06676e-50	1	-1	seq_var
GRMZM2G058450_T02	GRMZM2G058450	3	165771389	165774720	2735.49	710.024	0.25956	-1.94586	1190.68	6.46683e-261	1.35297e-259	5.87189e-257	5.59187e-257	1	-1	seq_var
GRMZM2G058531_T02	GRMZM2G058531	10	3187877	3191169	411.918	145.175	0.352438	-1.50456	127.719	1.29302e-29	3.96106e-29	1.17406e-25	7.90938e-26	1	-1	seq_var	heat_up; salt_off
GRMZM2G058573_T01	GRMZM2G058573	10	125923937	125946058	794.878	357.548	0.449816	-1.15259	165.96	5.64366e-38	1.98622e-37	5.12444e-34	3.66894e-34	1	-1	seq_var
GRMZM2G058910_T01	GRMZM2G058910	1	34658309	34665859	11364.2	4620.52	0.406587	-1.29837	2845.02	0	0	0	0	1	-1	seq_var	salt_up
GRMZM2G058970_T01	GRMZM2G058970	3	127727315	127732407	802.087	370.913	0.462435	-1.11268	158.492	2.41639e-36	8.26086e-36	2.19408e-32	1.55253e-32	1	-1	seq_var
GRMZM2G059026_T01	GRMZM2G059026	4	16237558	16258447	3350.52	755.31	0.225431	-2.14924	1640.38	0	0	0	0	1	-1	seq_var
GRMZM2G059134_T03	GRMZM2G059134	3	181745044	181750874	326.988	120.316	0.367952	-1.44241	95.4904	1.48607e-22	3.96867e-22	1.34935e-18	8.44235e-19	1	-1	seq_var
GRMZM2G059282_T02	GRMZM2G059282	6	115365067	115370615	304.565	134.395	0.44127	-1.18027	65.9689	4.58096e-16	1.04248e-15	4.15951e-12	2.33217e-12	1	-1	seq_var
GRMZM2G059363_T01	GRMZM2G059363	5	91851841	91869019	2954.48	1194.49	0.404298	-1.30651	746.584	2.219e-164	2.7191e-163	2.01485e-160	1.85064e-160	1	-1	seq_var
GRMZM2G059392_T01	GRMZM2G059392	3	221622808	221626947	4941.31	2450.53	0.495928	-1.0118	839.301	1.54028e-184	2.11264e-183	1.39857e-180	1.29676e-180	1	-1	seq_var
GRMZM2G059502_T05	GRMZM2G059502	1	209172696	209174536	2388.24	1040.28	0.435584	-1.19898	529.965	2.87511e-117	2.5272e-116	2.6106e-113	2.31389e-113	1	-1	seq_var	cold_up; salt_off; uv_off
GRMZM2G059851_T01	GRMZM2G059851	5	168263116	168266561	510.226	248.62	0.487274	-1.03719	90.1864	2.16742e-21	5.65197e-21	1.96802e-17	1.21354e-17	1	-1	seq_var	cold_on; heat_on
GRMZM2G060161_T01	GRMZM2G060161	2	206744431	206745494	376.599	33.3352	0.0885166	-3.49791	287.436	1.79975e-64	9.11419e-64	1.63417e-60	1.31166e-60	1	-1	seq_var	cold_up
GRMZM2G060213_T01	GRMZM2G060213	8	121936421	121946840	4255.27	1911.84	0.449288	-1.15429	890.475	1.15473e-195	1.69934e-194	1.04849e-191	9.77362e-192	1	-1	seq_var
GRMZM2G060355_T01	GRMZM2G060355	5	178309055	178313532	683.612	243.079	0.35558	-1.49175	209.422	1.83629e-47	7.49372e-47	1.66735e-43	1.25896e-43	1	-1	seq_var
GRMZM2G060485_T01	GRMZM2G060485	5	93274325	93277370	601.432	276.493	0.459725	-1.12116	120.267	5.53053e-28	1.64109e-27	5.02172e-24	3.32993e-24	1	-1	seq_var
GRMZM2G060511_T04	GRMZM2G060511	7	167979444	167984012	284.382	98.3898	0.345978	-1.53125	90.3753	1.97009e-21	5.1447e-21	1.78884e-17	1.10404e-17	1	-1	seq_var
GRMZM2G060856_T02	GRMZM2G060856	6	21182331	21184470	570.301	82.1899	0.144117	-2.79469	365.143	2.13694e-81	1.32628e-80	1.94035e-77	1.62792e-77	1	-1	seq_var
GRMZM2G060866_T01	GRMZM2G060866	7	5042139	5044297	357.275	135.889	0.38035	-1.3946	99.3815	2.08263e-23	5.67364e-23	1.89102e-19	1.19709e-19	1	-1	seq_var
GRMZM2G061702_T03	GRMZM2G061702	7	50129107	50136333	962.561	337.991	0.351137	-1.50989	299.94	3.39447e-67	1.77443e-66	3.08218e-63	2.4929e-63	1	-1	seq_var
GRMZM2G062024_T01	GRMZM2G062024	2	27456158	27492745	1326.97	203.546	0.153392	-2.7047	824.607	2.41032e-181	3.22797e-180	2.18857e-177	2.02539e-177	1	-1	seq_var
GRMZM2G062481_T01	GRMZM2G062481	6	142675237	142678942	759.02	326.816	0.430576	-1.21566	172.033	2.66102e-39	9.57672e-39	2.41621e-35	1.7451e-35	1	-1	seq_var
GRMZM2G062499_T01	GRMZM2G062499	5	161231808	161235981	1141.79	433.168	0.379377	-1.3983	318.829	2.60586e-71	1.4375e-70	2.36612e-67	1.93746e-67	1	-1	seq_var	salt_up; uv_down
GRMZM2G062585_T01	GRMZM2G062585	10	49125412	49127783	350.482	2.11524	0.00603524	-7.37237	344.187	7.81633e-77	4.5612e-76	7.09722e-73	5.88179e-73	1	-1	seq_var
GRMZM2G062641_T02	GRMZM2G062641	3	228458998	228461097	337.764	105.639	0.312761	-1.67687	121.519	2.9418e-28	8.77227e-28	2.67115e-24	1.77567e-24	1	-1	seq_var
GRMZM2G063162_T01	GRMZM2G063162	5	139395266	139403105	25370.7	3309.44	0.130443	-2.93851	16969.9	0	0	0	0	1	-1	seq_var	heat_up; salt_up
GRMZM2G063276_T02	GRMZM2G063276	4	167063264	167064547	324.856	19.849	0.0611008	-4.03266	269.881	1.20452e-60	5.81756e-60	1.0937e-56	8.67372e-57	1	-1	seq_var
GRMZM2G063438_T01	GRMZM2G063438	9	2058851	2060648	2299.13	463.844	0.201747	-2.30938	1219.08	4.35604e-267	9.50789e-266	3.95528e-263	3.77451e-263	1	-1	seq_var
GRMZM2G063729_T02	GRMZM2G063729	8	146135066	146138945	1203.6	347.196	0.288464	-1.79354	472.938	7.35326e-105	5.81599e-104	6.67676e-101	5.83334e-101	1	-1	seq_var
GRMZM2G063792_T01	GRMZM2G063792	4	131279153	131282696	4686.17	1004.33	0.214317	-2.22218	2382.21	0	0	0	0	1	-1	seq_var
GRMZM2G063806_T01	GRMZM2G063806	7	40127509	40134293	1800.66	818.696	0.454664	-1.13713	368.127	4.7871e-82	2.99565e-81	4.34669e-78	3.65256e-78	1	-1	seq_var	cold_up; heat_down; salt_down
GRMZM2G064107_T01	GRMZM2G064107	3	157782390	157799784	382.424	35.9369	0.0939715	-3.41163	286.961	2.28457e-64	1.15244e-63	2.07439e-60	1.66339e-60	1	-1	seq_var
GRMZM2G064390_T01	GRMZM2G064390	5	37098047	37121806	1286.42	448.389	0.348557	-1.52053	404.823	4.9088e-90	3.369e-89	4.45719e-86	3.80824e-86	1	-1	seq_var
GRMZM2G064537_T01	GRMZM2G064537	4	176377675	176381799	1876.64	796.659	0.424514	-1.23611	436.297	6.92392e-97	5.10302e-96	6.28692e-93	5.43459e-93	1	-1	seq_var	salt_up; uv_down
GRMZM2G064710_T01	GRMZM2G064710	9	140199021	140201503	273.252	0	0	-Inf	273.252	2.2195e-61	1.08408e-60	2.01531e-57	1.60292e-57	1	-1	seq_var
GRMZM2G065210_T05	GRMZM2G065210	9	141427437	141432024	358.273	34.0509	0.0950418	-3.39529	267.942	3.18826e-60	1.53496e-59	2.89494e-56	2.29395e-56	1	-1	seq_var
GRMZM2G065214_T03	GRMZM2G065214	1	283159558	283162339	870.655	410.771	0.471796	-1.08377	165.045	8.94226e-38	3.13255e-37	8.11957e-34	5.80263e-34	1	-1	seq_var	salt_up; uv_down
GRMZM2G065225_T01	GRMZM2G065225	4	42838175	42844549	11213.3	2010.15	0.179265	-2.47984	6405.13	0	0	0	0	1	-1	seq_var
GRMZM2G065276_T03	GRMZM2G065276	2	163595658	163616052	1018.5	36.3313	0.0356712	-4.8091	914.516	6.85927e-201	1.04325e-199	6.22822e-197	5.81941e-197	1	-1	seq_var
GRMZM2G065494_T01	GRMZM2G065494	4	238310811	238319374	4782.48	692.621	0.144825	-2.78762	3055.09	0	0	0	0	1	-1	seq_var
GRMZM2G065757_T01	GRMZM2G065757	6	165214021	165220621	5344.61	2314.89	0.433126	-1.20714	1198.41	1.35253e-262	2.84941e-261	1.22809e-258	1.16994e-258	1	-1	seq_var
GRMZM2G066485_T02	GRMZM2G066485	6	138879310	138901713	1008.01	497.61	0.493655	-1.01843	173.025	1.61615e-39	5.8488e-39	1.46746e-35	1.06213e-35	1	-1	seq_var
GRMZM2G066575_T01	GRMZM2G066575	6	152375762	152380749	1535.35	265.215	0.172739	-2.53333	895.967	7.38983e-197	1.09461e-195	6.70997e-193	6.25771e-193	1	-1	seq_var
GRMZM2G066636_T01	GRMZM2G066636	7	168240253	168242149	1498.27	579.133	0.386536	-1.37133	406.665	1.94999e-90	1.34221e-89	1.77059e-86	1.51358e-86	1	-1	seq_var
GRMZM2G066867_T01	GRMZM2G066867	5	18469442	18472522	1400.85	500.398	0.35721	-1.48516	426.466	9.55092e-95	6.93416e-94	8.67223e-91	7.47932e-91	1	-1	seq_var
GRMZM2G067315_T01	GRMZM2G067315	1	235968685	235970191	1409.59	614.543	0.435973	-1.19769	312.281	6.95595e-70	3.75282e-69	6.316e-66	5.14601e-66	1	-1	seq_var	salt_up
GRMZM2G067476_T03	GRMZM2G067476	3	127026956	127030070	524.549	0.908263	0.00173151	-9.17375	521.831	1.69152e-115	1.45998e-114	1.5359e-111	1.35812e-111	1	-1	seq_var
GRMZM2G067511_T01	GRMZM2G067511	3	38428315	38432905	571.175	261.441	0.457725	-1.12745	115.221	7.03813e-27	2.0509e-26	6.39062e-23	4.19824e-23	1	-1	seq_var
GRMZM2G067514_T01	GRMZM2G067514	2	173039978	173044426	468.835	82.4131	0.175783	-2.50814	270.88	7.29707e-61	3.53373e-60	6.62574e-57	5.25827e-57	1	-1	seq_var
GRMZM2G067546_T01	GRMZM2G067546	9	131423638	131431860	5597.52	1291.43	0.230715	-2.11582	2691.62	0	0	0	0	1	-1	seq_var
GRMZM2G067789_T01	GRMZM2G067789	5	45362879	45367052	1208.44	0.002596	2.14822e-06	-18.8284	1208.44	8.9563e-265	1.93627e-263	8.13232e-261	7.75705e-261	1	-1	seq_var	salt_up
GRMZM2G067853_T01	GRMZM2G067853	5	52146625	52168252	2935.72	407.83	0.13892	-2.84767	1911.2	0	0	0	0	1	-1	seq_var
GRMZM2G067985_T11	GRMZM2G067985	8	134062671	134065785	7064.75	2941.42	0.416351	-1.26413	1699.14	0	0	0	0	1	-1	seq_var
GRMZM2G068244_T01	GRMZM2G068244	1	293721545	293724059	3064.02	1313.24	0.428601	-1.22229	700.262	2.62199e-154	2.98342e-153	2.38077e-150	2.1718e-150	1	-1	seq_var	heat_up
GRMZM2G068259_T01	GRMZM2G068259	1	262219645	262230412	881.07	7.88335	0.00894747	-6.8043	857.7	1.5403e-188	2.16836e-187	1.39859e-184	1.2994e-184	1	-1	seq_var
GRMZM2G068392_T07	GRMZM2G068392	8	163058926	163061398	368.06	0	0	-Inf	368.06	4.95021e-82	3.09345e-81	4.49479e-78	3.77602e-78	1	-1	seq_var
GRMZM2G068575_T02	GRMZM2G068575	1	261178262	261192793	1031.25	293.696	0.284797	-1.81199	410.57	2.75454e-91	1.91364e-90	2.50113e-87	2.14138e-87	1	-1	seq_var
GRMZM2G068665_T01	GRMZM2G068665	3	150304513	150308434	627.246	181.723	0.289716	-1.78729	245.362	2.66403e-55	1.20826e-54	2.41894e-51	1.88587e-51	1	-1	seq_var	salt_up
GRMZM2G068947_T01	GRMZM2G068947	3	69859514	69861831	2248.76	445.948	0.198308	-2.33418	1206.12	2.85549e-264	6.10067e-263	2.59279e-260	2.47171e-260	1	-1	seq_var
GRMZM2G068959_T02	GRMZM2G068959	scaffold_507	497942	499530	659.498	258.054	0.391289	-1.35369	175.638	4.34422e-40	1.58926e-39	3.94455e-36	2.86675e-36	1	-1	seq_var
GRMZM2G068963_T01	GRMZM2G068963	5	11701201	11702385	6737.65	731.686	0.108597	-3.20295	4829.29	0	0	0	0	1	-1	seq_var
GRMZM2G068973_T01	GRMZM2G068973	8	170415625	170417408	1344.34	453.438	0.337294	-1.56792	441.493	5.12194e-98	3.80894e-97	4.65072e-94	4.02584e-94	1	-1	seq_var	cold_up; uv_up
GRMZM2G069024_T04	GRMZM2G069024	3	186543599	186547462	3562.64	955.13	0.268096	-1.89918	1504.97	0	0	0	0	1	-1	seq_var
GRMZM2G069102_T04	GRMZM2G069102	4	38054121	38059312	357.097	154.068	0.431444	-1.21275	80.6413	2.70642e-19	6.70696e-19	2.45743e-15	1.46607e-15	1	-1	seq_var
GRMZM2G069106_T01	GRMZM2G069106	8	170430974	170434856	1001.22	366.403	0.365955	-1.45026	294.67	4.77544e-66	2.45532e-65	4.3361e-62	3.49323e-62	1	-1	seq_var
GRMZM2G069542_T01	GRMZM2G069542	5	144847481	144855080	1398.74	380.447	0.271993	-1.87836	582.806	9.19744e-129	8.82799e-128	8.35128e-125	7.48212e-125	1	-1	seq_var	salt_up; uv_up
GRMZM2G069631_T01	GRMZM2G069631	4	230038361	230047912	1210.68	321.053	0.265184	-1.91494	516.696	2.21509e-114	1.88678e-113	2.0113e-110	1.7754e-110	1	-1	seq_var
GRMZM2G069676_T03	GRMZM2G069676	7	41746480	41810114	1671.85	91.6938	0.0548457	-4.18848	1415.84	0	0	6.89935e-306	6.63796e-306	1	-1	seq_var
GRMZM2G069765_T01	GRMZM2G069765	1	25379816	25386682	1639.08	0.000755	4.60626e-07	-21.0499	1639.07	0	0	0	0	1	-1	seq_var
GRMZM2G070011_T01	GRMZM2G070011	4	15320600	15322087	15316.8	7219.95	0.471375	-1.08505	2908.97	0	0	0	0	1	-1	seq_var
GRMZM2G070199_T01	GRMZM2G070199	6	147917149	147923413	3166.43	1249.08	0.394475	-1.342	832.576	4.4627e-183	6.03894e-182	4.05213e-179	3.75313e-179	1	-1	seq_var	heat_up; salt_up
GRMZM2G070218_T01	GRMZM2G070218	5	207754929	207757794	3349.24	1046.19	0.312367	-1.67869	1206.71	2.11832e-264	4.54714e-263	1.92344e-260	1.83405e-260	1	-1	seq_var
GRMZM2G070422_T03	GRMZM2G070422	4	54150068	54155006	325.061	35.535	0.109318	-3.1934	232.463	1.73082e-52	7.5412e-52	1.57159e-48	1.21106e-48	1	-1	seq_var
GRMZM2G070807_T01	GRMZM2G070807	7	9903065	9909646	1574.56	635.433	0.403561	-1.30914	399.081	8.73059e-89	5.91154e-88	7.92737e-85	6.75748e-85	1	-1	seq_var
GRMZM2G071015_T01	GRMZM2G071015	7	140438625	140447287	1728.98	694.062	0.401427	-1.31679	442.033	3.90895e-98	2.90928e-97	3.54932e-94	3.07282e-94	1	-1	seq_var
GRMZM2G071034_T01	GRMZM2G071034	2	3094658	3099169	957.719	306.556	0.32009	-1.64345	335.38	6.47288e-75	3.71046e-74	5.87738e-71	4.85272e-71	1	-1	seq_var
GRMZM2G071154_T02	GRMZM2G071154	3	226857237	226859450	2600.06	1075.28	0.41356	-1.27383	632.581	1.3726e-139	1.39722e-138	1.24632e-135	1.12402e-135	1	-1	seq_var	cold_up; salt_up
GRMZM2G071264_T01	GRMZM2G071264	10	128734307	128759170	137.632	64.9066	0.471594	-1.08438	26.1136	3.21909e-07	5.36514e-07	0.00292293	0.00116949	1	-1	seq_var
GRMZM2G071310_T01	GRMZM2G071310	2	5857184	5858371	133.474	48.0767	0.360196	-1.47315	40.1687	2.32952e-10	4.41587e-10	2.1152e-06	9.99596e-07	1	-1	seq_var
GRMZM2G071401_T01	GRMZM2G071401	7	83479901	83483918	285.421	99.8061	0.34968	-1.51589	89.4353	3.16833e-21	8.22426e-21	2.87685e-17	1.76888e-17	1	-1	seq_var	salt_on
GRMZM2G071448_T01	GRMZM2G071448	4	146558774	146564307	747.11	152.745	0.204448	-2.29019	392.585	2.26524e-87	1.51238e-86	2.05684e-83	1.74899e-83	1	-1	seq_var
GRMZM2G071450_T01	GRMZM2G071450	6	54372730	54374538	173762	84676	0.487311	-1.03709	30708.6	0	0	0	0	1	-1	seq_var
GRMZM2G071745_T01	GRMZM2G071745	5	6920391	6922073	252.929	71.3684	0.282168	-1.82537	101.648	6.63147e-24	1.82466e-23	6.02138e-20	3.83366e-20	1	-1	seq_var
GRMZM2G072264_T01	GRMZM2G072264	2	6197632	6202253	1353.1	611.127	0.451649	-1.14673	280.277	6.53553e-63	3.24987e-62	5.93426e-59	4.74153e-59	1	-1	seq_var
GRMZM2G072584_T01	GRMZM2G072584	1	292298809	292302768	2330.63	831.382	0.356719	-1.48714	710.861	1.29984e-156	1.5016e-155	1.18026e-152	1.07822e-152	1	-1	seq_var	cold_up
GRMZM2G072898_T03	GRMZM2G072898	1	261773040	261774367	1659.62	786.423	0.473856	-1.07748	311.719	9.22154e-70	4.96334e-69	8.37316e-66	6.81841e-66	1	-1	seq_var
GRMZM2G073312_T01	GRMZM2G073312	6	98164281	98178284	2930.89	1407.41	0.480199	-1.0583	534.999	2.30833e-118	2.0589e-117	2.09596e-114	1.86121e-114	1	-1	seq_var
GRMZM2G073351_T01	GRMZM2G073351	5	24880836	24884057	24153.7	1951.57	0.0807979	-3.62954	18882.6	0	0	0	0	1	-1	seq_var
GRMZM2G073399_T01	GRMZM2G073399	1	223088913	223099932	1211.08	310.199	0.256133	-1.96503	533.494	4.90788e-118	4.3647e-117	4.45635e-114	3.95575e-114	1	-1	seq_var
GRMZM2G073498_T01	GRMZM2G073498	9	147424711	147428844	551.777	187.862	0.340467	-1.55441	179.053	7.80298e-41	2.88129e-40	7.0851e-37	5.16713e-37	1	-1	seq_var
GRMZM2G073521_T01	GRMZM2G073521	6	3047563	3053320	2944.85	418.75	0.142197	-2.81403	1897.13	0	0	0	0	1	-1	seq_var
GRMZM2G073755_T02	GRMZM2G073755	1	57298546	57301158	1101.68	451.878	0.410172	-1.2857	271.79	4.62237e-61	2.25046e-60	4.19711e-57	3.3355e-57	1	-1	seq_var
GRMZM2G073842_T01	GRMZM2G073842	8	128449600	128451000	89.6318	26.1663	0.291931	-1.7763	34.7836	3.68469e-09	6.67804e-09	3.3457e-05	1.50004e-05	1	-1	seq_var	cold_up; salt_up; uv_up
GRMZM2G073892_T01	GRMZM2G073892	5	217591763	217592969	1317.28	631.135	0.479122	-1.06154	241.627	1.73804e-54	7.78945e-54	1.57814e-50	1.22619e-50	1	-1	seq_var
GRMZM2G074099_T01	GRMZM2G074099	5	168910837	168926688	2245.07	3.24517	0.00144546	-9.43426	2235.36	0	0	0	0	1	-1	seq_var
GRMZM2G074114_T01	GRMZM2G074114	1	191480086	191483144	1043.3	399.179	0.382613	-1.38604	287.622	1.6396e-64	8.31243e-64	1.48876e-60	1.19527e-60	1	-1	seq_var
GRMZM2G074238_T08	GRMZM2G074238	2	58274057	58277229	934.011	140.738	0.150682	-2.73042	585.515	2.36891e-129	2.28826e-128	2.15097e-125	1.92853e-125	1	-1	seq_var
GRMZM2G074252_T01	GRMZM2G074252	4	240187648	240188530	1316.15	603.281	0.458369	-1.12542	264.755	1.57802e-59	7.52541e-59	1.43284e-55	1.13254e-55	1	-1	seq_var
GRMZM2G074462_T01	GRMZM2G074462	8	166563001	166565165	917.082	301.002	0.328217	-1.60728	311.599	9.79062e-70	5.2634e-69	8.88988e-66	7.23723e-66	1	-1	seq_var	salt_up; uv_off
GRMZM2G075336_T01	GRMZM2G075336	4	172109718	172113857	3184.09	1097.62	0.344721	-1.5365	1016.73	4.14707e-223	7.19988e-222	3.76554e-219	3.54906e-219	1	-1	seq_var
GRMZM2G075348_T02	GRMZM2G075348	7	122149088	122164738	1432.94	103.453	0.0721963	-3.79193	1150.45	3.5886e-252	7.22494e-251	3.25845e-248	3.09696e-248	1	-1	seq_var
GRMZM2G075651_T01	GRMZM2G075651	8	72450044	72452810	2026.07	969.657	0.47859	-1.06314	372.535	5.25238e-83	3.32114e-82	4.76916e-79	4.01544e-79	1	-1	seq_var	cold_up; uv_down
GRMZM2G075744_T01	GRMZM2G075744	2	213473471	213474651	637.457	225.674	0.354023	-1.49809	196.453	1.24122e-44	4.86416e-44	1.12703e-40	8.3956e-41	1	-1	seq_var
GRMZM2G076602_T01	GRMZM2G076602	10	144777835	144780346	526.003	192.301	0.365588	-1.45171	155.028	1.38054e-35	4.6826e-35	1.25353e-31	8.84099e-32	1	-1	seq_var
GRMZM2G076798_T01	GRMZM2G076798	2	115715455	115715780	247.438	0	0	-Inf	247.438	9.39802e-56	4.28169e-55	8.5334e-52	6.66132e-52	1	-1	seq_var
GRMZM2G076844_T02	GRMZM2G076844	2	14809966	14810989	1127.98	0.000137	1.21456e-07	-22.9731	1127.98	2.74318e-247	5.36813e-246	2.49081e-243	2.3638e-243	1	-1	seq_var	cold_up; heat_down; salt_down; uv_down
GRMZM2G077181_T01	GRMZM2G077181	1	291025126	291029456	451.014	149.591	0.331677	-1.59215	151.274	9.13087e-35	3.0481e-34	8.29083e-31	5.80815e-31	1	-1	seq_var	cold_up; heat_up; salt_up
GRMZM2G077215_T01	GRMZM2G077215	2	220766387	220773610	958.172	290.162	0.302829	-1.72343	357.466	1.00295e-79	6.04299e-79	9.10678e-76	7.59634e-76	1	-1	seq_var
GRMZM2G077278_T01	GRMZM2G077278	6	159785916	159790437	3281.99	1025.53	0.312472	-1.6782	1182.03	4.91592e-259	1.0191e-257	4.46366e-255	4.24883e-255	1	-1	seq_var
GRMZM2G077295_T01	GRMZM2G077295	5	7783728	7787569	666.66	189.068	0.283605	-1.81805	266.55	6.40961e-60	3.06958e-59	5.81993e-56	4.60531e-56	1	-1	seq_var
GRMZM2G077607_T07	GRMZM2G077607	3	208692475	208697514	1157.09	559.959	0.483938	-1.04711	207.661	4.44919e-47	1.80593e-46	4.03987e-43	3.04503e-43	1	-1	seq_var
GRMZM2G077632_T01	GRMZM2G077632	2	216580868	216585087	965.563	301.987	0.312758	-1.67688	347.389	1.56954e-77	9.21828e-77	1.42515e-73	1.18265e-73	1	-1	seq_var	cold_up; salt_down
GRMZM2G077718_T01	GRMZM2G077718	2	186257701	186258592	558.071	54.4074	0.0974918	-3.35857	414.181	4.50754e-92	3.15562e-91	4.09284e-88	3.50867e-88	1	-1	seq_var
GRMZM2G077757_T01	GRMZM2G077757	1	144967722	144983399	3472.84	1572.09	0.452682	-1.14343	716.134	9.27316e-158	1.08088e-156	8.42003e-154	7.69858e-154	1	-1	seq_var
GRMZM2G077914_T03	GRMZM2G077914	8	9627211	9629741	681.692	335.096	0.491565	-1.02455	118.145	1.61141e-27	4.74589e-27	1.46316e-23	9.66522e-24	1	-1	seq_var
GRMZM2G078124_T01	GRMZM2G078124	2	193348716	193351302	60.481	2.5e-05	4.13353e-07	-21.2061	60.481	7.42935e-15	1.63694e-14	6.74585e-11	3.68496e-11	1	-1	seq_var
GRMZM2G078294_T01	GRMZM2G078294	5	148448399	148450961	311.012	4.75218	0.0152797	-6.03224	297.042	1.4531e-66	7.51376e-66	1.31942e-62	1.0644e-62	1	-1	seq_var
GRMZM2G078595_T01	GRMZM2G078595	7	17265401	17266521	406.435	35.6951	0.087825	-3.50923	310.877	1.4069e-69	7.53222e-69	1.27747e-65	1.039e-65	1	-1	seq_var
GRMZM2G078756_T01	GRMZM2G078756	3	200258553	200262717	6766.77	953.422	0.140898	-2.82728	4377.48	0	0	0	0	1	-1	seq_var
GRMZM2G079083_T01	GRMZM2G079083	5	15210355	15214606	259.824	43.313	0.166702	-2.58466	154.639	1.67875e-35	5.68558e-35	1.5243e-31	1.0744e-31	1	-1	seq_var
GRMZM2G079200_T03	GRMZM2G079200	6	103303663	103305338	871.453	287.25	0.329621	-1.60112	294.548	5.07713e-66	2.60896e-65	4.61004e-62	3.71341e-62	1	-1	seq_var	cold_up
GRMZM2G079428_T01	GRMZM2G079428	1	229910587	229926888	3442.13	721.52	0.209615	-2.25419	1777.7	0	0	0	0	1	-1	seq_var
GRMZM2G079470_T01	GRMZM2G079470	1	88488422	88491040	1267.56	434.629	0.342887	-1.54419	407.575	1.23596e-90	8.54071e-90	1.12225e-86	9.59968e-87	1	-1	seq_var
GRMZM2G079471_T02	GRMZM2G079471	4	195504059	195509138	846.338	149.405	0.176531	-2.50201	487.792	4.30689e-108	3.49478e-107	3.91065e-104	3.42914e-104	1	-1	seq_var
GRMZM2G079487_T02	GRMZM2G079487	1	88539372	88552169	725.043	249.419	0.344006	-1.5395	232.147	2.02829e-52	8.82882e-52	1.84169e-48	1.41879e-48	1	-1	seq_var
GRMZM2G079559_T01	GRMZM2G079559	4	17180598	17181618	1086.98	438.528	0.403436	-1.30959	275.641	6.69154e-62	3.27896e-61	6.07592e-58	4.83665e-58	1	-1	seq_var
GRMZM2G079777_T01	GRMZM2G079777	10	60152246	60163212	1867.59	565.695	0.302902	-1.72308	696.558	1.67568e-153	1.89009e-152	1.52152e-149	1.3868e-149	1	-1	seq_var
GRMZM2G079782_T01	GRMZM2G079782	5	215519860	215521041	8043.6	1560.85	0.194049	-2.36551	4375.68	0	0	0	0	1	-1	seq_var
GRMZM2G079913_T01	GRMZM2G079913	10	110608095	110610698	637.676	138.504	0.217201	-2.2029	321.025	8.66181e-72	4.79276e-71	7.86492e-68	6.44438e-68	1	-1	seq_var
GRMZM2G079957_T01	GRMZM2G079957	1	170553927	170555938	1037.77	84.5823	0.0815042	-3.61698	809.516	4.60465e-178	6.08591e-177	4.18102e-174	3.86514e-174	1	-1	seq_var
GRMZM2G080034_T02	GRMZM2G080034	1	288052409	288054607	905.618	311.02	0.343434	-1.5419	290.593	3.69237e-65	1.88352e-64	3.35267e-61	2.6958e-61	1	-1	seq_var
GRMZM2G080466_T02	GRMZM2G080466	2	190149388	190151097	529.957	66.1582	0.124837	-3.00188	360.852	1.83671e-80	1.11554e-79	1.66773e-76	1.39333e-76	1	-1	seq_var
GRMZM2G080487_T01	GRMZM2G080487	3	161935900	161937113	464.082	72.7357	0.15673	-2.67364	285.296	5.26771e-64	2.65432e-63	4.78308e-60	3.83436e-60	1	-1	seq_var
GRMZM2G080567_T01	GRMZM2G080567	7	165383137	165384037	1113.87	218.99	0.196603	-2.34664	600.82	1.11005e-132	1.08496e-131	1.00793e-128	9.04915e-129	1	-1	seq_var	cold_up; heat_up; salt_up; uv_down
GRMZM2G080775_T01	GRMZM2G080775	1	184024118	184036754	1932.08	912.97	0.472532	-1.08152	365.05	2.23846e-81	1.38738e-80	2.03252e-77	1.70481e-77	1	-1	seq_var
GRMZM2G081114_T01	GRMZM2G081114	1	294892538	294893344	35446.6	16711	0.47144	-1.08485	6730.08	0	0	0	0	1	-1	seq_var
GRMZM2G081188_T01	GRMZM2G081188	3	170163250	170168370	2504.54	781.263	0.311939	-1.68066	903.79	1.47193e-198	2.20546e-197	1.33651e-194	1.24746e-194	1	-1	seq_var	cold_up
GRMZM2G081192_T01	GRMZM2G081192	4	143891075	143894123	1332.89	514.534	0.386028	-1.37322	362.51	7.99969e-81	4.91456e-80	7.26372e-77	6.08216e-77	1	-1	seq_var
GRMZM2G081239_T01	GRMZM2G081239	9	4504176	4507865	487.544	234.254	0.480477	-1.05746	88.8836	4.18741e-21	1.08293e-20	3.80217e-17	2.33239e-17	1	-1	seq_var
GRMZM2G081268_T01	GRMZM2G081268	5	132544170	132546408	12550	3841.5	0.306095	-1.70795	4626.66	0	0	0	0	1	-1	seq_var
GRMZM2G081529_T01	GRMZM2G081529	2	188530927	188531741	1596.99	516.934	0.323694	-1.6273	551.825	5.04745e-122	4.62938e-121	4.58308e-118	4.08389e-118	1	-1	seq_var
GRMZM2G081577_T01	GRMZM2G081577	4	29821216	29823740	943.573	274.589	0.29101	-1.78086	367.389	6.92878e-82	4.32097e-81	6.29133e-78	5.2832e-78	1	-1	seq_var
GRMZM2G081622_T01	GRMZM2G081622	9	148317052	148319976	412.359	171.278	0.415361	-1.26756	99.5826	1.88151e-23	5.13344e-23	1.70841e-19	1.08243e-19	1	-1	seq_var
GRMZM2G081642_T03	GRMZM2G081642	5	119712981	119765262	860.122	44.6963	0.0519651	-4.26631	734.865	7.84212e-162	9.45637e-161	7.12064e-158	6.53092e-158	1	-1	seq_var
GRMZM2G081919_T01	GRMZM2G081919	3	180868369	180880014	1497.87	459.312	0.306643	-1.70537	551.101	7.25351e-122	6.646e-121	6.58619e-118	5.86809e-118	1	-1	seq_var
GRMZM2G082174_T01	GRMZM2G082174	1	213702204	213711167	2758.31	1091.46	0.395699	-1.33752	721.702	5.70842e-159	6.74024e-158	5.18325e-155	4.74484e-155	1	-1	seq_var
GRMZM2G082184_T02	GRMZM2G082184	4	182093907	182096555	89.8481	0	0	-Inf	89.8481	2.57164e-21	6.69644e-21	2.33505e-17	1.43857e-17	1	-1	seq_var	salt_up; uv_off
GRMZM2G082185_T01	GRMZM2G082185	8	6465005	6468479	12197.5	3212.79	0.263398	-1.92468	5238.35	0	0	0	0	1	-1	seq_var
GRMZM2G082198_T02	GRMZM2G082198	9	6307757	6313260	1222.1	424.159	0.347074	-1.52668	386.761	4.19783e-86	2.75806e-85	3.81163e-82	3.23191e-82	1	-1	seq_var
GRMZM2G082608_T01	GRMZM2G082608	3	159212536	159213062	570.08	54.8896	0.0962841	-3.37656	424.694	2.32136e-94	1.67685e-93	2.1078e-90	1.81623e-90	1	-1	seq_var
GRMZM2G083016_T01	GRMZM2G083016	8	120300948	120305946	28893.4	13043.6	0.451438	-1.1474	5990.34	0	0	0	0	1	-1	seq_var
GRMZM2G083195_T01	GRMZM2G083195	3	178232720	178236298	912.23	320.142	0.350944	-1.51069	284.467	7.9852e-64	4.01249e-63	7.25057e-60	5.80844e-60	1	-1	seq_var
GRMZM2G083253_T03	GRMZM2G083253	2	32272862	32274814	447.56	156.068	0.348708	-1.51991	140.762	1.81404e-32	5.83887e-32	1.64715e-28	1.13559e-28	1	-1	seq_var
GRMZM2G083788_T01	GRMZM2G083788	5	212916277	212921831	889.29	191.369	0.215193	-2.2163	450.738	4.9826e-100	3.76077e-99	4.5242e-96	3.92529e-96	1	-1	seq_var	salt_up
GRMZM2G083812_T01	GRMZM2G083812	5	214215143	214218800	553.249	12.4761	0.0225505	-5.47069	516.921	1.97869e-114	1.68858e-113	1.79665e-110	1.58631e-110	1	-1	seq_var
GRMZM2G083875_T01	GRMZM2G083875	8	62938204	62941327	51.5771	0	0	-Inf	51.5771	6.88384e-13	1.42251e-12	6.25053e-09	3.22646e-09	1	-1	seq_var
GRMZM2G083894_T01	GRMZM2G083894	7	132664460	132666065	2682.12	1129.58	0.421153	-1.24758	632.36	1.53265e-139	1.55492e-138	1.39165e-135	1.25463e-135	1	-1	seq_var	cold_up; heat_up; salt_up
GRMZM2G084062_T01	GRMZM2G084062	2	20226461	20272117	1470.89	41.0581	0.0279138	-5.16288	1352.18	5.18762e-296	1.29051e-294	4.71036e-292	4.52153e-292	1	-1	seq_var
GRMZM2G084859_T01	GRMZM2G084859	9	145248876	145249788	443.18	85.1808	0.192204	-2.37929	242.568	1.08343e-54	4.88215e-54	9.83753e-51	7.6555e-51	1	-1	seq_var
GRMZM2G085254_T01	GRMZM2G085254	8	14289509	14295246	2310.29	615.283	0.266323	-1.90875	982.048	1.43392e-215	2.38025e-214	1.302e-211	1.22371e-211	1	-1	seq_var
GRMZM2G085467_T02	GRMZM2G085467	7	132922740	132925252	730.689	201.383	0.275607	-1.85931	300.582	2.45978e-67	1.28731e-66	2.23348e-63	1.80695e-63	1	-1	seq_var
GRMZM2G085750_T01	GRMZM2G085750	4	229708905	229712933	644.431	318.924	0.494892	-1.01481	109.985	9.87252e-26	2.81806e-25	8.96425e-22	5.82479e-22	1	-1	seq_var
GRMZM2G085854_T01	GRMZM2G085854	4	3270661	3272696	848.855	223.654	0.263477	-1.92425	364.451	3.02297e-81	1.87107e-80	2.74486e-77	2.30169e-77	1	-1	seq_var	cold_down; salt_up; uv_down
GRMZM2G085945_T02	GRMZM2G085945	5	211598764	211600154	722.125	356.598	0.493817	-1.01795	123.86	9.04174e-29	2.72573e-28	8.2099e-25	5.48743e-25	1	-1	seq_var
GRMZM2G086088_T03	GRMZM2G086088	8	147738334	147741180	2522.01	1196.68	0.474495	-1.07553	472.342	9.91197e-105	7.82615e-104	9.00007e-101	7.86118e-101	1	-1	seq_var
GRMZM2G086116_T01	GRMZM2G086116	5	23911335	23916254	1084.28	393.709	0.363105	-1.46154	322.663	3.80851e-72	2.12155e-71	3.45813e-68	2.83772e-68	1	-1	seq_var
GRMZM2G086464_T02	GRMZM2G086464	8	106381520	106384508	14261.2	3719.36	0.260803	-1.93897	6180.58	0	0	0	0	1	-1	seq_var
GRMZM2G086497_T01	GRMZM2G086497	5	6826284	6830004	1420.19	704.884	0.49633	-1.01063	240.776	2.66377e-54	1.19148e-53	2.4187e-50	1.87822e-50	1	-1	seq_var
GRMZM2G086920_T01	GRMZM2G086920	2	4702643	4706609	1006.32	379.579	0.377195	-1.40662	283.431	1.34285e-63	6.72908e-63	1.21931e-59	9.76119e-60	1	-1	seq_var
GRMZM2G087201_T01	GRMZM2G087201	2	3863809	3868484	889.323	130.892	0.147182	-2.76433	563.819	1.24135e-124	1.16201e-123	1.12715e-120	1.00686e-120	1	-1	seq_var
GRMZM2G087459_T03	GRMZM2G087459	1	40426225	40429278	1471.96	475.727	0.323193	-1.62953	509.57	7.86563e-113	6.63138e-112	7.14199e-109	6.29565e-109	1	-1	seq_var
GRMZM2G087901_T01	GRMZM2G087901	9	151514437	151518716	969.458	171.928	0.177345	-2.49537	557.264	3.30984e-123	3.06042e-122	3.00534e-119	2.68064e-119	1	-1	seq_var
GRMZM2G088088_T01	GRMZM2G088088	8	82956568	82961691	4949.55	2450.38	0.495072	-1.01429	844.04	1.43677e-185	1.99173e-184	1.30458e-181	1.21062e-181	1	-1	seq_var
GRMZM2G088469_T01	GRMZM2G088469	7	17190977	17193109	1302.2	343.638	0.26389	-1.92199	558.283	1.98631e-123	1.84038e-122	1.80357e-119	1.60911e-119	1	-1	seq_var	cold_down; salt_up; uv_down
GRMZM2G088601_T03	GRMZM2G088601	2	18525892	18529441	3398.63	873.397	0.256985	-1.96025	1492.69	0	0	0	0	1	-1	seq_var	cold_up; salt_up; uv_down
GRMZM2G088843_T01	GRMZM2G088843	1	29741944	29744117	165.823	10.0994	0.0609046	-4.03731	137.844	7.88192e-32	2.505e-31	7.15679e-28	4.90571e-28	1	-1	seq_var
GRMZM2G089282_T01	GRMZM2G089282	2	9590701	9592247	483.522	221.333	0.457752	-1.12736	97.528	5.30994e-23	1.43324e-22	4.82143e-19	3.0357e-19	1	-1	seq_var
GRMZM2G089448_T01	GRMZM2G089448	5	4918380	4920036	914.515	287.246	0.314096	-1.67072	327.409	3.52549e-73	1.98705e-72	3.20114e-69	2.63354e-69	1	-1	seq_var
GRMZM2G089528_T01	GRMZM2G089528	1	207318413	207320890	2476.39	1056.24	0.426522	-1.22931	570.92	3.54167e-126	3.35683e-125	3.21584e-122	2.8769e-122	1	-1	seq_var
GRMZM2G089743_T02	GRMZM2G089743	3	43646012	43657336	642.833	269.073	0.418574	-1.25645	153.192	3.47832e-35	1.17061e-34	3.15831e-31	2.22021e-31	1	-1	seq_var
GRMZM2G089952_T01	GRMZM2G089952	3	156978780	156981628	521.162	112.012	0.214928	-2.21808	264.388	1.89724e-59	9.0288e-59	1.7227e-55	1.36089e-55	1	-1	seq_var	salt_up; uv_off
GRMZM2G089974_T01	GRMZM2G089974	5	11466057	11467632	1924.09	825.034	0.428791	-1.22165	439.386	1.47243e-97	1.0914e-96	1.33697e-93	1.15674e-93	1	-1	seq_var	cold_up; uv_down
GRMZM2G090177_T01	GRMZM2G090177	1	202802224	202803499	1446.35	288.282	0.199317	-2.32686	773.142	3.72824e-170	4.73461e-169	3.38525e-166	3.11905e-166	1	-1	seq_var	cold_up; heat_up
GRMZM2G090271_T01	GRMZM2G090271	2	13601510	13603670	8671.08	2956.39	0.340948	-1.55238	2808.67	0	0	0	0	1	-1	seq_var
GRMZM2G090609_T02	GRMZM2G090609	5	205211428	205213552	1004.97	444.358	0.442162	-1.17735	216.848	4.40597e-49	1.83515e-48	4.00062e-45	3.04056e-45	1	-1	seq_var
GRMZM2G090619_T01	GRMZM2G090619	3	218882465	218890229	265.66	85.3919	0.321433	-1.63741	92.5693	6.50087e-22	1.71344e-21	5.90279e-18	3.66389e-18	1	-1	seq_var
GRMZM2G090887_T01	GRMZM2G090887	1	113883585	113889208	1346.92	366.037	0.271758	-1.8796	561.68	3.62406e-124	3.38196e-123	3.29065e-120	2.93839e-120	1	-1	seq_var
GRMZM2G091155_T02	GRMZM2G091155	4	81728938	81732549	21189.2	9017.83	0.425585	-1.23248	4904.26	0	0	0	0	1	-1	seq_var
GRMZM2G091258_T03	GRMZM2G091258	4	191036913	191041319	4323.44	1860.74	0.430384	-1.21631	980.713	2.79602e-215	4.61598e-214	2.53879e-211	2.38529e-211	1	-1	seq_var
GRMZM2G091265_T02	GRMZM2G091265	7	105935513	105940065	832.966	83.6004	0.100365	-3.31668	612.666	2.94403e-135	2.90248e-134	2.67318e-131	2.40233e-131	1	-1	seq_var
GRMZM2G091845_T01	GRMZM2G091845	3	173628868	173633825	1098.61	417.922	0.38041	-1.39437	305.524	2.06249e-68	1.09134e-67	1.87274e-64	1.51902e-64	1	-1	seq_var
GRMZM2G091857_T01	GRMZM2G091857	2	175208055	175209178	670.629	240.978	0.359331	-1.47662	202.5	5.94717e-46	2.38307e-45	5.40003e-42	4.05299e-42	1	-1	seq_var
GRMZM2G092256_T01	GRMZM2G092256	9	84248689	84262621	3509.78	1751.23	0.498958	-1.00301	587.813	7.49292e-130	7.26101e-129	6.80357e-126	6.10223e-126	1	-1	seq_var
GRMZM2G092743_T01	GRMZM2G092743	5	179976462	179977264	191.521	66.2301	0.345811	-1.53194	60.903	5.99566e-15	1.3262e-14	5.44406e-11	2.98344e-11	1	-1	seq_var
GRMZM2G092747_T01	GRMZM2G092747	10	120028820	120030228	272.405	40.0935	0.147184	-2.76431	172.7	1.90296e-39	6.88126e-39	1.72789e-35	1.25024e-35	1	-1	seq_var
GRMZM2G092752_T03	GRMZM2G092752	7	162362193	162363812	585.2	135.641	0.231785	-2.10914	280.373	6.22826e-63	3.10217e-62	5.65526e-59	4.52047e-59	1	-1	seq_var
GRMZM2G092877_T01	GRMZM2G092877	2	214007460	214009595	1113.32	382.197	0.343296	-1.54247	357.425	1.02376e-79	6.16018e-79	9.29571e-76	7.75188e-76	1	-1	seq_var
GRMZM2G093254_T01	GRMZM2G093254	9	145772030	145777575	886.878	417.401	0.47064	-1.0873	168.99	1.2299e-38	4.38974e-38	1.11675e-34	8.03987e-35	1	-1	seq_var
GRMZM2G093286_T01	GRMZM2G093286	1	7709432	7711889	1173.67	281.468	0.23982	-2.05998	547.04	5.54471e-121	5.05482e-120	5.0346e-117	4.4829e-117	1	-1	seq_var
GRMZM2G093316_T01	GRMZM2G093316	4	153658717	153668308	1957.28	640.061	0.327016	-1.61257	668.016	2.69781e-147	2.90928e-146	2.44961e-143	2.22273e-143	1	-1	seq_var
GRMZM2G093346_T01	GRMZM2G093346	6	162105624	162108069	193.621	0.000678	3.50168e-06	-18.1235	193.619	5.1567e-44	2.00355e-43	4.68229e-40	3.47768e-40	1	-1	seq_var	salt_up
GRMZM2G093347_T01	GRMZM2G093347	3	113490913	113498209	1156.9	393.628	0.340243	-1.55536	375.734	1.05597e-83	6.75225e-83	9.5882e-80	8.08978e-80	1	-1	seq_var
GRMZM2G093535_T01	GRMZM2G093535	3	198802847	198804792	635.858	284.951	0.448136	-1.15799	133.726	6.27294e-31	1.96611e-30	5.69583e-27	3.87919e-27	1	-1	seq_var
GRMZM2G093557_T01	GRMZM2G093557	2	37220319	37223559	662.453	100.836	0.152216	-2.71581	413.229	7.26422e-92	5.06988e-91	6.59591e-88	5.65156e-88	1	-1	seq_var
GRMZM2G093895_T01	GRMZM2G093895	10	10294382	10296488	254.417	103.823	0.408083	-1.29306	63.3051	1.77047e-15	3.96936e-15	1.60759e-11	8.90726e-12	1	-1	seq_var
GRMZM2G094165_T05	GRMZM2G094165	8	146088852	146092183	12223.7	3511.49	0.28727	-1.79952	4823.72	0	0	0	0	1	-1	seq_var
GRMZM2G095020_T01	GRMZM2G095020	1	84614513	84620113	736.841	120.336	0.163313	-2.61429	443.407	1.96272e-98	1.46198e-97	1.78215e-94	1.54309e-94	1	-1	seq_var
GRMZM2G095185_T01	GRMZM2G095185	5	6531692	6536581	1021.12	370.8	0.363131	-1.46144	303.836	4.80996e-68	2.53626e-67	4.36745e-64	3.53965e-64	1	-1	seq_var
GRMZM2G095333_T01	GRMZM2G095333	9	109326184	109327626	5544.35	2501.89	0.45125	-1.148	1150.42	3.63196e-252	7.29606e-251	3.29782e-248	3.13402e-248	1	-1	seq_var
GRMZM2G095397_T01	GRMZM2G095397	4	126369233	126371337	50.2927	0.124621	0.00247791	-8.65666	49.9201	1.60135e-12	3.26895e-12	1.45403e-08	7.41906e-09	1	-1	seq_var
GRMZM2G095868_T03	GRMZM2G095868	9	138870972	138882725	181.713	69.3227	0.381496	-1.39026	50.3177	1.30764e-12	2.67962e-12	1.18734e-08	6.08053e-09	1	-1	seq_var
GRMZM2G095968_T01	GRMZM2G095968	1	7353116	7355434	610.277	218.424	0.35791	-1.48233	185.289	3.39471e-42	1.28006e-41	3.08239e-38	2.26529e-38	1	-1	seq_var	heat_down; salt_up
GRMZM2G096240_T01	GRMZM2G096240	3	11901107	11904525	588.395	272.818	0.463664	-1.10885	115.638	5.70357e-27	1.66362e-26	5.17884e-23	3.40389e-23	1	-1	seq_var
GRMZM2G096303_T02	GRMZM2G096303	1	222204352	222208204	353.069	87.8818	0.248908	-2.00631	159.483	1.46725e-36	5.03501e-36	1.33226e-32	9.44175e-33	1	-1	seq_var
GRMZM2G096343_T01	GRMZM2G096343	4	170036780	170046677	1042.9	376.259	0.36078	-1.47081	313.152	4.49253e-70	2.431e-69	4.07921e-66	3.32582e-66	1	-1	seq_var
GRMZM2G096355_T01	GRMZM2G096355	9	149325810	149328973	724.078	357.508	0.493742	-1.01817	124.238	7.47381e-29	2.25531e-28	6.78622e-25	4.5381e-25	1	-1	seq_var
GRMZM2G096695_T02	GRMZM2G096695	10	119842790	119843792	32450.3	4100.18	0.126352	-2.98447	21989.6	0	0	0	0	1	-1	seq_var
GRMZM2G096802_T01	GRMZM2G096802	3	177191659	177197420	413.014	175.802	0.425657	-1.23224	95.5636	1.43212e-22	3.82687e-22	1.30037e-18	8.13876e-19	1	-1	seq_var
GRMZM2G097504_T01	GRMZM2G097504	10	120674959	120678223	1882.72	576.239	0.306067	-1.70808	694.155	5.58171e-153	6.28028e-152	5.06819e-149	4.6183e-149	1	-1	seq_var
GRMZM2G097789_T01	GRMZM2G097789	3	174098859	174099605	126.654	10.3113	0.0814132	-3.61859	98.8249	2.7585e-23	7.49467e-23	2.50472e-19	1.5831e-19	1	-1	seq_var
GRMZM2G097959_T01	GRMZM2G097959	3	2444695	2450932	3552.8	1717.4	0.483392	-1.04874	639.202	4.98181e-141	5.12866e-140	4.52348e-137	4.08458e-137	1	-1	seq_var
GRMZM2G097972_T01	GRMZM2G097972	3	145306659	145307318	92.6966	33.6036	0.362512	-1.4639	27.6482	1.45506e-07	2.46537e-07	0.00132119	0.000541573	1	-1	seq_var
GRMZM2G098335_T01	GRMZM2G098335	3	12031159	12039337	585.795	169.753	0.289782	-1.78696	229.093	9.39882e-52	4.05229e-51	8.53412e-48	6.55567e-48	1	-1	seq_var
GRMZM2G098370_T01	GRMZM2G098370	5	70069546	70073937	994.008	126.897	0.127662	-2.9696	670.781	6.75594e-148	7.30285e-147	6.13439e-144	5.56757e-144	1	-1	seq_var
GRMZM2G098596_T01	GRMZM2G098596	10	1542108	1543169	304.616	43.6839	0.143406	-2.80182	195.48	2.02455e-44	7.91005e-44	1.83829e-40	1.36799e-40	1	-1	seq_var	cold_up
GRMZM2G098622_T02	GRMZM2G098622	2	166757446	166780354	247.171	25.2011	0.101958	-3.29395	180.895	3.0911e-41	1.14982e-40	2.80672e-37	2.05249e-37	1	-1	seq_var
GRMZM2G099080_T02	GRMZM2G099080	3	183899083	183917140	868.388	253.583	0.292016	-1.77588	336.894	3.02885e-75	1.74284e-74	2.75019e-71	2.27254e-71	1	-1	seq_var
GRMZM2G099285_T01	GRMZM2G099285	2	206612037	206614266	892.01	291.661	0.32697	-1.61277	304.493	3.45911e-68	1.82715e-67	3.14087e-64	2.5466e-64	1	-1	seq_var
GRMZM2G099328_T04	GRMZM2G099328	1	167019236	167024877	2896.73	690.672	0.238431	-2.06835	1356.61	5.64462e-297	1.40805e-295	5.12532e-293	4.92042e-293	1	-1	seq_var	cold_up
GRMZM2G099449_T01	GRMZM2G099449	5	4309356	4312212	355.972	163.512	0.45934	-1.12237	71.3031	3.06357e-17	7.20841e-17	2.78172e-13	1.5998e-13	1	-1	seq_var
GRMZM2G099598_T01	GRMZM2G099598	1	7391605	7396327	558.357	202.478	0.362631	-1.46342	166.462	4.3849e-38	1.54441e-37	3.98149e-34	2.8515e-34	1	-1	seq_var
GRMZM2G099666_T01	GRMZM2G099666	4	6408533	6413612	1810.51	874.058	0.482767	-1.0506	326.664	5.12261e-73	2.87474e-72	4.65133e-69	3.823e-69	1	-1	seq_var
GRMZM2G099696_T02	GRMZM2G099696	10	108139878	108147684	1135.06	361.636	0.318605	-1.65016	399.671	6.4945e-89	4.40404e-88	5.89701e-85	5.02804e-85	1	-1	seq_var
GRMZM2G099780_T01	GRMZM2G099780	2	193248741	193255761	905.913	3.7e-05	4.08428e-08	-24.5453	905.913	5.08746e-199	7.66072e-198	4.61942e-195	4.31315e-195	1	-1	seq_var
GRMZM2G099980_T03	GRMZM2G099980	3	229277962	229282108	747.909	167.024	0.223321	-2.16281	368.8	3.41531e-82	2.14017e-81	3.1011e-78	2.60656e-78	1	-1	seq_var
GRMZM2G099984_T01	GRMZM2G099984	8	853213	853915	1541.55	767.316	0.497756	-1.00649	259.624	2.0721e-58	9.71833e-58	1.88147e-54	1.48052e-54	1	-1	seq_var
GRMZM2G100146_T01	GRMZM2G100146	8	135663882	135666488	615.216	264.23	0.429491	-1.2193	140.079	2.55851e-32	8.21182e-32	2.32312e-28	1.59958e-28	1	-1	seq_var
GRMZM2G100568_T01	GRMZM2G100568	6	17486383	17491675	719.757	115.859	0.16097	-2.63514	436.435	6.46072e-97	4.7655e-96	5.86634e-93	5.07167e-93	1	-1	seq_var
GRMZM2G100719_T01	GRMZM2G100719	6	93423506	93424080	616.587	185.28	0.300492	-1.7346	231.991	2.19324e-52	9.53765e-52	1.99146e-48	1.53373e-48	1	-1	seq_var
GRMZM2G100913_T02	GRMZM2G100913	4	194173177	194189344	3428.17	1643.43	0.479389	-1.06073	628.068	1.31525e-138	1.324e-137	1.19425e-134	1.07575e-134	1	-1	seq_var
GRMZM2G100976_T01	GRMZM2G100976	6	88729231	88730546	2466.23	547.791	0.222117	-2.17061	1221.09	1.59017e-267	3.48761e-266	1.44387e-263	1.3782e-263	1	-1	seq_var
GRMZM2G100988_T01	GRMZM2G100988	9	142729458	142730475	1263.92	532.364	0.421203	-1.24741	297.93	9.3041e-67	4.8275e-66	8.44812e-63	6.82084e-63	1	-1	seq_var	cold_down; salt_up; uv_down
GRMZM2G101020_T01	GRMZM2G101020	3	141387560	141390705	1354.08	642.623	0.474584	-1.07526	253.501	4.47887e-57	2.07279e-56	4.06681e-53	3.18851e-53	1	-1	seq_var
GRMZM2G101024_T01	GRMZM2G101024	7	12253860	12254856	1065.16	169.467	0.1591	-2.652	649.805	2.46353e-143	2.57409e-142	2.23689e-139	2.02305e-139	1	-1	seq_var	cold_up; uv_down
GRMZM2G101116_T02	GRMZM2G101116	1	220837876	220841134	331.211	132.708	0.400674	-1.3195	84.9361	3.08158e-20	7.80932e-20	2.79808e-16	1.69426e-16	1	-1	seq_var
GRMZM2G101518_T01	GRMZM2G101518	4	180661015	180664967	639.062	294.163	0.460304	-1.11934	127.467	1.46813e-29	4.48992e-29	1.33306e-25	8.97318e-26	1	-1	seq_var	cold_up
GRMZM2G101875_T01	GRMZM2G101875	10	85201886	85207308	587.572	135.149	0.230013	-2.12021	283.216	1.49521e-63	7.48844e-63	1.35765e-59	1.08672e-59	1	-1	seq_var
GRMZM2G101958_T01	GRMZM2G101958	10	4168397	4169548	5942.81	2582.01	0.434476	-1.20265	1324.95	4.27684e-290	1.04112e-288	3.88337e-286	3.72427e-286	1	-1	seq_var
GRMZM2G102167_T02	GRMZM2G102167	7	175347728	175350980	1031.34	346.064	0.335549	-1.57541	340.932	3.99787e-76	2.3225e-75	3.63007e-72	3.0056e-72	1	-1	seq_var	salt_up
GRMZM2G102230_T02	GRMZM2G102230	4	171718132	171721643	163.292	16.2556	0.0995489	-3.32845	120.412	5.13876e-28	1.52583e-27	4.66599e-24	3.09507e-24	1	-1	seq_var
GRMZM2G102421_T01	GRMZM2G102421	6	87441864	87448084	5070.33	2303.72	0.454352	-1.13812	1037.99	9.93932e-228	1.77655e-226	9.0249e-224	8.52098e-224	1	-1	seq_var
GRMZM2G102601_T01	GRMZM2G102601	5	12230588	12235844	1067.44	268.365	0.251411	-1.99188	478.003	5.81111e-106	4.63663e-105	5.27649e-102	4.61576e-102	1	-1	seq_var
GRMZM2G102616_T01	GRMZM2G102616	5	12237483	12238175	107.899	0	0	-Inf	107.899	2.82898e-25	8.00722e-25	2.56872e-21	1.66146e-21	1	-1	seq_var
GRMZM2G102786_T02	GRMZM2G102786	7	166707856	166709403	455.551	165.357	0.362982	-1.46203	135.628	2.40606e-31	7.58313e-31	2.1847e-27	1.49175e-27	1	-1	seq_var
GRMZM2G102802_T01	GRMZM2G102802	9	147897812	147899235	282.678	115.74	0.409441	-1.28827	69.9473	6.09092e-17	1.41991e-16	5.53056e-13	3.15875e-13	1	-1	seq_var	cold_up; salt_up; uv_down
GRMZM2G102829_T01	GRMZM2G102829	2	163100314	163106027	8391.45	2180.18	0.25981	-1.94447	3649.37	0	0	0	0	1	-1	seq_var
GRMZM2G103119_T01	GRMZM2G103119	9	144700451	144704984	939.643	207.22	0.22053	-2.18095	467.749	9.89934e-104	7.72217e-103	8.9886e-100	7.83731e-100	1	-1	seq_var
GRMZM2G103266_T08	GRMZM2G103266	6	81850543	81856883	1124.11	403.442	0.358899	-1.47835	339.998	6.38777e-76	3.70613e-75	5.80009e-72	4.80105e-72	1	-1	seq_var
GRMZM2G103526_T01	GRMZM2G103526	6	104924155	104929073	352.993	40.0033	0.113326	-3.14145	249.271	3.74473e-56	1.71382e-55	3.40022e-52	2.65764e-52	1	-1	seq_var
GRMZM2G103896_T01	GRMZM2G103896	7	147744881	147754759	1626.58	326.667	0.200831	-2.31595	865.106	3.77959e-190	5.37069e-189	3.43187e-186	3.19073e-186	1	-1	seq_var
GRMZM2G104017_T03	GRMZM2G104017	6	41346514	41349382	5010.26	1453.81	0.290167	-1.78505	1956.71	0	0	0	0	1	-1	seq_var
GRMZM2G104226_T01	GRMZM2G104226	3	214143658	214147325	1980.17	0	0	-Inf	1980.17	0	0	0	0	1	-1	seq_var
GRMZM2G104316_T01	GRMZM2G104316	5	9812425	9818002	634.791	35.5415	0.0559893	-4.15871	535.704	1.62155e-118	1.45204e-117	1.47237e-114	1.3081e-114	1	-1	seq_var
GRMZM2G104325_T01	GRMZM2G104325	7	14468797	14474919	19258.1	8814.45	0.4577	-1.12753	3885.3	0	0	0	0	1	-1	seq_var
GRMZM2G104505_T01	GRMZM2G104505	7	15428591	15431114	832.749	402.476	0.483309	-1.04898	149.88	1.84156e-34	6.12056e-34	1.67214e-30	1.16921e-30	1	-1	seq_var
GRMZM2G104783_T01	GRMZM2G104783	4	216113549	216116085	1121.35	356.687	0.318086	-1.65251	395.6	4.99729e-88	3.35369e-87	4.53754e-84	3.86191e-84	1	-1	seq_var
GRMZM2G104955_T01	GRMZM2G104955	6	158314804	158321311	819.042	313.208	0.382408	-1.38682	225.982	4.48411e-51	1.91874e-50	4.07157e-47	3.12049e-47	1	-1	seq_var
GRMZM2G105362_T02	GRMZM2G105362	1	36977518	36979390	473.838	174.955	0.369231	-1.43741	137.687	8.53038e-32	2.70825e-31	7.74559e-28	5.30675e-28	1	-1	seq_var
GRMZM2G105523_T02	GRMZM2G105523	9	127685852	127688006	3012.7	650.054	0.215771	-2.21242	1524.01	0	0	0	0	1	-1	seq_var
GRMZM2G105827_T01	GRMZM2G105827	3	196004877	196007906	3765.53	1298.53	0.344846	-1.53597	1201.82	2.45262e-263	5.1911e-262	2.22698e-259	2.12201e-259	1	-1	seq_var
GRMZM2G106061_T01	GRMZM2G106061	5	180683064	180685070	43179.5	4866.41	0.112702	-3.14942	30551.9	0	0	0	0	1	-1	seq_var
GRMZM2G106133_T02	GRMZM2G106133	1	215379973	215381456	369.949	146.768	0.396725	-1.33379	96.3966	9.40273e-23	2.52445e-22	8.53768e-19	5.35862e-19	1	-1	seq_var
GRMZM2G106190_T01	GRMZM2G106190	6	149669180	149670872	1297.34	258.355	0.199142	-2.32813	693.895	6.35675e-153	7.14348e-152	5.77193e-149	5.25894e-149	1	-1	seq_var
GRMZM2G106413_T01	GRMZM2G106413	2	6980501	6981214	241.32	46.3394	0.192025	-2.38064	132.161	1.37939e-30	4.30111e-30	1.25248e-26	8.50944e-27	1	-1	seq_var
GRMZM2G106574_T01	GRMZM2G106574	1	210806880	210836742	1114.98	526.786	0.472463	-1.08173	210.73	9.51689e-48	3.89776e-47	8.64133e-44	6.53239e-44	1	-1	seq_var
GRMZM2G107609_T01	GRMZM2G107609	9	22335001	22338778	1836.91	333.727	0.181679	-2.46054	1040.96	2.24085e-228	4.02113e-227	2.03469e-224	1.92153e-224	1	-1	seq_var	heat_up; salt_up
GRMZM2G107620_T01	GRMZM2G107620	10	146679227	146681804	392.568	153.796	0.391769	-1.35193	104.348	1.69713e-24	4.72696e-24	1.54099e-20	9.87897e-21	1	-1	seq_var
GRMZM2G107696_T01	GRMZM2G107696	8	18216431	18229687	889.165	419.767	0.472091	-1.08286	168.332	1.71228e-38	6.09227e-38	1.55475e-34	1.11795e-34	1	-1	seq_var
GRMZM2G107757_T02	GRMZM2G107757	8	143211095	143216363	3328.78	1507.86	0.452978	-1.14249	685.545	4.1595e-151	4.6228e-150	3.77683e-147	3.43741e-147	1	-1	seq_var
GRMZM2G107815_T01	GRMZM2G107815	1	25409169	25413691	669.482	289.5	0.432424	-1.20948	150.562	1.30647e-34	4.3501e-34	1.18627e-30	8.30129e-31	1	-1	seq_var
GRMZM2G108514_T01	GRMZM2G108514	1	243871028	243872835	3140.32	1030.91	0.328281	-1.607	1066.74	5.59364e-234	1.03232e-232	5.07902e-230	4.80438e-230	1	-1	seq_var
GRMZM2G108609_T02	GRMZM2G108609	2	97551868	97614018	8598.61	1732.24	0.201456	-2.31147	4563.72	0	0	0	0	1	-1	seq_var	cold_on
GRMZM2G108741_T01	GRMZM2G108741	5	60306605	60311625	1077.58	159.051	0.1476	-2.76024	682.254	2.16099e-150	2.38418e-149	1.96218e-146	1.78454e-146	1	-1	seq_var
GRMZM2G108849_T01	GRMZM2G108849	7	152808839	152813057	837.107	415.504	0.496357	-1.01055	141.903	1.02129e-32	3.29776e-32	9.2733e-29	6.40246e-29	1	-1	seq_var	cold_up
GRMZM2G109009_T01	GRMZM2G109009	6	104883752	104890034	3185.01	1046.47	0.328562	-1.60576	1080.79	4.94522e-237	9.20136e-236	4.49026e-233	4.24943e-233	1	-1	seq_var
GRMZM2G109126_T01	GRMZM2G109126	1	63093741	63094565	308.139	92.7788	0.301094	-1.73171	115.685	5.57192e-27	1.62574e-26	5.05931e-23	3.32588e-23	1	-1	seq_var	cold_up
GRMZM2G109152_T01	GRMZM2G109152	8	145600480	145603634	1530.54	0.011647	7.60974e-06	-17.0037	1530.5	0	0	0	0	1	-1	seq_var
GRMZM2G109429_T01	GRMZM2G109429	3	168533377	168536519	303.613	105.971	0.349033	-1.51856	95.3708	1.57863e-22	4.2134e-22	1.4334e-18	8.96505e-19	1	-1	seq_var
GRMZM2G109431_T01	GRMZM2G109431	1	17693774	17697814	443.826	17.6686	0.0398098	-4.65073	393.526	1.41334e-87	9.457e-87	1.28331e-83	1.09167e-83	1	-1	seq_var
GRMZM2G109725_T02	GRMZM2G109725	1	2205792	2210356	834.322	378.833	0.454061	-1.13904	171.017	4.43654e-39	1.59287e-38	4.02838e-35	2.90682e-35	1	-1	seq_var
GRMZM2G109831_T01	GRMZM2G109831	1	39848086	39849398	613.273	88.6447	0.144544	-2.79042	392.118	2.86273e-87	1.90011e-86	2.59936e-83	2.20802e-83	1	-1	seq_var
GRMZM2G109976_T01	GRMZM2G109976	3	206779085	206783855	1640.32	557.419	0.339824	-1.55714	533.58	4.70032e-118	4.18421e-117	4.26789e-114	3.78893e-114	1	-1	seq_var
GRMZM2G110402_T03	GRMZM2G110402	6	98477144	98480261	946.342	246.267	0.26023	-1.94214	410.953	2.27357e-91	1.58192e-90	2.0644e-87	1.76793e-87	1	-1	seq_var
GRMZM2G110541_T01	GRMZM2G110541	5	190103401	190104973	342.853	164.804	0.480683	-1.05684	62.447	2.73711e-15	6.10038e-15	2.48529e-11	1.37047e-11	1	-1	seq_var
GRMZM2G110869_T01	GRMZM2G110869	10	148738549	148741164	1072.38	359.453	0.33519	-1.57695	354.979	3.4912e-79	2.08965e-78	3.17001e-75	2.64074e-75	1	-1	seq_var	heat_up; salt_up
GRMZM2G110922_T03	GRMZM2G110922	3	174813369	174818806	928.572	447.759	0.482202	-1.05229	167.969	2.05501e-38	7.28886e-38	1.86595e-34	1.34007e-34	1	-1	seq_var
GRMZM2G111491_T01	GRMZM2G111491	4	173835335	173846164	1244.84	262.362	0.210759	-2.24633	640.434	2.68906e-141	2.77462e-140	2.44166e-137	2.2053e-137	1	-1	seq_var
GRMZM2G111501_T01	GRMZM2G111501	8	172018571	172021091	617.627	84.9074	0.137474	-2.86277	403.952	7.59696e-90	5.19431e-89	6.89804e-86	5.88993e-86	1	-1	seq_var
GRMZM2G111697_T01	GRMZM2G111697	2	68561213	68563427	884.535	343.065	0.387847	-1.36644	238.832	7.06784e-54	3.1428e-53	6.4176e-50	4.97505e-50	1	-1	seq_var	cold_down; heat_up; uv_down
GRMZM2G111782_T02	GRMZM2G111782	5	163325880	163332095	693.293	257.597	0.371556	-1.42835	199.635	2.50898e-45	9.97878e-45	2.27816e-41	1.70561e-41	1	-1	seq_var	cold_up
GRMZM2G112278_T01	GRMZM2G112278	10	56489187	56492595	232.025	89.998	0.387881	-1.36631	62.6403	2.48129e-15	5.53702e-15	2.25301e-11	1.24362e-11	1	-1	seq_var
GRMZM2G112626_T01	GRMZM2G112626	5	198939373	198944291	1114.41	374.2	0.335784	-1.5744	368.067	4.93165e-82	3.08398e-81	4.47794e-78	3.76235e-78	1	-1	seq_var
GRMZM2G112912_T01	GRMZM2G112912	8	168604611	168605586	404.283	154.713	0.382686	-1.38577	111.423	4.78067e-26	1.37412e-25	4.34085e-22	2.83111e-22	1	-1	seq_var
GRMZM2G112951_T01	GRMZM2G112951	9	81694259	81697768	2532.64	330.809	0.130618	-2.93657	1693.09	0	0	0	0	1	-1	seq_var	cold_on; heat_on; salt_on
GRMZM2G112968_T01	GRMZM2G112968	8	11503197	11507304	5283.21	980.146	0.185521	-2.43035	2956.3	0	0	0	0	1	-1	seq_var
GRMZM2G113033_T02	GRMZM2G113033	2	143429392	143430540	197096	97670.8	0.49555	-1.0129	33536.1	0	0	0	0	1	-1	seq_var
GRMZM2G113135_T01	GRMZM2G113135	5	23018081	23018894	326.607	69.3829	0.212436	-2.2349	167.085	3.20488e-38	1.13187e-37	2.91003e-34	2.08638e-34	1	-1	seq_var
GRMZM2G113163_T01	GRMZM2G113163	9	155030819	155035256	1123.93	511.044	0.454695	-1.13703	229.744	6.77985e-52	2.93008e-51	6.15611e-48	4.73234e-48	1	-1	seq_var
GRMZM2G113203_T02	GRMZM2G113203	9	58021949	58028158	2705.67	914.283	0.337914	-1.56527	886.491	8.48353e-195	1.24043e-193	7.70305e-191	7.17707e-191	1	-1	seq_var	salt_up; uv_up
GRMZM2G113267_T01	GRMZM2G113267	9	155053479	155057032	1332.02	571.689	0.42919	-1.22031	303.67	5.22528e-68	2.75366e-67	4.74456e-64	3.84476e-64	1	-1	seq_var
GRMZM2G113340_T01	GRMZM2G113340	8	133690251	133691378	10140.9	2832.43	0.279306	-1.84008	4117.24	0	0	0	0	1	-1	seq_var
GRMZM2G113476_T03	GRMZM2G113476	2	207511344	207527307	8095.44	2616.41	0.323195	-1.62952	2802.49	0	0	0	0	1	-1	seq_var
GRMZM2G113873_T01	GRMZM2G113873	9	118703714	118709158	6594.03	3006.02	0.455869	-1.13331	1341.02	1.3789e-293	3.39307e-292	1.25204e-289	1.2013e-289	1	-1	seq_var
GRMZM2G114044_T02	GRMZM2G114044	3	2813742	2815256	1556.84	348.397	0.223784	-2.15982	766.486	1.04418e-168	1.30956e-167	9.4812e-165	8.72625e-165	1	-1	seq_var
GRMZM2G114131_T02	GRMZM2G114131	2	15979183	15983496	167.036	8.63878	0.0517182	-4.27318	142.818	6.44055e-33	2.08411e-32	5.84802e-29	4.04144e-29	1	-1	seq_var
GRMZM2G114234_T02	GRMZM2G114234	1	21682194	21685130	571.059	190.807	0.334128	-1.58153	189.786	3.53948e-43	1.35835e-42	3.21385e-39	2.37676e-39	1	-1	seq_var
GRMZM2G114841_T01	GRMZM2G114841	1	193906297	193910801	1418.68	263.935	0.186043	-2.42629	792.475	2.33423e-174	3.0192e-173	2.11948e-170	1.95585e-170	1	-1	seq_var
GRMZM2G114850_T01	GRMZM2G114850	3	122090412	122094741	451.396	146.052	0.323556	-1.62791	156.056	8.232e-36	2.7995e-35	7.47466e-32	5.27754e-32	1	-1	seq_var	salt_on
GRMZM2G114911_T01	GRMZM2G114911	4	155013152	155024436	487.03	143.559	0.294764	-1.76237	187.083	1.37743e-42	5.23306e-42	1.2507e-38	9.21635e-39	1	-1	seq_var
GRMZM2G115342_T02	GRMZM2G115342	4	236304585	236308119	1532.39	189.091	0.123396	-3.01863	1048.19	6.00818e-230	1.08243e-228	5.45542e-226	5.15321e-226	1	-1	seq_var
GRMZM2G115921_T01	GRMZM2G115921	1	61717707	61723301	536.349	231.244	0.431144	-1.21376	121.274	3.32782e-28	9.91358e-28	3.02166e-24	2.00767e-24	1	-1	seq_var
GRMZM2G116053_T01	GRMZM2G116053	3	13597363	13600737	1656.72	566.07	0.341682	-1.54927	535.144	2.14703e-118	1.91691e-117	1.9495e-114	1.73136e-114	1	-1	seq_var
GRMZM2G116614_T01	GRMZM2G116614	7	121257089	121259224	2764.42	403.392	0.145923	-2.77672	1759.72	0	0	0	0	1	-1	seq_var	cold_up
GRMZM2G116658_T01	GRMZM2G116658	7	141712281	141718468	906.781	413.913	0.456465	-1.13143	183.932	6.71249e-42	2.52065e-41	6.09494e-38	4.47253e-38	1	-1	seq_var
GRMZM2G116675_T03	GRMZM2G116675	4	195378718	195384031	599.613	76.626	0.127792	-2.96813	404.466	5.87213e-90	4.02407e-89	5.3319e-86	4.55443e-86	1	-1	seq_var
GRMZM2G116714_T02	GRMZM2G116714	1	172297761	172303366	1507.1	566.68	0.376006	-1.41117	426.466	9.55357e-95	6.93416e-94	8.67464e-91	7.48044e-91	1	-1	seq_var
GRMZM2G116785_T01	GRMZM2G116785	6	107553355	107556923	1418.51	303.596	0.214025	-2.22415	721.807	5.41774e-159	6.40535e-158	4.91931e-155	4.50377e-155	1	-1	seq_var
GRMZM2G116803_T01	GRMZM2G116803	9	154199287	154201261	2220.95	929.837	0.418665	-1.25613	529.069	4.50269e-117	3.94637e-116	4.08844e-113	3.62241e-113	1	-1	seq_var	heat_up; salt_up
GRMZM2G116952_T05	GRMZM2G116952	7	88823260	88829152	1161.84	167.781	0.14441	-2.79176	743.185	1.21697e-163	1.48522e-162	1.105e-159	1.01458e-159	1	-1	seq_var
GRMZM2G117507_T01	GRMZM2G117507	6	147529642	147539893	1173.1	65.8496	0.0561331	-4.155	989.548	3.35889e-217	5.61671e-216	3.04987e-213	2.86782e-213	1	-1	seq_var
GRMZM2G117746_T01	GRMZM2G117746	9	127747444	127763579	1379.08	688.427	0.499194	-1.00233	230.711	4.17108e-52	1.80866e-51	3.78734e-48	2.91433e-48	1	-1	seq_var
GRMZM2G118403_T01	GRMZM2G118403	3	212775404	212781235	3678.32	161.991	0.0440395	-4.50506	3219.68	0	0	0	0	1	-1	seq_var
GRMZM2G118409_T01	GRMZM2G118409	8	173991279	174002135	1096.93	292.528	0.266678	-1.90683	465.698	2.76712e-103	2.14932e-102	2.51255e-99	2.18935e-99	1	-1	seq_var	cold_up
GRMZM2G119546_T02	GRMZM2G119546	9	82647825	82661487	1284.64	623.781	0.485569	-1.04225	228.845	1.06476e-51	4.58854e-51	9.66805e-48	7.42566e-48	1	-1	seq_var
GRMZM2G119571_T01	GRMZM2G119571	5	91301942	91306920	1968.5	792.064	0.40237	-1.31341	501.345	4.84518e-111	4.02878e-110	4.39943e-107	3.87082e-107	1	-1	seq_var
GRMZM2G119725_T03	GRMZM2G119725	5	131493811	131498268	734.941	299.893	0.40805	-1.29318	182.896	1.12996e-41	4.22921e-41	1.02601e-37	7.51991e-38	1	-1	seq_var
GRMZM2G119933_T01	GRMZM2G119933	1	15778467	15784692	442.859	200.292	0.452271	-1.14474	91.4849	1.12448e-21	2.95009e-21	1.02103e-17	6.31957e-18	1	-1	seq_var
GRMZM2G120167_T01	GRMZM2G120167	4	16152931	16158076	1589.95	718.852	0.452122	-1.14522	328.662	1.88068e-73	1.06264e-72	1.70766e-69	1.40562e-69	1	-1	seq_var
GRMZM2G120175_T04	GRMZM2G120175	6	158607741	158613120	952.513	460.664	0.48363	-1.04802	171.185	4.07661e-39	1.46422e-38	3.70156e-35	2.6714e-35	1	-1	seq_var
GRMZM2G120539_T01	GRMZM2G120539	5	70710604	70713043	1080	136.344	0.126245	-2.9857	732.098	3.13296e-161	3.76785e-160	2.84472e-157	2.6085e-157	1	-1	seq_var	cold_up; heat_up; salt_up
GRMZM2G120579_T01	GRMZM2G120579	5	34629277	34632988	8669.48	3614.4	0.416911	-1.26219	2080.27	0	0	0	0	1	-1	seq_var
GRMZM2G120971_T01	GRMZM2G120971	7	169484381	169486976	1787.24	441.53	0.247046	-2.01715	812.526	1.02019e-178	1.3523e-177	9.26328e-175	8.56548e-175	1	-1	seq_var
GRMZM2G121047_T01	GRMZM2G121047	1	253422017	253423228	940.948	447.389	0.475466	-1.07258	175.462	4.74596e-40	1.73484e-39	4.30934e-36	3.13091e-36	1	-1	seq_var
GRMZM2G121208_T01	GRMZM2G121208	6	161903231	161906464	714.693	118.352	0.165599	-2.59423	426.894	7.70785e-95	5.60347e-94	6.99873e-91	6.03679e-91	1	-1	seq_var
GRMZM2G121494_T01	GRMZM2G121494	4	48186141	48187111	6614.34	3178.27	0.480512	-1.05735	1205.66	3.58796e-264	7.64759e-263	3.25787e-260	3.10538e-260	1	-1	seq_var
GRMZM2G121625_T01	GRMZM2G121625	10	25330545	25331489	268.718	90.0399	0.335073	-1.57745	88.9897	3.96869e-21	1.02695e-20	3.60357e-17	2.21136e-17	1	-1	seq_var
GRMZM2G121649_T02	GRMZM2G121649	7	124249378	124254808	2355.1	840.954	0.357078	-1.48569	717.335	5.083e-158	5.93998e-157	4.61537e-154	4.22093e-154	1	-1	seq_var
GRMZM2G121683_T01	GRMZM2G121683	3	23432597	23438701	826.74	57.5644	0.0696282	-3.84418	669.035	1.61951e-147	1.74854e-146	1.47052e-143	1.33448e-143	1	-1	seq_var
GRMZM2G121753_T01	GRMZM2G121753	3	211692320	211693746	2393.84	1071.05	0.44742	-1.1603	505.001	7.7615e-112	6.49534e-111	7.04744e-108	6.2061e-108	1	-1	seq_var	cold_up; salt_up; uv_off
GRMZM2G122072_T01	GRMZM2G122072	3	200282333	200292465	81.6985	0	0	-Inf	81.6985	1.58517e-19	3.95205e-19	1.43934e-15	8.62175e-16	1	-1	seq_var	cold_on; uv_on
GRMZM2G122199_T01	GRMZM2G122199	5	23477130	23486664	1052.76	498.573	0.473587	-1.0783	197.973	5.78429e-45	2.28453e-44	5.25213e-41	3.9229e-41	1	-1	seq_var
GRMZM2G122239_T01	GRMZM2G122239	2	61953710	61958839	942.065	245.766	0.26088	-1.93854	408.167	9.18775e-91	6.35859e-90	8.34247e-87	7.13796e-87	1	-1	seq_var
GRMZM2G122296_T01	GRMZM2G122296	3	206225251	206228777	861.281	267.863	0.311006	-1.68499	311.869	8.55391e-70	4.60673e-69	7.76695e-66	6.32562e-66	1	-1	seq_var	cold_up; salt_down
GRMZM2G122330_T01	GRMZM2G122330	10	42042102	42046315	1381.25	0	0	-Inf	1381.25	2.49203e-302	6.37399e-301	2.26277e-298	2.17455e-298	1	-1	seq_var
GRMZM2G122479_T01	GRMZM2G122479	6	139464390	139470075	2897.88	1027.39	0.35453	-1.49602	891.338	7.49499e-196	1.10478e-194	6.80545e-192	6.34451e-192	1	-1	seq_var
GRMZM2G122954_T01	GRMZM2G122954	4	21934054	21936956	798.536	164.441	0.205929	-2.27978	417.534	8.39843e-93	5.94834e-92	7.62577e-89	6.54993e-89	1	-1	seq_var
GRMZM2G123495_T01	GRMZM2G123495	5	30616439	30619843	621.895	189.91	0.305373	-1.71136	229.872	6.35748e-52	2.74885e-51	5.77259e-48	4.43816e-48	1	-1	seq_var
GRMZM2G123537_T02	GRMZM2G123537	4	171007080	171012916	5453.9	2655.13	0.486832	-1.0385	965.972	4.47507e-212	7.26899e-211	4.06337e-208	3.81366e-208	1	-1	seq_var
GRMZM2G123540_T01	GRMZM2G123540	3	1721112	1725872	980.251	210.437	0.214676	-2.21976	497.708	2.99752e-110	2.47432e-109	2.72175e-106	2.39232e-106	1	-1	seq_var
GRMZM2G123652_T02	GRMZM2G123652	2	147937439	147943881	7260.56	1575.13	0.216943	-2.20461	3658.36	0	0	0	0	1	-1	seq_var
GRMZM2G123896_T02	GRMZM2G123896	1	222643514	222645135	9185.51	2229.96	0.242769	-2.04234	4238.08	0	0	0	0	1	-1	seq_var
GRMZM2G123987_T01	GRMZM2G123987	9	136326062	136332117	643.891	231.591	0.359675	-1.47524	194.168	3.91306e-44	1.5223e-43	3.55306e-40	2.64014e-40	1	-1	seq_var
GRMZM2G124317_T01	GRMZM2G124317	9	123666928	123670137	1356.07	639.748	0.471765	-1.08386	257.098	7.36302e-58	3.44088e-57	6.68562e-54	5.25572e-54	1	-1	seq_var
GRMZM2G124353_T01	GRMZM2G124353	1	15352527	15355919	640.378	148.703	0.232211	-2.10649	306.362	1.35444e-68	7.17942e-68	1.22984e-64	9.97954e-65	1	-1	seq_var
GRMZM2G124791_T03	GRMZM2G124791	5	19692768	19693689	1338.64	357.048	0.266725	-1.90658	568.219	1.37001e-125	1.29176e-124	1.24396e-121	1.11217e-121	1	-1	seq_var
GRMZM2G124890_T01	GRMZM2G124890	6	130343021	130345825	453.007	38.8619	0.0857864	-3.54311	348.703	8.11858e-78	4.78991e-77	7.37167e-74	6.12303e-74	1	-1	seq_var
GRMZM2G124915_T01	GRMZM2G124915	6	134014022	134023125	1246.99	573.05	0.459547	-1.12172	249.552	3.25151e-56	1.49034e-55	2.95237e-52	2.30857e-52	1	-1	seq_var
GRMZM2G125239_T01	GRMZM2G125239	4	221138448	221142197	705.914	190.901	0.270431	-1.88667	295.756	2.76945e-66	1.4296e-65	2.51466e-62	2.02779e-62	1	-1	seq_var
GRMZM2G125304_T02	GRMZM2G125304	1	82498393	82505409	1120.84	144.843	0.129227	-2.95202	752.613	1.08426e-165	1.33222e-164	9.84511e-162	9.04493e-162	1	-1	seq_var
GRMZM2G125487_T01	GRMZM2G125487	2	204243355	204246026	496.945	187.316	0.376935	-1.40761	140.108	2.52167e-32	8.09644e-32	2.28967e-28	1.5768e-28	1	-1	seq_var
GRMZM2G125557_T01	GRMZM2G125557	1	209011006	209013986	2269.32	679.913	0.299611	-1.73884	856.567	2.71636e-188	3.81804e-187	2.46645e-184	2.29125e-184	1	-1	seq_var
GRMZM2G126002_T01	GRMZM2G126002	10	13553374	13557804	1262.09	550.111	0.435873	-1.19802	279.723	8.62987e-63	4.28661e-62	7.83593e-59	6.25925e-59	1	-1	seq_var
GRMZM2G126447_T01	GRMZM2G126447	5	144742563	144753368	1819.39	830.55	0.456498	-1.13132	368.994	3.09974e-82	1.9451e-81	2.81456e-78	2.36634e-78	1	-1	seq_var
GRMZM2G126545_T02	GRMZM2G126545	10	105058169	105069011	1462.46	655.916	0.448502	-1.15681	307.08	9.44819e-69	5.01987e-68	8.57895e-65	6.9652e-65	1	-1	seq_var
GRMZM2G126732_T01	GRMZM2G126732	4	177657802	177660210	276.421	0	0	-Inf	276.421	4.52505e-62	2.22696e-61	4.10875e-58	3.27433e-58	1	-1	seq_var
GRMZM2G126858_T02	GRMZM2G126858	10	141858691	141869227	1587.84	652.311	0.410816	-1.28344	390.696	5.83853e-87	3.86399e-86	5.30139e-83	4.50092e-83	1	-1	seq_var	heat_on; salt_on
GRMZM2G126900_T02	GRMZM2G126900	9	57432621	57435747	2374.31	428.812	0.180605	-2.46909	1350.27	1.34551e-295	3.32895e-294	1.22172e-291	1.17248e-291	1	-1	seq_var	cold_down; heat_down; salt_down; uv_up
GRMZM2G126988_T01	GRMZM2G126988	5	33070313	33085769	3722.69	801.942	0.21542	-2.21478	1885.41	0	0	0	0	1	-1	seq_var
GRMZM2G127080_T02	GRMZM2G127080	6	123554827	123558607	1173.71	450.505	0.383828	-1.38147	322.02	5.25787e-72	2.91997e-71	4.77415e-68	3.91501e-68	1	-1	seq_var
GRMZM2G127134_T01	GRMZM2G127134	2	219785666	219794161	688.153	255.322	0.371025	-1.43041	198.567	4.29125e-45	1.70151e-44	3.89645e-41	2.91419e-41	1	-1	seq_var
GRMZM2G127379_T01	GRMZM2G127379	10	2682268	2684357	652.428	123.048	0.1886	-2.4066	361.382	1.40796e-80	8.58008e-80	1.27843e-76	1.06879e-76	1	-1	seq_var	cold_off; salt_up; uv_up
GRMZM2G127510_T02	GRMZM2G127510	7	153320097	153324697	417.25	144.546	0.346425	-1.52939	132.375	1.23883e-30	3.86814e-30	1.12486e-26	7.64728e-27	1	-1	seq_var
GRMZM2G127546_T02	GRMZM2G127546	1	251099829	251102648	2058.11	305.798	0.148582	-2.75067	1298.95	1.91588e-284	4.50678e-283	1.73962e-280	1.66586e-280	1	-1	seq_var
GRMZM2G128131_T02	GRMZM2G128131	5	212793350	212797973	783.522	281.424	0.359178	-1.47723	236.728	2.03349e-53	8.98771e-53	1.84641e-49	1.42893e-49	1	-1	seq_var
GRMZM2G128179_T01	GRMZM2G128179	2	16692075	16696326	1156.79	326.761	0.282473	-1.82381	464.389	5.3319e-103	4.13438e-102	4.84136e-99	4.21753e-99	1	-1	seq_var
GRMZM2G128644_T01	GRMZM2G128644	1	52250200	52251583	475.194	84.4905	0.177802	-2.49165	272.741	2.86696e-61	1.39807e-60	2.6032e-57	2.06966e-57	1	-1	seq_var	heat_on; salt_on; uv_on
GRMZM2G128665_T01	GRMZM2G128665	1	26825757	26828101	1056.58	446.069	0.422181	-1.24407	248.046	6.92364e-56	3.16071e-55	6.28666e-52	4.91024e-52	1	-1	seq_var
GRMZM2G129019_T02	GRMZM2G129019	8	158552277	158553077	625.214	228.595	0.365627	-1.45155	184.241	5.74864e-42	2.1605e-41	5.21977e-38	3.83147e-38	1	-1	seq_var
GRMZM2G129146_T01	GRMZM2G129146	5	203744058	203751559	1262.92	434.647	0.34416	-1.53885	404.129	6.95165e-90	4.76025e-89	6.3121e-86	5.391e-86	1	-1	seq_var	cold_up; salt_down
GRMZM2G129166_T01	GRMZM2G129166	6	155264533	155265651	604.399	150.333	0.248732	-2.00734	273.177	2.30428e-61	1.12488e-60	2.09228e-57	1.66392e-57	1	-1	seq_var
GRMZM2G129175_T01	GRMZM2G129175	7	5557187	5557868	372.346	164.203	0.440997	-1.18116	80.7441	2.56926e-19	6.37228e-19	2.33289e-15	1.39254e-15	1	-1	seq_var
GRMZM2G129354_T01	GRMZM2G129354	7	157792542	157797282	4933.58	2111.04	0.427891	-1.22468	1130.9	6.34867e-248	1.25317e-246	5.7646e-244	5.47319e-244	1	-1	seq_var
GRMZM2G129444_T02	GRMZM2G129444	3	172490574	172520783	678.906	298.436	0.439583	-1.18579	148.114	4.48026e-34	1.48038e-33	4.06808e-30	2.83735e-30	1	-1	seq_var
GRMZM2G130109_T01	GRMZM2G130109	2	37074613	37078111	3150.57	1071.86	0.340211	-1.5555	1023.36	1.5057e-224	2.63424e-223	1.36717e-220	1.28918e-220	1	-1	seq_var	heat_up; uv_down
GRMZM2G130356_T01	GRMZM2G130356	3	220726428	220730159	1381.96	460.422	0.333165	-1.58569	460.946	2.99312e-102	2.30318e-101	2.71776e-98	2.36487e-98	1	-1	seq_var
GRMZM2G130449_T01	GRMZM2G130449	6	75903031	75909575	353.422	118.642	0.335696	-1.57477	116.767	3.2293e-27	9.46178e-27	2.9322e-23	1.93177e-23	1	-1	seq_var
GRMZM2G130459_T01	GRMZM2G130459	5	207437058	207441313	1121.21	299.571	0.267186	-1.90409	475.154	2.42263e-105	1.92118e-104	2.19975e-101	1.9226e-101	1	-1	seq_var
GRMZM2G130486_T01	GRMZM2G130486	2	147236433	147238542	48.1872	0	0	-Inf	48.1872	3.87403e-12	7.81694e-12	3.51762e-08	1.77469e-08	1	-1	seq_var	cold_on
GRMZM2G130678_T01	GRMZM2G130678	5	5246397	5249772	30164.2	12013.4	0.398267	-1.32819	7811.03	0	0	0	0	1	-1	seq_var
GRMZM2G130889_T01	GRMZM2G130889	2	11392998	11404255	1708.67	431.681	0.252642	-1.98484	761.885	1.04502e-167	1.30879e-166	9.48876e-164	8.73217e-164	1	-1	seq_var
GRMZM2G130910_T02	GRMZM2G130910	7	84870169	84881375	374.878	49.1997	0.131242	-2.9297	250.111	2.45666e-56	1.12887e-55	2.23065e-52	1.74546e-52	1	-1	seq_var
GRMZM2G131243_T01	GRMZM2G131243	7	163714879	163716789	1881.89	458.53	0.243653	-2.0371	865.641	2.89253e-190	4.11664e-189	2.62642e-186	2.44216e-186	1	-1	seq_var
GRMZM2G131280_T01	GRMZM2G131280	2	13553048	13555243	2689.21	733.378	0.272712	-1.87455	1117.65	4.80511e-245	9.24374e-244	4.36304e-241	4.13672e-241	1	-1	seq_var
GRMZM2G131329_T01	GRMZM2G131329	4	36078056	36082771	372.788	152.839	0.409988	-1.28635	92.0385	8.50062e-22	2.23726e-21	7.71856e-18	4.7867e-18	1	-1	seq_var
GRMZM2G131340_T01	GRMZM2G131340	7	85604861	85606104	3512.44	1659.64	0.472505	-1.0816	663.728	2.31041e-146	2.47681e-145	2.09786e-142	1.90239e-142	1	-1	seq_var
GRMZM2G131489_T02	GRMZM2G131489	7	81954100	81965889	2979.39	1383.65	0.464407	-1.10654	583.628	6.09557e-129	5.85691e-128	5.53478e-125	4.95936e-125	1	-1	seq_var
GRMZM2G131575_T01	GRMZM2G131575	1	273852128	273853789	1096.73	290.238	0.26464	-1.9179	468.957	5.40288e-104	4.22187e-103	4.90581e-100	4.27854e-100	1	-1	seq_var
GRMZM2G131969_T01	GRMZM2G131969	10	132197208	132201522	2137.02	778.08	0.364096	-1.45761	633.498	8.67129e-140	8.84666e-139	7.87353e-136	7.10265e-136	1	-1	seq_var	salt_up
GRMZM2G132431_T01	GRMZM2G132431	6	142851760	142853025	474.508	125.84	0.265201	-1.91484	202.499	5.95125e-46	2.38365e-45	5.40373e-42	4.05518e-42	1	-1	seq_var
GRMZM2G132547_T01	GRMZM2G132547	8	147182413	147189799	2288	759.537	0.331965	-1.5909	766.589	9.91973e-169	1.2458e-167	9.00711e-165	8.29091e-165	1	-1	seq_var
GRMZM2G132704_T01	GRMZM2G132704	1	187668762	187674033	1384.74	565.125	0.408109	-1.29297	344.522	6.60921e-77	3.86424e-76	6.00116e-73	4.97541e-73	1	-1	seq_var
GRMZM2G132796_T01	GRMZM2G132796	8	8352115	8357776	3471.85	546.623	0.157444	-2.66709	2129.41	0	0	0	0	1	-1	seq_var
GRMZM2G132811_T01	GRMZM2G132811	8	8350046	8351261	1353.12	633.587	0.468243	-1.09467	260.594	1.27382e-58	6.01774e-58	1.15663e-54	9.11927e-55	1	-1	seq_var
GRMZM2G133563_T01	GRMZM2G133563	4	126025310	126031236	562.379	183.618	0.326503	-1.61483	192.306	9.97865e-44	3.85394e-43	9.06061e-40	6.71563e-40	1	-1	seq_var
GRMZM2G133653_T01	GRMZM2G133653	4	235739594	235743177	353.273	78.8164	0.223103	-2.16422	174.331	8.38286e-40	3.0532e-39	7.61163e-36	5.52262e-36	1	-1	seq_var
GRMZM2G133854_T01	GRMZM2G133854	2	23235632	23257168	424.845	204.125	0.48047	-1.05748	77.4553	1.35763e-18	3.30844e-18	1.23272e-14	7.27009e-15	1	-1	seq_var
GRMZM2G133941_T01	GRMZM2G133941	4	69304507	69311917	361.586	6.90415	0.0190941	-5.71073	341.391	3.17683e-76	1.84789e-75	2.88456e-72	2.38898e-72	1	-1	seq_var
GRMZM2G134130_T01	GRMZM2G134130	6	6261448	6262458	20381.5	9567.53	0.469423	-1.09104	3904.67	0	0	0	0	1	-1	seq_var
GRMZM2G134227_T01	GRMZM2G134227	1	291327116	291332488	3978.13	649.167	0.163184	-2.61543	2394.91	0	0	0	0	1	-1	seq_var
GRMZM2G134264_T01	GRMZM2G134264	2	102766801	102769426	1509.81	596.246	0.394915	-1.34039	396.285	3.54545e-88	2.38464e-87	3.21927e-84	2.74099e-84	1	-1	seq_var
GRMZM2G134334_T01	GRMZM2G134334	2	190221217	190222430	904.504	294.442	0.325529	-1.61914	310.419	1.7697e-69	9.469e-69	1.60689e-65	1.30675e-65	1	-1	seq_var	cold_up; salt_up
GRMZM2G134419_T01	GRMZM2G134419	5	98287412	98289514	210.717	75.2635	0.357178	-1.48528	64.157	1.14892e-15	2.58734e-15	1.04322e-11	5.80088e-12	1	-1	seq_var
GRMZM2G134424_T02	GRMZM2G134424	9	137033523	137039913	466.066	146.261	0.31382	-1.67199	167.027	3.29987e-38	1.16496e-37	2.99629e-34	2.14789e-34	1	-1	seq_var
GRMZM2G134628_T01	GRMZM2G134628	3	220928320	220934085	1203.24	218.836	0.181872	-2.459	681.434	3.25887e-150	3.58673e-149	2.95905e-146	2.69052e-146	1	-1	seq_var	salt_up; uv_down
GRMZM2G134731_T01	GRMZM2G134731	9	112962505	112963816	519.669	114.236	0.219825	-2.18557	259.306	2.43058e-58	1.13937e-57	2.20697e-54	1.73641e-54	1	-1	seq_var
GRMZM2G135199_T01	GRMZM2G135199	1	300058358	300063217	275.852	104.316	0.378159	-1.40294	77.399	1.39683e-18	3.40216e-18	1.26832e-14	7.47724e-15	1	-1	seq_var
GRMZM2G135283_T02	GRMZM2G135283	1	274342102	274347177	11907	4812.42	0.404166	-1.30698	3010.48	0	0	0	0	1	-1	seq_var
GRMZM2G135341_T01	GRMZM2G135341	7	174404316	174410512	961.432	85.5019	0.0889318	-3.49116	732.858	2.14165e-161	2.57907e-160	1.94462e-157	1.78335e-157	1	-1	seq_var
GRMZM2G135470_T01	GRMZM2G135470	10	123393683	123398962	516.745	193.411	0.374286	-1.41779	147.215	7.04352e-34	2.32058e-33	6.39551e-30	4.45502e-30	1	-1	seq_var
GRMZM2G135476_T02	GRMZM2G135476	9	12269598	12272959	718.804	300.002	0.417363	-1.26063	172.158	2.50006e-39	9.01174e-39	2.27006e-35	1.64054e-35	1	-1	seq_var
GRMZM2G135617_T01	GRMZM2G135617	1	194761999	194765199	1260.32	241.847	0.191894	-2.38162	690.526	3.43408e-152	3.84008e-151	3.11814e-148	2.83964e-148	1	-1	seq_var
GRMZM2G135739_T01	GRMZM2G135739	7	1232553	1236835	982.725	233.908	0.238019	-2.07085	460.885	3.08549e-102	2.37225e-101	2.80162e-98	2.43753e-98	1	-1	seq_var
GRMZM2G135904_T02	GRMZM2G135904	5	59063709	59067442	1045.45	483.465	0.462446	-1.11264	206.57	7.69413e-47	3.10915e-46	6.98627e-43	5.25817e-43	1	-1	seq_var
GRMZM2G136311_T01	GRMZM2G136311	6	90893670	90898467	920.161	229.76	0.249695	-2.00176	414.51	3.82253e-92	2.68227e-91	3.47086e-88	2.97661e-88	1	-1	seq_var	cold_up
GRMZM2G136857_T02	GRMZM2G136857	6	44984304	44985841	7423.15	2914.76	0.392658	-1.34865	1966.12	0	0	0	0	1	-1	seq_var
GRMZM2G136960_T01	GRMZM2G136960	10	144108828	144109924	538.104	110.361	0.205092	-2.28566	282.149	2.55381e-63	1.2762e-62	2.31886e-59	1.85509e-59	1	-1	seq_var
GRMZM2G136996_T01	GRMZM2G136996	4	167199584	167213585	1269.73	548.055	0.431629	-1.21214	286.514	2.85864e-64	1.44122e-63	2.59564e-60	2.08109e-60	1	-1	seq_var
GRMZM2G137329_T01	GRMZM2G137329	1	2993011	2993734	2140.05	265.042	0.123848	-3.01335	1461.75	0	0	0	0	1	-1	seq_var	salt_up; uv_down
GRMZM2G137775_T01	GRMZM2G137775	4	71881417	71882070	649.885	130.718	0.20114	-2.31373	345.291	4.4944e-77	2.63285e-76	4.08092e-73	3.38473e-73	1	-1	seq_var
GRMZM2G137788_T01	GRMZM2G137788	1	268802186	268806287	991.578	8e-06	8.06795e-09	-26.8852	991.578	1.21603e-217	2.04474e-216	1.10416e-213	1.03861e-213	1	-1	seq_var
GRMZM2G137868_T01	GRMZM2G137868	1	184941358	184944047	12421.5	5946.55	0.478731	-1.06271	2282.49	0	0	0	0	1	-1	seq_var
GRMZM2G137875_T01	GRMZM2G137875	5	5787789	5788061	161.783	47.3065	0.292408	-1.77395	62.6756	2.43714e-15	5.43983e-15	2.21292e-11	1.22174e-11	1	-1	seq_var
GRMZM2G138067_T01	GRMZM2G138067	6	158101986	158103004	1991.57	958.098	0.481077	-1.05566	362.096	9.84212e-81	6.0342e-80	8.93664e-77	7.48001e-77	1	-1	seq_var	cold_up; uv_down
GRMZM2G138230_T02	GRMZM2G138230	7	150538439	150548848	2545.52	1028.28	0.403956	-1.30773	644.137	4.20949e-142	4.36326e-141	3.82222e-138	3.45389e-138	1	-1	seq_var
GRMZM2G138842_T01	GRMZM2G138842	6	111196724	111206583	1241.5	25.7708	0.0207578	-5.59021	1166.29	1.2945e-255	2.64732e-254	1.17541e-251	1.11806e-251	1	-1	seq_var
GRMZM2G139123_T01	GRMZM2G139123	1	295100635	295101482	1206.4	595.867	0.493923	-1.01764	206.821	6.78385e-47	2.74498e-46	6.15974e-43	4.63812e-43	1	-1	seq_var	salt_up
GRMZM2G139300_T01	GRMZM2G139300	5	169497597	169502089	1997.19	610.323	0.30559	-1.71033	737.64	1.95391e-162	2.36553e-161	1.77415e-158	1.6278e-158	1	-1	seq_var	salt_up; uv_up
GRMZM2G139374_T01	GRMZM2G139374	8	171307904	171313546	5010.28	2275.8	0.454226	-1.13852	1026.26	3.52232e-225	6.1862e-224	3.19826e-221	3.01651e-221	1	-1	seq_var
GRMZM2G139419_T01	GRMZM2G139419	10	118167728	118179258	1402.28	610.534	0.435386	-1.19963	311.437	1.06208e-69	5.70632e-69	9.64368e-66	7.84983e-66	1	-1	seq_var
GRMZM2G139614_T01	GRMZM2G139614	5	180719990	180724177	597.606	89.097	0.14909	-2.74575	376.555	6.99761e-84	4.484e-83	6.35383e-80	5.36297e-80	1	-1	seq_var
GRMZM2G140116_T01	GRMZM2G140116	2	197884434	197885893	484.499	227.066	0.46866	-1.09339	93.1357	4.88289e-22	1.29148e-21	4.43367e-18	2.75786e-18	1	-1	seq_var
GRMZM2G140150_T01	GRMZM2G140150	5	205833927	205838509	3685.16	1824.9	0.495202	-1.01391	628.046	1.32975e-138	1.33711e-137	1.20741e-134	1.08747e-134	1	-1	seq_var
GRMZM2G140328_T02	GRMZM2G140328	2	11635595	11654126	1442.75	131.547	0.091178	-3.45517	1092.08	1.74041e-239	3.27183e-238	1.58029e-235	1.4964e-235	1	-1	seq_var
GRMZM2G140339_T01	GRMZM2G140339	1	11908440	11941521	597.904	275.125	0.460149	-1.11983	119.339	8.82851e-28	2.61032e-27	8.01629e-24	5.30593e-24	1	-1	seq_var
GRMZM2G140998_T01	GRMZM2G140998	6	29349820	29350895	1059.65	331.042	0.312408	-1.6785	381.728	5.23288e-85	3.39389e-84	4.75145e-81	4.01937e-81	1	-1	seq_var
GRMZM2G141273_T04	GRMZM2G141273	1	43754973	43760422	3346.96	1270.47	0.37959	-1.39749	933.81	4.38563e-205	6.81875e-204	3.98215e-201	3.72647e-201	1	-1	seq_var
GRMZM2G141289_T01	GRMZM2G141289	7	167677886	167680080	5555.13	2383.61	0.429083	-1.22067	1267.02	1.66186e-277	3.80093e-276	1.50897e-273	1.44316e-273	1	-1	seq_var
GRMZM2G141473_T01	GRMZM2G141473	1	286577038	286584000	9521.27	4455.94	0.467999	-1.09542	1835.67	0	0	0	0	1	-1	seq_var
GRMZM2G141707_T01	GRMZM2G141707	1	219858097	219861575	517.583	171.57	0.331483	-1.59299	173.728	1.13519e-39	4.11808e-39	1.03076e-35	7.46731e-36	1	-1	seq_var
GRMZM2G142039_T01	GRMZM2G142039	4	233143596	233148096	956.982	335.866	0.350964	-1.51061	298.4	7.35288e-67	3.82384e-66	6.67642e-63	5.39334e-63	1	-1	seq_var
GRMZM2G142093_T02	GRMZM2G142093	5	53208158	53209401	8333.67	3764.04	0.451667	-1.14667	1726.07	0	0	0	0	1	-1	seq_var	salt_up; uv_down
GRMZM2G142217_T01	GRMZM2G142217	6	158310452	158311881	324.152	97.5384	0.300903	-1.73263	121.781	2.57815e-28	7.70307e-28	2.34096e-24	1.55772e-24	1	-1	seq_var
GRMZM2G142565_T01	GRMZM2G142565	10	59447597	59458559	560.138	128.288	0.229029	-2.1264	270.9	7.22379e-61	3.50011e-60	6.5592e-57	5.20619e-57	1	-1	seq_var
GRMZM2G142751_T01	GRMZM2G142751	6	112768227	112770230	431.778	198.546	0.459833	-1.12082	86.3006	1.54564e-20	3.94891e-20	1.40344e-16	8.54277e-17	1	-1	seq_var
GRMZM2G142825_T01	GRMZM2G142825	4	26636669	26640580	699.965	187.933	0.268489	-1.89706	295.278	3.52073e-66	1.81226e-65	3.19682e-62	2.57611e-62	1	-1	seq_var
GRMZM2G143205_T02	GRMZM2G143205	2	70964774	70973190	2094.95	313.346	0.149572	-2.74109	1317.99	1.39173e-288	3.35196e-287	1.26369e-284	1.21136e-284	1	-1	seq_var
GRMZM2G143211_T01	GRMZM2G143211	8	16744023	16748694	1734.41	325.57	0.187712	-2.41341	963.523	1.52467e-211	2.46774e-210	1.3844e-207	1.29902e-207	1	-1	seq_var
GRMZM2G143403_T01	GRMZM2G143403	2	130269520	130271747	131.153	11.4946	0.0876429	-3.51222	100.374	1.26174e-23	3.45494e-23	1.14566e-19	7.27393e-20	1	-1	seq_var
GRMZM2G143462_T04	GRMZM2G143462	4	235441460	235448609	477.935	56.9233	0.119102	-3.06973	331.398	4.76716e-74	2.71045e-73	4.32858e-70	3.56775e-70	1	-1	seq_var
GRMZM2G143469_T01	GRMZM2G143469	8	140001718	140003009	3590.73	1041.32	0.290001	-1.78587	1403.16	4.32141e-307	1.1179e-305	3.92384e-303	3.77259e-303	1	-1	seq_var
GRMZM2G143568_T01	GRMZM2G143568	10	61390270	61396404	2136.17	232.494	0.108837	-3.19977	1529.97	0	0	0	0	1	-1	seq_var
GRMZM2G143602_T01	GRMZM2G143602	2	236711216	236716267	2111.28	851.722	0.403415	-1.30966	535.43	1.86035e-118	1.66423e-117	1.6892e-114	1.50056e-114	1	-1	seq_var
GRMZM2G143644_T01	GRMZM2G143644	1	196334855	196338719	1058.38	5e-06	4.72419e-09	-27.6573	1058.38	3.66568e-232	6.69706e-231	3.32844e-228	3.14662e-228	1	-1	seq_var
GRMZM2G144097_T02	GRMZM2G144097	5	194758296	194763363	1165.37	242.676	0.20824	-2.26368	604.643	1.6368e-133	1.60498e-132	1.48621e-129	1.33481e-129	1	-1	seq_var
GRMZM2G144224_T01	GRMZM2G144224	1	46236786	46238037	1512.45	666.621	0.440754	-1.18195	328.321	2.23143e-73	1.25925e-72	2.02614e-69	1.66732e-69	1	-1	seq_var	cold_up; salt_down; uv_down
GRMZM2G144273_T01	GRMZM2G144273	5	1333687	1341860	8267.04	3673.77	0.444388	-1.17011	1766.89	0	0	0	0	1	-1	seq_var
GRMZM2G144818_T01	GRMZM2G144818	9	113509157	113515960	832.467	392.317	0.471271	-1.08537	158.176	2.83231e-36	9.67183e-36	2.57174e-32	1.81891e-32	1	-1	seq_var
GRMZM2G144956_T01	GRMZM2G144956	2	67538924	67539544	405.709	15.0484	0.0370916	-4.75276	362.717	7.21126e-81	4.43619e-80	6.54782e-77	5.48416e-77	1	-1	seq_var
GRMZM2G145024_T02	GRMZM2G145024	1	52769200	52772970	900.377	444.67	0.493871	-1.01779	154.395	1.89822e-35	6.41929e-35	1.72358e-31	1.2141e-31	1	-1	seq_var
GRMZM2G145589_T01	GRMZM2G145589	6	129214269	129219886	1696.43	309.961	0.182714	-2.45234	958.084	2.32026e-210	3.72884e-209	2.10679e-206	1.97593e-206	1	-1	seq_var
GRMZM2G145632_T01	GRMZM2G145632	8	96687688	96689353	268.527	107.917	0.401886	-1.31514	68.5241	1.25334e-16	2.8987e-16	1.13803e-12	6.46095e-13	1	-1	seq_var	cold_on
GRMZM2G145895_T03	GRMZM2G145895	2	171510939	171513398	2887.94	782.229	0.27086	-1.88438	1208.13	1.04516e-264	2.24882e-263	9.49003e-261	9.05002e-261	1	-1	seq_var
GRMZM2G146012_T01	GRMZM2G146012	8	5190767	5197500	229.329	101.003	0.440426	-1.18303	49.8521	1.65786e-12	3.38277e-12	1.50533e-08	7.67753e-09	1	-1	seq_var
GRMZM2G146267_T01	GRMZM2G146267	2	154150688	154158967	4737.1	1572.67	0.331991	-1.59079	1587	0	0	0	0	1	-1	seq_var
GRMZM2G146298_T01	GRMZM2G146298	6	39874920	39876869	136.2	0	0	-Inf	136.2	1.80401e-31	5.69952e-31	1.63804e-27	1.11975e-27	1	-1	seq_var	cold_on; salt_off
GRMZM2G146475_T01	GRMZM2G146475	3	149448034	149449090	591.291	83.3884	0.141028	-2.82595	382.352	3.8273e-85	2.48761e-84	3.47519e-81	2.9409e-81	1	-1	seq_var
GRMZM2G147266_T01	GRMZM2G147266	10	1279030	1283646	765.498	341.657	0.44632	-1.16385	162.255	3.63881e-37	1.25772e-36	3.30404e-33	2.34849e-33	1	-1	seq_var
GRMZM2G147587_T01	GRMZM2G147587	8	6661829	6671763	605.385	227.11	0.37515	-1.41446	171.883	2.87015e-39	1.03212e-38	2.6061e-35	1.88167e-35	1	-1	seq_var
GRMZM2G147787_T01	GRMZM2G147787	9	143446864	143448420	2309.01	883.095	0.382457	-1.38663	636.954	1.5357e-140	1.57739e-139	1.39441e-136	1.25881e-136	1	-1	seq_var
GRMZM2G147849_T01	GRMZM2G147849	1	273761376	273764703	1119.29	475.15	0.424511	-1.23613	260.226	1.53201e-58	7.21134e-58	1.39107e-54	1.09569e-54	1	-1	seq_var
GRMZM2G147882_T01	GRMZM2G147882	8	20977098	20981343	2243.61	677.381	0.301916	-1.72778	839.807	1.19567e-184	1.64496e-183	1.08567e-180	1.00688e-180	1	-1	seq_var	cold_down; heat_up
GRMZM2G148022_T02	GRMZM2G148022	8	173529415	173541170	684.609	45.4019	0.066318	-3.91446	559.698	9.77767e-124	9.06856e-123	8.87812e-120	7.92187e-120	1	-1	seq_var
GRMZM2G148090_T01	GRMZM2G148090	9	156245115	156247188	5409.6	2290.07	0.423335	-1.24013	1263.88	7.98975e-277	1.82279e-275	7.2547e-273	6.9375e-273	1	-1	seq_var
GRMZM2G148106_T01	GRMZM2G148106	9	22066396	22069582	1042.77	336.204	0.322416	-1.633	362.03	1.01763e-80	6.23485e-80	9.24004e-77	7.73294e-77	1	-1	seq_var
GRMZM2G148198_T01	GRMZM2G148198	2	55107843	55110270	211.167	6.0916	0.0288473	-5.11542	193.575	5.27192e-44	2.04656e-43	4.7869e-40	3.55433e-40	1	-1	seq_var
GRMZM2G148281_T01	GRMZM2G148281	1	207946160	207950205	599.407	186.148	0.310554	-1.68709	217.404	3.331e-49	1.3906e-48	3.02455e-45	2.30039e-45	1	-1	seq_var	salt_down; uv_up
GRMZM2G148301_T01	GRMZM2G148301	5	185449428	185452044	900.908	113.498	0.125981	-2.98872	611.21	6.10325e-135	6.00406e-134	5.54175e-131	4.97903e-131	1	-1	seq_var
GRMZM2G148495_T01	GRMZM2G148495	10	142868640	142869872	632.639	108.534	0.171557	-2.54324	370.611	1.37799e-82	8.67696e-82	1.25122e-78	1.05265e-78	1	-1	seq_var	heat_up
GRMZM2G148709_T02	GRMZM2G148709	6	124919159	124927554	2649.88	870.042	0.328333	-1.60677	899.968	9.97021e-198	1.48897e-196	9.05295e-194	8.44776e-194	1	-1	seq_var
GRMZM2G148807_T01	GRMZM2G148807	5	46557814	46567200	1393.81	507.277	0.363949	-1.45819	413.418	6.60739e-92	4.615e-91	5.99951e-88	5.14121e-88	1	-1	seq_var
GRMZM2G148913_T01	GRMZM2G148913	4	218445184	218457848	1934.71	161.219	0.0833294	-3.58503	1500.66	0	0	0	0	1	-1	seq_var
GRMZM2G149751_T05	GRMZM2G149751	1	176866831	176872994	832.894	313.711	0.376652	-1.4087	235.086	4.63572e-53	2.03936e-52	4.20923e-49	3.25288e-49	1	-1	seq_var
GRMZM2G149847_T03	GRMZM2G149847	2	233015906	233019721	772.327	364.635	0.472125	-1.08276	146.19	1.17968e-33	3.86977e-33	1.07115e-29	7.44735e-30	1	-1	seq_var
GRMZM2G149923_T01	GRMZM2G149923	1	275154534	275157007	523.654	260.271	0.497029	-1.0086	88.491	5.10658e-21	1.31914e-20	4.63678e-17	2.84232e-17	1	-1	seq_var
GRMZM2G150058_T02	GRMZM2G150058	9	152315582	152316624	226.395	68.658	0.303266	-1.72134	84.3271	4.19332e-20	1.05824e-19	3.80754e-16	2.2992e-16	1	-1	seq_var
GRMZM2G150190_T03	GRMZM2G150190	4	235613746	235617819	3068.05	1412.59	0.460419	-1.11898	611.642	4.91665e-135	4.842e-134	4.46432e-131	4.0115e-131	1	-1	seq_var
GRMZM2G150248_T01	GRMZM2G150248	10	147028225	147032518	4708.17	1601.76	0.340209	-1.55551	1529.3	0	0	0	0	1	-1	seq_var	cold_up; salt_down; uv_up
GRMZM2G150260_T01	GRMZM2G150260	3	216312171	216314107	761.581	253.012	0.332219	-1.58979	254.922	2.19476e-57	1.01988e-56	1.99284e-53	1.5642e-53	1	-1	seq_var
GRMZM2G150363_T01	GRMZM2G150363	5	200743141	200745544	1941.04	969.289	0.499366	-1.00183	324.465	1.54322e-72	8.62304e-72	1.40124e-68	1.15062e-68	1	-1	seq_var
GRMZM2G150952_T01	GRMZM2G150952	3	213086587	213098517	3358.69	1114.75	0.331901	-1.59118	1125.59	9.05946e-247	1.76145e-245	8.22599e-243	7.80382e-243	1	-1	seq_var
GRMZM2G151873_T03	GRMZM2G151873	1	292486955	292494114	1468.26	699.443	0.476376	-1.06983	272.674	2.96597e-61	1.44557e-60	2.6931e-57	2.14084e-57	1	-1	seq_var
GRMZM2G151903_T02	GRMZM2G151903	10	2435350	2439141	662.13	167.854	0.253506	-1.97991	294.354	5.59733e-66	2.87302e-65	5.08238e-62	4.09277e-62	1	-1	seq_var	salt_up
GRMZM2G151983_T01	GRMZM2G151983	2	217889025	217898090	8912.85	1398.94	0.156957	-2.67156	5475.18	0	0	0	0	1	-1	seq_var
GRMZM2G152041_T02	GRMZM2G152041	6	71175233	71176049	1558.96	540.167	0.346492	-1.5291	494.461	1.5248e-109	1.24957e-108	1.38452e-105	1.21572e-105	1	-1	seq_var
GRMZM2G152370_T01	GRMZM2G152370	3	7608923	7611774	494.546	66.2193	0.133899	-2.90078	327.167	3.98005e-73	2.24047e-72	3.61388e-69	2.9723e-69	1	-1	seq_var
GRMZM2G152466_T02	GRMZM2G152466	5	9482229	9485476	3193.17	1441.98	0.451583	-1.14694	661.61	6.67106e-146	7.12626e-145	6.05732e-142	5.49095e-142	1	-1	seq_var
GRMZM2G152552_T02	GRMZM2G152552	1	212996323	212998478	210.792	64.5732	0.306337	-1.70681	77.6419	1.23521e-18	3.01255e-18	1.12157e-14	6.61826e-15	1	-1	seq_var
GRMZM2G152768_T01	GRMZM2G152768	6	108671579	108679656	1600.84	542.581	0.338935	-1.56092	522.489	1.21627e-115	1.05379e-114	1.10437e-111	9.77028e-112	1	-1	seq_var
GRMZM2G152925_T01	GRMZM2G152925	1	66953830	66958431	1517.63	358.799	0.236421	-2.08057	715.661	1.17553e-157	1.36844e-156	1.06738e-153	9.75809e-154	1	-1	seq_var
GRMZM2G153227_T01	GRMZM2G153227	5	185497818	185501457	302.939	146.408	0.483293	-1.04903	54.5276	1.53279e-13	3.23443e-13	1.39177e-09	7.32368e-10	1	-1	seq_var
GRMZM2G153250_T01	GRMZM2G153250	6	127140347	127150036	3054.72	1424.33	0.466273	-1.10075	593.465	4.41792e-131	4.29954e-130	4.01147e-127	3.59972e-127	1	-1	seq_var
GRMZM2G153569_T03	GRMZM2G153569	8	111673738	111676379	813.454	329.6	0.405185	-1.30335	204.815	1.85805e-46	7.48164e-46	1.68711e-42	1.26831e-42	1	-1	seq_var
GRMZM2G153745_T01	GRMZM2G153745	4	237865820	237867165	987.011	403.538	0.408849	-1.29036	244.825	3.48938e-55	1.58023e-54	3.16836e-51	2.46909e-51	1	-1	seq_var
GRMZM2G154056_T01	GRMZM2G154056	3	76125082	76126029	87.9542	0	0	-Inf	87.9542	6.69877e-21	1.72455e-20	6.08248e-17	3.7205e-17	1	-1	seq_var	cold_on
GRMZM2G154156_T01	GRMZM2G154156	2	107721878	107727155	415.02	5.08081	0.0122423	-6.35198	400.023	5.44311e-89	3.70213e-88	4.94235e-85	4.21624e-85	1	-1	seq_var
GRMZM2G154223_T01	GRMZM2G154223	2	61137166	61138179	983.78	214.901	0.218444	-2.19466	493.187	2.88599e-109	2.35866e-108	2.62048e-105	2.30013e-105	1	-1	seq_var	cold_down; salt_up
GRMZM2G154278_T01	GRMZM2G154278	8	26071033	26074622	888.733	245.824	0.2766	-1.85413	364.312	3.24177e-81	2.00376e-80	2.94353e-77	2.46763e-77	1	-1	seq_var
GRMZM2G154463_T01	GRMZM2G154463	8	112872987	112876973	393.54	10.1306	0.0257423	-5.27971	364.165	3.48902e-81	2.15366e-80	3.16803e-77	2.65514e-77	1	-1	seq_var
GRMZM2G154505_T01	GRMZM2G154505	4	230277228	230278253	6147.48	2718.41	0.442199	-1.17723	1326.27	2.21348e-290	5.40281e-289	2.00984e-286	1.92772e-286	1	-1	seq_var
GRMZM2G154549_T01	GRMZM2G154549	1	86000972	86004906	1067.12	424.421	0.397727	-1.33015	276.935	3.49621e-62	1.72343e-61	3.17456e-58	2.53091e-58	1	-1	seq_var	cold_up; uv_down
GRMZM2G154574_T01	GRMZM2G154574	7	152997411	153005288	1196.9	18.6131	0.0155511	-6.00684	1142.2	2.22297e-250	4.43618e-249	2.01846e-246	1.91754e-246	1	-1	seq_var
GRMZM2G154580_T01	GRMZM2G154580	1	90223947	90224841	188.141	58.7225	0.312119	-1.67983	67.8481	1.76593e-16	4.0666e-16	1.60346e-12	9.07333e-13	1	-1	seq_var	salt_up; uv_off
GRMZM2G154881_T01	GRMZM2G154881	8	88396526	88401136	1599.45	251.316	0.157126	-2.67001	982.011	1.46047e-215	2.4199e-214	1.32611e-211	1.24622e-211	1	-1	seq_var	cold_up; salt_up
GRMZM2G154987_T01	GRMZM2G154987	5	152250417	152251663	573.576	167.153	0.291423	-1.77881	222.995	2.0092e-50	8.49328e-50	1.82436e-46	1.39298e-46	1	-1	seq_var
GRMZM2G155123_T02	GRMZM2G155123	8	131105649	131117677	5296.97	2078.76	0.392444	-1.34944	1404.18	2.59662e-307	6.73638e-306	2.35773e-303	2.26711e-303	1	-1	seq_var
GRMZM2G155974_T01	GRMZM2G155974	3	133812995	133826187	3411.38	884.308	0.259223	-1.94774	1486.63	0	0	0	0	1	-1	seq_var
GRMZM2G156027_T01	GRMZM2G156027	9	13772118	13772838	274.616	100.813	0.367107	-1.44573	80.4609	2.96515e-19	7.33212e-19	2.69235e-15	1.60385e-15	1	-1	seq_var
GRMZM2G156162_T03	GRMZM2G156162	6	87961062	87966349	650.767	269.883	0.414715	-1.26981	157.576	3.82993e-36	1.30589e-35	3.47757e-32	2.45805e-32	1	-1	seq_var
GRMZM2G156206_T01	GRMZM2G156206	8	165183790	165185361	160.322	36.0528	0.224877	-2.15279	78.6398	7.45331e-19	1.82662e-18	6.76761e-15	4.0069e-15	1	-1	seq_var
GRMZM2G156238_T02	GRMZM2G156238	4	220239827	220255398	460.927	180.984	0.392653	-1.34867	122.085	2.21134e-28	6.62235e-28	2.0079e-24	1.33764e-24	1	-1	seq_var
GRMZM2G156376_T01	GRMZM2G156376	9	29880471	29882039	1181.74	189.247	0.160143	-2.64257	718.493	2.84688e-158	3.33544e-157	2.58497e-154	2.36462e-154	1	-1	seq_var	cold_up
GRMZM2G156486_T01	GRMZM2G156486	1	15989647	15996740	676.54	102.357	0.151295	-2.72457	423.273	4.73124e-94	3.4095e-93	4.29596e-90	3.7003e-90	1	-1	seq_var
GRMZM2G156643_T01	GRMZM2G156643	8	6583060	6588142	382.796	64.1674	0.167628	-2.57666	227.142	2.504e-51	1.0745e-50	2.27363e-47	1.74404e-47	1	-1	seq_var
GRMZM2G156803_T01	GRMZM2G156803	4	123356668	123361714	799.019	197.183	0.246782	-2.01869	363.587	4.66086e-81	2.87309e-80	4.23206e-77	3.54598e-77	1	-1	seq_var	salt_up; uv_down
GRMZM2G157113_T02	GRMZM2G157113	6	116979471	116981578	1726.34	831.442	0.481622	-1.05403	313.098	4.61615e-70	2.4964e-69	4.19146e-66	3.41687e-66	1	-1	seq_var
GRMZM2G157153_T01	GRMZM2G157153	8	71491031	71492711	544.613	89.4083	0.164169	-2.60675	326.821	4.73435e-73	2.66014e-72	4.29879e-69	3.53419e-69	1	-1	seq_var
GRMZM2G157443_T04	GRMZM2G157443	4	37969755	37971265	388.468	18.7908	0.0483717	-4.36969	335.563	5.90444e-75	3.38889e-74	5.36123e-71	4.42774e-71	1	-1	seq_var
GRMZM2G157462_T01	GRMZM2G157462	6	115470624	115479568	2539.19	1241.4	0.488895	-1.0324	445.504	6.86555e-99	5.13502e-98	6.23392e-95	5.40112e-95	1	-1	seq_var
GRMZM2G157470_T02	GRMZM2G157470	1	250122582	250128213	1818.65	902.022	0.495983	-1.01164	308.826	3.93547e-69	2.0983e-68	3.5734e-65	2.90359e-65	1	-1	seq_var
GRMZM2G158034_T01	GRMZM2G158034	4	37626157	37628934	1565.96	321.101	0.20505	-2.28595	821.215	1.31695e-180	1.76111e-179	1.19579e-176	1.1065e-176	1	-1	seq_var
GRMZM2G158131_T01	GRMZM2G158131	5	61024958	61025879	12853	5498.09	0.427765	-1.22511	2947.8	0	0	0	0	1	-1	seq_var
GRMZM2G158232_T01	GRMZM2G158232	3	20541671	20542514	438.723	55.2066	0.125835	-2.9904	297.785	1.00066e-66	5.18903e-66	9.08598e-63	7.33483e-63	1	-1	seq_var	cold_up; heat_up; salt_up; uv_down
GRMZM2G158261_T03	GRMZM2G158261	1	44339652	44344157	271.071	42.7094	0.157558	-2.66604	166.196	5.01315e-38	1.765e-37	4.55194e-34	3.25955e-34	1	-1	seq_var
GRMZM2G158437_T04	GRMZM2G158437	1	205458645	205461501	818.906	255.317	0.311779	-1.68141	295.685	2.86994e-66	1.47978e-65	2.6059e-62	2.10079e-62	1	-1	seq_var
GRMZM2G158562_T02	GRMZM2G158562	3	200205518	200209648	746.57	298.151	0.399361	-1.32423	192.472	9.17903e-44	3.54964e-43	8.33456e-40	6.18024e-40	1	-1	seq_var
GRMZM2G159002_T01	GRMZM2G159002	10	66555171	66557866	1381.22	561.63	0.406619	-1.29825	345.743	3.58276e-77	2.10151e-76	3.25314e-73	2.69889e-73	1	-1	seq_var
GRMZM2G159028_T01	GRMZM2G159028	6	167082883	167085767	2024.71	870.471	0.429923	-1.21785	460.17	4.41532e-102	3.3918e-101	4.00911e-98	3.48766e-98	1	-1	seq_var
GRMZM2G159029_T01	GRMZM2G159029	8	35323122	35323602	320.934	104.944	0.326995	-1.61266	109.542	1.23438e-25	3.51683e-25	1.12081e-21	7.27541e-22	1	-1	seq_var	salt_up
GRMZM2G159032_T01	GRMZM2G159032	6	161426908	161429635	206.867	62.7889	0.303523	-1.72012	76.9817	1.72551e-18	4.19257e-18	1.56676e-14	9.22114e-15	1	-1	seq_var
GRMZM2G159285_T01	GRMZM2G159285	1	275098311	275101078	336.292	91.5787	0.272319	-1.87663	139.959	2.7169e-32	8.71404e-32	2.46694e-28	1.69806e-28	1	-1	seq_var
GRMZM2G159678_T03	GRMZM2G159678	2	88425836	88429706	387.998	118.982	0.306657	-1.7053	142.746	6.6789e-33	2.15893e-32	6.06444e-29	4.18901e-29	1	-1	seq_var
GRMZM2G159908_T01	GRMZM2G159908	3	229396711	229398661	850.19	133.605	0.157147	-2.66981	521.953	1.59075e-115	1.37562e-114	1.4444e-111	1.27753e-111	1	-1	seq_var	heat_up; salt_down
GRMZM2G159924_T02	GRMZM2G159924	3	204733062	204736151	1321.43	503.603	0.381105	-1.39174	366.48	1.09272e-81	6.80049e-81	9.92192e-78	8.32873e-78	1	-1	seq_var
GRMZM2G160237_T02	GRMZM2G160237	1	39047900	39055823	3286.7	1230.29	0.374324	-1.41764	936.206	1.32218e-205	2.06634e-204	1.20054e-201	1.12385e-201	1	-1	seq_var
GRMZM2G160906_T04	GRMZM2G160906	1	40730452	40733267	1247.38	589.316	0.472443	-1.08179	235.775	3.28033e-53	1.4466e-52	2.97854e-49	2.30345e-49	1	-1	seq_var
GRMZM2G161335_T01	GRMZM2G161335	1	180333582	180335486	6593.74	1438.64	0.218183	-2.19639	3308.49	0	0	0	0	1	-1	seq_var
GRMZM2G161337_T02	GRMZM2G161337	1	38129502	38135226	4789.58	2043.32	0.426617	-1.22899	1103.77	4.99874e-242	9.53541e-241	4.53886e-238	4.30142e-238	1	-1	seq_var
GRMZM2G161566_T02	GRMZM2G161566	4	181757980	181760735	460.53	56.7421	0.12321	-3.0208	315.201	1.60764e-70	8.75144e-70	1.45974e-66	1.19175e-66	1	-1	seq_var
GRMZM2G161587_T01	GRMZM2G161587	7	43337611	43344599	2414.03	885.144	0.366667	-1.44746	708.506	4.22777e-156	4.85926e-155	3.83881e-152	3.50524e-152	1	-1	seq_var
GRMZM2G161809_T02	GRMZM2G161809	7	151008863	151014148	605.331	277.18	0.457899	-1.1269	122.019	2.28687e-28	6.84402e-28	2.07648e-24	1.38287e-24	1	-1	seq_var
GRMZM2G161832_T02	GRMZM2G161832	8	56398478	56403324	216.99	47.1987	0.217516	-2.20081	109.123	1.52537e-25	4.33502e-25	1.38504e-21	8.97835e-22	1	-1	seq_var
GRMZM2G162184_T01	GRMZM2G162184	5	55243566	55261337	2610.32	848.778	0.325162	-1.62077	897.066	4.26242e-197	6.34472e-196	3.87028e-193	3.6107e-193	1	-1	seq_var
GRMZM2G162486_T01	GRMZM2G162486	9	139006146	139008600	4938.47	1314.55	0.266185	-1.9095	2100.24	0	0	0	0	1	-1	seq_var	salt_up; uv_down
GRMZM2G162525_T01	GRMZM2G162525	8	134439555	134444960	577.036	286.907	0.497208	-1.00808	97.4309	5.57697e-23	1.50398e-22	5.06388e-19	3.18668e-19	1	-1	seq_var
GRMZM2G162535_T02	GRMZM2G162535	1	21567145	21567967	439.186	163.946	0.373295	-1.42161	125.606	3.74992e-29	1.13687e-28	3.40493e-25	2.2822e-25	1	-1	seq_var
GRMZM2G162637_T01	GRMZM2G162637	4	142180853	142188195	1209.66	364.144	0.301031	-1.73202	454.245	8.5945e-101	6.54133e-100	7.8038e-97	6.77934e-97	1	-1	seq_var
GRMZM2G162668_T01	GRMZM2G162668	8	118420023	118421288	335.764	16.7372	0.0498481	-4.32632	288.731	9.39655e-65	4.77185e-64	8.53207e-61	6.85291e-61	1	-1	seq_var
GRMZM2G162672_T01	GRMZM2G162672	6	140479362	140500562	5652.56	1030.83	0.182365	-2.4551	3196.05	0	0	0	0	1	-1	seq_var
GRMZM2G162739_T01	GRMZM2G162739	2	159575160	159577058	673.389	304.388	0.452024	-1.14553	139.256	3.87097e-32	1.23762e-31	3.51485e-28	2.41588e-28	1	-1	seq_var	cold_up; salt_down; uv_up
GRMZM2G162755_T01	GRMZM2G162755	6	120058984	120060863	503.934	66.6476	0.132255	-2.91861	335.13	7.33472e-75	4.20185e-74	6.65993e-71	5.49811e-71	1	-1	seq_var	heat_up; salt_down; uv_down
GRMZM2G162814_T03	GRMZM2G162814	1	14940033	14942616	1391.37	529.723	0.38072	-1.3932	386.466	4.86674e-86	3.19292e-85	4.419e-82	3.74593e-82	1	-1	seq_var
GRMZM2G163045_T01	GRMZM2G163045	7	150924657	150926139	699.712	263.005	0.375877	-1.41167	198.098	5.43089e-45	2.14869e-44	4.93125e-41	3.6854e-41	1	-1	seq_var
GRMZM2G163178_T01	GRMZM2G163178	9	43799922	43802150	1144.37	308.397	0.269491	-1.89169	481.045	1.26555e-106	1.01244e-105	1.14912e-102	1.00561e-102	1	-1	seq_var
GRMZM2G163296_T01	GRMZM2G163296	1	283380355	283382396	308.142	29.8372	0.0968294	-3.36841	229.167	9.05927e-52	3.90775e-51	8.22581e-48	6.31974e-48	1	-1	seq_var
GRMZM2G163407_T01	GRMZM2G163407	3	195331837	195333082	1068.88	499.922	0.467707	-1.09632	206.343	8.62441e-47	3.48198e-46	7.83096e-43	5.8922e-43	1	-1	seq_var
GRMZM2G163546_T01	GRMZM2G163546	8	124152085	124153582	67.5163	0	0	-Inf	67.5163	2.08952e-16	4.79719e-16	1.89729e-12	1.07109e-12	1	-1	seq_var
GRMZM2G163998_T01	GRMZM2G163998	10	6865400	6866582	601.635	283.989	0.472029	-1.08305	113.93	1.35016e-26	3.91926e-26	1.22594e-22	8.03749e-23	1	-1	seq_var
GRMZM2G164117_T01	GRMZM2G164117	4	80666462	80669082	976.866	408.585	0.418261	-1.25753	233.096	1.25913e-52	5.50187e-52	1.14329e-48	8.81768e-49	1	-1	seq_var
GRMZM2G164224_T01	GRMZM2G164224	4	1070864	1074040	1426.25	620.13	0.434798	-1.20158	317.55	4.94887e-71	2.71844e-70	4.49358e-67	3.67602e-67	1	-1	seq_var
GRMZM2G164440_T01	GRMZM2G164440	2	156962054	156963314	721.09	294.667	0.408642	-1.29109	179.015	7.95102e-41	2.93477e-40	7.21952e-37	5.26437e-37	1	-1	seq_var
GRMZM2G164493_T02	GRMZM2G164493	1	280774456	280779161	567.492	262.32	0.462245	-1.11327	112.23	3.18182e-26	9.18339e-26	2.88909e-22	1.88841e-22	1	-1	seq_var
GRMZM2G164558_T01	GRMZM2G164558	1	280771850	280772885	56623.4	20850.6	0.368234	-1.44131	16517.6	0	0	0	0	1	-1	seq_var
GRMZM2G164676_T02	GRMZM2G164676	6	161750718	161815082	553.912	237.959	0.429597	-1.21894	126.064	2.9772e-29	9.05626e-29	2.70329e-25	1.8149e-25	1	-1	seq_var
GRMZM2G165217_T01	GRMZM2G165217	7	128595807	128597991	195.628	25.6315	0.131022	-2.93212	130.61	3.01321e-30	9.32194e-30	2.73599e-26	1.85192e-26	1	-1	seq_var
GRMZM2G165255_T02	GRMZM2G165255	5	2766959	2768258	376.662	158.319	0.420321	-1.25044	89.1128	3.72939e-21	9.65854e-21	3.38628e-17	2.07913e-17	1	-1	seq_var
GRMZM2G165418_T02	GRMZM2G165418	9	58834504	58858254	1273.25	562.319	0.441641	-1.17905	275.348	7.74983e-62	3.7914e-61	7.03685e-58	5.59925e-58	1	-1	seq_var
GRMZM2G165867_T01	GRMZM2G165867	1	92440365	92441592	769.357	206.545	0.268464	-1.8972	324.579	1.45693e-72	8.15595e-72	1.32289e-68	1.08673e-68	1	-1	seq_var	heat_up; salt_up
GRMZM2G166407_T01	GRMZM2G166407	1	190734662	190736024	657.754	279.582	0.425056	-1.23428	152.575	4.7447e-35	1.59268e-34	4.30819e-31	3.02522e-31	1	-1	seq_var
GRMZM2G166692_T01	GRMZM2G166692	7	99876087	99877627	4557.93	2182.51	0.478839	-1.06239	837.124	4.58024e-184	6.26335e-183	4.15886e-180	3.85519e-180	1	-1	seq_var	cold_down; salt_up; uv_down
GRMZM2G166877_T01	GRMZM2G166877	8	162381173	162382855	7460.98	3385.88	0.453812	-1.13983	1530.99	0	0	0	0	1	-1	seq_var
GRMZM2G166897_T02	GRMZM2G166897	7	138496398	138501399	388.029	90.099	0.232197	-2.10658	185.645	2.83772e-42	1.07137e-41	2.57665e-38	1.89446e-38	1	-1	seq_var	heat_up
GRMZM2G167008_T01	GRMZM2G167008	2	112109184	112111073	88.4212	19.8186	0.224139	-2.15753	43.4804	4.28231e-11	8.34408e-11	3.88834e-07	1.89321e-07	1	-1	seq_var
GRMZM2G167283_T01	GRMZM2G167283	3	198209492	198217522	354.429	14.0058	0.0395166	-4.6614	314.541	2.2383e-70	1.21699e-69	2.03238e-66	1.65881e-66	1	-1	seq_var
GRMZM2G167505_T01	GRMZM2G167505	5	30010408	30016527	3122.64	1370.69	0.438953	-1.18786	683.083	1.42752e-150	1.57687e-149	1.29619e-146	1.17899e-146	1	-1	seq_var
GRMZM2G168693_T01	GRMZM2G168693	2	189984625	189985928	1162.22	564.672	0.485857	-1.0414	206.766	6.97314e-47	2.82032e-46	6.33161e-43	4.76684e-43	1	-1	seq_var
GRMZM2G168855_T01	GRMZM2G168855	5	25897544	25903346	886.813	223.033	0.251499	-1.99137	396.995	2.48314e-88	1.67386e-87	2.25469e-84	1.92046e-84	1	-1	seq_var
GRMZM2G168890_T01	GRMZM2G168890	5	52793543	52796710	1163.8	46.6938	0.0401218	-4.63947	1030.93	3.40644e-226	6.04112e-225	3.09305e-222	2.91898e-222	1	-1	seq_var
GRMZM2G168913_T01	GRMZM2G168913	7	145668809	145677919	964.697	77.2893	0.0801177	-3.64174	755.761	2.24268e-166	2.7819e-165	2.03635e-162	1.87241e-162	1	-1	seq_var
GRMZM2G169005_T01	GRMZM2G169005	10	132634493	132636371	7066.82	2073.14	0.293362	-1.76925	2728.34	0	0	0	0	1	-1	seq_var
GRMZM2G169044_T01	GRMZM2G169044	5	198331512	198332364	489.029	214.646	0.438923	-1.18796	106.99	4.47489e-25	1.26147e-24	4.0632e-21	2.62228e-21	1	-1	seq_var
GRMZM2G169116_T01	GRMZM2G169116	8	150552217	150559397	765.703	162.738	0.212534	-2.23424	391.589	3.73144e-87	2.47491e-86	3.38815e-83	2.87769e-83	1	-1	seq_var
GRMZM2G169333_T01	GRMZM2G169333	6	97087894	97091309	938.651	404.903	0.431367	-1.21301	212.039	4.9312e-48	2.02512e-47	4.47753e-44	3.38774e-44	1	-1	seq_var
GRMZM2G169929_T01	GRMZM2G169929	3	12419801	12422262	940.287	459.689	0.488881	-1.03244	164.985	9.21841e-38	3.2268e-37	8.37032e-34	5.97998e-34	1	-1	seq_var
GRMZM2G170120_T04	GRMZM2G170120	3	50606697	50611699	11540.8	5121.51	0.443775	-1.1721	2473.08	0	0	0	0	1	-1	seq_var	salt_up; uv_down
GRMZM2G170276_T01	GRMZM2G170276	2	194485998	194488592	275.026	88.1035	0.320346	-1.6423	96.2195	1.02828e-22	2.75828e-22	9.33677e-19	5.85708e-19	1	-1	seq_var
GRMZM2G170413_T01	GRMZM2G170413	5	214101890	214102753	351.26	136.066	0.387364	-1.36824	95.0263	1.87873e-22	5.007e-22	1.70589e-18	1.06599e-18	1	-1	seq_var
GRMZM2G170586_T01	GRMZM2G170586	2	94266077	94267223	308.587	54.6417	0.17707	-2.49761	177.542	1.66764e-40	6.12299e-40	1.51422e-36	1.10198e-36	1	-1	seq_var	cold_up; heat_off
GRMZM2G170595_T01	GRMZM2G170595	5	201723132	201726342	2109.05	995.058	0.471805	-1.08374	399.784	6.13789e-89	4.16532e-88	5.5732e-85	4.75257e-85	1	-1	seq_var
GRMZM2G170742_T01	GRMZM2G170742	5	166617090	166617964	2194.29	56.5121	0.0257541	-5.27905	2030.43	0	0	0	0	1	-1	seq_var
GRMZM2G170760_T01	GRMZM2G170760	8	63680971	63689898	922.1	352.105	0.381851	-1.38892	254.978	2.13382e-57	9.92068e-57	1.93751e-53	1.52099e-53	1	-1	seq_var
GRMZM2G171060_T01	GRMZM2G171060	4	166904281	166908828	1311.28	366.56	0.279543	-1.83886	531.935	1.07134e-117	9.46281e-117	9.72777e-114	8.6275e-114	1	-1	seq_var
GRMZM2G171569_T01	GRMZM2G171569	7	21160811	21162260	3244.25	206.607	0.0636841	-3.97292	2673.9	0	0	0	0	1	-1	seq_var	cold_up; heat_up; salt_up
GRMZM2G172239_T02	GRMZM2G172239	5	188436310	188438766	327.23	120.299	0.367627	-1.44368	95.6822	1.3489e-22	3.60872e-22	1.2248e-18	7.67118e-19	1	-1	seq_var
GRMZM2G172274_T01	GRMZM2G172274	6	167337882	167339803	508.477	36.0555	0.0709089	-3.81789	409.86	3.93232e-91	2.72978e-90	3.57055e-87	3.05659e-87	1	-1	seq_var
GRMZM2G172442_T01	GRMZM2G172442	2	201551171	201562459	1506.01	696.72	0.462627	-1.11208	297.335	1.25417e-66	6.4925e-66	1.13879e-62	9.18929e-63	1	-1	seq_var
GRMZM2G172506_T01	GRMZM2G172506	1	255210490	255215008	3774.19	1485.72	0.393654	-1.345	995.659	1.57709e-218	2.67663e-217	1.432e-214	1.34778e-214	1	-1	seq_var	cold_up; heat_down; salt_down; uv_down
GRMZM2G172826_T01	GRMZM2G172826	2	195934972	195937356	3280	708.576	0.216029	-2.2107	1657.79	0	0	0	0	1	-1	seq_var
GRMZM2G173309_T01	GRMZM2G173309	2	30501295	30506023	574.624	0.000274	4.76833e-07	-21	574.623	5.54125e-127	5.27406e-126	5.03146e-123	4.50337e-123	1	-1	seq_var
GRMZM2G173424_T02	GRMZM2G173424	3	115377120	115403275	305.468	88.5086	0.289747	-1.78713	119.478	8.23074e-28	2.43516e-27	7.47351e-24	4.94832e-24	1	-1	seq_var
GRMZM2G173718_T01	GRMZM2G173718	8	15244932	15246538	6675.55	873.342	0.130827	-2.93427	4459.68	0	0	0	0	1	-1	seq_var
GRMZM2G173721_T04	GRMZM2G173721	2	237005510	237009872	421.183	73.6569	0.174881	-2.51556	244.068	5.10235e-55	2.30494e-54	4.63293e-51	3.60787e-51	1	-1	seq_var
GRMZM2G173777_T03	GRMZM2G173777	7	41183896	41191392	1990.65	540.332	0.271435	-1.88132	831.068	9.49647e-183	1.28125e-181	8.6228e-179	7.98464e-179	1	-1	seq_var
GRMZM2G173858_T01	GRMZM2G173858	6	67799098	67819109	446.723	180.914	0.404979	-1.30408	112.573	2.67685e-26	7.74071e-26	2.43058e-22	1.59032e-22	1	-1	seq_var
GRMZM2G173868_T03	GRMZM2G173868	8	171956808	171977242	890.007	63.4144	0.0712515	-3.81094	716.636	7.21527e-158	8.42091e-157	6.55147e-154	5.99084e-154	1	-1	seq_var
GRMZM2G173910_T01	GRMZM2G173910	7	156000702	156006384	502.749	134.413	0.267356	-1.90316	212.931	3.1516e-48	1.29957e-47	2.86165e-44	2.16798e-44	1	-1	seq_var	heat_up; salt_up
GRMZM2G173923_T01	GRMZM2G173923	7	42211043	42244189	3511.47	646.758	0.184185	-2.44078	1973.57	0	0	0	0	1	-1	seq_var
GRMZM2G173962_T01	GRMZM2G173962	6	3181850	3187622	497.483	10.0676	0.0202371	-5.62685	468.079	8.39189e-104	6.55188e-103	7.61984e-100	6.6447e-100	1	-1	seq_var	cold_up; salt_off
GRMZM2G174396_T01	GRMZM2G174396	7	100351591	100353678	621.085	234.018	0.376789	-1.40817	175.208	5.39206e-40	1.96863e-39	4.89599e-36	3.55553e-36	1	-1	seq_var	cold_up; salt_off
GRMZM2G174479_T01	GRMZM2G174479	3	145397996	145399691	219.197	101.277	0.462038	-1.11392	43.3891	4.4869e-11	8.72959e-11	4.0741e-07	1.98052e-07	1	-1	seq_var
GRMZM2G174570_T01	GRMZM2G174570	8	21450294	21454424	345.089	161.517	0.468045	-1.09528	66.5182	3.46684e-16	7.91325e-16	3.14789e-12	1.76913e-12	1	-1	seq_var
GRMZM2G174736_T01	GRMZM2G174736	10	95448560	95451686	232.312	17.9292	0.0771773	-3.69568	183.662	7.68793e-42	2.88456e-41	6.98064e-38	5.12093e-38	1	-1	seq_var
GRMZM2G175419_T04	GRMZM2G175419	8	132050033	132053483	1509.93	75.8287	0.0502199	-4.3156	1296.95	5.19421e-284	1.21555e-282	4.71634e-280	4.51532e-280	1	-1	seq_var
GRMZM2G175543_T01	GRMZM2G175543	6	88910388	88912086	607.606	13.4657	0.0221619	-5.49578	568.377	1.26599e-125	1.19493e-124	1.14952e-121	1.02786e-121	1	-1	seq_var
GRMZM2G175818_T01	GRMZM2G175818	1	206784775	206787442	907.142	453.287	0.499687	-1.0009	151.411	8.52191e-35	2.84586e-34	7.73789e-31	5.42164e-31	1	-1	seq_var
GRMZM2G176396_T02	GRMZM2G176396	6	158647664	158653521	558.525	74.9426	0.134179	-2.89777	369.162	2.84869e-82	1.7888e-81	2.58661e-78	2.17497e-78	1	-1	seq_var
GRMZM2G176397_T01	GRMZM2G176397	1	8131181	8143070	3822.35	1563.28	0.408983	-1.28989	947.599	4.41203e-208	7.01598e-207	4.00612e-204	3.75464e-204	1	-1	seq_var
GRMZM2G176433_T01	GRMZM2G176433	2	223004704	223005762	704.617	106.411	0.151019	-2.7272	441.231	5.84125e-98	4.34031e-97	5.30386e-94	4.59064e-94	1	-1	seq_var	salt_up; uv_off
GRMZM2G177050_T01	GRMZM2G177050	7	172920911	172923332	1373.61	378.879	0.275828	-1.85816	564.618	8.31996e-125	7.7962e-124	7.55452e-121	6.74915e-121	1	-1	seq_var	cold_up; salt_up
GRMZM2G177220_T01	GRMZM2G177220	3	165939858	165943821	1455.9	595.218	0.408831	-1.29042	361.157	1.57649e-80	9.58775e-80	1.43145e-76	1.19624e-76	1	-1	seq_var
GRMZM2G177617_T03	GRMZM2G177617	8	63908549	63911543	351.776	122.719	0.348855	-1.5193	110.575	7.33184e-26	2.09877e-25	6.65731e-22	4.33238e-22	1	-1	seq_var
GRMZM2G177631_T01	GRMZM2G177631	7	26503597	26509680	908.994	170.154	0.187189	-2.41743	505.849	5.07513e-112	4.25113e-111	4.60822e-108	4.05858e-108	1	-1	seq_var	cold_up
GRMZM2G177771_T01	GRMZM2G177771	8	67877822	67880314	319.336	141.36	0.442669	-1.1757	68.7554	1.11463e-16	2.58316e-16	1.01208e-12	5.75481e-13	1	-1	seq_var
GRMZM2G177842_T01	GRMZM2G177842	7	42749032	42752313	604.862	61.2174	0.101209	-3.30459	443.715	1.68228e-98	1.25411e-97	1.52751e-94	1.32277e-94	1	-1	seq_var
GRMZM2G177914_T03	GRMZM2G177914	9	144855084	144858213	760.188	240.756	0.316706	-1.65878	269.555	1.41855e-60	6.84766e-60	1.28805e-56	1.02136e-56	1	-1	seq_var
GRMZM2G177974_T01	GRMZM2G177974	1	276758755	276765477	1999.67	536.639	0.268364	-1.89774	843.928	1.51957e-185	2.10331e-184	1.37977e-181	1.28024e-181	1	-1	seq_var
GRMZM2G178038_T01	GRMZM2G178038	5	214755720	214760368	2300.04	270.902	0.117781	-3.08582	1601.52	0	0	0	0	1	-1	seq_var
GRMZM2G178169_T01	GRMZM2G178169	4	83054063	83060358	3052.95	1495.57	0.489876	-1.02951	533.238	5.57932e-118	4.95697e-117	5.06602e-114	4.49637e-114	1	-1	seq_var
GRMZM2G178244_T01	GRMZM2G178244	3	175820807	175825748	1629.43	571.578	0.350784	-1.51134	508.425	1.39593e-112	1.17362e-111	1.26751e-108	1.11688e-108	1	-1	seq_var
GRMZM2G178371_T01	GRMZM2G178371	5	58032939	58036223	898.436	327.659	0.3647	-1.45522	265.71	9.77181e-60	4.6699e-59	8.8728e-56	7.01713e-56	1	-1	seq_var
GRMZM2G178522_T01	GRMZM2G178522	7	110587111	110597384	1720.98	614.427	0.357021	-1.48592	524.305	4.89665e-116	4.2547e-115	4.44616e-112	3.93495e-112	1	-1	seq_var
GRMZM2G178616_T01	GRMZM2G178616	6	66597023	66600277	847.438	300.862	0.355025	-1.49401	260.164	1.58076e-58	7.43694e-58	1.43533e-54	1.1304e-54	1	-1	seq_var
GRMZM2G178709_T01	GRMZM2G178709	2	28459969	28486639	567.354	144.935	0.255458	-1.96884	250.513	2.00741e-56	9.23369e-56	1.82273e-52	1.42667e-52	1	-1	seq_var
GRMZM2G178756_T01	GRMZM2G178756	6	62895992	62899068	516.352	175.387	0.339666	-1.55781	168.065	1.95823e-38	6.95374e-38	1.77807e-34	1.27755e-34	1	-1	seq_var
GRMZM2G178775_T01	GRMZM2G178775	9	151532689	151533548	4369.98	2134.62	0.488473	-1.03365	768.203	4.42067e-169	5.56722e-168	4.01397e-165	3.69568e-165	1	-1	seq_var
GRMZM2G178829_T02	GRMZM2G178829	7	161474696	161477495	1505.62	638.123	0.423828	-1.23845	351.045	2.50972e-78	1.48748e-77	2.27882e-74	1.89458e-74	1	-1	seq_var
GRMZM2G179002_T01	GRMZM2G179002	2	193070899	193077187	409.685	178.158	0.434864	-1.20136	91.1896	1.30546e-21	3.42095e-21	1.18536e-17	7.33146e-18	1	-1	seq_var	cold_up
GRMZM2G179031_T02	GRMZM2G179031	2	193082283	193084452	309.981	126.219	0.407183	-1.29625	77.4153	1.38535e-18	3.3751e-18	1.2579e-14	7.41717e-15	1	-1	seq_var
GRMZM2G179301_T01	GRMZM2G179301	6	145279441	145284624	2358.85	1153.4	0.488966	-1.03219	413.728	5.65691e-92	3.95418e-91	5.13647e-88	4.40221e-88	1	-1	seq_var
GRMZM2G179473_T02	GRMZM2G179473	1	271186914	271196144	628.261	152.098	0.242093	-2.04636	290.547	3.77817e-65	1.92621e-64	3.43058e-61	2.75807e-61	1	-1	seq_var	cold_on; heat_on
GRMZM2G179528_T01	GRMZM2G179528	1	107854379	107859204	402.327	171.126	0.42534	-1.23331	93.2146	4.69214e-22	1.24139e-21	4.26046e-18	2.65059e-18	1	-1	seq_var
GRMZM2G179715_T03	GRMZM2G179715	3	144125259	144126604	313.95	27.2485	0.0867926	-3.52628	240.909	2.49173e-54	1.11508e-53	2.26249e-50	1.75717e-50	1	-1	seq_var
GRMZM2G179720_T01	GRMZM2G179720	8	19563886	19568064	2134.15	503.886	0.236106	-2.08249	1007.48	4.24941e-221	7.3077e-220	3.85847e-217	3.63452e-217	1	-1	seq_var
GRMZM2G179814_T01	GRMZM2G179814	8	147263113	147264543	455.538	161.352	0.354202	-1.49736	140.293	2.29741e-32	7.38162e-32	2.08605e-28	1.43703e-28	1	-1	seq_var
GRMZM2G179827_T01	GRMZM2G179827	2	47992349	47995559	597.629	239.628	0.400965	-1.31845	153.077	3.68555e-35	1.23944e-34	3.34648e-31	2.35175e-31	1	-1	seq_var	heat_off; salt_up
GRMZM2G180244_T01	GRMZM2G180244	10	2052395	2058076	1688.86	282.179	0.167083	-2.58137	1003.91	2.53461e-220	4.35053e-219	2.30143e-216	2.1676e-216	1	-1	seq_var	heat_up; salt_up
GRMZM2G180419_T01	GRMZM2G180419	5	214173248	214174677	1375.87	17.3256	0.0125924	-6.3113	1324.76	4.71117e-290	1.14378e-288	4.27774e-286	4.10202e-286	1	-1	seq_var
GRMZM2G180612_T02	GRMZM2G180612	2	60257952	60263985	4284.53	2043.26	0.476893	-1.06826	793.844	1.17626e-174	1.52578e-173	1.06805e-170	9.85824e-171	1	-1	seq_var
GRMZM2G180620_T04	GRMZM2G180620	3	28616308	28618631	339.751	29.5357	0.0869334	-3.52395	260.593	1.27446e-58	6.01774e-58	1.15721e-54	9.1226e-55	1	-1	seq_var
GRMZM2G180716_T04	GRMZM2G180716	10	125557112	125562254	422.824	199.519	0.471872	-1.08353	80.1249	3.5147e-19	8.66507e-19	3.19134e-15	1.89723e-15	1	-1	seq_var	heat_up; uv_down
GRMZM2G180847_T01	GRMZM2G180847	2	194071950	194077869	433.792	152.416	0.351358	-1.50899	135.058	3.20601e-31	1.00868e-30	2.91106e-27	1.98612e-27	1	-1	seq_var
GRMZM2G180930_T01	GRMZM2G180930	5	202867620	202870975	451.574	160.126	0.354596	-1.49575	138.862	4.7221e-32	1.50656e-31	4.28767e-28	2.94423e-28	1	-1	seq_var
GRMZM2G181081_T02	GRMZM2G181081	3	229992795	230004732	483.694	201.945	0.417505	-1.26014	115.779	5.31223e-27	1.55097e-26	4.82351e-23	3.17193e-23	1	-1	seq_var
GRMZM2G181522_T01	GRMZM2G181522	5	205332242	205336716	1185.29	534.197	0.450689	-1.1498	246.539	1.47549e-55	6.70881e-55	1.33975e-51	1.04524e-51	1	-1	seq_var
GRMZM2G181546_T01	GRMZM2G181546	10	2405084	2406195	5847.45	1632.37	0.279159	-1.84084	2375.32	0	0	0	0	1	-1	seq_var
GRMZM2G181551_T03	GRMZM2G181551	9	148483238	148484771	1240.79	587.414	0.473421	-1.0788	233.505	1.02552e-52	4.48756e-52	9.31168e-49	7.18476e-49	1	-1	seq_var	cold_up
GRMZM2G181568_T01	GRMZM2G181568	9	148538139	148542533	574.614	0	0	-Inf	574.614	5.5673e-127	5.2933e-126	5.0551e-123	4.52398e-123	1	-1	seq_var
GRMZM2G181637_T02	GRMZM2G181637	5	200652630	200654437	751.741	358.81	0.477305	-1.06702	139.026	4.34797e-32	1.38768e-31	3.94796e-28	2.7114e-28	1	-1	seq_var
GRMZM2G300424_T01	GRMZM2G300424	1	115768429	115770454	183.286	40.8422	0.222833	-2.16596	90.5294	1.82245e-21	4.76196e-21	1.65478e-17	1.02166e-17	1	-1	seq_var	cold_on
GRMZM2G300955_T01	GRMZM2G300955	2	177370536	177375918	927.046	135.881	0.146575	-2.77029	588.885	4.38048e-130	4.24944e-129	3.97747e-126	3.5679e-126	1	-1	seq_var
GRMZM2G301208_T01	GRMZM2G301208	5	12656522	12659949	1640.52	559.877	0.341281	-1.55097	530.714	1.97483e-117	1.74092e-116	1.79314e-113	1.58993e-113	1	-1	seq_var
GRMZM2G301805_T03	GRMZM2G301805	1	297992997	297995492	892.911	203.204	0.227575	-2.13559	433.983	2.20788e-96	1.62066e-95	2.00475e-92	1.73186e-92	1	-1	seq_var	cold_up
GRMZM2G301860_T01	GRMZM2G301860	9	16258284	16259458	313.35	85.2317	0.272002	-1.87831	130.558	3.09391e-30	9.5651e-30	2.80927e-26	1.9009e-26	1	-1	seq_var
GRMZM2G303105_T01	GRMZM2G303105	10	89232031	89237153	534.876	31.5318	0.0589515	-4.08433	447.303	2.78707e-99	2.09146e-98	2.53066e-95	2.19371e-95	1	-1	seq_var
GRMZM2G303147_T01	GRMZM2G303147	2	14833674	14834163	433.847	113.021	0.260508	-1.9406	188.217	7.78959e-43	2.97808e-42	7.07294e-39	5.2237e-39	1	-1	seq_var
GRMZM2G303655_T01	GRMZM2G303655	10	13166108	13181015	1470.87	126.533	0.0860261	-3.53908	1131.36	5.04135e-248	9.97288e-247	4.57755e-244	4.34666e-244	1	-1	seq_var
GRMZM2G304091_T02	GRMZM2G304091	8	1518905	1520989	1862.49	873.329	0.468905	-1.09263	357.639	9.19853e-80	5.546e-79	8.35227e-76	6.96789e-76	1	-1	seq_var
GRMZM2G304712_T01	GRMZM2G304712	4	235105068	235107110	2286.16	317.05	0.138682	-2.85015	1489.47	0	0	0	0	1	-1	seq_var	cold_up; salt_up
GRMZM2G305048_T01	GRMZM2G305048	3	3698440	3698944	630.006	193.477	0.307104	-1.7032	231.404	2.94501e-52	1.27946e-51	2.67407e-48	2.05886e-48	1	-1	seq_var
GRMZM2G305280_T01	GRMZM2G305280	7	159943753	159944792	243.312	87.0251	0.357669	-1.4833	73.9414	8.04697e-18	1.92028e-17	7.30665e-14	4.24558e-14	1	-1	seq_var
GRMZM2G305409_T01	GRMZM2G305409	4	89378986	89379868	241.002	104.476	0.433505	-1.20588	53.9527	2.05371e-13	4.31659e-13	1.86477e-09	9.7777e-10	1	-1	seq_var
GRMZM2G306851_T02	GRMZM2G306851	8	86549251	86557314	509.458	127.681	0.250622	-1.99642	228.763	1.10974e-51	4.77783e-51	1.00764e-47	7.73711e-48	1	-1	seq_var
GRMZM2G309063_T01	GRMZM2G309063	3	1628884	1633527	2031.18	943.925	0.464717	-1.10558	397.34	2.08897e-88	1.4092e-87	1.89679e-84	1.61582e-84	1	-1	seq_var
GRMZM2G309970_T01	GRMZM2G309970	7	162756581	162757593	923.516	443.505	0.480235	-1.05819	168.55	1.53424e-38	5.46954e-38	1.39309e-34	1.00247e-34	1	-1	seq_var
GRMZM2G310410_T01	GRMZM2G310410	4	153558602	153564260	237.483	37.9838	0.159943	-2.64437	144.482	2.78704e-33	9.08339e-33	2.53063e-29	1.75444e-29	1	-1	seq_var
GRMZM2G310552_T01	GRMZM2G310552	6	155322395	155323584	130.463	35.3493	0.270953	-1.88389	54.5593	1.50827e-13	3.18341e-13	1.3695e-09	7.208e-10	1	-1	seq_var	salt_up
GRMZM2G311919_T01	GRMZM2G311919	5	143222807	143237989	1017	347.373	0.341567	-1.54976	328.648	1.89317e-73	1.06903e-72	1.719e-69	1.41477e-69	1	-1	seq_var
GRMZM2G312438_T02	GRMZM2G312438	1	4035367	4039749	144.84	34.2767	0.236652	-2.07916	68.2473	1.44228e-16	3.32889e-16	1.30959e-12	7.42339e-13	1	-1	seq_var
GRMZM2G312738_T02	GRMZM2G312738	5	8186337	8196608	1161.41	287.221	0.247303	-2.01565	527.539	9.69204e-117	8.4619e-116	8.80037e-113	7.79337e-113	1	-1	seq_var
GRMZM2G312877_T01	GRMZM2G312877	8	79810748	79813394	826.869	374.386	0.452775	-1.14313	170.439	5.93178e-39	2.12551e-38	5.38605e-35	3.88354e-35	1	-1	seq_var	uv_up
GRMZM2G312910_T02	GRMZM2G312910	7	8470473	8472544	31305.3	6643.51	0.212217	-2.23639	16026.9	0	0	0	0	1	-1	seq_var
GRMZM2G315199_T01	GRMZM2G315199	6	156316174	156317944	1312.55	276.522	0.210675	-2.24691	675.462	6.48385e-149	7.06763e-148	5.88733e-145	5.34788e-145	1	-1	seq_var	cold_up; heat_up
GRMZM2G318213_T01	GRMZM2G318213	6	132453961	132454760	755.897	97.2352	0.128635	-2.95864	508.521	1.33041e-112	1.11956e-111	1.20801e-108	1.06459e-108	1	-1	seq_var
GRMZM2G319022_T01	GRMZM2G319022	1	5713200	5734294	1506.11	215.961	0.14339	-2.80198	966.56	3.33448e-212	5.426e-211	3.02771e-208	2.84198e-208	1	-1	seq_var
GRMZM2G320099_T01	GRMZM2G320099	1	3704159	3706769	1551.58	639.493	0.412157	-1.27873	379.676	1.46376e-84	9.44627e-84	1.32909e-80	1.12329e-80	1	-1	seq_var
GRMZM2G320802_T01	GRMZM2G320802	6	166662667	166676268	1165.46	547.124	0.469448	-1.09096	223.254	1.76438e-50	7.47579e-50	1.60206e-46	1.22413e-46	1	-1	seq_var
GRMZM2G322817_T01	GRMZM2G322817	2	14233437	14234345	1222.06	604.053	0.49429	-1.01657	209.151	2.10414e-47	8.57135e-47	1.91055e-43	1.44175e-43	1	-1	seq_var	heat_up
GRMZM2G322953_T03	GRMZM2G322953	8	100382637	100385781	4191.83	2053.82	0.489959	-1.02927	731.879	3.49588e-161	4.19876e-160	3.17426e-157	2.91032e-157	1	-1	seq_var
GRMZM2G323422_T01	GRMZM2G323422	9	6066508	6067263	392.928	146.628	0.373168	-1.4221	112.432	2.87301e-26	8.3e-26	2.60869e-22	1.70599e-22	1	-1	seq_var
GRMZM2G324886_T01	GRMZM2G324886	3	196083502	196088773	1325.26	124.107	0.0936474	-3.41662	995.45	1.75136e-218	2.96685e-217	1.59023e-214	1.49654e-214	1	-1	seq_var	heat_up; salt_up; uv_down
GRMZM2G324903_T01	GRMZM2G324903	8	58837906	58840227	769.18	181.73	0.236265	-2.08152	362.913	6.53687e-81	4.02405e-80	5.93548e-77	4.97194e-77	1	-1	seq_var	cold_up; uv_up
GRMZM2G325008_T01	GRMZM2G325008	7	152428022	152438295	723.088	276.064	0.381784	-1.38917	200.001	2.08778e-45	8.31084e-45	1.8957e-41	1.41969e-41	1	-1	seq_var
GRMZM2G325650_T01	GRMZM2G325650	6	103523306	103525146	2992.5	1119.44	0.374083	-1.41857	853.208	1.4593e-187	2.03853e-186	1.32504e-183	1.23034e-183	1	-1	seq_var	cold_down; heat_up; salt_down; uv_down
GRMZM2G326235_T01	GRMZM2G326235	5	1617726	1618754	3295.96	1447.6	0.439205	-1.18703	720.226	1.19525e-158	1.40764e-157	1.08529e-154	9.93257e-155	1	-1	seq_var
GRMZM2G327174_T01	GRMZM2G327174	1	220760709	220768108	2136.36	931.666	0.436101	-1.19727	473.034	7.0078e-105	5.54759e-104	6.36308e-101	5.55999e-101	1	-1	seq_var
GRMZM2G329040_T01	GRMZM2G329040	1	50625951	50650366	8805.42	2407.01	0.273356	-1.87115	3651.27	0	0	0	0	1	-1	seq_var
GRMZM2G329144_T01	GRMZM2G329144	9	128433759	128436569	2230.12	777.434	0.348606	-1.52033	701.667	1.29778e-154	1.47852e-153	1.17838e-150	1.07508e-150	1	-1	seq_var
GRMZM2G329909_T01	GRMZM2G329909	1	191885470	191889519	541.996	182.287	0.336327	-1.57207	178.645	9.57581e-41	3.52589e-40	8.69484e-37	6.3344e-37	1	-1	seq_var	heat_up; salt_up; uv_up
GRMZM2G329962_T01	GRMZM2G329962	4	68537491	68540538	689.668	234.095	0.339431	-1.55881	224.676	8.63925e-51	3.67765e-50	7.84444e-47	6.00255e-47	1	-1	seq_var
GRMZM2G330650_T02	GRMZM2G330650	1	63894558	63901034	418.433	182.613	0.436421	-1.19621	92.5239	6.65165e-22	1.75267e-21	6.0397e-18	3.7482e-18	1	-1	seq_var
GRMZM2G331833_T01	GRMZM2G331833	6	159575277	159581619	792.767	335.081	0.422673	-1.24239	185.731	2.71812e-42	1.02707e-41	2.46805e-38	1.81516e-38	1	-1	seq_var
GRMZM2G332505_T01	GRMZM2G332505	4	212528029	212530668	661.938	101.132	0.152782	-2.71045	412.154	1.24513e-91	8.67675e-91	1.13058e-87	9.68465e-88	1	-1	seq_var
GRMZM2G334791_T03	GRMZM2G334791	8	165727932	165735409	462.668	25.1637	0.0543881	-4.20056	392.369	2.52389e-87	1.68136e-86	2.29169e-83	1.94794e-83	1	-1	seq_var
GRMZM2G336065_T01	GRMZM2G336065	5	47846084	47856906	466.28	4.94361	0.0106022	-6.55949	451.657	3.14442e-100	2.38126e-99	2.85513e-96	2.47843e-96	1	-1	seq_var
GRMZM2G337128_T01	GRMZM2G337128	4	53704517	53705701	467.518	200.035	0.427866	-1.22477	107.178	4.06852e-25	1.14906e-24	3.69422e-21	2.38659e-21	1	-1	seq_var
GRMZM2G337706_T01	GRMZM2G337706	10	25037414	25038459	3163.42	997.389	0.315288	-1.66526	1127.59	3.32986e-247	6.50218e-246	3.02351e-243	2.86901e-243	1	-1	seq_var
GRMZM2G338696_T04	GRMZM2G338696	8	76159866	76162988	951.991	178.255	0.187244	-2.41701	529.679	3.31646e-117	2.91233e-116	3.01135e-113	2.66876e-113	1	-1	seq_var
GRMZM2G340447_T01	GRMZM2G340447	7	129801455	129801980	101.996	0	0	-Inf	101.996	5.5646e-24	1.5339e-23	5.05266e-20	3.22023e-20	1	-1	seq_var
GRMZM2G343563_T01	GRMZM2G343563	6	102900059	102901236	352.166	122.029	0.34651	-1.52903	111.691	4.17678e-26	1.20245e-25	3.79252e-22	2.47558e-22	1	-1	seq_var
GRMZM2G344630_T01	GRMZM2G344630	3	185988047	185989025	489.735	42.937	0.0876738	-3.51171	374.769	1.71378e-83	1.09278e-82	1.55611e-79	1.31224e-79	1	-1	seq_var	salt_up; uv_down
GRMZM2G344967_T01	GRMZM2G344967	4	168867433	168885815	2318.97	957.873	0.41306	-1.27558	565.357	5.74538e-125	5.40042e-124	5.21681e-121	4.66238e-121	1	-1	seq_var
GRMZM2G345238_T01	GRMZM2G345238	2	45175819	45179583	204.731	7.14917	0.0349198	-4.83981	184.248	5.72626e-42	2.15298e-41	5.19944e-38	3.81712e-38	1	-1	seq_var
GRMZM2G347043_T01	GRMZM2G347043	1	292162441	292164227	1527.75	636.211	0.416435	-1.26384	367.312	7.20352e-82	4.48614e-81	6.54079e-78	5.49124e-78	1	-1	seq_var	cold_up; heat_up; salt_up; uv_up
GRMZM2G347708_T01	GRMZM2G347708	1	60025060	60026859	456.319	13.7486	0.0301295	-5.05268	416.682	1.28747e-92	9.09742e-92	1.16902e-88	1.00371e-88	1	-1	seq_var
GRMZM2G348697_T01	GRMZM2G348697	6	136192798	136205147	1310.92	411.498	0.313901	-1.67162	469.664	3.79301e-104	2.97157e-103	3.44405e-100	3.00482e-100	1	-1	seq_var
GRMZM2G348866_T02	GRMZM2G348866	2	143678320	143684412	565.253	48.5431	0.0858786	-3.54156	434.98	1.33976e-96	9.84225e-96	1.2165e-92	1.05104e-92	1	-1	seq_var	salt_up
GRMZM2G350626_T02	GRMZM2G350626	5	40856166	40879122	6785.52	3272.2	0.482233	-1.0522	1227.26	7.26406e-269	1.60481e-267	6.59577e-265	6.29794e-265	1	-1	seq_var
GRMZM2G351125_T01	GRMZM2G351125	scaffold_507	135418	139778	708.876	294.704	0.415735	-1.26626	170.926	4.64427e-39	1.6668e-38	4.217e-35	3.04246e-35	1	-1	seq_var	cold_up
GRMZM2G351775_T01	GRMZM2G351775	8	87002356	87005747	805.584	115.224	0.143032	-2.80559	517.585	1.41892e-114	1.21317e-113	1.28838e-110	1.13784e-110	1	-1	seq_var
GRMZM2G352415_T03	GRMZM2G352415	1	297095586	297098393	863.768	279.47	0.323547	-1.62795	298.629	6.55254e-67	3.41153e-66	5.94971e-63	4.8076e-63	1	-1	seq_var	salt_up
GRMZM2G352855_T02	GRMZM2G352855	2	167872425	167874707	411.648	143.263	0.348022	-1.52275	129.806	4.51772e-30	1.39196e-29	4.10209e-26	2.77117e-26	1	-1	seq_var	cold_down; salt_down; uv_up
GRMZM2G353213_T02	GRMZM2G353213	10	118014969	118022281	939.547	158.004	0.16817	-2.57201	556.521	4.80253e-123	4.43611e-122	4.3607e-119	3.88909e-119	1	-1	seq_var
GRMZM2G354604_T02	GRMZM2G354604	6	165905112	165907597	10862.4	4820.69	0.443798	-1.17202	2327.46	0	0	0	0	1	-1	seq_var
GRMZM2G354610_T01	GRMZM2G354610	9	52349166	52351544	837.548	0.000596	7.11601e-07	-20.4224	837.546	3.70795e-184	5.07816e-183	3.36682e-180	3.12136e-180	1	-1	seq_var
GRMZM2G354909_T01	GRMZM2G354909	2	23800347	23805107	399.817	81.181	0.203045	-2.30013	211.08	7.98581e-48	3.27512e-47	7.25112e-44	5.48386e-44	1	-1	seq_var	heat_up; salt_up; uv_up
GRMZM2G355610_T01	GRMZM2G355610	8	64169897	64175469	2297.89	430.437	0.187319	-2.41643	1278.21	6.15043e-280	1.42102e-278	5.58459e-276	5.34349e-276	1	-1	seq_var
GRMZM2G355752_T01	GRMZM2G355752	2	234220402	234221935	1106.72	357.57	0.323091	-1.62999	383.273	2.41225e-85	1.57238e-84	2.19032e-81	1.85454e-81	1	-1	seq_var	cold_up; salt_up
GRMZM2G356404_T01	GRMZM2G356404	8	7867463	7870228	1070.98	163.113	0.152302	-2.71499	667.877	2.89291e-147	3.11597e-146	2.62676e-143	2.38318e-143	1	-1	seq_var
GRMZM2G356529_T01	GRMZM2G356529	8	175019959	175023270	1374.2	234.687	0.17078	-2.54979	807.078	1.55988e-177	2.05271e-176	1.41637e-173	1.30889e-173	1	-1	seq_var
GRMZM2G356839_T01	GRMZM2G356839	10	3169852	3173480	2020.41	90.3324	0.04471	-4.48326	1764.87	0	0	0	0	1	-1	seq_var
GRMZM2G358009_T01	GRMZM2G358009	3	138151050	138152140	59561.9	20441.5	0.343198	-1.54289	19129.3	0	0	0	0	1	-1	seq_var
GRMZM2G359038_T02	GRMZM2G359038	5	157562012	157565372	4276.57	45.4094	0.0106182	-6.55732	4142.26	0	0	0	0	1	-1	seq_var
GRMZM2G359127_T01	GRMZM2G359127	1	258942701	258943435	2282.53	693.188	0.303693	-1.71932	848.873	1.27794e-186	1.77971e-185	1.16037e-182	1.07718e-182	1	-1	seq_var
GRMZM2G359331_T01	GRMZM2G359331	2	13457365	13460437	892.797	71.6459	0.0802488	-3.63938	699.149	4.57864e-154	5.19027e-153	4.15741e-150	3.79112e-150	1	-1	seq_var
GRMZM2G360455_T01	GRMZM2G360455	5	91835196	91851559	670.804	139.306	0.20767	-2.26764	348.706	8.10715e-78	4.78628e-77	7.36129e-74	6.11522e-74	1	-1	seq_var
GRMZM2G361688_T01	GRMZM2G361688	8	158640659	158641264	515.496	243.16	0.471702	-1.08405	97.7603	4.72229e-23	1.27576e-22	4.28784e-19	2.70115e-19	1	-1	seq_var
GRMZM2G361847_T01	GRMZM2G361847	7	174267403	174273062	702.56	55.1594	0.0785121	-3.67094	553.143	2.6074e-122	2.3987e-121	2.36752e-118	2.11043e-118	1	-1	seq_var	salt_up
GRMZM2G362949_T01	GRMZM2G362949	3	22351565	22356412	1379.14	483.52	0.350595	-1.51212	430.641	1.17833e-95	8.60758e-95	1.06992e-91	9.23574e-92	1	-1	seq_var
GRMZM2G363460_T06	GRMZM2G363460	8	134991206	134995085	1880.59	586.291	0.311759	-1.6815	679.08	1.05931e-149	1.16166e-148	9.61857e-146	8.74252e-146	1	-1	seq_var	salt_up
GRMZM2G363893_T01	GRMZM2G363893	3	52452157	52454327	82.1609	18.7922	0.228724	-2.12832	39.7768	2.84703e-10	5.37555e-10	2.5851e-06	1.21625e-06	1	-1	seq_var
GRMZM2G364748_T01	GRMZM2G364748	10	68937177	68938935	3338.72	457.848	0.137133	-2.86636	2186.03	0	0	0	0	1	-1	seq_var	heat_down; salt_up
GRMZM2G365250_T01	GRMZM2G365250	2	204685902	204687441	253.18	42.3301	0.167193	-2.58041	150.444	1.38632e-34	4.61258e-34	1.25877e-30	8.80587e-31	1	-1	seq_var
GRMZM2G365515_T01	GRMZM2G365515	2	185411807	185413673	396.602	149.418	0.376746	-1.40834	111.901	3.75694e-26	1.08227e-25	3.4113e-22	2.22749e-22	1	-1	seq_var
GRMZM2G366065_T02	GRMZM2G366065	2	31828618	31847925	763.688	314.642	0.412004	-1.27927	186.995	1.43989e-42	5.46809e-42	1.30742e-38	9.63286e-39	1	-1	seq_var
GRMZM2G366146_T01	GRMZM2G366146	9	75591427	75597972	1154.23	431.268	0.373642	-1.42027	329.657	1.14133e-73	6.46088e-73	1.03633e-69	8.5337e-70	1	-1	seq_var	uv_up
GRMZM2G366638_T01	GRMZM2G366638	5	35412493	35414764	244.76	15.7981	0.0645453	-3.95354	201.197	1.14444e-45	4.57172e-45	1.03915e-41	7.79135e-42	1	-1	seq_var
GRMZM2G369652_T02	GRMZM2G369652	3	150308501	150311198	786.253	192.818	0.245236	-2.02775	359.693	3.28388e-80	1.98785e-79	2.98177e-76	2.48951e-76	1	-1	seq_var
GRMZM2G369912_T01	GRMZM2G369912	1	297451770	297457026	1571.51	163.431	0.103996	-3.2654	1142.8	1.64888e-250	3.29776e-249	1.49718e-246	1.42249e-246	1	-1	seq_var
GRMZM2G370048_T01	GRMZM2G370048	8	168687861	168692971	525.692	47.0718	0.0895426	-3.48128	399.951	5.64532e-89	3.83392e-88	5.12595e-85	4.37174e-85	1	-1	seq_var
GRMZM2G370745_T01	GRMZM2G370745	3	217067316	217070532	484.038	152.574	0.31521	-1.66561	172.583	2.01812e-39	7.2948e-39	1.83245e-35	1.3257e-35	1	-1	seq_var
GRMZM2G371695_T01	GRMZM2G371695	2	199798589	199798939	115.665	19.0805	0.164963	-2.59978	69.2312	8.75695e-17	2.03515e-16	7.95131e-13	4.53085e-13	1	-1	seq_var
GRMZM2G372398_T01	GRMZM2G372398	1	36501767	36518959	745.608	354.358	0.475261	-1.07321	139.165	4.05394e-32	1.29521e-31	3.68098e-28	2.52926e-28	1	-1	seq_var
GRMZM2G374085_T01	GRMZM2G374085	8	10392528	10394245	553.53	194.346	0.351103	-1.51004	172.506	2.09802e-39	7.57455e-39	1.905e-35	1.37756e-35	1	-1	seq_var
GRMZM2G375172_T01	GRMZM2G375172	5	140353397	140358190	1152	533.353	0.462978	-1.11098	227.091	2.56864e-51	1.10171e-50	2.33233e-47	1.7888e-47	1	-1	seq_var
GRMZM2G376074_T01	GRMZM2G376074	1	25149188	25170018	3938.32	105.843	0.0268751	-5.21759	3631.88	0	0	0	0	1	-1	seq_var
GRMZM2G378121_T01	GRMZM2G378121	2	209796249	209797246	756.138	277.35	0.366799	-1.44694	221.809	3.64532e-50	1.5388e-49	3.30995e-46	2.52621e-46	1	-1	seq_var
GRMZM2G379252_T01	GRMZM2G379252	2	230665667	230672075	554.898	219.449	0.395476	-1.33834	145.318	1.83036e-33	5.98692e-33	1.66197e-29	1.15404e-29	1	-1	seq_var
GRMZM2G379758_T01	GRMZM2G379758	2	7095602	7102600	3465.29	1217.39	0.35131	-1.50918	1079.09	1.15551e-236	2.14561e-235	1.0492e-232	9.92814e-233	1	-1	seq_var
GRMZM2G380319_T01	GRMZM2G380319	3	6648686	6649855	971.402	297.473	0.30623	-1.70731	357.94	7.91108e-80	4.77928e-79	7.18326e-76	5.99502e-76	1	-1	seq_var	salt_up
GRMZM2G380414_T01	GRMZM2G380414	8	16446360	16447123	61829.8	23784.7	0.384681	-1.37827	16906.3	0	0	0	0	1	-1	seq_var
GRMZM2G382104_T01	GRMZM2G382104	2	722491	732774	725.242	205.757	0.283707	-1.81752	289.866	5.31714e-65	2.70626e-64	4.82797e-61	3.87992e-61	1	-1	seq_var
GRMZM2G384327_T04	GRMZM2G384327	7	160062430	160067999	6472.35	3106.45	0.479957	-1.05902	1182.75	3.42716e-259	7.12097e-258	3.11186e-255	2.96244e-255	1	-1	seq_var
GRMZM2G384439_T01	GRMZM2G384439	10	71478004	71484046	1727.08	462.799	0.267966	-1.89988	729.909	9.37728e-161	1.12478e-159	8.51457e-157	7.80564e-157	1	-1	seq_var
GRMZM2G385605_T01	GRMZM2G385605	1	18273174	18293747	1548.27	82.8214	0.0534927	-4.22451	1316.63	2.74674e-288	6.58059e-287	2.49404e-284	2.39022e-284	1	-1	seq_var
GRMZM2G386125_T01	GRMZM2G386125	8	26568434	26587273	72.9629	15.1205	0.207236	-2.27065	37.9838	7.13352e-10	1.32296e-09	6.47723e-06	2.98538e-06	1	-1	seq_var
GRMZM2G389362_T01	GRMZM2G389362	2	152803245	152807106	1626.57	28.2936	0.0173947	-5.84521	1543.62	0	0	0	0	1	-1	seq_var	heat_up; salt_up
GRMZM2G391596_T01	GRMZM2G391596	5	189672280	189673399	593.462	64.934	0.109416	-3.19211	424.276	2.86275e-94	2.06628e-93	2.59938e-90	2.23953e-90	1	-1	seq_var
GRMZM2G392932_T01	GRMZM2G392932	3	156101071	156112908	186.43	55.5449	0.29794	-1.74691	70.7962	3.9609e-17	9.28367e-17	3.59649e-13	2.06244e-13	1	-1	seq_var
GRMZM2G393671_T01	GRMZM2G393671	7	165054074	165055852	1357.61	528.538	0.389315	-1.36099	364.426	3.06144e-81	1.89359e-80	2.77979e-77	2.33068e-77	1	-1	seq_var
GRMZM2G394212_T01	GRMZM2G394212	1	50093597	50096783	570.471	231.712	0.406177	-1.29982	143.056	5.71332e-33	1.85076e-32	5.18769e-29	3.58682e-29	1	-1	seq_var
GRMZM2G394450_T01	GRMZM2G394450	2	23504839	23509410	436.4	45.1064	0.10336	-3.27425	317.983	3.98363e-71	2.18955e-70	3.61714e-67	2.95944e-67	1	-1	seq_var
GRMZM2G398288_T01	GRMZM2G398288	9	131627588	131635485	4884.37	1273.96	0.260825	-1.93885	2116.65	0	0	0	0	1	-1	seq_var
GRMZM2G398781_T03	GRMZM2G398781	5	192613839	192615544	321.593	55.3608	0.172146	-2.5383	188.032	8.54868e-43	3.26417e-42	7.7622e-39	5.73018e-39	1	-1	seq_var
GRMZM2G398809_T01	GRMZM2G398809	5	187243604	187249709	217.747	24.7178	0.113517	-3.13902	153.672	2.73103e-35	9.20482e-35	2.47978e-31	1.74431e-31	1	-1	seq_var
GRMZM2G400167_T01	GRMZM2G400167	9	77335866	77339429	1969.54	101.266	0.0514161	-4.28164	1685.55	0	0	0	0	1	-1	seq_var
GRMZM2G400175_T01	GRMZM2G400175	9	77350715	77352988	270.66	64.1946	0.237178	-2.07596	127.303	1.59448e-29	4.8747e-29	1.44779e-25	9.74386e-26	1	-1	seq_var
GRMZM2G400238_T01	GRMZM2G400238	3	229284068	229298779	5622.47	1493.45	0.265621	-1.91256	2395.88	0	0	0	0	1	-1	seq_var
GRMZM2G400281_T01	GRMZM2G400281	5	18604046	18604971	646.751	297.189	0.459511	-1.12183	129.45	5.40492e-30	1.66192e-29	4.90766e-26	3.31213e-26	1	-1	seq_var
GRMZM2G400704_T01	GRMZM2G400704	2	109010482	109021953	64.0242	7.74894	0.121032	-3.04655	44.1238	3.08252e-11	6.03087e-11	2.79893e-07	1.36864e-07	1	-1	seq_var
GRMZM2G401050_T02	GRMZM2G401050	3	162744827	162752525	1137.28	297.813	0.261866	-1.9331	491.048	8.43101e-109	6.86579e-108	7.65535e-105	6.71614e-105	1	-1	seq_var
GRMZM2G401139_T01	GRMZM2G401139	6	123262870	123266244	1664.31	827.655	0.497297	-1.00782	280.897	4.78674e-63	2.3868e-62	4.34636e-59	3.47517e-59	1	-1	seq_var
GRMZM2G402002_T01	GRMZM2G402002	6	167630052	167639191	1548.8	417.639	0.269654	-1.89082	650.68	1.58924e-143	1.66632e-142	1.44303e-139	1.30556e-139	1	-1	seq_var
GRMZM2G405178_T02	GRMZM2G405178	9	18895247	18902504	1209.17	546.714	0.452138	-1.14517	249.933	2.68573e-56	1.23288e-55	2.43864e-52	1.90767e-52	1	-1	seq_var
GRMZM2G405690_T01	GRMZM2G405690	1	292782504	292786020	1845.02	917.54	0.497305	-1.0078	311.387	1.08922e-69	5.84868e-69	9.89012e-66	8.04933e-66	1	-1	seq_var
GRMZM2G407249_T02	GRMZM2G407249	1	194524205	194525924	1352.47	322.24	0.23826	-2.06939	633.767	7.57671e-140	7.74736e-139	6.87966e-136	6.2076e-136	1	-1	seq_var
GRMZM2G409343_T01	GRMZM2G409343	8	138179969	138181763	204.044	59.6996	0.292582	-1.77309	78.9986	6.21525e-19	1.52443e-18	5.64345e-15	3.34318e-15	1	-1	seq_var
GRMZM2G409753_T01	GRMZM2G409753	4	120666138	120668647	51.854	8.31968	0.160444	-2.63986	31.4962	1.99836e-08	3.51581e-08	0.000181451	7.83478e-05	1	-1	seq_var	cold_on
GRMZM2G409839_T01	GRMZM2G409839	1	292771349	292781723	1261.82	374.212	0.296566	-1.75357	481.557	9.79455e-107	7.8564e-106	8.89345e-103	7.78568e-103	1	-1	seq_var
GRMZM2G411333_T01	GRMZM2G411333	5	160200502	160205107	481.124	45.8235	0.0952426	-3.39225	359.593	3.45344e-80	2.08909e-79	3.13573e-76	2.61771e-76	1	-1	seq_var	cold_off; heat_up; salt_up
GRMZM2G411764_T01	GRMZM2G411764	4	173821634	173822427	378.23	171.035	0.4522	-1.14497	78.1581	9.51165e-19	2.32541e-18	8.63658e-15	5.1049e-15	1	-1	seq_var
GRMZM2G412161_T01	GRMZM2G412161	4	90250660	90251333	287.155	42.1667	0.146843	-2.76765	182.251	1.56294e-41	5.83533e-41	1.41915e-37	1.0392e-37	1	-1	seq_var	cold_on; salt_on
GRMZM2G412229_T01	GRMZM2G412229	5	12581434	12587551	1829.67	304.589	0.166472	-2.58665	1089.78	5.49888e-239	1.02948e-237	4.99298e-235	4.72684e-235	1	-1	seq_var
GRMZM2G412440_T01	GRMZM2G412440	2	71188620	71189391	211.127	91.6317	0.434012	-1.20419	47.1634	6.53076e-12	1.30644e-11	5.92993e-08	2.96627e-08	1	-1	seq_var
GRMZM2G412441_T01	GRMZM2G412441	2	71189333	71190522	1170.37	188.101	0.16072	-2.63738	710.246	1.76893e-156	2.0409e-155	1.60619e-152	1.46715e-152	1	-1	seq_var
GRMZM2G412888_T01	GRMZM2G412888	2	211499139	211504940	1421.1	516.215	0.36325	-1.46097	422.658	6.44131e-94	4.62715e-93	5.84871e-90	5.03517e-90	1	-1	seq_var
GRMZM2G413422_T01	GRMZM2G413422	4	40699033	40701775	75.2091	12.142	0.161443	-2.6309	45.5341	1.50001e-11	2.96476e-11	1.36201e-07	6.73055e-08	1	-1	seq_var	cold_up; salt_up
GRMZM2G413897_T01	GRMZM2G413897	3	20595877	20596906	2206.84	1079.27	0.489056	-1.03193	386.907	3.90229e-86	2.56573e-85	3.54328e-82	3.00476e-82	1	-1	seq_var	cold_down; salt_up; uv_down
GRMZM2G414047_T01	GRMZM2G414047	1	252053770	252055538	732.336	178.091	0.243181	-2.0399	337.411	2.33685e-75	1.34551e-74	2.12186e-71	1.75358e-71	1	-1	seq_var	salt_up
GRMZM2G414727_T01	GRMZM2G414727	1	224437176	224438294	724.716	336.968	0.464965	-1.10481	141.613	1.18145e-32	3.81084e-32	1.07275e-28	7.40294e-29	1	-1	seq_var	cold_up; salt_up; uv_up
GRMZM2G415359_T01	GRMZM2G415359	1	231398148	231403913	34062.7	8820.86	0.258959	-1.9492	14857.7	0	0	0	0	1	-1	seq_var
GRMZM2G415498_T01	GRMZM2G415498	5	1950146	1955235	287.384	88.8184	0.309058	-1.69405	104.806	1.34674e-24	3.76258e-24	1.22284e-20	7.85283e-21	1	-1	seq_var
GRMZM2G415846_T01	GRMZM2G415846	5	52415675	52424204	1926.65	776.216	0.402883	-1.31157	489.666	1.68431e-108	1.36916e-107	1.52935e-104	1.34138e-104	1	-1	seq_var
GRMZM2G416817_T01	GRMZM2G416817	8	5529776	5533826	491.621	242.008	0.492265	-1.02249	84.9294	3.09208e-20	7.83373e-20	2.80761e-16	1.69972e-16	1	-1	seq_var	cold_on; uv_on
GRMZM2G417287_T01	GRMZM2G417287	3	212767846	212768702	359.152	47.6914	0.132789	-2.91279	238.44	8.60579e-54	3.82292e-53	7.81405e-50	6.05589e-50	1	-1	seq_var	uv_up
GRMZM2G417682_T01	GRMZM2G417682	4	169825706	169831187	1462.49	680.89	0.46557	-1.10293	285.014	6.06605e-64	3.05151e-63	5.50798e-60	4.41366e-60	1	-1	seq_var
GRMZM2G417859_T01	GRMZM2G417859	4	240474602	240477107	484.89	231.401	0.477224	-1.06726	89.7074	2.76126e-21	7.18608e-21	2.50722e-17	1.5441e-17	1	-1	seq_var	cold_up
GRMZM2G418206_T01	GRMZM2G418206	5	135221284	135236032	1689.07	340.362	0.201509	-2.31108	896.314	6.21064e-197	9.21448e-196	5.63926e-193	5.25979e-193	1	-1	seq_var
GRMZM2G418689_T01	GRMZM2G418689	8	164124514	164128163	921.703	257.711	0.279603	-1.83855	373.817	2.76138e-83	1.75216e-82	2.50734e-79	2.11246e-79	1	-1	seq_var
GRMZM2G418752_T01	GRMZM2G418752	7	110942240	110947021	2005.04	713.344	0.355775	-1.49096	613.777	1.68744e-135	1.66724e-134	1.53219e-131	1.37729e-131	1	-1	seq_var
GRMZM2G419305_T01	GRMZM2G419305	4	82012772	82017958	1290.72	398.919	0.309066	-1.69401	470.702	2.25459e-104	1.77398e-103	2.04717e-100	1.78722e-100	1	-1	seq_var
GRMZM2G422464_T01	GRMZM2G422464	4	218670825	218688798	2575.89	874.093	0.339336	-1.55921	839.457	1.4243e-184	1.95653e-183	1.29327e-180	1.19926e-180	1	-1	seq_var
GRMZM2G423202_T01	GRMZM2G423202	3	209050563	209053343	720.157	194.08	0.269497	-1.89166	302.719	8.4225e-68	4.43084e-67	7.64763e-64	6.19475e-64	1	-1	seq_var
GRMZM2G424832_T01	GRMZM2G424832	7	18620330	18626341	3747.34	1576.24	0.420629	-1.24938	885.433	1.44062e-194	2.10303e-193	1.30808e-190	1.21862e-190	1	-1	seq_var
GRMZM2G426483_T01	GRMZM2G426483	6	117195254	117197344	452.266	188.482	0.41675	-1.26275	108.595	1.9907e-25	5.64509e-25	1.80756e-21	1.17033e-21	1	-1	seq_var
GRMZM2G427090_T02	GRMZM2G427090	7	168509909	168513127	292.449	0	0	-Inf	292.449	1.4553e-65	7.4404e-65	1.32141e-61	1.0631e-61	1	-1	seq_var
GRMZM2G428179_T01	GRMZM2G428179	8	173488367	173489603	755.23	288.167	0.381562	-1.39001	209.074	2.18714e-47	8.90548e-47	1.98592e-43	1.49841e-43	1	-1	seq_var
GRMZM2G428356_T01	GRMZM2G428356	5	26614237	26617409	944.876	313.406	0.331691	-1.59209	316.903	6.84654e-71	3.75176e-70	6.21666e-67	5.08287e-67	1	-1	seq_var
GRMZM2G429000_T01	GRMZM2G429000	10	138833997	138835213	493.769	219.542	0.444625	-1.16934	105.424	9.85929e-25	2.76218e-24	8.95223e-21	5.75782e-21	1	-1	seq_var
GRMZM2G429254_T01	GRMZM2G429254	2	23232111	23233220	387.69	76.3413	0.196913	-2.34437	208.904	2.38207e-47	9.69485e-47	2.16292e-43	1.63172e-43	1	-1	seq_var	cold_up; heat_off
GRMZM2G429442_T01	GRMZM2G429442	9	42120164	42125731	1310.45	291.986	0.222813	-2.16609	647.311	8.58981e-143	8.94444e-142	7.79955e-139	7.05138e-139	1	-1	seq_var
GRMZM2G429972_T01	GRMZM2G429972	9	137040737	137046420	1018.81	147.805	0.145076	-2.78512	650.299	1.92312e-143	2.01174e-142	1.74619e-139	1.57946e-139	1	-1	seq_var
GRMZM2G430807_T01	GRMZM2G430807	6	38070649	38072014	8725.87	2682.77	0.30745	-1.70158	3201	0	0	0	0	1	-1	seq_var
GRMZM2G430871_T01	GRMZM2G430871	6	149479675	149480789	1046.14	360.334	0.344442	-1.53767	334.403	1.05661e-74	6.04919e-74	9.59401e-71	7.91929e-71	1	-1	seq_var
GRMZM2G431039_T01	GRMZM2G431039	7	155109172	155111913	626.094	196.845	0.314402	-1.66932	223.898	1.27671e-50	5.41455e-50	1.15925e-46	8.86038e-47	1	-1	seq_var
GRMZM2G431350_T04	GRMZM2G431350	6	151981353	151983750	443.239	188.005	0.424162	-1.23731	103.2	3.02966e-24	8.38954e-24	2.75093e-20	1.75781e-20	1	-1	seq_var
GRMZM2G431703_T01	GRMZM2G431703	5	89889210	89897098	437.527	86.1809	0.196973	-2.34393	235.712	3.38606e-53	1.4925e-52	3.07454e-49	2.37735e-49	1	-1	seq_var
GRMZM2G431708_T02	GRMZM2G431708	6	118006137	118025981	671.969	110.274	0.164106	-2.6073	403.329	1.03815e-89	7.09285e-89	9.42639e-86	8.04773e-86	1	-1	seq_var
GRMZM2G433767_T02	GRMZM2G433767	7	170696489	170699600	507.793	251.142	0.494575	-1.01574	86.7926	1.20518e-20	3.08863e-20	1.0943e-16	6.67428e-17	1	-1	seq_var
GRMZM2G434252_T01	GRMZM2G434252	8	32606791	32609608	549.14	73.1033	0.133123	-2.90917	364.184	3.45571e-81	2.13455e-80	3.13779e-77	2.63014e-77	1	-1	seq_var
GRMZM2G436947_T01	GRMZM2G436947	6	111852171	111853018	580.748	128.806	0.221793	-2.17271	287.859	1.45543e-64	7.38286e-64	1.32153e-60	1.06116e-60	1	-1	seq_var
GRMZM2G438202_T01	GRMZM2G438202	10	141249356	141251027	899.569	355.409	0.395088	-1.33975	235.948	3.00719e-53	1.32679e-52	2.73053e-49	2.11195e-49	1	-1	seq_var	cold_up; heat_up; salt_up
GRMZM2G440208_T01	GRMZM2G440208	4	18596164	18598086	1292.99	406.643	0.314498	-1.66888	462.223	1.5778e-102	1.2172e-101	1.43264e-98	1.24709e-98	1	-1	seq_var
GRMZM2G441144_T02	GRMZM2G441144	4	177376776	177378440	196.683	45.7052	0.23238	-2.10544	94.0404	3.09147e-22	8.20296e-22	2.80705e-18	1.74946e-18	1	-1	seq_var	cold_up; salt_off
GRMZM2G441656_T01	GRMZM2G441656	6	130064006	130065055	3749.25	1259.61	0.335964	-1.57362	1237.46	4.40084e-271	9.89099e-270	3.99596e-267	3.81861e-267	1	-1	seq_var
GRMZM2G441903_T01	GRMZM2G441903	1	187432434	187434251	2932.01	1159.6	0.395497	-1.33826	767.773	5.48153e-169	6.89367e-168	4.97723e-165	4.58201e-165	1	-1	seq_var	heat_up
GRMZM2G442472_T01	GRMZM2G442472	1	273074243	273076215	237.148	47.8185	0.20164	-2.31015	125.789	3.42027e-29	1.03901e-28	3.10561e-25	2.08363e-25	1	-1	seq_var	salt_up; uv_up
GRMZM2G442551_T01	GRMZM2G442551	9	90709327	90713727	712.837	243.689	0.341858	-1.54853	230.103	5.66045e-52	2.4498e-51	5.13969e-48	3.95269e-48	1	-1	seq_var
GRMZM2G443939_T02	GRMZM2G443939	10	3700999	3705531	3079.75	946.436	0.30731	-1.70224	1130.36	8.34128e-248	1.64292e-246	7.57388e-244	7.19018e-244	1	-1	seq_var
GRMZM2G445163_T02	GRMZM2G445163	2	229540315	229543942	576.902	180.241	0.31243	-1.6784	207.807	4.13362e-47	1.67934e-46	3.75333e-43	2.82988e-43	1	-1	seq_var
GRMZM2G446050_T01	GRMZM2G446050	2	191074141	191081643	1543.02	691.388	0.448073	-1.15819	324.597	1.444e-72	8.08855e-72	1.31115e-68	1.07723e-68	1	-1	seq_var
GRMZM2G447745_T01	GRMZM2G447745	6	26908013	26915169	6234.01	2279.46	0.36565	-1.45147	1836.9	0	0	0	0	1	-1	seq_var
GRMZM2G448104_T02	GRMZM2G448104	10	142938814	142965743	2574.46	624.704	0.242654	-2.04303	1188.3	2.13224e-260	4.44054e-259	1.93608e-256	1.84332e-256	1	-1	seq_var
GRMZM2G449274_T01	GRMZM2G449274	1	176868521	176872951	187.541	64.2185	0.342424	-1.54615	60.4087	7.70728e-15	1.69777e-14	6.99821e-11	3.82204e-11	1	-1	seq_var
GRMZM2G449552_T01	GRMZM2G449552	3	128244898	128245498	122.176	0	0	-Inf	122.176	2.11206e-28	6.32921e-28	1.91775e-24	1.27801e-24	1	-1	seq_var
GRMZM2G450233_T02	GRMZM2G450233	6	125337844	125340056	1771.95	778.011	0.439071	-1.18747	387.421	3.01477e-86	1.98363e-85	2.73741e-82	2.32168e-82	1	-1	seq_var	cold_up
GRMZM2G452529_T01	GRMZM2G452529	3	195946192	195961959	2808.29	177.982	0.0633773	-3.97989	2316.78	0	0	0	0	1	-1	seq_var
GRMZM2G456000_T02	GRMZM2G456000	8	78524082	78528760	2726.89	1139.37	0.417827	-1.25902	651.852	8.83767e-144	9.2985e-143	8.0246e-140	7.2628e-140	1	-1	seq_var	heat_up; salt_up
GRMZM2G456357_T01	GRMZM2G456357	1	151514959	151516930	843.841	294.898	0.349471	-1.51676	264.625	1.68403e-59	8.02678e-59	1.5291e-55	1.20846e-55	1	-1	seq_var	cold_up
GRMZM2G458266_T02	GRMZM2G458266	5	2524531	2535342	419.747	69.0895	0.164598	-2.60298	251.537	1.20048e-56	5.53597e-56	1.09003e-52	8.53779e-53	1	-1	seq_var
GRMZM2G458824_T03	GRMZM2G458824	1	140993644	140996019	550.689	264.694	0.48066	-1.05691	100.313	1.30148e-23	3.56269e-23	1.18174e-19	7.50173e-20	1	-1	seq_var
GRMZM2G459391_T01	GRMZM2G459391	1	214284589	214291336	3898.45	672.959	0.172622	-2.53431	2275.84	0	0	0	0	1	-1	seq_var	salt_up; uv_off
GRMZM2G460012_T01	GRMZM2G460012	1	225310766	225317140	372.601	33.0871	0.0888004	-3.49329	284.134	9.43746e-64	4.73699e-63	8.56921e-60	6.86292e-60	1	-1	seq_var
GRMZM2G461936_T02	GRMZM2G461936	5	13611800	13618574	73.8776	0.968544	0.0131101	-6.25317	71.0221	3.53251e-17	8.2946e-17	3.20752e-13	1.84185e-13	1	-1	seq_var
GRMZM2G462639_T01	GRMZM2G462639	5	96430593	96440162	1917.94	172.416	0.0898961	-3.4756	1457.58	0	0	0	0	1	-1	seq_var
GRMZM2G463318_T01	GRMZM2G463318	1	256618835	256619637	926.003	323.51	0.349362	-1.51721	290.511	3.84764e-65	1.96053e-64	3.49366e-61	2.80839e-61	1	-1	seq_var	heat_up; salt_up; uv_down
GRMZM2G464782_T03	GRMZM2G464782	1	277099198	277103008	823.027	299.379	0.363753	-1.45897	244.303	4.53325e-55	2.04888e-54	4.11619e-51	3.20591e-51	1	-1	seq_var
GRMZM2G465333_T01	GRMZM2G465333	9	129449240	129451409	433.634	138.282	0.318892	-1.64886	152.527	4.86092e-35	1.63048e-34	4.41372e-31	3.09835e-31	1	-1	seq_var
GRMZM2G466270_T01	GRMZM2G466270	5	65470804	65484230	1915.53	846.089	0.4417	-1.17886	414.143	4.59594e-92	3.21503e-91	4.17311e-88	3.57702e-88	1	-1	seq_var
GRMZM2G466460_T01	GRMZM2G466460	1	213178956	213180497	80.3182	1.24496	0.0155003	-6.01156	76.6594	2.03139e-18	4.92261e-18	1.8445e-14	1.08354e-14	1	-1	seq_var
GRMZM2G466543_T01	GRMZM2G466543	2	166506882	166509171	1075.32	146.18	0.135942	-2.87894	706.752	1.0174e-155	1.16642e-154	9.23801e-152	8.43324e-152	1	-1	seq_var	uv_up
GRMZM2G467007_T02	GRMZM2G467007	9	154577322	154581167	1680.97	451.071	0.268339	-1.89787	709.488	2.58457e-156	2.97816e-155	2.34679e-152	2.14338e-152	1	-1	seq_var
GRMZM2G467338_T01	GRMZM2G467338	2	115513701	115521002	1769.23	479.92	0.27126	-1.88225	739.087	9.46839e-163	1.15245e-161	8.59729e-159	7.8919e-159	1	-1	seq_var	heat_down; salt_up
GRMZM2G467356_T01	GRMZM2G467356	7	139175405	139176522	1492.54	535.644	0.358882	-1.47842	451.46	3.47087e-100	2.6241e-99	3.15155e-96	2.73504e-96	1	-1	seq_var
GRMZM2G469142_T01	GRMZM2G469142	5	213964193	213966299	5759.27	2872.29	0.498725	-1.00368	965.6	5.39211e-212	8.74292e-211	4.89604e-208	4.59462e-208	1	-1	seq_var
GRMZM2G470292_T01	GRMZM2G470292	8	139411959	139422541	1245.15	504.584	0.405241	-1.30315	313.438	3.89349e-70	2.10811e-69	3.53529e-66	2.88274e-66	1	-1	seq_var
GRMZM2G472087_T01	GRMZM2G472087	9	110875571	110877812	494.427	215.2	0.435251	-1.20008	109.872	1.04541e-25	2.98124e-25	9.49228e-22	6.16475e-22	1	-1	seq_var
GRMZM2G472248_T01	GRMZM2G472248	3	36311866	36312838	5260.98	959.847	0.182446	-2.45445	2973.84	0	0	0	0	1	-1	seq_var	cold_up; heat_up; salt_up
GRMZM2G472991_T02	GRMZM2G472991	8	164284560	164291666	591.209	281.097	0.475462	-1.0726	110.247	8.64957e-26	2.47286e-25	7.85381e-22	5.10757e-22	1	-1	seq_var
GRMZM2G474119_T01	GRMZM2G474119	4	225417946	225420179	823.803	203.325	0.246813	-2.01851	374.825	1.66627e-83	1.06323e-82	1.51297e-79	1.27603e-79	1	-1	seq_var	salt_up; uv_off
GRMZM2G474462_T01	GRMZM2G474462	2	216709894	216711451	2017.44	533.39	0.264389	-1.91926	863.407	8.84748e-190	1.25524e-188	8.03351e-186	7.46816e-186	1	-1	seq_var
GRMZM2G474798_T01	GRMZM2G474798	1	289646406	289669951	4366.67	1812.6	0.4151	-1.26847	1055.67	1.42613e-231	2.59504e-230	1.29493e-227	1.22391e-227	1	-1	seq_var
GRMZM2G475683_T01	GRMZM2G475683	4	178275310	178276595	146.504	1.14825	0.00783763	-6.99537	143.095	5.6023e-33	1.8161e-32	5.08688e-29	3.51824e-29	1	-1	seq_var
GRMZM2G476009_T01	GRMZM2G476009	8	170885631	170888485	1875.02	621.865	0.331659	-1.59223	628.939	8.5011e-139	8.56715e-138	7.719e-135	6.9539e-135	1	-1	seq_var
GRMZM2G477236_T03	GRMZM2G477236	5	73153963	73162312	413.303	155.494	0.376224	-1.41034	116.852	3.09261e-27	9.06712e-27	2.80809e-23	1.85062e-23	1	-1	seq_var
GRMZM2G477846_T01	GRMZM2G477846	5	49860085	49860853	516.492	133.726	0.258913	-1.94946	225.324	6.24063e-51	2.66533e-50	5.6665e-47	4.34036e-47	1	-1	seq_var
GRMZM2G477847_T01	GRMZM2G477847	8	134883164	134885822	553.106	183.673	0.332076	-1.59041	185.239	3.48024e-42	1.31123e-41	3.16006e-38	2.32167e-38	1	-1	seq_var
GRMZM2G478709_T01	GRMZM2G478709	4	179677461	179679867	2894.93	817.725	0.282468	-1.82384	1162.18	1.00965e-254	2.05553e-253	9.16767e-251	8.71837e-251	1	-1	seq_var
GRMZM2G480607_T05	GRMZM2G480607	3	223647070	223655193	1928.51	606.121	0.314295	-1.66981	689.928	4.63441e-152	5.17594e-151	4.20804e-148	3.83173e-148	1	-1	seq_var
GRMZM2G488458_T01	GRMZM2G488458	7	149755602	149762339	741.962	79.0784	0.10658	-3.22999	535.192	2.09568e-118	1.87291e-117	1.90288e-114	1.69017e-114	1	-1	seq_var
GRMZM2G488465_T01	GRMZM2G488465	4	196638953	196642916	613.308	274.339	0.44731	-1.16065	129.443	5.42393e-30	1.66721e-29	4.92493e-26	3.32324e-26	1	-1	seq_var	cold_up
GRMZM2G489119_T01	GRMZM2G489119	3	222928409	222930027	188.262	61.944	0.329031	-1.6037	63.7723	1.39666e-15	3.13824e-15	1.26816e-11	7.03915e-12	1	-1	seq_var	cold_up; salt_up; uv_up
GRMZM2G491632_T01	GRMZM2G491632	1	202344235	202350079	392.52	192.596	0.490665	-1.02719	68.3106	1.39668e-16	3.22529e-16	1.26818e-12	7.19149e-13	1	-1	seq_var
GRMZM2G492296_T01	GRMZM2G492296	8	65971718	65973228	434.45	180.439	0.415327	-1.26768	104.933	1.26367e-24	3.53267e-24	1.14741e-20	7.37098e-21	1	-1	seq_var
GRMZM2G493549_T01	GRMZM2G493549	5	74691081	74692185	264.752	109.581	0.413901	-1.27264	64.3224	1.05637e-15	2.38012e-15	9.59188e-12	5.33575e-12	1	-1	seq_var
GRMZM2G497531_T02	GRMZM2G497531	5	115622350	115626295	993.259	372.918	0.375449	-1.41331	281.679	3.23382e-63	1.61336e-62	2.93631e-59	2.34808e-59	1	-1	seq_var
GRMZM2G499981_T01	GRMZM2G499981	4	16076396	16077852	92.5316	10.5782	0.11432	-3.12885	65.1378	6.98394e-16	1.58179e-15	6.34142e-12	3.54225e-12	1	-1	seq_var	cold_on
GRMZM2G501099_T01	GRMZM2G501099	9	1749987	1750698	35.6171	0	0	-Inf	35.6171	2.40167e-09	4.38599e-09	2.18072e-05	9.86846e-06	1	-1	seq_var	cold_off; salt_up
GRMZM2G502560_T01	GRMZM2G502560	3	119196612	119197694	1051.26	168.931	0.160694	-2.63761	638.019	9.01193e-141	9.26709e-140	8.18284e-137	7.38798e-137	1	-1	seq_var
GRMZM2G510387_T01	GRMZM2G510387	9	126860669	126861187	105.266	2.43244	0.0231075	-5.4355	98.1889	3.80314e-23	1.0299e-22	3.45325e-19	2.17844e-19	1	-1	seq_var	cold_on; uv_off
GRMZM2G512386_T03	GRMZM2G512386	3	134895644	134898839	776.909	95.4669	0.12288	-3.02467	532.298	8.93452e-118	7.93015e-117	8.11255e-114	7.19944e-114	1	-1	seq_var
GRMZM2G519073_T01	GRMZM2G519073	8	14703512	14706122	772.845	316.056	0.408952	-1.29	191.621	1.40795e-43	5.42622e-43	1.27842e-39	9.46845e-40	1	-1	seq_var	cold_up; heat_up; salt_up
GRMZM2G527017_T01	GRMZM2G527017	8	21599697	21601434	696.858	137.755	0.19768	-2.33876	374.54	1.92141e-83	1.22345e-82	1.74464e-79	1.47084e-79	1	-1	seq_var	cold_on; uv_on
GRMZM2G533147_T01	GRMZM2G533147	1	185259308	185260112	369.402	0	0	-Inf	369.402	2.52535e-82	1.58686e-81	2.29302e-78	1.92836e-78	1	-1	seq_var	cold_down; salt_up
GRMZM2G542847_T01	GRMZM2G542847	4	78008711	78010138	59.7941	2.6235	0.0438756	-4.51044	52.3647	4.60932e-13	9.57508e-13	4.18527e-09	2.17099e-09	1	-1	seq_var	uv_up
GRMZM2G551565_T01	GRMZM2G551565	5	92406035	92406722	245.927	1.13083	0.00459823	-7.76471	242.555	1.09038e-54	4.91106e-54	9.90069e-51	7.70356e-51	1	-1	seq_var	cold_down; salt_up; uv_down
GRMZM2G553314_T01	GRMZM2G553314	5	14769808	14778577	2026.81	595.632	0.293877	-1.76671	781.051	7.11089e-172	9.14545e-171	6.45669e-168	5.95537e-168	1	-1	seq_var
GRMZM2G553687_T01	GRMZM2G553687	6	112447250	112459445	3385.02	1542.39	0.455651	-1.134	689.062	7.1499e-152	7.97557e-151	6.49211e-148	5.91083e-148	1	-1	seq_var
GRMZM2G558539_T02	GRMZM2G558539	6	127957401	127970074	4055.24	1928.08	0.475455	-1.07262	756.233	1.77046e-166	2.20216e-165	1.60758e-162	1.47851e-162	1	-1	seq_var
GRMZM2G570790_T01	GRMZM2G570790	10	47824608	47826754	1009.66	480.472	0.475877	-1.07134	187.927	9.01196e-43	3.43673e-42	8.18286e-39	6.03801e-39	1	-1	seq_var
GRMZM2G573324_T01	GRMZM2G573324	8	67600949	67602666	530.404	70.4613	0.132845	-2.91219	352.071	1.50046e-78	8.91635e-78	1.36242e-74	1.1333e-74	1	-1	seq_var
GRMZM2G573867_T02	GRMZM2G573867	2	197010247	197013583	846.905	318.655	0.376258	-1.41021	239.412	5.28365e-54	2.35636e-53	4.79755e-50	3.72233e-50	1	-1	seq_var
GRMZM2G576752_T01	GRMZM2G576752	9	15911606	15915671	605.654	161.398	0.266485	-1.90787	257.302	6.64841e-58	3.10852e-57	6.03675e-54	4.7463e-54	1	-1	seq_var
GRMZM2G577405_T01	GRMZM2G577405	7	165058380	165067972	182.05	58.9101	0.323593	-1.62775	62.9291	2.14286e-15	4.78886e-15	1.94571e-11	1.07529e-11	1	-1	seq_var
GRMZM2G582965_T01	GRMZM2G582965	3	192845013	192851611	923.319	201.695	0.218445	-2.19466	462.876	1.13795e-102	8.80871e-102	1.03326e-98	8.99894e-99	1	-1	seq_var
GRMZM2G587231_T01	GRMZM2G587231	3	71647112	71650348	726.982	71.4073	0.0982243	-3.34778	538.307	4.40347e-119	3.96269e-118	3.99835e-115	3.55448e-115	1	-1	seq_var
GRMZM2G590971_T01	GRMZM2G590971	8	161332355	161332992	90.1108	0	0	-Inf	90.1108	2.2519e-21	5.86891e-21	2.04473e-17	1.26039e-17	1	-1	seq_var
GRMZM2G701286_T01	GRMZM2G701286	5	3392345	3393065	316.871	62.53	0.197336	-2.34127	170.504	5.74348e-39	2.05886e-38	5.21508e-35	3.76083e-35	1	-1	seq_var	uv_up
GRMZM2G702889_T01	GRMZM2G702889	2	2990466	2994626	677.632	207.72	0.306539	-1.70586	249.411	3.48973e-56	1.59873e-55	3.16867e-52	2.47736e-52	1	-1	seq_var	cold_up
GRMZM2G703783_T01	GRMZM2G703783	1	161925333	161927948	331.065	0	0	-Inf	331.065	5.63527e-74	3.20002e-73	5.11683e-70	4.21631e-70	1	-1	seq_var	cold_up
GRMZM5G800112_T01	GRMZM5G800112	1	220650222	220653755	4535.66	1776.11	0.391587	-1.35259	1206.5	2.35884e-264	5.05148e-263	2.14183e-260	2.04205e-260	1	-1	seq_var
GRMZM5G801409_T04	GRMZM5G801409	1	40808293	40811525	1526.63	734.961	0.481426	-1.05461	277.125	3.17773e-62	1.56729e-61	2.88538e-58	2.30068e-58	1	-1	seq_var
GRMZM5G801949_T02	GRMZM5G801949	7	157477245	157479675	2272.2	1110.16	0.488585	-1.03332	399.227	8.1123e-89	5.49699e-88	7.36597e-85	6.27973e-85	1	-1	seq_var	salt_down; uv_up
GRMZM5G803334_T01	GRMZM5G803334	4	909819	910536	343.285	43.6005	0.12701	-2.97699	232.138	2.03761e-52	8.86511e-52	1.85015e-48	1.4251e-48	1	-1	seq_var
GRMZM5G803433_T01	GRMZM5G803433	8	142540246	142543873	408.243	203.382	0.498188	-1.00524	68.6174	1.19544e-16	2.76833e-16	1.08546e-12	6.16848e-13	1	-1	seq_var
GRMZM5G803874_T04	GRMZM5G803874	10	138512812	138515509	4396.32	1710.31	0.389033	-1.36203	1181.44	6.59209e-259	1.36037e-257	5.98562e-255	5.69623e-255	1	-1	seq_var
GRMZM5G803992_T05	GRMZM5G803992	10	10825169	10831179	1143.78	365.74	0.319764	-1.64492	401.02	3.30339e-89	2.25186e-88	2.99948e-85	2.55979e-85	1	-1	seq_var
GRMZM5G806818_T01	GRMZM5G806818	6	96289443	96290110	120.841	21.9529	0.181667	-2.46063	68.4826	1.28004e-16	2.95896e-16	1.16228e-12	6.59606e-13	1	-1	seq_var
GRMZM5G807064_T02	GRMZM5G807064	3	168962328	168966124	607.758	223.886	0.36838	-1.44073	177.188	1.99221e-40	7.30881e-40	1.80893e-36	1.31606e-36	1	-1	seq_var
GRMZM5G809184_T01	GRMZM5G809184	8	171556725	171557778	832.597	380.421	0.456909	-1.13002	168.557	1.5287e-38	5.45193e-38	1.38806e-34	9.99007e-35	1	-1	seq_var
GRMZM5G809417_T01	GRMZM5G809417	4	25275687	25278011	198.034	0	0	-Inf	198.034	5.60831e-45	2.21792e-44	5.09234e-41	3.80524e-41	1	-1	seq_var
GRMZM5G809727_T01	GRMZM5G809727	5	105243288	105245827	191.979	13.9843	0.0728431	-3.77906	153.824	2.53062e-35	8.54203e-35	2.29781e-31	1.61732e-31	1	-1	seq_var
GRMZM5G811749_T01	GRMZM5G811749	Pt	3363	5604	493.512	4.1e-05	8.3078e-08	-23.521	493.512	2.45239e-109	2.0079e-108	2.22677e-105	1.95504e-105	1	-1	seq_var
GRMZM5G813783_T01	GRMZM5G813783	10	149032610	149033859	1489.48	620.024	0.416268	-1.26441	358.357	6.4156e-80	3.87841e-79	5.82537e-76	4.86239e-76	1	-1	seq_var
GRMZM5G814164_T01	GRMZM5G814164	7	85900423	85906787	269.01	121.797	0.452762	-1.14317	55.4531	9.57166e-14	2.03181e-13	8.69106e-10	4.59822e-10	1	-1	seq_var
GRMZM5G814700_T02	GRMZM5G814700	5	166092662	166095266	4402.31	472.908	0.107423	-3.21863	3167.08	0	0	0	0	1	-1	seq_var
GRMZM5G815353_T02	GRMZM5G815353	10	104502202	104506544	591.406	197.662	0.334224	-1.58111	196.478	1.22599e-44	4.80655e-44	1.1132e-40	8.29381e-41	1	-1	seq_var
GRMZM5G816791_T01	GRMZM5G816791	9	147341819	147344192	879.502	234.012	0.266073	-1.91011	374.182	2.29913e-83	1.46089e-82	2.08761e-79	1.75929e-79	1	-1	seq_var
GRMZM5G816891_T01	GRMZM5G816891	3	1350424	1354993	616.481	126.426	0.205077	-2.28576	323.262	2.8208e-72	1.57327e-71	2.56129e-68	2.10234e-68	1	-1	seq_var
GRMZM5G820808_T01	GRMZM5G820808	8	85177788	85182310	671.147	59.1533	0.0881376	-3.5041	512.853	1.51907e-113	1.28788e-112	1.37932e-109	1.21678e-109	1	-1	seq_var
GRMZM5G821637_T02	GRMZM5G821637	1	298768924	298771703	635.283	250.449	0.394233	-1.34288	167.203	3.02088e-38	1.06772e-37	2.74296e-34	1.9672e-34	1	-1	seq_var
GRMZM5G821828_T01	GRMZM5G821828	1	226836898	226839806	4308.68	1884.26	0.437318	-1.19325	949.113	2.06764e-208	3.29951e-207	1.87742e-204	1.75998e-204	1	-1	seq_var
GRMZM5G823318_T07	GRMZM5G823318	5	21366640	21370672	1699.43	281.725	0.165776	-2.5927	1014.51	1.26155e-222	2.18605e-221	1.14549e-218	1.07951e-218	1	-1	seq_var
GRMZM5G823750_T05	GRMZM5G823750	5	33304327	33307828	859.319	370.012	0.430587	-1.21562	194.758	2.90985e-44	1.13397e-43	2.64214e-40	1.96444e-40	1	-1	seq_var
GRMZM5G824600_T02	GRMZM5G824600	5	215541812	215545867	2802.26	1215.97	0.433927	-1.20448	626.22	3.31899e-138	3.32265e-137	3.01364e-134	2.71294e-134	1	-1	seq_var
GRMZM5G826666_T02	GRMZM5G826666	8	129229012	129231037	791.258	309.691	0.39139	-1.35332	210.643	9.9454e-48	4.07143e-47	9.03043e-44	6.82553e-44	1	-1	seq_var
GRMZM5G827342_T01	GRMZM5G827342	9	90336015	90336910	146.38	0	0	-Inf	146.38	1.07211e-33	3.52072e-33	9.7348e-30	6.77148e-30	1	-1	seq_var
GRMZM5G829297_T01	GRMZM5G829297	8	171675840	171677793	879.798	353.493	0.401788	-1.31549	224.6	8.97489e-51	3.81695e-50	8.1492e-47	6.23396e-47	1	-1	seq_var
GRMZM5G829337_T01	GRMZM5G829337	5	45616675	45617120	157.964	2.13658	0.0135258	-6.20815	151.668	7.48834e-35	2.50347e-34	6.79941e-31	4.76633e-31	1	-1	seq_var
GRMZM5G829840_T05	GRMZM5G829840	2	6642458	6645990	3181.4	0.046162	1.451e-05	-16.0726	3181.26	0	0	0	0	1	-1	seq_var
GRMZM5G830874_T05	GRMZM5G830874	9	150704772	150712218	6627.44	1510.88	0.227974	-2.13306	3216.77	0	0	0	0	1	-1	seq_var
GRMZM5G832805_T01	GRMZM5G832805	4	187592297	187595039	232.492	31.7414	0.136527	-2.87274	152.52	4.87842e-35	1.63575e-34	4.42961e-31	3.10902e-31	1	-1	seq_var
GRMZM5G833032_T03	GRMZM5G833032	5	196333385	196347387	895.655	169.223	0.188938	-2.40402	495.553	8.82012e-110	7.23457e-109	8.00867e-106	7.03316e-106	1	-1	seq_var
GRMZM5G833578_T01	GRMZM5G833578	4	223176156	223177674	181.555	0	0	-Inf	181.555	2.21735e-41	8.26161e-41	2.01335e-37	1.47321e-37	1	-1	seq_var
GRMZM5G834952_T01	GRMZM5G834952	4	237452446	237453056	6399.79	726.086	0.113455	-3.13981	4517.47	0	0	0	0	1	-1	seq_var	cold_up; uv_down
GRMZM5G835542_T01	GRMZM5G835542	4	155857959	155859966	975.935	462.622	0.474029	-1.07695	183.163	9.88018e-42	3.70099e-41	8.9712e-38	6.57723e-38	1	-1	seq_var
GRMZM5G836378_T01	GRMZM5G836378	5	207085994	207090618	1224.81	128.219	0.104685	-3.25588	888.757	2.72795e-195	3.99512e-194	2.47698e-191	2.30812e-191	1	-1	seq_var
GRMZM5G836628_T02	GRMZM5G836628	2	218641717	218647449	660.788	211.157	0.319553	-1.64587	231.859	2.34382e-52	1.01876e-51	2.12819e-48	1.6388e-48	1	-1	seq_var
GRMZM5G838907_T01	GRMZM5G838907	2	11307186	11308450	1632.65	361.135	0.221196	-2.1766	810.895	2.30873e-178	3.05587e-177	2.09633e-174	1.93818e-174	1	-1	seq_var	heat_on; salt_on
GRMZM5G839640_T01	GRMZM5G839640	5	5188197	5188793	705.536	9.65004	0.0136776	-6.19204	677.106	2.84594e-149	3.10964e-148	2.58411e-145	2.3479e-145	1	-1	seq_var
GRMZM5G843368_T01	GRMZM5G843368	3	146471009	146473900	2319.18	991.779	0.427642	-1.22552	532.17	9.52454e-118	8.44559e-117	8.64828e-114	7.67392e-114	1	-1	seq_var
GRMZM5G844096_T02	GRMZM5G844096	4	18463905	18480751	510.423	0.004033	7.90129e-06	-16.9495	510.411	5.16182e-113	4.35588e-112	4.68693e-109	4.13203e-109	1	-1	seq_var
GRMZM5G844309_T01	GRMZM5G844309	4	150919520	150920068	168.119	6.90205	0.0410546	-4.60631	148.501	3.68591e-34	1.21924e-33	3.34681e-30	2.33539e-30	1	-1	seq_var
GRMZM5G844316_T02	GRMZM5G844316	10	130914342	130915185	78.1087	0	0	-Inf	78.1087	9.7525e-19	2.38301e-18	8.85527e-15	5.23222e-15	1	-1	seq_var
GRMZM5G845130_T01	GRMZM5G845130	3	20581872	20582710	151.387	63.8496	0.421765	-1.24549	35.6016	2.42094e-09	4.41941e-09	2.19821e-05	9.9428e-06	1	-1	seq_var
GRMZM5G845736_T01	GRMZM5G845736	2	29350072	29354352	375.256	68.6924	0.183055	-2.44965	211.694	5.86542e-48	2.4066e-47	5.3258e-44	4.02837e-44	1	-1	seq_var
GRMZM5G846196_T02	GRMZM5G846196	6	123133603	123136760	591.073	277.172	0.46893	-1.09256	113.486	1.68834e-26	4.89781e-26	1.53302e-22	1.00473e-22	1	-1	seq_var
GRMZM5G848550_T01	GRMZM5G848550	10	120773059	120773646	874.472	228.673	0.261499	-1.93512	378.061	3.28968e-84	2.11247e-83	2.98703e-80	2.5222e-80	1	-1	seq_var	cold_up
GRMZM5G848768_T04	GRMZM5G848768	5	215868239	215872073	8811.32	3548.94	0.40277	-1.31197	2240.46	0	0	0	0	1	-1	seq_var
GRMZM5G852338_T02	GRMZM5G852338	8	138182296	138184613	660.101	290.081	0.439449	-1.18623	144.094	3.38941e-33	1.10268e-32	3.07759e-29	2.13194e-29	1	-1	seq_var
GRMZM5G854499_T01	GRMZM5G854499	6	88232209	88243549	1075.83	100.55	0.0934626	-3.41947	808.56	7.4308e-178	9.80693e-177	6.74717e-174	6.23667e-174	1	-1	seq_var
GRMZM5G855337_T01	GRMZM5G855337	6	165740749	165742725	491.687	180.837	0.367788	-1.44305	143.679	4.17508e-33	1.35683e-32	3.79097e-29	2.62487e-29	1	-1	seq_var	heat_down; uv_up
GRMZM5G855924_T01	GRMZM5G855924	4	173648501	173648980	180.095	59.3932	0.329788	-1.60039	60.8338	6.2104e-15	1.37203e-14	5.63904e-11	3.08719e-11	1	-1	seq_var
GRMZM5G856084_T01	GRMZM5G856084	10	82059765	82064097	4939.59	2116.52	0.428482	-1.22269	1129.48	1.29616e-247	2.54193e-246	1.17691e-243	1.11703e-243	1	-1	seq_var	heat_up
GRMZM5G856338_T03	GRMZM5G856338	6	107908153	107911251	932.656	310.08	0.33247	-1.5887	311.893	8.45104e-70	4.55403e-69	7.67354e-66	6.25039e-66	1	-1	seq_var
GRMZM5G857620_T01	GRMZM5G857620	4	908768	909813	394.056	55.5243	0.140905	-2.82721	254.913	2.20519e-57	1.0242e-56	2.00231e-53	1.57142e-53	1	-1	seq_var
GRMZM5G857641_T01	GRMZM5G857641	8	167330387	167334669	1694.57	445.732	0.263035	-1.92668	728.685	1.73079e-160	2.06512e-159	1.57156e-156	1.44002e-156	1	-1	seq_var
GRMZM5G860590_T02	GRMZM5G860590	8	78167123	78169212	266.65	20.9568	0.0785929	-3.66946	209.888	1.45328e-47	5.93868e-47	1.31958e-43	9.96802e-44	1	-1	seq_var
GRMZM5G860824_T01	GRMZM5G860824	9	155289643	155292907	460.763	148.379	0.322029	-1.63474	160.199	1.02395e-36	3.52176e-36	9.29744e-33	6.59524e-33	1	-1	seq_var
GRMZM5G862101_T03	GRMZM5G862101	9	5072079	5077777	724.832	297.461	0.410386	-1.28495	178.663	9.49177e-41	3.49636e-40	8.61853e-37	6.27976e-37	1	-1	seq_var	cold_down; salt_up; uv_down
GRMZM5G862331_T04	GRMZM5G862331	5	208794458	208800172	870.618	283.97	0.326171	-1.6163	298.077	8.64652e-67	4.48887e-66	7.85104e-63	6.3402e-63	1	-1	seq_var
GRMZM5G862488_T01	GRMZM5G862488	1	296642019	296656293	5807.19	2591.71	0.446294	-1.16393	1231.03	1.10259e-269	2.4478e-268	1.00115e-265	9.56166e-266	1	-1	seq_var
GRMZM5G862602_T01	GRMZM5G862602	7	121537526	121555417	728.871	119.403	0.16382	-2.60982	437.89	3.11689e-97	2.30467e-96	2.83014e-93	2.44769e-93	1	-1	seq_var	uv_on
GRMZM5G862817_T02	GRMZM5G862817	5	215314501	215316288	508.584	202.317	0.397804	-1.32987	131.945	1.5384e-30	4.79199e-30	1.39686e-26	9.48575e-27	1	-1	seq_var	heat_up; salt_up
GRMZM5G862959_T02	GRMZM5G862959	10	15210159	15247509	606.988	260.698	0.429494	-1.21929	138.203	6.57909e-32	2.09167e-31	5.97381e-28	4.09548e-28	1	-1	seq_var
GRMZM5G864239_T01	GRMZM5G864239	5	27663006	27663473	196.397	38.9023	0.19808	-2.33584	105.417	9.89662e-25	2.77125e-24	8.98613e-21	5.77864e-21	1	-1	seq_var
GRMZM5G864424_T01	GRMZM5G864424	6	71112242	71123103	639.533	142.953	0.223527	-2.16148	315.139	1.65878e-70	9.0244e-70	1.50617e-66	1.22949e-66	1	-1	seq_var
GRMZM5G867125_T01	GRMZM5G867125	7	136210750	136212956	1759.84	797.816	0.453345	-1.14132	361.853	1.11206e-80	6.79964e-80	1.00975e-76	8.44717e-77	1	-1	seq_var
GRMZM5G868062_T02	GRMZM5G868062	1	32530092	32532999	733.874	363.274	0.495008	-1.01448	125.183	4.64061e-29	1.40409e-28	4.21367e-25	2.82149e-25	1	-1	seq_var
GRMZM5G868120_T02	GRMZM5G868120	5	82174324	82179668	181.277	20.3744	0.112394	-3.15337	128.388	9.22912e-30	2.8311e-29	8.38004e-26	5.64915e-26	1	-1	seq_var
GRMZM5G868647_T01	GRMZM5G868647	10	23397025	23400344	233.782	103.763	0.443844	-1.17187	50.0821	1.47448e-12	3.01539e-12	1.33883e-08	6.84308e-09	1	-1	seq_var	cold_up; uv_up
GRMZM5G869246_T01	GRMZM5G869246	5	22576313	22578161	377.357	13.6563	0.0361894	-4.78829	338.296	1.49996e-75	8.66392e-75	1.36197e-71	1.12632e-71	1	-1	seq_var
GRMZM5G870077_T01	GRMZM5G870077	4	11719857	11721809	2656.92	239.91	0.0902963	-3.46919	2016.67	0	0	0	0	1	-1	seq_var
GRMZM5G871463_T02	GRMZM5G871463	4	79026612	79032492	969.956	155.021	0.159823	-2.64545	590.339	2.11436e-130	2.0533e-129	1.91984e-126	1.72236e-126	1	-1	seq_var
GRMZM5G872417_T01	GRMZM5G872417	6	162862269	162867072	699.648	150.573	0.215212	-2.21617	354.594	4.23338e-79	2.52889e-78	3.84391e-75	3.20086e-75	1	-1	seq_var
GRMZM5G872443_T01	GRMZM5G872443	4	12033401	12046891	218.081	30.9846	0.142079	-2.81524	140.545	2.0229e-32	6.50421e-32	1.83679e-28	1.26573e-28	1	-1	seq_var
GRMZM5G873681_T02	GRMZM5G873681	5	28214819	28216875	620.611	111.468	0.179611	-2.47706	354.096	5.43426e-79	3.24412e-78	4.93431e-75	4.1083e-75	1	-1	seq_var
GRMZM5G874270_T01	GRMZM5G874270	7	175336727	175337744	978.111	332.31	0.339747	-1.55747	318.263	3.46077e-71	1.90563e-70	3.14238e-67	2.57205e-67	1	-1	seq_var	cold_up
GRMZM5G876898_T02	GRMZM5G876898	2	8909755	8912742	9390.62	3374.44	0.359341	-1.47657	2835.43	0	0	0	0	1	-1	seq_var
GRMZM5G877388_T01	GRMZM5G877388	9	19041873	19045538	8422.22	2903.84	0.344783	-1.53624	2688.72	0	0	0	0	1	-1	seq_var
GRMZM5G877647_T01	GRMZM5G877647	4	5006417	5007575	212.777	99.5805	0.468004	-1.09541	41.0219	1.50534e-10	2.87033e-10	1.36685e-06	6.50157e-07	1	-1	seq_var
GRMZM5G878558_T01	GRMZM5G878558	5	210781199	210784644	558.825	237.49	0.424981	-1.23453	129.667	4.84578e-30	1.49152e-29	4.39997e-26	2.97095e-26	1	-1	seq_var
GRMZM5G878615_T04	GRMZM5G878615	8	162792237	162797447	552.597	206.284	0.3733	-1.42159	158.038	3.03551e-36	1.03618e-35	2.75625e-32	1.9491e-32	1	-1	seq_var
GRMZM5G883601_T01	GRMZM5G883601	1	65347101	65352900	1408.4	592.969	0.421023	-1.24803	332.237	3.1303e-74	1.78313e-73	2.84231e-70	2.34365e-70	1	-1	seq_var
GRMZM5G883632_T01	GRMZM5G883632	1	37136679	37138654	1005.49	385.513	0.383409	-1.38304	276.325	4.74656e-62	2.33471e-61	4.30988e-58	3.43414e-58	1	-1	seq_var
GRMZM5G886109_T01	GRMZM5G886109	8	116393113	116393881	427.233	176.008	0.411972	-1.27938	104.625	1.4759e-24	4.12216e-24	1.34012e-20	8.60449e-21	1	-1	seq_var
GRMZM5G889760_T01	GRMZM5G889760	3	122925601	122932676	753.065	201.799	0.26797	-1.89986	318.26	3.46715e-71	1.90798e-70	3.14817e-67	2.57644e-67	1	-1	seq_var
GRMZM5G890438_T01	GRMZM5G890438	9	85904467	85905184	1255.65	6.59239	0.00525018	-7.57342	1236.01	9.09903e-271	2.02996e-269	8.26192e-267	7.8925e-267	1	-1	seq_var
GRMZM5G890561_T01	GRMZM5G890561	2	177115729	177116705	194.874	67.434	0.346039	-1.53099	61.9155	3.58522e-15	7.95937e-15	3.25538e-11	1.78939e-11	1	-1	seq_var
GRMZM5G890843_T01	GRMZM5G890843	3	13397179	13400400	870.084	202.012	0.232175	-2.10671	416.306	1.55399e-92	1.09466e-91	1.41102e-88	1.21087e-88	1	-1	seq_var	cold_up
GRMZM5G893381_T02	GRMZM5G893381	8	17377248	17380167	794.194	282.9	0.35621	-1.4892	242.71	1.00881e-54	4.54814e-54	9.15995e-51	7.12923e-51	1	-1	seq_var
GRMZM5G894029_T01	GRMZM5G894029	2	55207704	55215071	405.135	95.5369	0.235815	-2.08427	191.445	1.5381e-43	5.92281e-43	1.3966e-39	1.03407e-39	1	-1	seq_var	salt_up
GRMZM5G894200_T01	GRMZM5G894200	1	221249071	221250115	220.199	100.917	0.458297	-1.12565	44.3092	2.80402e-11	5.49785e-11	2.54605e-07	1.24779e-07	1	-1	seq_var
GRMZM5G895554_T02	GRMZM5G895554	9	148216721	148223515	473.287	159.291	0.336562	-1.57105	155.861	9.08116e-36	3.08596e-35	8.24569e-32	5.82011e-32	1	-1	seq_var
GRMZM5G896294_T01	GRMZM5G896294	1	191891265	191892243	319.191	67.4016	0.211164	-2.24356	163.991	1.5195e-37	5.29232e-37	1.37971e-33	9.83726e-34	1	-1	seq_var	salt_up
GRMZM5G896536_T01	GRMZM5G896536	8	137098562	137100119	444.076	158.514	0.356951	-1.4862	135.326	2.80191e-31	8.82462e-31	2.54414e-27	1.73663e-27	1	-1	seq_var
GRMZM5G898684_T05	GRMZM5G898684	2	210251280	210274850	1763.98	845.87	0.479525	-1.06032	322.976	3.25563e-72	1.81468e-71	2.95611e-68	2.4261e-68	1	-1	seq_var
GRMZM5G899260_T01	GRMZM5G899260	1	78569608	78571470	884.186	188.312	0.212977	-2.23123	451.508	3.38822e-100	2.56375e-99	3.07651e-96	2.67026e-96	1	-1	seq_var	cold_up; heat_up; salt_up
GRMZM6G238741_T01	GRMZM6G238741	scaffold_345	1	3701	11260.1	2963.22	0.263162	-1.92598	4839.78	0	0	0	0	1	-1	seq_var
GRMZM6G279688_T01	GRMZM6G279688	scaffold_71	560	1267	167.609	74.3547	0.443619	-1.17261	35.9409	2.03392e-09	3.72565e-09	1.8468e-05	8.3879e-06	1	-1	seq_var
GRMZM6G312238_T01	GRMZM6G312238	scaffold_13	1	434	123.789	36.0067	0.290872	-1.78154	48.2223	3.80546e-12	7.68027e-12	3.45535e-08	1.74366e-08	1	-1	seq_var
GRMZM6G663759_T01	GRMZM6G663759	3	225692554	225693905	321.962	46.8317	0.145457	-2.78134	205.255	1.48966e-46	6.00362e-46	1.35261e-42	1.01714e-42	1	-1	seq_var
GRMZM6G684317_T01	GRMZM6G684317	5	34746022	34746974	332.818	69.1285	0.207707	-2.26738	172.988	1.64628e-39	5.95547e-39	1.49482e-35	1.08177e-35	1	-1	seq_var
GRMZM6G743306_T02	GRMZM6G743306	6	163700114	163701871	327.555	155.669	0.475246	-1.07325	61.1409	5.31318e-15	1.17639e-14	4.82437e-11	2.64597e-11	1	-1	seq_var
GRMZM6G768049_T01	GRMZM6G768049	3	175744246	175747343	408.781	70.4209	0.17227	-2.53725	238.913	6.78703e-54	3.01941e-53	6.16262e-50	4.77807e-50	1	-1	seq_var
GRMZM6G792203_T01	GRMZM6G792203	6	106633711	106634458	1115.15	492.381	0.44154	-1.17938	241.262	2.08732e-54	9.35021e-54	1.89529e-50	1.4724e-50	1	-1	seq_var
GRMZM6G815941_T01	GRMZM6G815941	2	14079216	14079636	524.215	236.419	0.450997	-1.14881	108.891	1.71442e-25	4.86772e-25	1.5567e-21	1.0086e-21	1	-1	seq_var
GRMZM6G816863_T01	GRMZM6G816863	scaffold_373	180	874	289.319	39.8899	0.137875	-2.85857	188.983	5.29955e-43	2.02952e-42	4.81199e-39	3.556e-39	1	-1	seq_var
AC155377.1_FGT001	AC155377.1_FG001	3	220967145	220986200	4477.03	10026.5	2.23955	1.16321	2123.41	0	0	0	0	1	1	seq_var
AC188023.3_FGT005	AC188023.3_FG005	6	165516914	165518066	360.9	890.872	2.46847	1.30362	224.378	1.00323e-50	4.26468e-50	9.10936e-47	6.96746e-47	1	1	seq_var
AC191360.3_FGT004	AC191360.3_FG004	4	238950156	238950641	4.6954	61.0338	12.9986	3.70029	48.2892	3.67764e-12	7.42726e-12	3.3393e-08	1.6862e-08	1	1	seq_var
AC191575.2_FGT001	AC191575.2_FG001	1	295351659	295380113	337.939	1791.04	5.2999	2.40596	991.794	1.09141e-217	1.83859e-216	9.91001e-214	9.32283e-214	1	1	seq_var
AC194112.3_FGT001	AC194112.3_FG001	8	65613367	65614416	3.06095	360.363	117.729	6.87933	351.284	2.22645e-78	1.32046e-77	2.02162e-74	1.68097e-74	1	1	seq_var
AC195340.3_FGT005	AC195340.3_FG005	5	5385991	5388061	1.73917	160.04	92.0209	6.52389	154.897	1.47475e-35	4.9984e-35	1.33907e-31	9.44134e-32	1	1	seq_var
AC197705.4_FGT011	AC197705.4_FG011	8	117605513	117618076	443.414	2754.68	6.21242	2.63516	1670.35	0	0	0	0	1	1	seq_var
AC198353.5_FGT001	AC198353.5_FG001	2	189442326	189444889	666.442	2199.25	3.29999	1.72246	819.871	2.5816e-180	3.4472e-179	2.34409e-176	2.1688e-176	1	1	seq_var
AC203173.3_FGT004	AC203173.3_FG004	8	174769780	174773141	859.698	2393.41	2.78402	1.47717	723.086	2.8545e-159	3.37925e-158	2.59189e-155	2.37323e-155	1	1	seq_var	cold_up
AC203535.4_FGT002	AC203535.4_FG002	3	157618651	157620063	196.697	415.879	2.11431	1.08019	78.4241	8.31336e-19	2.03684e-18	7.54853e-15	4.46843e-15	1	1	seq_var
AC203753.4_FGT006	AC203753.4_FG006	7	36536053	36545453	3.68525	658.782	178.762	7.4819	647.809	6.69391e-143	6.97827e-142	6.07807e-139	5.4957e-139	1	1	seq_var
AC204539.4_FGT002	AC204539.4_FG002	2	190204470	190205125	101.362	384.883	3.79712	1.92491	165.316	7.80146e-38	2.73609e-37	7.08373e-34	5.06471e-34	1	1	seq_var	salt_up
AC206259.3_FGT003	AC206259.3_FG003	1	292737076	292748808	0.664908	5367.86	8073.08	12.9789	5365.86	0	0	0	0	1	1	seq_var
AC208110.2_FGT006	AC208110.2_FG006	10	140161391	140166711	0.000299	2887.41	9.65688e+06	23.2031	2887.41	0	0	0	0	1	1	seq_var
AC208110.2_FGT007	AC208110.2_FG007	10	140166884	140168667	21.4727	141.513	6.59038	2.72036	88.4108	5.31783e-21	1.37293e-20	4.82859e-17	2.95884e-17	1	1	seq_var
AC208204.3_FGT006	AC208204.3_FG006	1	38641587	38642063	99.5151	218.072	2.19134	1.13182	44.2578	2.87852e-11	5.63782e-11	2.61369e-07	1.27959e-07	1	1	seq_var	heat_up; salt_up
AC208212.3_FGT001	AC208212.3_FG001	3	122798700	122799373	1.92169	38.189	19.8726	4.31271	32.7922	1.02555e-08	1.82623e-08	9.31197e-05	4.08373e-05	1	1	seq_var	cold_on; salt_on
AC209835.4_FGT004	AC209835.4_FG004	5	21903403	21908619	19.1182	702.41	36.7405	5.1993	647.082	9.63195e-143	1.00181e-141	8.74581e-139	7.9059e-139	1	1	seq_var
AC210013.4_FGT006	AC210013.4_FG006	5	3327323	3329886	70.4155	521.366	7.40414	2.88833	343.634	1.03135e-76	6.01067e-76	9.36462e-73	7.75882e-73	1	1	seq_var
AC210013.4_FGT011	AC210013.4_FG011	5	3393733	3397474	787.597	1630.46	2.07017	1.04975	293.796	7.40467e-66	3.79427e-65	6.72344e-62	5.41208e-62	1	1	seq_var
AC210013.4_FGT016	AC210013.4_FG016	5	3422925	3423865	35.9295	407.471	11.3408	3.50345	311.328	1.12177e-69	6.01992e-69	1.01857e-65	8.28878e-66	1	1	seq_var
AC212023.4_FGT004	AC212023.4_FG004	1	224834374	224835033	1603.1	3817.97	2.38161	1.25194	904.92	8.36242e-199	1.25713e-197	7.59308e-195	7.08883e-195	1	1	seq_var
AC213463.3_FGT007	AC213463.3_FG007	5	13059430	13062622	155.929	404.129	2.59175	1.37392	109.994	9.82772e-26	2.80615e-25	8.92357e-22	5.79934e-22	1	1	seq_var
AC214640.3_FGT003	AC214640.3_FG003	7	145489406	145497887	264	722.107	2.73525	1.45167	212.819	3.33374e-48	1.37343e-47	3.02703e-44	2.29261e-44	1	1	seq_var
AC215201.3_FGT005	AC215201.3_FG005	6	142273603	142277674	386.467	1057.3	2.73581	1.45197	311.695	9.3305e-70	5.01901e-69	8.47209e-66	6.89804e-66	1	1	seq_var
AC215260.3_FGT001	AC215260.3_FG001	3	17124394	17124921	52.8802	273.364	5.16949	2.37002	149.008	2.85633e-34	9.45859e-34	2.59355e-30	1.81063e-30	1	1	seq_var
AC215309.3_FGT004	AC215309.3_FG004	1	203374158	203378011	87.198	378.339	4.33885	2.11731	182.076	1.70665e-41	6.36664e-41	1.54964e-37	1.13441e-37	1	1	seq_var
AC225147.4_FGT002	AC225147.4_FG002	1	292956665	292959161	5.22149	511.446	97.9501	6.61397	495.992	7.07969e-110	5.83335e-109	6.42836e-106	5.64888e-106	1	1	seq_var
AC233939.1_FGT004	AC233939.1_FG004	9	139199334	139199763	74.6388	320.348	4.29198	2.10164	152.848	4.13495e-35	1.38902e-34	3.75453e-31	2.63727e-31	1	1	seq_var
AC233953.1_FGT005	AC233953.1_FG005	8	159041068	159045552	1610.1	3812.59	2.36792	1.24362	894.569	1.48749e-196	2.19617e-195	1.35064e-192	1.25931e-192	1	1	seq_var
AC234203.1_FGT009	AC234203.1_FG009	1	188093915	188095642	32.4147	289.956	8.94522	3.16112	205.75	1.16198e-46	4.68714e-46	1.05508e-42	7.93631e-43	1	1	seq_var	heat_up; salt_up
GRMZM2G000397_T01	GRMZM2G000397	2	12136408	12137757	123.564	1469.4	11.8918	3.5719	1137.05	2.92874e-249	5.81903e-248	2.6593e-245	2.52575e-245	1	1	seq_var
GRMZM2G000812_T01	GRMZM2G000812	5	126853038	126855915	302.274	681.464	2.25446	1.17278	146.162	1.19624e-33	3.92267e-33	1.08619e-29	7.55067e-30	1	1	seq_var
GRMZM2G001905_T01	GRMZM2G001905	10	148308249	148312010	452.137	1237.94	2.73797	1.4531	365.357	1.91909e-81	1.19188e-80	1.74253e-77	1.46215e-77	1	1	seq_var
GRMZM2G002075_T01	GRMZM2G002075	2	186805631	186808459	330.8	715.561	2.16312	1.11311	141.482	1.26243e-32	4.07063e-32	1.14629e-28	7.90915e-29	1	1	seq_var
GRMZM2G002656_T01	GRMZM2G002656	6	129006368	129016640	82.1427	9608.39	116.972	6.87002	9364.74	0	0	0	0	1	1	seq_var
GRMZM2G003252_T01	GRMZM2G003252	2	217997898	218001975	224.926	537.281	2.38871	1.25623	128.005	1.1197e-29	3.43129e-29	1.01669e-25	6.85035e-26	1	1	seq_var
GRMZM2G003424_T02	GRMZM2G003424	1	54122528	54126069	24.5752	194.29	7.90594	2.98294	131.602	1.82823e-30	5.68308e-30	1.66003e-26	1.12619e-26	1	1	seq_var
GRMZM2G003715_T02	GRMZM2G003715	10	78142632	78146839	17.0806	243.3	14.2442	3.8323	196.54	1.1885e-44	4.66361e-44	1.07916e-40	8.04258e-41	1	1	seq_var	cold_on; uv_on
GRMZM2G003720_T02	GRMZM2G003720	2	49627184	49630358	119.685	440.43	3.67991	1.87967	183.672	7.6515e-42	2.87208e-41	6.94756e-38	5.09743e-38	1	1	seq_var
GRMZM2G003875_T01	GRMZM2G003875	8	62070100	62074227	113.842	465.682	4.09061	2.03231	213.609	2.24132e-48	9.24636e-48	2.03512e-44	1.54203e-44	1	1	seq_var
GRMZM2G003897_T01	GRMZM2G003897	10	83460738	83468025	111.673	273.638	2.45034	1.29298	68.0815	1.56879e-16	3.61631e-16	1.42446e-12	8.06673e-13	1	1	seq_var
GRMZM2G003992_T01	GRMZM2G003992	2	189923247	189926359	372.495	746.394	2.00377	1.00272	124.946	5.22952e-29	1.58122e-28	4.7484e-25	3.1785e-25	1	1	seq_var
GRMZM2G004435_T04	GRMZM2G004435	6	1239927	1243099	175.595	450.534	2.56575	1.35938	120.728	4.3832e-28	1.30276e-27	3.97994e-24	2.64132e-24	1	1	seq_var
GRMZM2G004466_T01	GRMZM2G004466	9	149512378	149513673	42.5618	433.301	10.1805	3.34774	320.843	9.49164e-72	5.24873e-71	8.61841e-68	7.06083e-68	1	1	seq_var
GRMZM2G004795_T01	GRMZM2G004795	6	160209415	160211804	145.99	323.884	2.21853	1.14961	67.3504	2.27301e-16	5.21448e-16	2.06389e-12	1.16446e-12	1	1	seq_var
GRMZM2G005195_T01	GRMZM2G005195	6	120684714	120691281	825.578	2144.23	2.59725	1.37698	585.507	2.37786e-129	2.29447e-128	2.1591e-125	1.93558e-125	1	1	seq_var
GRMZM2G005339_T01	GRMZM2G005339	9	19297443	19299333	88.1193	624.915	7.0917	2.82613	404.118	6.99126e-90	4.78377e-89	6.34807e-86	5.42102e-86	1	1	seq_var
GRMZM2G006121_T01	GRMZM2G006121	8	149983816	149986151	781.562	1879.3	2.40454	1.26576	452.87	1.7123e-100	1.29997e-99	1.55477e-96	1.35015e-96	1	1	seq_var
GRMZM2G006130_T05	GRMZM2G006130	3	230094705	230104670	1594.59	3538.26	2.21891	1.14985	736.01	4.41987e-162	5.34387e-161	4.01325e-158	3.68175e-158	1	1	seq_var
GRMZM2G007157_T01	GRMZM2G007157	2	10001775	10005749	96.644	1177.75	12.1865	3.60721	917.135	1.84909e-201	2.82181e-200	1.67898e-197	1.56914e-197	1	1	seq_var
GRMZM2G007453_T04	GRMZM2G007453	2	9988448	9994999	598.058	1394.55	2.33179	1.22144	318.375	3.27188e-71	1.80271e-70	2.97087e-67	2.43199e-67	1	1	seq_var
GRMZM2G008611_T02	GRMZM2G008611	10	146184325	146238075	9.73398	306.618	31.4997	4.97727	278.614	1.50543e-62	7.4492e-62	1.36693e-58	1.09083e-58	1	1	seq_var
GRMZM2G008623_T02	GRMZM2G008623	2	214508389	214514872	343.981	931.939	2.70927	1.43791	270.937	7.0892e-61	3.43673e-60	6.437e-57	5.1099e-57	1	1	seq_var
GRMZM2G008859_T01	GRMZM2G008859	4	235108568	235111857	25.4261	449.603	17.6827	4.14427	378.769	2.30716e-84	1.48469e-83	2.0949e-80	1.76959e-80	1	1	seq_var
GRMZM2G009125_T01	GRMZM2G009125	2	44336664	44339115	39.1424	100.872	2.57706	1.36573	27.2155	1.81993e-07	3.06586e-07	0.0016525	0.000671737	1	1	seq_var	salt_on
GRMZM2G009624_T02	GRMZM2G009624	1	123781645	123784934	18.3225	130.407	7.11735	2.83134	84.4689	3.90311e-20	9.8582e-20	3.54402e-16	2.14125e-16	1	1	seq_var
GRMZM2G009626_T02	GRMZM2G009626	2	158264225	158273549	206.651	475.589	2.30141	1.20252	106.015	7.31752e-25	2.05579e-24	6.64431e-21	4.28002e-21	1	1	seq_var
GRMZM2G009655_T01	GRMZM2G009655	1	123760528	123780037	0.471675	4009.37	8500.27	13.0533	4007.95	0	0	0	0	1	1	seq_var
GRMZM2G009928_T01	GRMZM2G009928	5	3953086	3956621	142.868	597.329	4.18099	2.06385	279.027	1.22334e-62	6.06659e-62	1.11079e-58	8.86921e-59	1	1	seq_var
GRMZM2G009940_T02	GRMZM2G009940	7	54644665	54650997	503.081	2489.99	4.94948	2.30728	1318.98	8.47068e-289	2.04558e-287	7.69138e-285	7.37373e-285	1	1	seq_var
GRMZM2G010075_T01	GRMZM2G010075	5	142518690	142524589	476.428	1325.35	2.78185	1.47604	399.976	5.57442e-89	3.7886e-88	5.06157e-85	4.31739e-85	1	1	seq_var
GRMZM2G010085_T01	GRMZM2G010085	3	68366065	68372195	543.3	1221.21	2.24776	1.16849	260.446	1.37158e-58	6.4662e-58	1.24539e-54	9.81363e-55	1	1	seq_var
GRMZM2G010468_T01	GRMZM2G010468	8	169997346	169999737	78.8499	755.355	9.57965	3.25997	548.617	2.51723e-121	2.29944e-120	2.28564e-117	2.03568e-117	1	1	seq_var	heat_up; salt_up; uv_up
GRMZM2G010768_T01	GRMZM2G010768	9	23074207	23075360	1260.09	3595.57	2.85342	1.51269	1123.32	2.82317e-246	5.46574e-245	2.56343e-242	2.43131e-242	1	1	seq_var	cold_off; salt_up; uv_off
GRMZM2G010783_T01	GRMZM2G010783	2	217276427	217278951	46.8766	939.403	20.0399	4.3248	807.685	1.15141e-177	1.51739e-176	1.04548e-173	9.66267e-174	1	1	seq_var	salt_up; uv_down
GRMZM2G010831_T01	GRMZM2G010831	1	246455166	246458746	26.4484	936.266	35.3997	5.14567	859.827	5.30981e-189	7.49814e-188	4.8213e-185	4.48042e-185	1	1	seq_var
GRMZM2G010987_T01	GRMZM2G010987	8	152285574	152287645	711.041	1463.72	2.05856	1.04164	260.502	1.33385e-58	6.29164e-58	1.21114e-54	9.54507e-55	1	1	seq_var	cold_up; salt_up
GRMZM2G011071_T01	GRMZM2G011071	9	138960872	138963753	104.367	264.479	2.53413	1.34149	69.5031	7.62961e-17	1.77496e-16	6.92769e-13	3.95061e-13	1	1	seq_var
GRMZM2G011662_T04	GRMZM2G011662	6	165549784	165553311	350.874	825.174	2.35177	1.23375	191.285	1.66663e-43	6.41229e-43	1.5133e-39	1.12014e-39	1	1	seq_var
GRMZM2G012030_T02	GRMZM2G012030	5	33309792	33318435	550.884	4521.08	8.20696	3.03685	3107.76	0	0	0	0	1	1	seq_var
GRMZM2G012183_T01	GRMZM2G012183	7	163635938	163637454	208.163	426.887	2.05074	1.03614	75.3335	3.97558e-18	9.55486e-18	3.60983e-14	2.10825e-14	1	1	seq_var
GRMZM2G012690_T01	GRMZM2G012690	5	163247794	163267252	338.857	875.862	2.58476	1.37003	237.401	1.45047e-53	6.43082e-53	1.31703e-49	1.02012e-49	1	1	seq_var
GRMZM2G012932_T01	GRMZM2G012932	1	166686842	166689588	0.67	2511.14	3747.97	11.8719	2509.13	0	0	0	0	1	1	seq_var
GRMZM2G013391_T01	GRMZM2G013391	8	173930578	173932078	159.381	391.065	2.45366	1.29493	97.5168	5.34009e-23	1.44095e-22	4.8488e-19	3.0524e-19	1	1	seq_var
GRMZM2G013457_T01	GRMZM2G013457	1	22937609	22939512	1e-06	684.843	684843007	29.3512	684.843	5.91213e-151	6.56261e-150	5.36821e-147	4.88519e-147	1	1	seq_var
GRMZM2G014116_T01	GRMZM2G014116	5	216585750	216591547	1235.05	3691.87	2.98925	1.57978	1225.1	2.13898e-268	4.71405e-267	1.94219e-264	1.85428e-264	1	1	seq_var
GRMZM2G015364_T01	GRMZM2G015364	3	226260910	226263866	78.845	455.419	5.77613	2.5301	265.427	1.12636e-59	5.37716e-59	1.02274e-55	8.08615e-56	1	1	seq_var	heat_on; salt_on
GRMZM2G015592_T01	GRMZM2G015592	3	229745570	229752477	41.6422	481.347	11.5591	3.53096	369.683	2.19389e-82	1.37954e-81	1.99205e-78	1.67547e-78	1	1	seq_var
GRMZM2G015908_T01	GRMZM2G015908	3	202254409	202255643	158.49	848.117	5.35123	2.41987	472.464	9.32576e-105	7.3697e-104	8.46779e-101	7.39719e-101	1	1	seq_var	heat_up; salt_up; uv_off
GRMZM2G016605_T03	GRMZM2G016605	8	106153813	106156418	289.02	676.328	2.34007	1.22655	155.392	1.14949e-35	3.90036e-35	1.04374e-31	7.36247e-32	1	1	seq_var
GRMZM2G016827_T02	GRMZM2G016827	8	157506230	157512832	1176.07	2562.57	2.17893	1.12362	514.193	7.76077e-114	6.59193e-113	7.04678e-110	6.21793e-110	1	1	seq_var
GRMZM2G017164_T01	GRMZM2G017164	10	100242426	100245138	27.6673	145.296	5.25155	2.39274	79.997	3.74978e-19	9.2346e-19	3.4048e-15	2.02263e-15	1	1	seq_var
GRMZM2G017429_T01	GRMZM2G017429	5	207948915	207950416	322.379	1194.79	3.70616	1.88992	501.656	4.14706e-111	3.45145e-110	3.76553e-107	3.3135e-107	1	1	seq_var
GRMZM2G017460_T01	GRMZM2G017460	9	129107776	129110463	683.619	1833.33	2.68181	1.42321	525.177	3.16409e-116	2.75191e-115	2.87299e-112	2.54298e-112	1	1	seq_var
GRMZM2G017666_T01	GRMZM2G017666	8	53335931	53337929	183.92	592.626	3.22218	1.68804	215.106	1.05659e-48	4.37276e-48	9.59383e-45	7.27673e-45	1	1	seq_var
GRMZM2G017961_T01	GRMZM2G017961	2	196395892	196405869	643.367	1881.61	2.92462	1.54825	607.228	4.48317e-134	4.40078e-133	4.07072e-130	3.65647e-130	1	1	seq_var
GRMZM2G018142_T01	GRMZM2G018142	8	77760712	77775495	1e-06	1780.83	1780825838	30.7299	1780.83	0	0	0	0	1	1	seq_var
GRMZM2G018631_T01	GRMZM2G018631	10	134591174	134592109	165.706	541.04	3.26505	1.70711	199.329	2.92517e-45	1.16239e-44	2.65606e-41	1.98795e-41	1	1	seq_var
GRMZM2G018678_T01	GRMZM2G018678	1	52795361	52804613	28.6787	405.337	14.1337	3.82107	326.881	4.59279e-73	2.5822e-72	4.17026e-69	3.42898e-69	1	1	seq_var	cold_on
GRMZM2G018813_T01	GRMZM2G018813	2	167191019	167192305	27.8898	286.703	10.2799	3.36175	212.924	3.16189e-48	1.30322e-47	2.871e-44	2.17475e-44	1	1	seq_var
GRMZM2G019177_T01	GRMZM2G019177	4	169036645	169041098	69.6742	3104.3	44.5545	5.4775	2901.4	0	0	0	0	1	1	seq_var	salt_up
GRMZM2G019200_T01	GRMZM2G019200	7	1949666	1957643	395.315	1093.71	2.76667	1.46815	327.564	3.26087e-73	1.83905e-72	2.96087e-69	2.4362e-69	1	1	seq_var
GRMZM2G019468_T01	GRMZM2G019468	2	46972478	46973873	595.165	1403.93	2.3589	1.23811	327.201	3.91237e-73	2.20374e-72	3.55243e-69	2.92215e-69	1	1	seq_var
GRMZM2G019619_T01	GRMZM2G019619	8	98670076	98673711	352.559	794.242	2.25279	1.17172	170.112	6.99449e-39	2.50335e-38	6.351e-35	4.57719e-35	1	1	seq_var	cold_up; heat_off; salt_off
GRMZM2G020775_T01	GRMZM2G020775	4	162708520	162718567	1612.73	3341.77	2.07212	1.05111	603.405	3.04203e-133	2.97968e-132	2.76216e-129	2.48047e-129	1	1	seq_var
GRMZM2G021436_T01	GRMZM2G021436	8	145218834	145221192	11.2759	333.856	29.6078	4.88791	301.502	1.55094e-67	8.13077e-67	1.40825e-63	1.13978e-63	1	1	seq_var
GRMZM2G022181_T01	GRMZM2G022181	5	87072679	87074546	127.347	330.62	2.59621	1.37641	90.2246	2.12601e-21	5.54557e-21	1.93041e-17	1.19056e-17	1	1	seq_var
GRMZM2G022402_T01	GRMZM2G022402	8	140636554	140638484	19.8806	344.27	17.3169	4.11411	288.97	8.33583e-65	4.23792e-64	7.56893e-61	6.08098e-61	1	1	seq_var
GRMZM2G022782_T01	GRMZM2G022782	8	39928379	39932619	149.312	1496.16	10.0204	3.32487	1102.42	9.83641e-242	1.87242e-240	8.93146e-238	8.46325e-238	1	1	seq_var	uv_on
GRMZM2G023667_T01	GRMZM2G023667	8	153685211	153694518	238.208	727.721	3.05498	1.61117	248.076	6.8234e-56	3.11652e-55	6.19565e-52	4.83984e-52	1	1	seq_var
GRMZM2G023711_T01	GRMZM2G023711	5	211399849	211401682	143.786	341.017	2.3717	1.24592	80.2389	3.31779e-19	8.18851e-19	3.01255e-15	1.79227e-15	1	1	seq_var	cold_on
GRMZM2G024151_T02	GRMZM2G024151	8	5915270	5919173	1007.17	4050.99	4.02214	2.00796	1831.66	0	0	0	0	1	1	seq_var
GRMZM2G024550_T01	GRMZM2G024550	5	181938089	181940862	201.823	797.036	3.94919	1.98156	354.684	4.0477e-79	2.41956e-78	3.67531e-75	3.06087e-75	1	1	seq_var	cold_down; salt_up; uv_down
GRMZM2G024697_T04	GRMZM2G024697	5	175745724	175750143	4.51029	90.7962	20.1309	4.33134	78.1191	9.70121e-19	2.37112e-18	8.8087e-15	5.20567e-15	1	1	seq_var
GRMZM2G024992_T01	GRMZM2G024992	3	186899469	186904965	574.033	1228	2.13924	1.0971	237.326	1.50586e-53	6.67313e-53	1.36732e-49	1.05892e-49	1	1	seq_var
GRMZM2G025459_T01	GRMZM2G025459	8	119744949	119748072	2001.43	4129.94	2.06349	1.04509	738.908	1.03548e-162	1.25866e-161	9.40218e-159	8.62971e-159	1	1	seq_var
GRMZM2G025966_T01	GRMZM2G025966	8	155657748	155662716	790.925	3076.12	3.88927	1.9595	1350.41	1.25265e-295	3.10767e-294	1.13741e-291	1.09168e-291	1	1	seq_var
GRMZM2G026800_T01	GRMZM2G026800	5	23275338	23279515	289.546	742.624	2.56479	1.35884	198.882	3.66197e-45	1.4539e-44	3.32507e-41	2.48794e-41	1	1	seq_var
GRMZM2G027209_T02	GRMZM2G027209	4	239289147	239300824	298.832	739.833	2.47575	1.30787	187.243	1.2711e-42	4.83115e-42	1.15416e-38	8.50622e-39	1	1	seq_var
GRMZM2G027331_T06	GRMZM2G027331	1	178347827	178352009	283.172	833.699	2.94414	1.55785	271.365	5.71947e-61	2.77567e-60	5.19328e-57	4.12374e-57	1	1	seq_var
GRMZM2G027378_T01	GRMZM2G027378	4	221041836	221045285	3423.88	7310.45	2.13514	1.09433	1407.21	0	1.48209e-306	5.1725e-304	4.97426e-304	1	1	seq_var
GRMZM2G027499_T01	GRMZM2G027499	9	131772657	131775695	384.019	843.94	2.19765	1.13596	172.259	2.37537e-39	8.56906e-39	2.15683e-35	1.55919e-35	1	1	seq_var
GRMZM2G027932_T01	GRMZM2G027932	8	160464200	160471207	460.288	2323.5	5.04794	2.3357	1247.07	3.60023e-273	8.13186e-272	3.26901e-269	3.12464e-269	1	1	seq_var
GRMZM2G028005_T01	GRMZM2G028005	4	233791589	233799168	235.008	816.079	3.47256	1.796	321.233	7.80367e-72	4.32057e-71	7.08574e-68	5.80671e-68	1	1	seq_var
GRMZM2G028535_T01	GRMZM2G028535	8	167716847	167725004	341.068	3260.45	9.55954	3.25694	2366.45	0	0	0	0	1	1	seq_var	salt_on
GRMZM2G028709_T03	GRMZM2G028709	4	195901200	195906771	386.467	1384.4	3.5822	1.84085	562.366	2.57048e-124	2.40123e-123	2.334e-120	2.0844e-120	1	1	seq_var
GRMZM2G028905_T01	GRMZM2G028905	2	209097797	209101289	44.9588	809.607	18.0078	4.17055	684.192	8.19141e-151	9.07049e-150	7.4378e-147	6.76692e-147	1	1	seq_var
GRMZM2G029038_T01	GRMZM2G029038	9	134485066	134487234	93.8682	514.053	5.47633	2.45321	290.425	4.01737e-65	2.04586e-64	3.64777e-61	2.93187e-61	1	1	seq_var
GRMZM2G030097_T01	GRMZM2G030097	9	138804248	138809436	507.178	2173.02	4.28453	2.09914	1035.38	3.66366e-227	6.53556e-226	3.3266e-223	3.14049e-223	1	1	seq_var	salt_up; uv_off
GRMZM2G031107_T01	GRMZM2G031107	5	181440754	181446379	865.27	1881.85	2.17487	1.12093	376.19	8.40293e-84	5.38072e-83	7.62986e-80	6.43917e-80	1	1	seq_var
GRMZM2G031607_T01	GRMZM2G031607	8	173389691	173391995	30.5833	191.864	6.27351	2.64927	116.934	2.96837e-27	8.70567e-27	2.69528e-23	1.77657e-23	1	1	seq_var	heat_up; salt_up
GRMZM2G031938_T01	GRMZM2G031938	1	245541513	245551055	3.50794	1703.06	485.487	8.92329	1692.57	0	0	0	0	1	1	seq_var	heat_up; salt_up
GRMZM2G032218_T01	GRMZM2G032218	2	13863654	13872014	7138.87	14286.2	2.00119	1.00085	2384.33	0	0	0	0	1	1	seq_var
GRMZM2G032222_T01	GRMZM2G032222	1	223745977	223752961	248.278	1220.58	4.91618	2.29754	643.61	5.47983e-142	5.67353e-141	4.97569e-138	4.49565e-138	1	1	seq_var
GRMZM2G032266_T01	GRMZM2G032266	7	6581600	6583265	531.315	2509.9	4.72393	2.23999	1287.25	6.67975e-282	1.55918e-280	6.06521e-278	5.80604e-278	1	1	seq_var
GRMZM2G032282_T01	GRMZM2G032282	10	141340391	141349914	221.729	2671.79	12.0498	3.59094	2074.56	0	0	0	0	1	1	seq_var
GRMZM2G032721_T02	GRMZM2G032721	2	42397050	42398701	22.7225	910.663	40.0776	5.32472	844.708	1.02832e-185	1.4277e-184	9.33716e-182	8.66567e-182	1	1	seq_var
GRMZM2G032821_T01	GRMZM2G032821	1	75404187	75433185	1699	3689.54	2.1716	1.11876	735.311	6.26979e-162	7.57044e-161	5.69297e-158	5.22211e-158	1	1	seq_var
GRMZM2G033926_T03	GRMZM2G033926	5	24730472	24733807	615.788	1491.66	2.42236	1.27641	364.019	3.75415e-81	2.31574e-80	3.40877e-77	2.85653e-77	1	1	seq_var
GRMZM2G034052_T01	GRMZM2G034052	8	70066035	70069360	80.7767	724.195	8.96539	3.16437	514.288	7.40219e-114	6.29325e-113	6.72119e-110	5.93137e-110	1	1	seq_var
GRMZM2G034152_T01	GRMZM2G034152	10	62260920	62265303	1036.94	4563.77	4.4012	2.1379	2220.89	0	0	0	0	1	1	seq_var
GRMZM2G034157_T01	GRMZM2G034157	8	21620266	21621116	13.2041	78.6006	5.95276	2.57356	46.5848	8.77371e-12	1.7482e-11	7.96653e-08	3.96923e-08	1	1	seq_var	cold_up; heat_up; salt_up; uv_up
GRMZM2G034495_T01	GRMZM2G034495	8	100928654	100930976	4.30655	350.578	81.4058	6.34706	337.868	1.85904e-75	1.07175e-74	1.68801e-71	1.39539e-71	1	1	seq_var
GRMZM2G035584_T01	GRMZM2G035584	5	183658122	183663110	445.422	1097.59	2.46415	1.30109	275.642	6.68659e-62	3.27831e-61	6.07142e-58	4.83374e-58	1	1	seq_var	cold_up
GRMZM2G035985_T01	GRMZM2G035985	2	215498779	215518573	329.983	2422.76	7.34208	2.87619	1591.04	0	0	0	0	1	1	seq_var
GRMZM2G035999_T02	GRMZM2G035999	7	135441629	135503102	523.207	1074.19	2.05308	1.03779	190.047	3.10516e-43	1.19268e-42	2.81949e-39	2.08574e-39	1	1	seq_var
GRMZM2G036427_T01	GRMZM2G036427	10	23221425	23223906	650.56	1572.4	2.417	1.27322	382.281	3.9662e-85	2.57604e-84	3.60131e-81	3.04723e-81	1	1	seq_var	salt_up; uv_down
GRMZM2G036631_T01	GRMZM2G036631	8	169670971	169672584	1.02306	80.2333	78.4245	6.29323	77.2156	1.53277e-18	3.72825e-18	1.39176e-14	8.19727e-15	1	1	seq_var
GRMZM2G036640_T01	GRMZM2G036640	1	264587456	264589878	114.263	439.443	3.84588	1.94331	190.971	1.95171e-43	7.50594e-43	1.77215e-39	1.31155e-39	1	1	seq_var
GRMZM2G037130_T01	GRMZM2G037130	3	18192065	18193118	337.177	705.158	2.09136	1.06444	129.911	4.28609e-30	1.32193e-29	3.89177e-26	2.63037e-26	1	1	seq_var
GRMZM2G037200_T01	GRMZM2G037200	5	196068947	196075524	20.9279	1281.36	61.2275	5.93611	1219.92	2.85284e-267	6.24188e-266	2.59038e-263	2.47227e-263	1	1	seq_var
GRMZM2G037614_T01	GRMZM2G037614	2	234416552	234420710	932.96	2990.32	3.2052	1.68041	1078.88	1.28713e-236	2.38512e-235	1.16871e-232	1.10577e-232	1	1	seq_var
GRMZM2G037778_T02	GRMZM2G037778	6	14026238	14027938	28.5822	6146.56	215.049	7.74852	6061.34	0	0	0	0	1	1	seq_var
GRMZM2G037875_T01	GRMZM2G037875	2	199166132	199169546	271.663	545.169	2.00678	1.00488	91.5799	1.07175e-21	2.81258e-21	9.73153e-18	6.02433e-18	1	1	seq_var	cold_up
GRMZM2G038281_T01	GRMZM2G038281	3	173058397	173066203	9.63735	141.572	14.6899	3.87676	115.117	7.41892e-27	2.15841e-26	6.73638e-23	4.42168e-23	1	1	seq_var
GRMZM2G038365_T01	GRMZM2G038365	4	226804999	226807042	20777.8	47713.3	2.29637	1.19935	10593	0	0	0	0	1	1	seq_var
GRMZM2G038384_T01	GRMZM2G038384	10	146883534	146887072	167.673	381.179	2.27334	1.18481	83.0544	7.98266e-20	2.00173e-19	7.24825e-16	4.35853e-16	1	1	seq_var
GRMZM2G038791_T01	GRMZM2G038791	5	74072447	74080094	280.305	1582.31	5.64497	2.49697	910.13	6.16224e-200	9.31e-199	5.59531e-196	5.22558e-196	1	1	seq_var
GRMZM2G038801_T02	GRMZM2G038801	5	15478937	15481612	149.133	485.143	3.25309	1.70181	178.003	1.32301e-40	4.86352e-40	1.20129e-36	8.7464e-37	1	1	seq_var
GRMZM2G038898_T03	GRMZM2G038898	1	238522629	238525355	68.4827	2245.1	32.7835	5.0349	2047.76	0	0	0	0	1	1	seq_var	cold_down; salt_up
GRMZM2G039094_T01	GRMZM2G039094	1	167346349	167352916	174.383	360.549	2.06758	1.04794	64.7896	8.33384e-16	1.88547e-15	7.56713e-12	4.22359e-12	1	1	seq_var
GRMZM2G039396_T01	GRMZM2G039396	8	876212	882478	1499.56	4700.55	3.13462	1.64829	1652.61	0	0	0	0	1	1	seq_var
GRMZM2G039993_T01	GRMZM2G039993	9	1995840	1997888	220.06	528.151	2.40003	1.26305	126.862	1.99112e-29	6.07504e-29	1.80793e-25	1.21558e-25	1	1	seq_var	cold_down; salt_off; uv_up
GRMZM2G040182_T01	GRMZM2G040182	5	36080250	36092566	342.943	1053.97	3.07329	1.61978	361.908	1.0819e-80	6.61972e-80	9.82366e-77	8.2192e-77	1	1	seq_var
GRMZM2G040452_T03	GRMZM2G040452	4	230075113	230077905	787.137	1755.69	2.23048	1.15735	368.92	3.2163e-82	2.01685e-81	2.9204e-78	2.455e-78	1	1	seq_var
GRMZM2G040515_T01	GRMZM2G040515	1	63614860	63617873	508.072	1111.33	2.18734	1.12918	224.724	8.43551e-51	3.59261e-50	7.65944e-47	5.86183e-47	1	1	seq_var
GRMZM2G040587_T01	GRMZM2G040587	3	15237353	15242747	121.325	272.862	2.24902	1.1693	58.2556	2.30179e-14	4.99051e-14	2.09003e-10	1.12627e-10	1	1	seq_var	salt_on
GRMZM2G040692_T01	GRMZM2G040692	2	180465569	180466896	243.367	914.522	3.75778	1.90988	389.026	1.34904e-86	8.89561e-86	1.22493e-82	1.0393e-82	1	1	seq_var
GRMZM2G040878_T01	GRMZM2G040878	2	11373420	11375404	4327.09	10231.6	2.36456	1.24157	2394.7	0	0	0	0	1	1	seq_var
GRMZM2G041068_T01	GRMZM2G041068	9	101691037	101692320	97.3041	1008.18	10.3611	3.37311	750.525	3.08459e-165	3.78488e-164	2.80081e-161	2.57286e-161	1	1	seq_var
GRMZM2G041127_T01	GRMZM2G041127	2	188712314	188714917	441.844	1737.04	3.93135	1.97502	769.906	1.88435e-169	2.37967e-168	1.71099e-165	1.57569e-165	1	1	seq_var	cold_up; heat_down; salt_down
GRMZM2G042080_T02	GRMZM2G042080	9	25828876	25831552	268.579	745.431	2.77547	1.47273	224.246	1.07195e-50	4.55465e-50	9.73328e-47	7.4436e-47	1	1	seq_var
GRMZM2G042250_T02	GRMZM2G042250	1	2791821	2798509	535.286	1114.57	2.0822	1.05811	203.394	3.79452e-46	1.52385e-45	3.44542e-42	2.58786e-42	1	1	seq_var
GRMZM2G042552_T01	GRMZM2G042552	1	2781765	2783974	132.696	376.155	2.83472	1.50321	116.483	3.72571e-27	1.08987e-26	3.38294e-23	2.22686e-23	1	1	seq_var
GRMZM2G042664_T02	GRMZM2G042664	4	238766010	238772848	723.909	1553.46	2.14593	1.10161	302.171	1.10839e-67	5.81406e-67	1.00641e-63	8.14664e-64	1	1	seq_var
GRMZM2G043069_T01	GRMZM2G043069	8	120946357	120948469	4.50793	484.604	107.5	6.7482	471.247	1.71583e-104	1.35241e-103	1.55798e-100	1.36049e-100	1	1	seq_var
GRMZM2G043453_T01	GRMZM2G043453	5	3095928	3103654	4398.1	11312.7	2.57217	1.36299	3043.21	0	0	0	0	1	1	seq_var
GRMZM2G043822_T01	GRMZM2G043822	6	92976340	92979023	1048.78	2665.49	2.54151	1.34568	703.701	4.68678e-155	5.35295e-154	4.2556e-151	3.88347e-151	1	1	seq_var
GRMZM2G043955_T01	GRMZM2G043955	9	130770351	130772931	300.638	1202.54	3.99997	1.99999	541.14	1.06515e-119	9.66186e-119	9.67152e-116	8.60638e-116	1	1	seq_var
GRMZM2G044038_T01	GRMZM2G044038	1	56566372	56569105	996.406	2885.11	2.89551	1.53382	919.022	7.19081e-202	1.10292e-200	6.52926e-198	6.10428e-198	1	1	seq_var	cold_up; heat_down; salt_off
GRMZM2G044055_T01	GRMZM2G044055	3	167473580	167477574	386.565	810.965	2.09787	1.06893	150.406	1.4134e-34	4.69927e-34	1.28337e-30	8.97511e-31	1	1	seq_var
GRMZM2G044104_T01	GRMZM2G044104	4	5154347	5155431	120.13	436.808	3.63613	1.8624	180.065	4.69076e-41	1.74058e-40	4.25921e-37	3.11185e-37	1	1	seq_var
GRMZM2G044137_T01	GRMZM2G044137	6	155586898	155589769	106.249	1498.77	14.1062	3.81825	1208.16	1.02918e-264	2.21971e-263	9.34498e-261	8.91272e-261	1	1	seq_var
GRMZM2G044337_T01	GRMZM2G044337	8	6701812	6707293	322.981	1536.16	4.75619	2.24981	791.657	3.51626e-174	4.54163e-173	3.19277e-170	2.94592e-170	1	1	seq_var
GRMZM2G044819_T03	GRMZM2G044819	8	6103232	6151478	720.032	2624.89	3.64552	1.86612	1084.78	6.72705e-238	1.25424e-236	6.10816e-234	5.78123e-234	1	1	seq_var
GRMZM2G044862_T01	GRMZM2G044862	4	184714280	184721026	1642.57	3933.07	2.39445	1.2597	940.944	1.23384e-206	1.94163e-205	1.12032e-202	1.04925e-202	1	1	seq_var
GRMZM2G045236_T01	GRMZM2G045236	6	147087480	147092015	13.9157	470.634	33.8203	5.07982	430.485	1.27436e-95	9.30158e-95	1.15712e-91	9.98714e-92	1	1	seq_var
GRMZM2G045239_T01	GRMZM2G045239	8	167572056	167576022	4.416	364.738	82.5948	6.36798	351.702	1.8053e-78	1.07208e-77	1.63922e-74	1.36337e-74	1	1	seq_var
GRMZM2G045303_T01	GRMZM2G045303	4	26207067	26210294	519.614	1292.6	2.48761	1.31476	329.711	1.11103e-73	6.2933e-73	1.00882e-69	8.30829e-70	1	1	seq_var
GRMZM2G045330_T01	GRMZM2G045330	3	4339924	4345556	240.858	567.639	2.35674	1.23679	132.08	1.43711e-30	4.47802e-30	1.30489e-26	8.86265e-27	1	1	seq_var
GRMZM2G045955_T02	GRMZM2G045955	5	9984010	9986119	109.374	373.097	3.41122	1.77029	144.154	3.28782e-33	1.07002e-32	2.98534e-29	2.06837e-29	1	1	seq_var
GRMZM2G046092_T02	GRMZM2G046092	9	3287638	3289583	131.05	2131.01	16.2611	4.02335	1768.23	0	0	0	0	1	1	seq_var
GRMZM2G046498_T02	GRMZM2G046498	2	129933620	129939543	4329.34	11028.6	2.54741	1.34903	2922.27	0	0	0	0	1	1	seq_var
GRMZM2G046537_T01	GRMZM2G046537	8	111247996	111255975	60.9254	493.872	8.10619	3.01902	337.859	1.86739e-75	1.07588e-74	1.69559e-71	1.40147e-71	1	1	seq_var
GRMZM2G046894_T01	GRMZM2G046894	5	210880500	210913225	5.13296	808.299	157.472	7.29895	793.029	1.76856e-174	2.2908e-173	1.60585e-170	1.48205e-170	1	1	seq_var
GRMZM2G047376_T01	GRMZM2G047376	9	105271701	105276724	379.42	955.135	2.51735	1.33191	248.358	5.92102e-56	2.70573e-55	5.37629e-52	4.20037e-52	1	1	seq_var
GRMZM2G047476_T03	GRMZM2G047476	8	54058710	54063329	2.79919	859.657	307.109	8.26261	851.296	3.80091e-187	5.30142e-186	3.45122e-183	3.20417e-183	1	1	seq_var
GRMZM2G047546_T02	GRMZM2G047546	9	125311652	125317978	10.6952	3939.9	368.378	8.52504	3907.93	0	0	0	0	1	1	seq_var
GRMZM2G047588_T01	GRMZM2G047588	8	133596703	133600271	236.707	653.168	2.75939	1.46435	194.903	2.70499e-44	1.05504e-43	2.45613e-40	1.82668e-40	1	1	seq_var
GRMZM2G047763_T02	GRMZM2G047763	4	108614973	108617112	634.614	2379.07	3.74885	1.90645	1009.77	1.35088e-221	2.33193e-220	1.2266e-217	1.15568e-217	1	1	seq_var	cold_up
GRMZM2G048096_T01	GRMZM2G048096	2	199329590	199332702	24.9289	80.3279	3.22228	1.68808	29.1577	6.67184e-08	1.14866e-07	0.000605803	0.000253997	1	1	seq_var
GRMZM2G048281_T02	GRMZM2G048281	5	18558623	18563408	763.138	2221.9	2.91153	1.54178	712.885	4.71947e-157	5.4799e-156	4.28528e-153	3.91669e-153	1	1	seq_var	cold_up; salt_down
GRMZM2G048297_T01	GRMZM2G048297	4	31801236	31817019	5.99833	316.496	52.7641	5.72149	298.948	5.58507e-67	2.91451e-66	5.07124e-63	4.1e-63	1	1	seq_var
GRMZM2G048403_T01	GRMZM2G048403	1	210149799	210173485	14.4658	207.648	14.3544	3.84342	168.019	2.00377e-38	7.10989e-38	1.81942e-34	1.30686e-34	1	1	seq_var
GRMZM2G048472_T01	GRMZM2G048472	9	107429360	107439048	292.921	984.03	3.35937	1.74819	374.041	2.46818e-83	1.56721e-82	2.24111e-79	1.8884e-79	1	1	seq_var	cold_up; heat_down
GRMZM2G048843_T01	GRMZM2G048843	3	194702591	194705289	232.951	784.797	3.36894	1.75229	299.224	4.86269e-67	2.539e-66	4.41532e-63	3.57019e-63	1	1	seq_var
GRMZM2G049288_T01	GRMZM2G049288	9	112001738	112023589	361.225	1510.98	4.18295	2.06452	706.089	1.41776e-155	1.62337e-154	1.28733e-151	1.17504e-151	1	1	seq_var
GRMZM2G049347_T01	GRMZM2G049347	2	214430362	214467100	965.894	4235.67	4.38523	2.13265	2055.43	0	0	0	0	1	1	seq_var
GRMZM2G049349_T01	GRMZM2G049349	1	272284844	272287578	204.201	639.842	3.13339	1.64772	224.85	7.91773e-51	3.37526e-50	7.1893e-47	5.50361e-47	1	1	seq_var	heat_up; salt_up
GRMZM2G049538_T01	GRMZM2G049538	2	10602967	10611664	417.814	2899.95	6.94077	2.7951	1856.98	0	0	0	0	1	1	seq_var
GRMZM2G049547_T03	GRMZM2G049547	1	286777847	286784294	1582.94	3907.51	2.46852	1.30365	984.19	4.90668e-216	8.15982e-215	4.45526e-212	4.18785e-212	1	1	seq_var
GRMZM2G049695_T01	GRMZM2G049695	8	20520277	20522116	118.809	399.736	3.36452	1.7504	152.195	5.74499e-35	1.92418e-34	5.21645e-31	3.65956e-31	1	1	seq_var	salt_up; uv_up
GRMZM2G050273_T01	GRMZM2G050273	1	183706877	183707449	534.862	8587.99	16.0565	4.00508	7108.84	0	0	0	0	1	1	seq_var
GRMZM2G050307_T01	GRMZM2G050307	4	197928263	197929796	94.5377	542.929	5.74299	2.5218	315.397	1.45747e-70	7.94826e-70	1.32339e-66	1.08086e-66	1	1	seq_var	cold_up; heat_off
GRMZM2G050325_T02	GRMZM2G050325	8	3921978	3924843	134.252	548.409	4.08491	2.03031	251.26	1.37938e-56	6.35776e-56	1.25248e-52	9.80878e-53	1	1	seq_var
GRMZM2G050982_T01	GRMZM2G050982	4	25351731	25363303	236.633	1863.48	7.87499	2.97728	1260.24	4.94984e-276	1.12643e-274	4.49445e-272	4.29745e-272	1	1	seq_var
GRMZM2G051793_T01	GRMZM2G051793	7	4708398	4726962	114.751	3317.82	28.9133	4.85366	2988.91	0	0	0	0	1	1	seq_var
GRMZM2G051866_T01	GRMZM2G051866	10	130415769	130426576	87.2929	425.48	4.87416	2.28515	223.043	1.96174e-50	8.2965e-50	1.78126e-46	1.36027e-46	1	1	seq_var
GRMZM2G051952_T05	GRMZM2G051952	2	30912065	30913673	53.5694	1620.07	30.2424	4.9185	1466.22	0	0	0	0	1	1	seq_var
GRMZM2G052100_T01	GRMZM2G052100	10	116077391	116078438	4559.95	24123.1	5.2902	2.40332	13342.9	0	0	0	0	1	1	seq_var	cold_up; uv_down
GRMZM2G052418_T01	GRMZM2G052418	8	97537633	97540859	77.5535	858.986	11.076	3.46937	652.014	8.15039e-144	8.58533e-143	7.40055e-140	6.6988e-140	1	1	seq_var
GRMZM2G053284_T01	GRMZM2G053284	3	175942135	175945164	3.60333	186.878	51.8625	5.69662	176.34	3.0513e-40	1.11762e-39	2.77058e-36	2.01447e-36	1	1	seq_var
GRMZM2G053397_T01	GRMZM2G053397	6	28224104	28231439	191.988	1030.52	5.36763	2.42429	575.158	4.23896e-127	4.04304e-126	3.84897e-123	3.44585e-123	1	1	seq_var
GRMZM2G053485_T01	GRMZM2G053485	5	30459617	30460180	255.062	670.087	2.62715	1.3935	186.181	2.16712e-42	8.21261e-42	1.96774e-38	1.44872e-38	1	1	seq_var	cold_up; heat_up; salt_up; uv_up
GRMZM2G053531_T02	GRMZM2G053531	1	141939330	141946157	1994.07	5222.95	2.61924	1.38915	1444.6	0	0	0	0	1	1	seq_var
GRMZM2G053831_T01	GRMZM2G053831	9	123880654	123883539	239.029	484.359	2.02636	1.01889	83.2008	7.41287e-20	1.85987e-19	6.73089e-16	4.04891e-16	1	1	seq_var	salt_up
GRMZM2G053898_T01	GRMZM2G053898	8	161569233	161573399	1651.56	4823.47	2.92055	1.54624	1553.81	0	0	0	0	1	1	seq_var
GRMZM2G053991_T02	GRMZM2G053991	8	131904358	131906036	361.959	885.95	2.44765	1.2914	220.021	8.94863e-50	3.76523e-49	8.12536e-46	6.19514e-46	1	1	seq_var
GRMZM2G054155_T02	GRMZM2G054155	7	156311498	156314690	123.102	330.521	2.68493	1.42489	94.842	2.06201e-22	5.48741e-22	1.8723e-18	1.16895e-18	1	1	seq_var
GRMZM2G054663_T01	GRMZM2G054663	3	208134471	208137678	6.56217	442.995	67.5074	6.07697	423.692	3.83636e-94	2.76681e-93	3.48342e-90	3.0008e-90	1	1	seq_var
GRMZM2G055025_T01	GRMZM2G055025	1	22628423	22632521	245.539	1657.37	6.74992	2.75487	1047.48	8.58542e-230	1.54368e-228	7.79556e-226	7.36286e-226	1	1	seq_var
GRMZM2G055151_T01	GRMZM2G055151	5	210048396	210051676	0.022993	2308.98	100421	16.6157	2308.91	0	0	0	0	1	1	seq_var
GRMZM2G055204_T01	GRMZM2G055204	5	208210507	208213447	1350.98	5004.57	3.70439	1.88924	2100.32	0	0	0	0	1	1	seq_var
GRMZM2G055619_T01	GRMZM2G055619	5	65233075	65242474	626.796	1677.07	2.67563	1.41988	478.794	3.90933e-106	3.12197e-105	3.54968e-102	3.10558e-102	1	1	seq_var	heat_up
GRMZM2G055678_T01	GRMZM2G055678	6	134643812	134656424	33.2944	754.967	22.6755	4.50306	660.709	1.04743e-145	1.11366e-144	9.51063e-142	8.61717e-142	1	1	seq_var
GRMZM2G055699_T01	GRMZM2G055699	6	137839420	137843385	515.239	1307.69	2.53803	1.34371	344.491	6.71267e-77	3.9222e-76	6.0951e-73	5.05263e-73	1	1	seq_var	cold_off; salt_up; uv_off
GRMZM2G055857_T02	GRMZM2G055857	3	196664854	196668478	285.153	701.264	2.45925	1.29822	175.532	4.58126e-40	1.67531e-39	4.15978e-36	3.02272e-36	1	1	seq_var	salt_up; uv_down
GRMZM2G055936_T01	GRMZM2G055936	8	149893976	149898221	9.05557	5367.29	592.706	9.21117	5340.18	0	0	0	0	1	1	seq_var
GRMZM2G056079_T05	GRMZM2G056079	8	67740337	67744694	72.2292	731.418	10.1264	3.34004	540.698	1.32934e-119	1.20343e-118	1.20704e-115	1.07384e-115	1	1	seq_var
GRMZM2G056247_T01	GRMZM2G056247	8	145150494	145157581	676.204	1500.64	2.21922	1.15005	312.24	7.09995e-70	3.82824e-69	6.44676e-66	5.25184e-66	1	1	seq_var	salt_up
GRMZM2G056419_T02	GRMZM2G056419	5	215848771	215854792	270.735	590.477	2.18101	1.125	118.71	1.21221e-27	3.57481e-27	1.10068e-23	7.27567e-24	1	1	seq_var
GRMZM2G056606_T01	GRMZM2G056606	2	199098735	199107516	227.704	1030.72	4.52659	2.17843	512.417	1.88984e-113	1.59923e-112	1.71598e-109	1.51339e-109	1	1	seq_var
GRMZM2G056743_T01	GRMZM2G056743	7	137012149	137013135	1.5353	3272.55	2131.54	11.0577	3267.95	0	0	0	0	1	1	seq_var
GRMZM2G056815_T01	GRMZM2G056815	1	215043477	215044712	138.058	571.787	4.14163	2.0502	265.016	1.38394e-59	6.60337e-59	1.25662e-55	9.93396e-56	1	1	seq_var
GRMZM2G056961_T01	GRMZM2G056961	6	7162280	7163046	76.3346	254.817	3.33817	1.73906	96.1979	1.03956e-22	2.78771e-22	9.4392e-19	5.92029e-19	1	1	seq_var
GRMZM2G057459_T01	GRMZM2G057459	5	46452763	46457424	136.839	2066.91	15.1046	3.91692	1690.38	0	0	0	0	1	1	seq_var
GRMZM2G057576_T01	GRMZM2G057576	10	1135014	1145195	698.367	1713.95	2.45422	1.29527	427.557	5.52789e-95	4.02512e-94	5.01933e-91	4.33055e-91	1	1	seq_var
GRMZM2G057698_T02	GRMZM2G057698	10	140924930	140930729	231.146	739.578	3.19961	1.6779	266.299	7.26933e-60	3.4758e-59	6.60055e-56	5.22083e-56	1	1	seq_var
GRMZM2G058057_T01	GRMZM2G058057	1	249475467	249478646	174.674	451.888	2.58703	1.3713	122.649	1.66421e-28	5.00035e-28	1.51111e-24	1.00835e-24	1	1	seq_var
GRMZM2G058289_T01	GRMZM2G058289	5	215100771	215104662	395.766	822.38	2.07794	1.05516	149.407	2.33711e-34	7.75055e-34	2.1221e-30	1.48243e-30	1	1	seq_var
GRMZM2G059151_T01	GRMZM2G059151	6	115372536	115378936	480.224	2011.89	4.18948	2.06677	941.37	9.97049e-207	1.57174e-205	9.0532e-203	8.4799e-203	1	1	seq_var
GRMZM2G059191_T01	GRMZM2G059191	8	156995161	156998789	5961.31	41641.7	6.98532	2.80433	26743.9	0	0	0	0	1	1	seq_var
GRMZM2G059252_T01	GRMZM2G059252	4	192992903	192995454	1036.84	2330.68	2.24788	1.16857	497.115	4.0342e-110	3.32703e-109	3.66306e-106	3.21929e-106	1	1	seq_var
GRMZM2G059801_T01	GRMZM2G059801	3	201119095	201130454	82.8582	10863.7	131.112	7.03466	10617.6	0	0	0	0	1	1	seq_var
GRMZM2G060011_T01	GRMZM2G060011	2	206790797	206793971	92.2474	550.848	5.97142	2.57807	327.034	4.25313e-73	2.39271e-72	3.86184e-69	3.17581e-69	1	1	seq_var
GRMZM2G060160_T01	GRMZM2G060160	2	214616932	214622028	80.0231	2525.6	31.5609	4.98007	2295.36	0	0	0	0	1	1	seq_var
GRMZM2G060183_T01	GRMZM2G060183	10	29543777	29545889	1e-06	727.549	727548671	29.4385	727.549	3.05653e-160	3.64216e-159	2.77533e-156	2.54272e-156	1	1	seq_var
GRMZM2G060373_T01	GRMZM2G060373	6	22305115	22306652	142.092	294.969	2.0759	1.05374	53.4739	2.62056e-13	5.48645e-13	2.37947e-09	1.2432e-09	1	1	seq_var
GRMZM2G060896_T02	GRMZM2G060896	4	226043211	226060591	517.337	2462.21	4.75939	2.25078	1269.5	4.80575e-278	1.10752e-276	4.36362e-274	4.17476e-274	1	1	seq_var	salt_up
GRMZM2G060940_T03	GRMZM2G060940	5	18192142	18193644	55.449	226.349	4.08211	2.02932	103.644	2.42091e-24	6.71818e-24	2.19819e-20	1.40631e-20	1	1	seq_var
GRMZM2G061105_T01	GRMZM2G061105	6	153327736	153331920	372.197	1177.36	3.16328	1.66142	418.373	5.51594e-93	3.91593e-92	5.00847e-89	4.30354e-89	1	1	seq_var
GRMZM2G061798_T01	GRMZM2G061798	3	11540974	11541721	110.335	238.354	2.16028	1.11122	47.0016	7.09287e-12	1.41608e-11	6.44033e-08	3.2152e-08	1	1	seq_var
GRMZM2G062042_T02	GRMZM2G062042	8	87024921	87031981	4.86121	20964.1	4312.53	12.0743	20949.5	0	0	0	0	1	1	seq_var
GRMZM2G062394_T01	GRMZM2G062394	1	290174531	290179401	425.083	917.139	2.15755	1.10939	180.387	3.99024e-41	1.48186e-40	3.62314e-37	2.64792e-37	1	1	seq_var
GRMZM2G063328_T01	GRMZM2G063328	2	4355549	4372250	579.568	1184	2.0429	1.03062	207.159	5.72478e-47	2.32058e-46	5.1981e-43	3.91632e-43	1	1	seq_var
GRMZM2G063431_T01	GRMZM2G063431	8	146158331	146159609	83.3744	367.166	4.40382	2.13876	178.758	9.04877e-41	3.33453e-40	8.21628e-37	5.98757e-37	1	1	seq_var
GRMZM2G063473_T01	GRMZM2G063473	4	166951520	166955204	1074.07	2153.76	2.00524	1.00377	361.153	1.5797e-80	9.60086e-80	1.43437e-76	1.19852e-76	1	1	seq_var
GRMZM2G064001_T01	GRMZM2G064001	6	123949570	123953272	7948.86	21303.5	2.68007	1.42227	6096.82	0	0	0	0	1	1	seq_var
GRMZM2G064336_T01	GRMZM2G064336	8	148049588	148054134	1621.9	3590.76	2.21393	1.14661	743.654	9.621e-164	1.17576e-162	8.73587e-160	8.02199e-160	1	1	seq_var
GRMZM2G064466_T01	GRMZM2G064466	1	82921613	82926989	472.506	1227.62	2.5981	1.37746	335.385	6.45644e-75	3.70338e-74	5.86245e-71	4.84104e-71	1	1	seq_var
GRMZM2G064473_T01	GRMZM2G064473	3	214552561	214558272	224.313	692.743	3.08829	1.62681	239.273	5.66576e-54	2.52553e-53	5.14451e-50	3.99096e-50	1	1	seq_var	heat_down; uv_up
GRMZM2G064914_T02	GRMZM2G064914	3	167730339	167734212	1245.27	2738.63	2.19922	1.13699	559.779	9.39049e-124	8.72729e-123	8.52657e-120	7.61005e-120	1	1	seq_var
GRMZM2G064954_T01	GRMZM2G064954	8	160653050	160657235	2e-06	914.311	4.57155e+08	28.7681	914.311	7.60143e-201	1.1542e-199	6.9021e-197	6.4483e-197	1	1	seq_var
GRMZM2G065040_T01	GRMZM2G065040	7	4311957	4313916	1.16734	1231.76	1055.18	10.0433	1228.26	4.39705e-269	9.73786e-268	3.99252e-265	3.81268e-265	1	1	seq_var
GRMZM2G065171_T01	GRMZM2G065171	2	43429634	43434223	91.6452	188.979	2.06207	1.04409	33.7599	6.23521e-09	1.11999e-08	5.66157e-05	2.5103e-05	1	1	seq_var
GRMZM2G065829_T01	GRMZM2G065829	8	141446174	141448081	222.193	1259.57	5.66882	2.50305	726.267	5.80677e-160	6.89222e-159	5.27255e-156	4.82891e-156	1	1	seq_var
GRMZM2G065839_T01	GRMZM2G065839	2	80474031	80501880	1084.6	2675.18	2.46652	1.30248	672.9	2.33868e-148	2.53404e-147	2.12353e-144	1.92778e-144	1	1	seq_var
GRMZM2G066222_T02	GRMZM2G066222	4	218055804	218057037	10.819	681.431	62.9847	5.97693	649.65	2.66216e-143	2.77844e-142	2.41724e-139	2.1859e-139	1	1	seq_var
GRMZM2G066441_T01	GRMZM2G066441	1	81219487	81222936	122.197	714.161	5.84434	2.54704	418.985	4.05843e-93	2.88571e-92	3.68505e-89	3.1672e-89	1	1	seq_var	cold_on; salt_on; uv_on
GRMZM2G066469_T01	GRMZM2G066469	10	146126909	146135084	7.16866	368.845	51.4525	5.68517	347.886	1.22334e-77	7.19891e-77	1.11079e-73	9.22153e-74	1	1	seq_var
GRMZM2G066885_T01	GRMZM2G066885	5	189091828	189094008	46.344	2208.66	47.6578	5.57464	2073.43	0	0	0	0	1	1	seq_var	salt_up; uv_off
GRMZM2G066981_T01	GRMZM2G066981	10	146110506	146116814	125.934	266.104	2.11305	1.07933	50.1169	1.44854e-12	2.965e-12	1.31527e-08	6.72846e-09	1	1	seq_var
GRMZM2G067600_T01	GRMZM2G067600	3	214901790	214902528	236.326	1902.3	8.04944	3.00889	1297.78	3.43936e-284	8.0696e-283	3.12294e-280	2.99018e-280	1	1	seq_var	salt_up; uv_down
GRMZM2G067747_T04	GRMZM2G067747	7	78814320	78837309	0.004061	2144.54	528081	19.0104	2144.53	0	0	0	0	1	1	seq_var
GRMZM2G068471_T01	GRMZM2G068471	1	264150094	264157168	262.753	1304.97	4.96652	2.31223	692.861	1.06707e-152	1.19765e-151	9.68899e-149	8.8268e-149	1	1	seq_var
GRMZM2G068506_T02	GRMZM2G068506	4	58979526	58985265	137.924	791.832	5.74108	2.52132	459.901	5.0511e-102	3.87692e-101	4.5864e-98	3.98936e-98	1	1	seq_var
GRMZM2G069678_T01	GRMZM2G069678	4	122894840	122904222	108.572	938.647	8.64538	3.11193	657.956	4.15708e-145	4.39934e-144	3.77463e-141	3.41837e-141	1	1	seq_var
GRMZM2G069713_T01	GRMZM2G069713	6	139060066	139063172	1537.05	5391.92	3.50797	1.81064	2144.62	0	0	0	0	1	1	seq_var	salt_up
GRMZM2G069856_T01	GRMZM2G069856	2	61290418	61296910	82.2808	284.746	3.46066	1.79105	111.687	4.18392e-26	1.20412e-25	3.799e-22	2.47939e-22	1	1	seq_var
GRMZM2G070508_T02	GRMZM2G070508	4	230384824	230387143	113.631	467.231	4.11183	2.03978	215.254	9.80937e-49	4.06522e-48	8.90691e-45	6.75865e-45	1	1	seq_var
GRMZM2G070563_T01	GRMZM2G070563	2	216298100	216300491	33.6737	623.095	18.5039	4.20976	528.98	4.70762e-117	4.12201e-116	4.27452e-113	3.78681e-113	1	1	seq_var	heat_up; salt_up; uv_off
GRMZM2G070831_T01	GRMZM2G070831	2	226435628	226438530	92.3417	243.992	2.64227	1.40178	68.3777	1.34995e-16	3.11977e-16	1.22576e-12	6.95496e-13	1	1	seq_var
GRMZM2G071071_T01	GRMZM2G071071	5	3196192	3207509	301.29	780.654	2.59104	1.37353	212.386	4.1423e-48	1.70499e-47	3.76121e-44	2.84783e-44	1	1	seq_var
GRMZM2G071294_T02	GRMZM2G071294	7	9910307	9912620	306.798	1060.77	3.45756	1.78975	415.684	2.12308e-92	1.49439e-91	1.92776e-88	1.65409e-88	1	1	seq_var
GRMZM2G071468_T01	GRMZM2G071468	5	192547214	192555085	22.334	562.971	25.2069	4.65575	499.378	1.29823e-110	1.07456e-109	1.17879e-106	1.03651e-106	1	1	seq_var
GRMZM2G071638_T01	GRMZM2G071638	6	106344609	106349816	112.168	305.281	2.72165	1.44448	89.3349	3.33335e-21	8.65012e-21	3.02668e-17	1.86067e-17	1	1	seq_var
GRMZM2G071907_T02	GRMZM2G071907	2	11760940	11762535	196.652	547.945	2.78637	1.47839	165.737	6.31551e-38	2.21837e-37	5.73449e-34	4.10256e-34	1	1	seq_var	salt_up
GRMZM2G072029_T01	GRMZM2G072029	8	27121881	27124303	235.525	659.427	2.79982	1.48533	200.785	1.40796e-45	5.61204e-45	1.27842e-41	9.57832e-42	1	1	seq_var	heat_on; salt_on; uv_on
GRMZM2G072041_T01	GRMZM2G072041	1	30891547	30895201	353.813	820.91	2.32018	1.21424	185.728	2.72134e-42	1.02786e-41	2.47098e-38	1.81704e-38	1	1	seq_var
GRMZM2G072238_T02	GRMZM2G072238	8	110718416	110725175	220.967	885.344	4.00667	2.0024	398.98	9.18209e-89	6.21262e-88	8.33733e-85	7.10602e-85	1	1	seq_var
GRMZM2G072529_T01	GRMZM2G072529	10	90301775	90303069	153.654	1067.86	6.94973	2.79696	684.205	8.13625e-151	9.02041e-150	7.38772e-147	6.72217e-147	1	1	seq_var	cold_up; heat_up; salt_up; uv_up
GRMZM2G072632_T01	GRMZM2G072632	10	90297677	90299717	46.312	461.101	9.9564	3.31562	339.072	1.01598e-75	5.88334e-75	9.22508e-72	7.63304e-72	1	1	seq_var	heat_up; salt_up; uv_off
GRMZM2G073077_T01	GRMZM2G073077	10	65109308	65112441	529.335	1184.1	2.23696	1.16154	250.211	2.3361e-56	1.07401e-55	2.12118e-52	1.66003e-52	1	1	seq_var
GRMZM2G074097_T01	GRMZM2G074097	3	218917243	218918947	46.8631	935.229	19.9566	4.3188	803.584	8.96955e-177	1.17523e-175	8.14435e-173	7.52366e-173	1	1	seq_var	cold_up; heat_down; uv_down
GRMZM2G074122_T01	GRMZM2G074122	4	227807369	227818655	212.371	959.473	4.5179	2.17565	476.31	1.35745e-105	1.07741e-104	1.23256e-101	1.0774e-101	1	1	seq_var
GRMZM2G074169_T01	GRMZM2G074169	5	21601089	21603875	484.879	2254.98	4.65061	2.21742	1143.59	1.11111e-250	2.22712e-249	1.00889e-246	9.58665e-247	1	1	seq_var
GRMZM2G074173_T01	GRMZM2G074173	4	151308793	151311440	41.3139	911.3	22.058	4.46323	794.525	8.36364e-175	1.08644e-173	7.59418e-171	7.0104e-171	1	1	seq_var
GRMZM2G074193_T01	GRMZM2G074193	1	248910288	248914268	182.58	414.437	2.26989	1.18262	90.0436	2.32963e-21	6.06975e-21	2.11531e-17	1.30366e-17	1	1	seq_var	heat_up; salt_up
GRMZM2G074282_T03	GRMZM2G074282	5	66455376	66458642	8887.74	18190.9	2.04674	1.03333	3196.21	0	0	0	0	1	1	seq_var
GRMZM2G074386_T07	GRMZM2G074386	7	136605465	136606817	94.7654	235.773	2.48796	1.31497	60.1537	8.77305e-15	1.9274e-14	7.96593e-11	4.34091e-11	1	1	seq_var
GRMZM2G074821_T01	GRMZM2G074821	3	211462363	211466298	258.145	941.45	3.64698	1.8667	389.219	1.22409e-86	8.07754e-86	1.11147e-82	9.43158e-83	1	1	seq_var
GRMZM2G074914_T01	GRMZM2G074914	2	58290288	58292895	79.3424	383.858	4.83799	2.27441	200.194	1.8949e-45	7.54637e-45	1.72057e-41	1.28872e-41	1	1	seq_var
GRMZM2G075333_T01	GRMZM2G075333	5	89189678	89194264	255.131	607.848	2.38249	1.25247	144.162	3.27477e-33	1.06615e-32	2.9735e-29	2.06049e-29	1	1	seq_var
GRMZM2G075900_T01	GRMZM2G075900	3	118181859	118192369	676.609	2060.91	3.04595	1.60689	700.013	2.97139e-154	3.37675e-153	2.69802e-150	2.4609e-150	1	1	seq_var
GRMZM2G076204_T02	GRMZM2G076204	2	13004989	13006923	154.495	438.67	2.83939	1.50558	136.144	1.8559e-31	5.86141e-31	1.68515e-27	1.15177e-27	1	1	seq_var
GRMZM2G076524_T02	GRMZM2G076524	5	13264673	13269113	17.1037	1724.82	100.845	6.65599	1674.18	0	0	0	0	1	1	seq_var
GRMZM2G076544_T01	GRMZM2G076544	8	134672877	134675264	1283.81	2707.04	2.10861	1.07629	507.561	2.1522e-112	1.80776e-111	1.95419e-108	1.72176e-108	1	1	seq_var
GRMZM2G077015_T01	GRMZM2G077015	3	136606240	136609821	4358.9	12305.2	2.82301	1.49723	3789.22	0	0	0	0	1	1	seq_var
GRMZM2G077258_T01	GRMZM2G077258	4	163422412	163428013	224.584	1859.64	8.28038	3.0497	1282.69	6.54361e-281	1.51959e-279	5.9416e-277	5.6864e-277	1	1	seq_var
GRMZM2G077486_T01	GRMZM2G077486	10	80419760	80423498	486.881	1229.45	2.52515	1.33637	321.271	7.65568e-72	4.24122e-71	6.95136e-68	5.69736e-68	1	1	seq_var
GRMZM2G077490_T01	GRMZM2G077490	6	168306177	168308256	401.818	881.961	2.19493	1.13417	179.577	5.99538e-41	2.22015e-40	5.4438e-37	3.97433e-37	1	1	seq_var
GRMZM2G077823_T01	GRMZM2G077823	2	213013815	213018729	212.447	2039.04	9.59786	3.26271	1481.88	0	0	0	0	1	1	seq_var	salt_up
GRMZM2G077844_T03	GRMZM2G077844	9	54493466	54515469	920.6	2199.32	2.38901	1.25641	524.092	5.4474e-116	4.72872e-115	4.94624e-112	4.37699e-112	1	1	seq_var
GRMZM2G078946_T01	GRMZM2G078946	2	229486950	229489245	123.917	298.58	2.40951	1.26874	72.2064	1.9383e-17	4.58567e-17	1.75998e-13	1.01625e-13	1	1	seq_var
GRMZM2G079098_T01	GRMZM2G079098	4	23798868	23801990	423.175	890.954	2.1054	1.0741	166.511	4.27833e-38	1.50746e-37	3.88473e-34	2.78263e-34	1	1	seq_var
GRMZM2G079236_T01	GRMZM2G079236	2	150152533	150159396	673.439	2083.15	3.0933	1.62915	720.92	8.44681e-159	9.96065e-158	7.6697e-155	7.02014e-155	1	1	seq_var
GRMZM2G079281_T01	GRMZM2G079281	2	224164426	224165180	36.6961	423.323	11.5359	3.52806	324.943	1.2138e-72	6.80327e-72	1.10213e-68	9.05615e-69	1	1	seq_var	salt_up; uv_down
GRMZM2G079348_T01	GRMZM2G079348	4	240652035	240655881	4722.51	10169.2	2.15335	1.10658	1992.16	0	0	0	0	1	1	seq_var
GRMZM2G079452_T01	GRMZM2G079452	4	16807094	16815389	481.351	1537.83	3.19483	1.67574	552.775	3.13479e-122	2.88097e-121	2.84639e-118	2.53699e-118	1	1	seq_var
GRMZM2G080509_T01	GRMZM2G080509	6	87858244	87863266	369.374	1253.25	3.39289	1.76252	481.462	1.02686e-106	8.22936e-106	9.32387e-103	8.16146e-103	1	1	seq_var
GRMZM2G080521_T01	GRMZM2G080521	8	17880157	17893174	332.19	728.196	2.1921	1.13232	147.89	5.01384e-34	1.65488e-33	4.55257e-30	3.17376e-30	1	1	seq_var
GRMZM2G081151_T01	GRMZM2G081151	1	160303288	160473130	11.4739	93.7793	8.17326	3.03091	64.3607	1.03602e-15	2.33601e-15	9.4071e-12	5.23607e-12	1	1	seq_var
GRMZM2G081406_T01	GRMZM2G081406	4	143829841	143832631	114.386	358.117	3.13076	1.64652	125.723	3.53526e-29	1.07322e-28	3.21001e-25	2.15297e-25	1	1	seq_var
GRMZM2G081571_T05	GRMZM2G081571	2	199224763	199231073	842.599	1824.69	2.16555	1.11474	361.607	1.25811e-80	7.67719e-80	1.14237e-76	9.55284e-77	1	1	seq_var	salt_up
GRMZM2G081826_T01	GRMZM2G081826	5	183531041	183533658	1348.38	2744.66	2.03553	1.0254	476.32	1.35027e-105	1.07266e-104	1.22605e-101	1.07185e-101	1	1	seq_var
GRMZM2G081907_T01	GRMZM2G081907	5	215667102	215675474	40.839	219.444	5.37338	2.42583	122.558	1.74267e-28	5.23436e-28	1.58235e-24	1.05571e-24	1	1	seq_var
GRMZM2G082019_T01	GRMZM2G082019	7	98584060	98587303	424.751	980.712	2.30891	1.20721	219.923	9.40289e-50	3.9527e-49	8.53783e-46	6.50774e-46	1	1	seq_var
GRMZM2G082180_T01	GRMZM2G082180	4	75721475	75725072	210.185	478.008	2.27422	1.18537	104.228	1.80304e-24	5.01734e-24	1.63716e-20	1.04901e-20	1	1	seq_var	cold_up
GRMZM2G082573_T01	GRMZM2G082573	1	200455729	200460521	26.2827	272.212	10.3571	3.37255	202.621	5.59551e-46	2.24315e-45	5.08073e-42	3.8139e-42	1	1	seq_var
GRMZM2G082809_T01	GRMZM2G082809	2	233657043	233662860	246.642	540.842	2.19282	1.13279	109.911	1.0247e-25	2.92312e-25	9.30429e-22	6.04369e-22	1	1	seq_var
GRMZM2G083081_T01	GRMZM2G083081	5	921583	923926	87.6999	186.901	2.13114	1.09163	35.837	2.14534e-09	3.92736e-09	1.94797e-05	8.84094e-06	1	1	seq_var
GRMZM2G083374_T01	GRMZM2G083374	3	9771491	9806320	1753.71	3606.55	2.05653	1.04021	640.458	2.65645e-141	2.74409e-140	2.41206e-137	2.17882e-137	1	1	seq_var
GRMZM2G083504_T01	GRMZM2G083504	2	192028339	192031016	178.792	723.366	4.04585	2.01644	328.724	1.82299e-73	1.03068e-72	1.65528e-69	1.36269e-69	1	1	seq_var
GRMZM2G083642_T01	GRMZM2G083642	1	71344843	71347874	233.725	651.267	2.78646	1.47843	196.997	9.44407e-45	3.71382e-44	8.57522e-41	6.39553e-41	1	1	seq_var
GRMZM2G084369_T05	GRMZM2G084369	8	129225283	129228409	419.653	1253.12	2.98608	1.57825	415.276	2.60387e-92	1.82855e-91	2.36432e-88	2.0279e-88	1	1	seq_var
GRMZM2G084421_T01	GRMZM2G084421	8	103200941	103201371	59.545	1027.32	17.2529	4.10876	861.735	2.04299e-189	2.89397e-188	1.85504e-185	1.72428e-185	1	1	seq_var
GRMZM2G084465_T03	GRMZM2G084465	3	182334253	182336139	305.892	654.772	2.14054	1.09797	126.702	2.15904e-29	6.58517e-29	1.96041e-25	1.31788e-25	1	1	seq_var
GRMZM2G084694_T01	GRMZM2G084694	3	60780097	60783964	2970.52	6369.67	2.14429	1.1005	1237.04	5.43004e-271	1.2174e-269	4.93048e-267	4.7111e-267	1	1	seq_var
GRMZM2G084868_T03	GRMZM2G084868	4	51745820	51747254	100.131	294.944	2.94558	1.55855	96.0632	1.11274e-22	2.9822e-22	1.01037e-18	6.33483e-19	1	1	seq_var
GRMZM2G085078_T01	GRMZM2G085078	3	208411907	208423617	2708.34	5487.26	2.02606	1.01868	942.258	6.39115e-207	1.00925e-205	5.80316e-203	5.43631e-203	1	1	seq_var	salt_up; uv_up
GRMZM2G085711_T02	GRMZM2G085711	4	11480620	11484467	285.165	615.159	2.15721	1.10917	120.953	3.91364e-28	1.16473e-27	3.55359e-24	2.35993e-24	1	1	seq_var
GRMZM2G085812_T01	GRMZM2G085812	9	127708343	127709216	6.39935	331.707	51.8345	5.69584	312.993	4.86609e-70	2.62844e-69	4.41841e-66	3.60091e-66	1	1	seq_var
GRMZM2G085872_T01	GRMZM2G085872	1	2734521	2739053	38.7245	454.151	11.7277	3.55185	350.147	3.93589e-78	2.33124e-77	3.57378e-74	2.97081e-74	1	1	seq_var
GRMZM2G085921_T01	GRMZM2G085921	8	30190407	30194242	10.7076	137.866	12.8755	3.68655	108.83	1.76831e-25	5.01914e-25	1.60562e-21	1.04012e-21	1	1	seq_var
GRMZM2G085924_T01	GRMZM2G085924	2	127723813	127725400	3412.45	19848.5	5.81649	2.54015	11613.6	0	0	0	0	1	1	seq_var
GRMZM2G086365_T01	GRMZM2G086365	1	181915870	181916601	169.286	396.787	2.34388	1.2289	91.4309	1.15559e-21	3.03085e-21	1.04928e-17	6.49328e-18	1	1	seq_var
GRMZM2G086418_T02	GRMZM2G086418	2	162585368	162595679	66.0834	987.89	14.9491	3.90199	806.214	2.40513e-177	3.15586e-176	2.18386e-173	2.01766e-173	1	1	seq_var
GRMZM2G086430_T01	GRMZM2G086430	2	16359701	16365072	18.12	271.164	14.9649	3.90351	221.344	4.60551e-50	1.94231e-49	4.1818e-46	3.1907e-46	1	1	seq_var
GRMZM2G086484_T03	GRMZM2G086484	2	16372293	16379991	9.91504	1130.47	114.016	6.83309	1101.07	1.93151e-241	3.66906e-240	1.75381e-237	1.66168e-237	1	1	seq_var
GRMZM2G086489_T01	GRMZM2G086489	2	4629897	4642690	0.001683	8831.59	5.24753e+06	22.3232	8831.59	0	0	0	0	1	1	seq_var
GRMZM2G086553_T03	GRMZM2G086553	10	135597643	135602163	246.111	682.493	2.77311	1.47151	205.071	1.63442e-46	6.58408e-46	1.48405e-42	1.11582e-42	1	1	seq_var
GRMZM2G086789_T01	GRMZM2G086789	4	29500520	29503134	463	932.081	2.01313	1.00944	157.723	3.55733e-36	1.21339e-35	3.23005e-32	2.28345e-32	1	1	seq_var
GRMZM2G087254_T01	GRMZM2G087254	2	203181028	203184356	133.186	284.256	2.13428	1.09375	54.6718	1.42438e-13	3.00916e-13	1.29334e-09	6.81281e-10	1	1	seq_var	cold_up; heat_up
GRMZM2G087312_T03	GRMZM2G087312	2	191806427	191809938	74.587	333.804	4.47537	2.16201	164.532	1.1573e-37	4.037e-37	1.05083e-33	7.49701e-34	1	1	seq_var
GRMZM2G087323_T01	GRMZM2G087323	4	132787074	132790535	136.605	295.642	2.16421	1.11384	58.5147	2.01776e-14	4.38307e-14	1.83212e-10	9.88903e-11	1	1	seq_var
GRMZM2G087513_T02	GRMZM2G087513	3	138654352	138671970	89.8583	695.307	7.73782	2.95193	466.868	1.53962e-103	1.19998e-102	1.39798e-99	1.21877e-99	1	1	seq_var
GRMZM2G087582_T01	GRMZM2G087582	3	138664798	138667327	3.00396	284.545	94.7233	6.56565	275.659	6.632e-62	3.2533e-61	6.02186e-58	4.79494e-58	1	1	seq_var
GRMZM2G087612_T01	GRMZM2G087612	1	291937388	291941593	438.338	988.45	2.25499	1.17312	212.101	4.7815e-48	1.96453e-47	4.3416e-44	3.28537e-44	1	1	seq_var
GRMZM2G087758_T03	GRMZM2G087758	6	144965870	144972132	657.423	2643	4.02024	2.00728	1194.55	9.32626e-262	1.95572e-260	8.46825e-258	8.06535e-258	1	1	seq_var
GRMZM2G088064_T03	GRMZM2G088064	5	37251427	37256273	98.1325	39372.2	401.215	8.64823	39078.8	0	0	0	0	1	1	seq_var	salt_up; uv_off
GRMZM2G088231_T01	GRMZM2G088231	8	5678583	5684878	782.364	1784.34	2.2807	1.18948	391.146	4.66009e-87	3.08858e-86	4.23136e-83	3.59339e-83	1	1	seq_var
GRMZM2G088436_T04	GRMZM2G088436	3	215251826	215263404	88.327	2246.32	25.4319	4.66857	1994.71	0	0	0	0	1	1	seq_var
GRMZM2G089159_T01	GRMZM2G089159	2	207080135	207083546	665.657	2377.64	3.57187	1.83668	963.061	1.92153e-211	3.10453e-210	1.74474e-207	1.63695e-207	1	1	seq_var
GRMZM2G089193_T01	GRMZM2G089193	7	8933566	8935926	222.849	496.469	2.22782	1.15564	104.082	1.94147e-24	5.39593e-24	1.76285e-20	1.12877e-20	1	1	seq_var
GRMZM2G089218_T01	GRMZM2G089218	6	139350390	139351526	1.70162	235.516	138.407	7.11277	230.46	4.73142e-52	2.04968e-51	4.29613e-48	3.3049e-48	1	1	seq_var
GRMZM2G089259_T01	GRMZM2G089259	4	207435849	207441062	82.8735	571.518	6.89627	2.78582	364.879	2.43915e-81	1.51074e-80	2.21475e-77	1.85742e-77	1	1	seq_var
GRMZM2G089355_T01	GRMZM2G089355	8	120657557	120659685	43.6952	170.954	3.91241	1.96806	75.4475	3.75246e-18	9.02579e-18	3.40724e-14	1.99106e-14	1	1	seq_var	cold_up
GRMZM2G089631_T01	GRMZM2G089631	1	214531076	214536331	32.1945	394.302	12.2475	3.61442	307.439	7.89018e-69	4.197e-68	7.16429e-65	5.81822e-65	1	1	seq_var
GRMZM2G090010_T01	GRMZM2G090010	4	26450942	26455727	88.7014	558.213	6.29317	2.65379	340.758	4.36357e-76	2.53333e-75	3.96212e-72	3.2801e-72	1	1	seq_var	cold_up
GRMZM2G090217_T02	GRMZM2G090217	1	251873300	251880104	54.4988	242.282	4.44563	2.15239	118.816	1.14891e-27	3.39035e-27	1.04321e-23	6.89807e-24	1	1	seq_var
GRMZM2G090576_T01	GRMZM2G090576	5	20815035	20817354	247.394	672.962	2.7202	1.44371	196.781	1.0529e-44	4.13508e-44	9.56031e-41	7.12706e-41	1	1	seq_var
GRMZM2G090642_T01	GRMZM2G090642	5	20822729	20824448	92.3354	230.792	2.49949	1.32164	59.327	1.33532e-14	2.91459e-14	1.21247e-10	6.57111e-11	1	1	seq_var
GRMZM2G091189_T02	GRMZM2G091189	4	176529663	176531723	64.7001	349.466	5.40131	2.43331	195.795	1.72822e-44	6.75808e-44	1.56923e-40	1.16811e-40	1	1	seq_var
GRMZM2G091245_T01	GRMZM2G091245	4	59049289	59064769	941.42	1953.92	2.07551	1.05346	354.074	5.49571e-79	3.27865e-78	4.99011e-75	4.15421e-75	1	1	seq_var
GRMZM2G091419_T01	GRMZM2G091419	8	163288195	163292627	151.806	714.023	4.70352	2.23374	365.069	2.21687e-81	1.37494e-80	2.01292e-77	1.68859e-77	1	1	seq_var
GRMZM2G091456_T01	GRMZM2G091456	1	29400631	29405496	626.807	1450.49	2.3141	1.21045	326.607	5.27079e-73	2.95607e-72	4.78588e-69	3.93307e-69	1	1	seq_var
GRMZM2G091560_T01	GRMZM2G091560	4	191052633	191057158	1849.75	3824.16	2.0674	1.04781	687.059	1.94922e-151	2.16899e-150	1.76989e-147	1.61103e-147	1	1	seq_var
GRMZM2G092129_T02	GRMZM2G092129	7	34183730	34198384	802.988	1766.42	2.1998	1.13737	361.249	1.50544e-80	9.16795e-80	1.36694e-76	1.14263e-76	1	1	seq_var
GRMZM2G092154_T01	GRMZM2G092154	5	139803261	139808962	1073.31	2183.42	2.03428	1.02452	378.395	2.78254e-84	1.78807e-83	2.52654e-80	2.13365e-80	1	1	seq_var	cold_up
GRMZM2G092363_T01	GRMZM2G092363	10	54474926	54476332	320.28	743.308	2.32081	1.21463	168.254	1.78049e-38	6.33249e-38	1.61668e-34	1.1623e-34	1	1	seq_var
GRMZM2G093526_T01	GRMZM2G093526	2	10574515	10578571	815.531	6437.62	7.89378	2.98072	4357.82	0	0	0	0	1	1	seq_var	cold_up; salt_up
GRMZM2G093708_T01	GRMZM2G093708	1	242559202	242560900	19.5696	240.857	12.3077	3.62149	188.03	8.55638e-43	3.26574e-42	7.76919e-39	5.73448e-39	1	1	seq_var
GRMZM2G094655_T03	GRMZM2G094655	5	191166969	191170238	66.5859	396.436	5.95374	2.5738	234.98	4.89039e-53	2.15035e-52	4.44048e-49	3.4311e-49	1	1	seq_var
GRMZM2G094698_T01	GRMZM2G094698	1	262785068	262791083	437.743	1862.56	4.25491	2.08913	882.536	6.14265e-194	8.89557e-193	5.57753e-190	5.193e-190	1	1	seq_var
GRMZM2G094705_T01	GRMZM2G094705	5	191171285	191180578	214.121	613.69	2.8661	1.51909	192.865	7.53245e-44	2.91786e-43	6.83946e-40	5.07461e-40	1	1	seq_var
GRMZM2G095299_T01	GRMZM2G095299	5	182486593	182488058	3905.51	13365	3.4221	1.77488	5181.24	0	0	0	0	1	1	seq_var
GRMZM2G095611_T03	GRMZM2G095611	8	166471154	166476626	179.899	445.993	2.47913	1.30984	113.128	2.02238e-26	5.85936e-26	1.83632e-22	1.20271e-22	1	1	seq_var
GRMZM2G095646_T02	GRMZM2G095646	6	153175296	153178176	12.952	133.518	10.3086	3.36578	99.243	2.23347e-23	6.07729e-23	2.02799e-19	1.28291e-19	1	1	seq_var
GRMZM2G095657_T02	GRMZM2G095657	8	3103267	3116080	118.821	291.985	2.45736	1.29711	72.9928	1.30126e-17	3.09223e-17	1.18154e-13	6.8446e-14	1	1	seq_var
GRMZM2G095782_T01	GRMZM2G095782	5	178082940	178089592	66.758	1099.05	16.4632	4.04118	914.069	8.57777e-201	1.30027e-199	7.78862e-197	7.27567e-197	1	1	seq_var
GRMZM2G095931_T01	GRMZM2G095931	1	215494635	215499049	293.933	845.681	2.87712	1.52463	267.131	4.78911e-60	2.29837e-59	4.34852e-56	3.44289e-56	1	1	seq_var
GRMZM2G096228_T02	GRMZM2G096228	5	37397041	37398843	98.6119	460.159	4.66636	2.2223	233.936	8.26189e-53	3.62231e-52	7.5018e-49	5.79159e-49	1	1	seq_var
GRMZM2G096663_T02	GRMZM2G096663	2	125895680	125896981	727.087	2495.32	3.43194	1.77903	970.285	5.16897e-213	8.45662e-212	4.69342e-209	4.40706e-209	1	1	seq_var
GRMZM2G097226_T01	GRMZM2G097226	2	193226331	193233048	161.457	493.771	3.05822	1.61269	168.541	1.5413e-38	5.49254e-38	1.3995e-34	1.00693e-34	1	1	seq_var
GRMZM2G097457_T01	GRMZM2G097457	8	106530187	106541052	5551.57	175860	31.6775	4.98539	159885	0	0	0	0	1	1	seq_var
GRMZM2G097568_T04	GRMZM2G097568	2	218307729	218309990	327.581	1645.73	5.02388	2.3288	880.508	1.6952e-193	2.44712e-192	1.53924e-189	1.43278e-189	1	1	seq_var
GRMZM2G097983_T01	GRMZM2G097983	9	54415231	54417350	5.02728	1000.71	199.056	7.63703	985.731	2.26898e-216	3.78024e-215	2.06023e-212	1.9368e-212	1	1	seq_var	cold_on
GRMZM2G098129_T01	GRMZM2G098129	8	68925472	68932648	155.048	401.682	2.5907	1.37334	109.261	1.42292e-25	4.04513e-25	1.29201e-21	8.37675e-22	1	1	seq_var	heat_up
GRMZM2G098298_T01	GRMZM2G098298	5	158904820	158908319	2642.74	6109.94	2.31197	1.20912	1373.46	1.22707e-300	3.10357e-299	1.11418e-296	1.07025e-296	1	1	seq_var	cold_up
GRMZM2G098346_T01	GRMZM2G098346	4	13409584	13412986	952.868	3636.66	3.81655	1.93227	1569.39	0	0	0	0	1	1	seq_var
GRMZM2G098721_T01	GRMZM2G098721	9	19013738	19022646	428.436	2942.73	6.86853	2.78	1875.22	0	0	0	0	1	1	seq_var
GRMZM2G099003_T01	GRMZM2G099003	3	56900210	56902028	644.885	1765.05	2.737	1.45259	520.663	3.03526e-115	2.60986e-114	2.75601e-111	2.43579e-111	1	1	seq_var	cold_off; heat_up; salt_up; uv_off
GRMZM2G099045_T01	GRMZM2G099045	8	169340592	169344491	4424.3	15587	3.52304	1.81682	6226.76	0	0	0	0	1	1	seq_var
GRMZM2G099166_T01	GRMZM2G099166	3	202018877	202020411	7.60223	74.7441	9.83187	3.29747	54.7448	1.37242e-13	2.90074e-13	1.24616e-09	6.56704e-10	1	1	seq_var	salt_up; uv_up
GRMZM2G099340_T01	GRMZM2G099340	3	17614009	17614990	85.7736	2288.52	26.681	4.73774	2043.6	0	0	0	0	1	1	seq_var	heat_up; salt_down; uv_down
GRMZM2G099474_T01	GRMZM2G099474	5	4312463	4317205	130.033	353.308	2.71706	1.44205	103.14	3.12343e-24	8.64657e-24	2.83607e-20	1.8119e-20	1	1	seq_var
GRMZM2G099729_T01	GRMZM2G099729	10	129485233	129487773	331.919	826.289	2.48943	1.31581	211.017	8.24277e-48	3.37898e-47	7.48443e-44	5.65948e-44	1	1	seq_var
GRMZM2G099802_T01	GRMZM2G099802	10	129482064	129485444	4.00139	1076.49	269.028	8.07161	1064.54	1.67994e-233	3.08782e-232	1.52538e-229	1.44256e-229	1	1	seq_var
GRMZM2G099860_T01	GRMZM2G099860	1	28446754	28451214	785.609	1771.07	2.25439	1.17274	379.841	1.3476e-84	8.70283e-84	1.22362e-80	1.03428e-80	1	1	seq_var
GRMZM2G099960_T01	GRMZM2G099960	3	32534481	32535195	230.744	739.128	3.20325	1.67953	266.484	6.62665e-60	3.17018e-59	6.01699e-56	4.75992e-56	1	1	seq_var
GRMZM2G100067_T01	GRMZM2G100067	6	134756753	134759881	7.8574	1331	169.394	7.40424	1307.61	2.50604e-286	5.94121e-285	2.27548e-282	2.17975e-282	1	1	seq_var
GRMZM2G100246_T01	GRMZM2G100246	5	15742835	15748507	76.5123	708.59	9.26113	3.21119	508.879	1.1121e-112	9.3672e-112	1.00978e-108	8.90011e-109	1	1	seq_var
GRMZM2G100828_T01	GRMZM2G100828	7	36524134	36525010	2.09441	118.54	56.5984	5.82269	112.402	2.91688e-26	8.42405e-26	2.64852e-22	1.73175e-22	1	1	seq_var
GRMZM2G102079_T01	GRMZM2G102079	7	6540482	6542475	619.705	1305.72	2.107	1.07519	244.422	4.27117e-55	1.93138e-54	3.87822e-51	3.021e-51	1	1	seq_var	salt_up
GRMZM2G102572_T01	GRMZM2G102572	3	3459135	3463008	523.502	2721.08	5.19785	2.37792	1488.44	0	0	0	0	1	1	seq_var
GRMZM2G102664_T01	GRMZM2G102664	3	13854604	13873787	63.5266	534.681	8.41665	3.07325	371.086	1.0858e-82	6.84655e-82	9.85903e-79	8.29657e-79	1	1	seq_var
GRMZM2G102860_T01	GRMZM2G102860	10	134016791	134017480	70.4755	378.023	5.36389	2.42328	210.894	8.76853e-48	3.59288e-47	7.96183e-44	6.0196e-44	1	1	seq_var	cold_on; salt_on
GRMZM2G102878_T02	GRMZM2G102878	2	192461730	192471119	43.612	242.763	5.56641	2.47675	138.493	5.68482e-32	1.80989e-31	5.16181e-28	3.54107e-28	1	1	seq_var
GRMZM2G102959_T01	GRMZM2G102959	5	209955746	209958660	380.02	1256.35	3.30602	1.7251	469.307	4.53449e-104	3.54636e-103	4.11732e-100	3.59132e-100	1	1	seq_var	heat_on; salt_on
GRMZM2G103013_T01	GRMZM2G103013	4	205984469	205985341	108.794	414.248	3.80764	1.9289	178.384	1.09206e-40	4.01618e-40	9.91594e-37	7.22072e-37	1	1	seq_var	cold_up; heat_off; uv_off
GRMZM2G103250_T01	GRMZM2G103250	10	70289697	70291509	801.443	2578.56	3.21739	1.68589	934.36	3.3311e-205	5.18805e-204	3.02464e-201	2.83077e-201	1	1	seq_var
GRMZM2G103281_T01	GRMZM2G103281	4	185354844	185359629	240.101	506.75	2.11057	1.07763	95.2016	1.71948e-22	4.58529e-22	1.56129e-18	9.75979e-19	1	1	seq_var
GRMZM2G103544_T02	GRMZM2G103544	3	197751467	197756996	374.663	1004.27	2.68047	1.42248	287.473	1.76653e-64	8.95097e-64	1.60401e-60	1.28763e-60	1	1	seq_var	cold_up
GRMZM2G103847_T01	GRMZM2G103847	10	113371073	113379732	309.283	909.41	2.94039	1.55601	295.524	3.11154e-66	1.60345e-65	2.82528e-62	2.27734e-62	1	1	seq_var
GRMZM2G103945_T03	GRMZM2G103945	6	133537405	133539720	760.477	2618.03	3.44262	1.78351	1021.31	4.18241e-224	7.28911e-223	3.79763e-220	3.58014e-220	1	1	seq_var	cold_up; heat_off; uv_on
GRMZM2G104288_T01	GRMZM2G104288	10	145534474	145539858	168.37	1041.69	6.18694	2.62922	630.292	4.31769e-139	4.36091e-138	3.92046e-135	3.53273e-135	1	1	seq_var
GRMZM2G104390_T01	GRMZM2G104390	8	40841370	40843380	699.606	2011.68	2.87545	1.52379	634.952	4.18598e-140	4.28992e-139	3.80087e-136	3.43041e-136	1	1	seq_var
GRMZM2G104419_T01	GRMZM2G104419	4	235260670	235267150	204.364	1215.57	5.94805	2.57242	720.13	1.25435e-158	1.47532e-157	1.13895e-154	1.04224e-154	1	1	seq_var
GRMZM2G104538_T03	GRMZM2G104538	2	2500582	2502357	97.2937	276.373	2.8406	1.5062	85.8232	1.96767e-20	5.01023e-20	1.78665e-16	1.08517e-16	1	1	seq_var	cold_up; uv_down
GRMZM2G104649_T04	GRMZM2G104649	10	107602600	107625127	674.039	1367.48	2.02878	1.02061	235.539	3.69334e-53	1.62715e-52	3.35355e-49	2.59272e-49	1	1	seq_var
GRMZM2G104760_T01	GRMZM2G104760	9	16186674	16189567	575.274	1249.98	2.17284	1.11958	249.405	3.49983e-56	1.60254e-55	3.17784e-52	2.48418e-52	1	1	seq_var	salt_up
GRMZM2G104918_T02	GRMZM2G104918	10	148434187	148437246	278.253	1896.3	6.81501	2.76872	1203.96	8.40875e-264	1.78809e-262	7.63514e-260	7.27693e-260	1	1	seq_var
GRMZM2G104942_T01	GRMZM2G104942	4	33149057	33152766	354.466	932.752	2.63143	1.39585	259.797	1.90016e-58	8.93034e-58	1.72534e-54	1.35842e-54	1	1	seq_var	cold_up; salt_down; uv_down
GRMZM2G105189_T01	GRMZM2G105189	1	246259616	246264186	155.232	439.387	2.83051	1.50106	135.791	2.21688e-31	6.99177e-31	2.01293e-27	1.37491e-27	1	1	seq_var
GRMZM2G105307_T01	GRMZM2G105307	3	183315355	183319702	167.306	654.432	3.91158	1.96775	288.767	9.22904e-65	4.68941e-64	8.37997e-61	6.73166e-61	1	1	seq_var
GRMZM2G105364_T01	GRMZM2G105364	9	32910946	32912670	5.67298	372.547	65.6703	6.03717	355.868	2.23533e-79	1.33972e-78	2.02968e-75	1.69125e-75	1	1	seq_var
GRMZM2G105750_T03	GRMZM2G105750	7	151985560	152001155	218.462	613.692	2.80915	1.49013	187.714	1.00299e-42	3.82173e-42	9.10718e-39	6.71805e-39	1	1	seq_var
GRMZM2G105770_T02	GRMZM2G105770	1	223992678	224006718	67.3657	225.464	3.34686	1.74281	85.3568	2.49099e-20	6.32675e-20	2.26181e-16	1.37154e-16	1	1	seq_var
GRMZM2G105791_T02	GRMZM2G105791	5	206900641	206905449	417.394	4383.19	10.5013	3.3925	3276.17	0	0	0	0	1	1	seq_var
GRMZM2G106165_T03	GRMZM2G106165	4	50748333	50752233	251.781	637.351	2.53137	1.33992	167.202	3.02249e-38	1.06787e-37	2.74442e-34	1.96795e-34	1	1	seq_var
GRMZM2G106427_T01	GRMZM2G106427	6	102563038	102576139	220.334	584.439	2.65251	1.40736	164.732	1.04665e-37	3.65663e-37	9.50358e-34	6.78438e-34	1	1	seq_var
GRMZM2G106795_T01	GRMZM2G106795	4	158633590	158636781	133.886	413.852	3.09107	1.62811	143.099	5.59231e-33	1.81351e-32	5.07782e-29	3.51253e-29	1	1	seq_var	salt_on
GRMZM2G107417_T01	GRMZM2G107417	3	187157672	187160243	111.321	509.412	4.57605	2.1941	255.305	1.81128e-57	8.43841e-57	1.64465e-53	1.29181e-53	1	1	seq_var
GRMZM2G107839_T01	GRMZM2G107839	3	231911306	231912399	572.749	1220.01	2.13009	1.09091	233.686	9.36637e-53	4.10061e-52	8.50467e-49	6.56302e-49	1	1	seq_var
GRMZM2G108527_T01	GRMZM2G108527	3	83703300	83704486	25.6468	649.034	25.3066	4.66144	575.993	2.79019e-127	2.66964e-126	2.53349e-123	2.26898e-123	1	1	seq_var	heat_on
GRMZM2G108643_T01	GRMZM2G108643	5	2811744	2814691	2631.75	8507.39	3.23259	1.69269	3099.26	0	0	0	0	1	1	seq_var
GRMZM2G108677_T01	GRMZM2G108677	5	2804104	2808171	62.4852	1152.35	18.4419	4.20492	977.746	1.23434e-214	2.03409e-213	1.12078e-210	1.05289e-210	1	1	seq_var
GRMZM2G108767_T02	GRMZM2G108767	7	165719833	165723658	663.239	1467.31	2.21234	1.14557	303.455	5.82076e-68	3.06569e-67	5.28525e-64	4.28233e-64	1	1	seq_var
GRMZM2G109221_T01	GRMZM2G109221	1	63011468	63035768	812.861	2231.55	2.7453	1.45696	661.105	8.59002e-146	9.16538e-145	7.79974e-142	7.06958e-142	1	1	seq_var
GRMZM2G109472_T03	GRMZM2G109472	8	157653408	157663852	228.544	1285.84	5.62623	2.49217	738.175	1.49505e-162	1.81242e-161	1.3575e-158	1.24567e-158	1	1	seq_var
GRMZM2G109720_T01	GRMZM2G109720	9	13496885	13502062	236.948	663.713	2.80109	1.48599	202.216	6.85896e-46	2.74479e-45	6.22793e-42	4.67232e-42	1	1	seq_var
GRMZM2G110116_T02	GRMZM2G110116	9	154910678	154913311	316.3	1622.81	5.13061	2.35913	880.287	1.89294e-193	2.72392e-192	1.71879e-189	1.59954e-189	1	1	seq_var
GRMZM2G111355_T02	GRMZM2G111355	7	135997436	136022100	279.591	573.17	2.05003	1.03565	101.07	8.87813e-24	2.4384e-23	8.06135e-20	5.12712e-20	1	1	seq_var
GRMZM2G111390_T01	GRMZM2G111390	5	68889341	68897026	382.908	797.225	2.08203	1.05799	145.457	1.70625e-33	5.58297e-33	1.54927e-29	1.07596e-29	1	1	seq_var
GRMZM2G111642_T02	GRMZM2G111642	1	290666783	290672751	2271.03	4958.8	2.18351	1.12665	999.213	2.66258e-219	4.55296e-218	2.41762e-215	2.27651e-215	1	1	seq_var
GRMZM2G111898_T01	GRMZM2G111898	8	11937591	11938625	193.647	505.455	2.61019	1.38416	139.071	4.25041e-32	1.35702e-31	3.85937e-28	2.65098e-28	1	1	seq_var
GRMZM2G111954_T01	GRMZM2G111954	2	30989046	30995045	548.354	2076.74	3.78722	1.92114	889.857	1.57311e-195	2.30757e-194	1.42838e-191	1.33117e-191	1	1	seq_var
GRMZM2G112149_T01	GRMZM2G112149	5	15563571	15569803	211.858	640.509	3.0233	1.59612	215.567	8.38356e-49	3.4791e-48	7.61227e-45	5.77879e-45	1	1	seq_var
GRMZM2G112366_T01	GRMZM2G112366	5	15560579	15561937	82.528	283.933	3.44044	1.78259	110.691	6.91521e-26	1.98139e-25	6.27901e-22	4.08827e-22	1	1	seq_var
GRMZM2G112598_T01	GRMZM2G112598	3	29620546	29623590	7.33456	649.185	88.5104	6.46777	627.509	1.73998e-138	1.74768e-137	1.5799e-134	1.42278e-134	1	1	seq_var	heat_up; salt_up; uv_off
GRMZM2G113771_T01	GRMZM2G113771	5	10982175	11001922	215.672	593.879	2.75362	1.46133	176.691	2.55782e-40	9.37628e-40	2.3225e-36	1.68919e-36	1	1	seq_var
GRMZM2G113888_T01	GRMZM2G113888	9	5004014	5006205	99.5514	1050.4	10.5514	3.39936	786.22	5.34586e-173	6.89494e-172	4.85404e-169	4.47823e-169	1	1	seq_var
GRMZM2G113928_T01	GRMZM2G113928	1	250618589	250623988	1004.56	3235.03	3.22034	1.68721	1173.46	3.5772e-257	7.34863e-256	3.24809e-253	3.09034e-253	1	1	seq_var
GRMZM2G114098_T01	GRMZM2G114098	9	21591970	21597213	437.27	1036.52	2.37043	1.24515	243.655	6.27635e-55	2.83388e-54	5.69893e-51	4.43738e-51	1	1	seq_var
GRMZM2G114182_T01	GRMZM2G114182	10	141754578	141761451	31.4867	68941.1	2189.53	11.0964	68846.7	0	0	0	0	1	1	seq_var
GRMZM2G114707_T01	GRMZM2G114707	1	92249493	92253250	173.119	653.11	3.77261	1.91556	278.847	1.33932e-62	6.6345e-62	1.2161e-58	9.7074e-59	1	1	seq_var
GRMZM2G114789_T01	GRMZM2G114789	5	10552445	10556342	243.526	519.694	2.13404	1.09359	99.9303	1.57854e-23	4.31071e-23	1.43331e-19	9.08605e-20	1	1	seq_var
GRMZM2G115198_T01	GRMZM2G115198	3	6162660	6168991	335.279	674.728	2.01244	1.00895	114.084	1.24881e-26	3.62622e-26	1.13392e-22	7.4354e-23	1	1	seq_var
GRMZM2G115280_T01	GRMZM2G115280	5	88253182	88286973	2.73225	310.341	113.584	6.82762	302.24	1.07114e-67	5.62193e-67	9.72593e-64	7.87393e-64	1	1	seq_var
GRMZM2G115480_T01	GRMZM2G115480	5	168942559	168951435	376.069	800.336	2.12816	1.08961	153.011	3.80981e-35	1.28028e-34	3.45931e-31	2.43028e-31	1	1	seq_var
GRMZM2G115658_T01	GRMZM2G115658	2	149292250	149296295	143.023	727.251	5.08486	2.34621	392.201	2.74595e-87	1.82527e-86	2.49332e-83	2.1185e-83	1	1	seq_var
GRMZM2G116635_T01	GRMZM2G116635	1	273940147	273941131	8.21361	301.783	36.7419	5.19935	278.013	2.03527e-62	1.00491e-61	1.84803e-58	1.47394e-58	1	1	seq_var
GRMZM2G116812_T01	GRMZM2G116812	2	144679977	144684087	9.00729	556.119	61.741	5.94816	529.671	3.32996e-117	2.92135e-116	3.0236e-113	2.67928e-113	1	1	seq_var
GRMZM2G116966_T01	GRMZM2G116966	9	2118350	2121095	10237.1	37949.9	3.7071	1.89029	15937.9	0	0	0	0	1	1	seq_var
GRMZM2G117030_T01	GRMZM2G117030	3	60531549	60535214	87.0324	192.027	2.20639	1.14169	39.5039	3.2741e-10	6.16909e-10	2.97288e-06	1.39542e-06	1	1	seq_var
GRMZM2G117166_T01	GRMZM2G117166	9	45924986	45927418	54.1152	119.099	2.20084	1.13805	24.3794	7.91105e-07	1.29708e-06	0.00718323	0.00280288	1	1	seq_var
GRMZM2G117412_T02	GRMZM2G117412	2	184661329	184663732	5981.33	20641.6	3.45101	1.78702	8072.87	0	0	0	0	1	1	seq_var
GRMZM2G117609_T01	GRMZM2G117609	4	16866227	16874819	718.688	1501.65	2.08943	1.06311	276.097	5.32271e-62	2.61527e-61	4.83302e-58	3.84991e-58	1	1	seq_var
GRMZM2G117642_T01	GRMZM2G117642	7	153136076	153138811	5.48104	906.71	165.427	7.37005	890.399	1.1995e-195	1.76237e-194	1.08915e-191	1.01514e-191	1	1	seq_var
GRMZM2G117993_T01	GRMZM2G117993	2	212900215	212905203	19.0905	751.584	39.3695	5.29901	696.204	2.0011e-153	2.25434e-152	1.817e-149	1.65591e-149	1	1	seq_var	cold_up
GRMZM2G118014_T01	GRMZM2G118014	1	297128063	297134060	95.886	271.28	2.82919	1.50039	83.7852	5.51556e-20	1.38768e-19	5.00813e-16	3.01811e-16	1	1	seq_var
GRMZM2G118515_T01	GRMZM2G118515	8	159216940	159224411	165.575	867.687	5.24044	2.38969	477.092	9.17425e-106	7.3008e-105	8.33022e-102	7.28435e-102	1	1	seq_var
GRMZM2G118644_T01	GRMZM2G118644	8	156853758	156856451	98.2064	455.466	4.63784	2.21345	230.523	4.58439e-52	1.98693e-51	4.16263e-48	3.20266e-48	1	1	seq_var
GRMZM2G118743_T01	GRMZM2G118743	1	145298496	145324235	275.094	1737.46	6.31588	2.65898	1062.59	4.4652e-233	8.19071e-232	4.0544e-229	3.83382e-229	1	1	seq_var
GRMZM2G119186_T01	GRMZM2G119186	5	2496042	2497691	22.594	987.951	43.7262	5.45043	922.189	1.47307e-202	2.2632e-201	1.33755e-198	1.25064e-198	1	1	seq_var
GRMZM2G119345_T01	GRMZM2G119345	8	10756078	10762016	273.29	1054.58	3.85882	1.94816	459.691	5.61244e-102	4.30413e-101	5.09609e-98	4.43214e-98	1	1	seq_var
GRMZM2G119482_T01	GRMZM2G119482	4	236150581	236167349	207.34	453.523	2.18734	1.12917	91.7072	1.00501e-21	2.63971e-21	9.12547e-18	5.65216e-18	1	1	seq_var
GRMZM2G119627_T01	GRMZM2G119627	9	141227222	141235818	476.113	976.779	2.05157	1.03673	172.529	2.07416e-39	7.49139e-39	1.88333e-35	1.3621e-35	1	1	seq_var
GRMZM2G119675_T01	GRMZM2G119675	2	214051718	214055324	359.332	3315.28	9.22621	3.20574	2377.83	0	0	0	0	1	1	seq_var
GRMZM2G119759_T04	GRMZM2G119759	2	899595	904557	160.458	429.546	2.677	1.42062	122.725	1.60185e-28	4.81458e-28	1.45448e-24	9.70724e-25	1	1	seq_var
GRMZM2G120484_T02	GRMZM2G120484	1	276876200	276877317	151.978	953.819	6.27602	2.64985	581.434	1.82832e-128	1.75303e-127	1.66012e-124	1.48716e-124	1	1	seq_var
GRMZM2G120587_T01	GRMZM2G120587	1	68140901	68144676	198.496	451.239	2.27329	1.18478	98.3157	3.56726e-23	9.66337e-23	3.23907e-19	2.04404e-19	1	1	seq_var
GRMZM2G120942_T01	GRMZM2G120942	7	119070595	119075721	10.7605	516.217	47.9733	5.58416	484.815	1.91478e-107	1.54406e-106	1.73862e-103	1.5232e-103	1	1	seq_var
GRMZM2G121264_T01	GRMZM2G121264	2	32550818	32553039	183.524	919.954	5.01273	2.3256	491.473	6.81088e-109	5.55142e-108	6.18428e-105	5.42623e-105	1	1	seq_var
GRMZM2G121510_T01	GRMZM2G121510	8	128823578	128826612	184.599	956.309	5.18046	2.37308	521.984	1.56642e-115	1.35587e-114	1.42231e-111	1.25815e-111	1	1	seq_var
GRMZM2G121514_T01	GRMZM2G121514	6	147413665	147418505	157.467	931.788	5.91736	2.56495	550.443	1.00824e-121	9.22862e-121	9.15479e-118	8.15563e-118	1	1	seq_var
GRMZM2G122148_T03	GRMZM2G122148	1	295140739	295143421	184.252	389.981	2.11656	1.08172	73.7056	9.06798e-18	2.16108e-17	8.23372e-14	4.77973e-14	1	1	seq_var
GRMZM2G122584_T01	GRMZM2G122584	3	209159595	209160447	993.716	2718.73	2.73592	1.45203	801.539	2.49672e-176	3.26661e-175	2.26703e-172	2.094e-172	1	1	seq_var
GRMZM2G122750_T01	GRMZM2G122750	6	164671161	164681928	1.29201	2130.18	1648.73	10.6871	2126.3	0	0	0	0	1	1	seq_var
GRMZM2G122892_T02	GRMZM2G122892	6	114661140	114664808	255.412	1110.98	4.34976	2.12093	535.714	1.61354e-118	1.44629e-117	1.4651e-114	1.30181e-114	1	1	seq_var
GRMZM2G123371_T01	GRMZM2G123371	5	202621246	202628418	23.3575	281.825	12.0657	3.59284	218.903	1.56896e-49	6.57717e-49	1.42461e-45	1.08494e-45	1	1	seq_var
GRMZM2G123410_T01	GRMZM2G123410	10	81194843	81197151	262.207	699.009	2.66587	1.41461	198.495	4.44993e-45	1.76366e-44	4.04054e-41	3.0215e-41	1	1	seq_var
GRMZM2G124175_T01	GRMZM2G124175	5	4601729	4604073	135.595	299.994	2.21243	1.14563	62.047	3.35353e-15	7.45412e-15	3.04501e-11	1.67543e-11	1	1	seq_var	uv_up
GRMZM2G124441_T01	GRMZM2G124441	5	2925353	2928771	1423.77	3027.9	2.12668	1.0886	578.038	1.00174e-127	9.59472e-127	9.09579e-124	8.14715e-124	1	1	seq_var
GRMZM2G125054_T01	GRMZM2G125054	6	121680193	121689217	869.196	2335.42	2.68687	1.42593	670.848	6.53365e-148	7.07098e-147	5.93255e-144	5.38503e-144	1	1	seq_var
GRMZM2G125352_T01	GRMZM2G125352	2	140942228	140947086	25.2015	322.379	12.792	3.67717	254.083	3.34418e-57	1.55082e-56	3.03651e-53	2.38206e-53	1	1	seq_var
GRMZM2G125432_T02	GRMZM2G125432	5	201650009	201664575	286.997	765.12	2.66595	1.41465	217.278	3.54939e-49	1.4804e-48	3.22284e-45	2.4505e-45	1	1	seq_var
GRMZM2G125455_T01	GRMZM2G125455	4	166030471	166034858	97.1239	226.498	2.33205	1.2216	51.7197	6.40172e-13	1.32379e-12	5.81277e-09	3.00241e-09	1	1	seq_var
GRMZM2G125571_T01	GRMZM2G125571	3	219145194	219146419	36.5305	1302.44	35.6535	5.15597	1196.83	2.97633e-262	6.25581e-261	2.70251e-258	2.57423e-258	1	1	seq_var	cold_up; heat_up; uv_off
GRMZM2G125812_T01	GRMZM2G125812	5	1585965	1592221	24.9126	237.382	9.52861	3.25227	172.109	2.56158e-39	9.22616e-39	2.32591e-35	1.6804e-35	1	1	seq_var
GRMZM2G125838_T01	GRMZM2G125838	4	173401199	173403388	186.432	409.466	2.19633	1.13509	83.4773	6.4451e-20	1.6193e-19	5.85215e-16	3.52354e-16	1	1	seq_var
GRMZM2G126010_T01	GRMZM2G126010	8	99906105	99909909	1252.74	2642.74	2.10956	1.07694	495.983	7.11176e-110	5.85447e-109	6.45748e-106	5.67376e-106	1	1	seq_var	salt_up
GRMZM2G126235_T01	GRMZM2G126235	8	150313053	150321213	136.268	1379.44	10.123	3.33956	1019.64	9.68405e-224	1.6845e-222	8.79311e-220	8.28857e-220	1	1	seq_var
GRMZM2G126586_T01	GRMZM2G126586	10	105053119	105055098	84.9365	380.918	4.48473	2.16502	188.052	8.46274e-43	3.23272e-42	7.68417e-39	5.67342e-39	1	1	seq_var
GRMZM2G126691_T01	GRMZM2G126691	8	152424788	152430790	611.429	2046.89	3.34772	1.74318	775.133	1.37629e-170	1.7527e-169	1.24968e-166	1.15168e-166	1	1	seq_var
GRMZM2G126795_T02	GRMZM2G126795	4	177676332	177683190	520	1161.84	2.2343	1.15983	244.944	3.28638e-55	1.48978e-54	2.98403e-51	2.3261e-51	1	1	seq_var
GRMZM2G126812_T01	GRMZM2G126812	9	151953285	151958133	218.9	1053.37	4.81212	2.26667	547.325	4.80823e-121	4.38781e-120	4.36587e-117	3.88794e-117	1	1	seq_var
GRMZM2G127117_T02	GRMZM2G127117	3	176607740	176610322	380.436	918.901	2.41539	1.27226	223.148	1.8608e-50	7.87695e-50	1.68961e-46	1.29065e-46	1	1	seq_var
GRMZM2G127139_T01	GRMZM2G127139	2	45068944	45077882	2964.15	10086.7	3.40288	1.76676	3887.12	0	0	0	0	1	1	seq_var	salt_up; uv_down
GRMZM2G127537_T01	GRMZM2G127537	7	123539134	123541042	116.459	307.663	2.64182	1.40153	86.1996	1.62663e-20	4.15466e-20	1.47698e-16	8.98877e-17	1	1	seq_var	salt_up; uv_off
GRMZM2G128072_T01	GRMZM2G128072	2	211409282	211411066	1289.2	6678.33	5.18021	2.37301	3645.13	0	0	0	0	1	1	seq_var
GRMZM2G128074_T01	GRMZM2G128074	10	139403539	139407380	63.2281	1209.93	19.136	4.25822	1032.81	1.32607e-226	2.3563e-225	1.20407e-222	1.13644e-222	1	1	seq_var
GRMZM2G128114_T01	GRMZM2G128114	5	86223079	86259405	248.234	1571.61	6.33115	2.66247	962.345	2.74996e-211	4.42724e-210	2.49696e-207	2.34214e-207	1	1	seq_var
GRMZM2G128434_T01	GRMZM2G128434	7	83065175	83073766	354.518	3314.15	9.34832	3.22471	2387.63	0	0	0	0	1	1	seq_var	cold_off; salt_up; uv_off
GRMZM2G128832_T01	GRMZM2G128832	7	33184317	33184961	21.0516	526.542	25.012	4.64455	466.625	1.73871e-103	1.35398e-102	1.57874e-99	1.37619e-99	1	1	seq_var
GRMZM2G129150_T01	GRMZM2G129150	5	13731852	13734143	31.1057	714.711	22.9769	4.52211	626.584	2.7661e-138	2.77527e-137	2.51162e-134	2.26156e-134	1	1	seq_var
GRMZM2G129482_T01	GRMZM2G129482	3	13925869	13927721	74.9919	6061.21	80.8249	6.33673	5839.9	0	0	0	0	1	1	seq_var
GRMZM2G129575_T01	GRMZM2G129575	2	208887428	208891800	199.092	614.318	3.0856	1.62555	211.963	5.1237e-48	2.10322e-47	4.65232e-44	3.51947e-44	1	1	seq_var
GRMZM2G130076_T01	GRMZM2G130076	5	18239498	18239812	14.8223	287.564	19.4007	4.27804	246.003	1.93106e-55	8.77138e-55	1.7534e-51	1.36757e-51	1	1	seq_var
GRMZM2G130305_T01	GRMZM2G130305	3	220722780	220725673	371.2	1261.31	3.39792	1.76465	485.322	1.48506e-107	1.19861e-106	1.34843e-103	1.18151e-103	1	1	seq_var
GRMZM2G130332_T01	GRMZM2G130332	1	150679023	150692114	1117.11	3680.41	3.29458	1.7201	1369.57	8.63093e-300	2.17691e-298	7.83689e-296	7.52704e-296	1	1	seq_var
GRMZM2G131202_T01	GRMZM2G131202	2	51853125	51854807	123.368	439.158	3.55974	1.83177	177.278	1.90489e-40	6.99129e-40	1.72964e-36	1.25856e-36	1	1	seq_var
GRMZM2G131473_T01	GRMZM2G131473	4	36441320	36445344	1524.19	4988.52	3.2729	1.71057	1842.8	0	0	0	0	1	1	seq_var
GRMZM2G131708_T01	GRMZM2G131708	8	154186072	154190129	996.08	3480.61	3.49431	1.80501	1378.9	8.08568e-302	2.0623e-300	7.3418e-298	7.05476e-298	1	1	seq_var
GRMZM2G131733_T01	GRMZM2G131733	6	150015193	150017595	30.9693	567.694	18.3309	4.1962	481.194	1.17446e-106	9.404e-106	1.06641e-102	9.33347e-103	1	1	seq_var
GRMZM2G131943_T01	GRMZM2G131943	4	27777802	27782060	44.3087	299.684	6.76355	2.75778	189.587	3.91299e-43	1.50042e-42	3.55299e-39	2.62679e-39	1	1	seq_var
GRMZM2G132019_T01	GRMZM2G132019	1	7290520	7294785	508.331	2392.14	4.70587	2.23446	1223.5	4.7561e-268	1.04565e-266	4.31854e-264	4.12259e-264	1	1	seq_var
GRMZM2G132121_T01	GRMZM2G132121	5	7529197	7531742	197.793	468.751	2.36991	1.24483	110.148	9.09344e-26	2.59813e-25	8.25685e-22	5.36786e-22	1	1	seq_var
GRMZM2G132238_T01	GRMZM2G132238	9	120619906	120621341	607.026	13652.7	22.4912	4.49129	11935	0	0	0	0	1	1	seq_var
GRMZM2G132671_T01	GRMZM2G132671	5	129448655	129454097	36.8204	137.871	3.74442	1.90474	58.4529	2.08212e-14	4.51963e-14	1.89056e-10	1.01982e-10	1	1	seq_var
GRMZM2G132748_T01	GRMZM2G132748	1	187660052	187660708	185.107	432.323	2.33553	1.22375	98.9841	2.54543e-23	6.92199e-23	2.31125e-19	1.46159e-19	1	1	seq_var
GRMZM2G132875_T03	GRMZM2G132875	10	120514510	120516184	10.1414	603.647	59.5229	5.89537	573.893	7.9897e-127	7.58854e-126	7.25465e-123	6.49163e-123	1	1	seq_var	salt_on
GRMZM2G133558_T01	GRMZM2G133558	6	80302681	80304766	132.869	336.859	2.53527	1.34214	88.5874	4.86381e-21	1.25678e-20	4.41634e-17	2.70768e-17	1	1	seq_var	cold_up
GRMZM2G133844_T01	GRMZM2G133844	8	156915137	156916424	4748.37	13647.4	2.87412	1.52312	4304.93	0	0	0	0	1	1	seq_var
GRMZM2G134045_T02	GRMZM2G134045	9	112127022	112137834	318.997	1140.31	3.57469	1.83782	462.247	1.55926e-102	1.20392e-101	1.41581e-98	1.23259e-98	1	1	seq_var
GRMZM2G134062_T01	GRMZM2G134062	6	63916579	63921377	322.968	1905.34	5.89947	2.56058	1123.68	2.35821e-246	4.57534e-245	2.14126e-242	2.03113e-242	1	1	seq_var
GRMZM2G134176_T01	GRMZM2G134176	8	159939841	159944716	372.603	841.985	2.25974	1.17615	181.394	2.40456e-41	8.95545e-41	2.18334e-37	1.59735e-37	1	1	seq_var
GRMZM2G134389_T01	GRMZM2G134389	6	109455098	109459707	2518.46	7434.55	2.95203	1.56171	2428.21	0	0	0	0	1	1	seq_var
GRMZM2G134708_T01	GRMZM2G134708	4	53106013	53110676	215.815	445.604	2.06475	1.04597	79.833	4.07426e-19	1.00201e-18	3.69942e-15	2.19562e-15	1	1	seq_var	cold_up; salt_up; uv_up
GRMZM2G134806_T01	GRMZM2G134806	4	241794528	241799858	611.107	1331.8	2.17933	1.12388	267.333	4.32671e-60	2.07755e-59	3.92865e-56	3.1109e-56	1	1	seq_var	heat_up; salt_up
GRMZM2G135091_T01	GRMZM2G135091	4	143105617	143107036	27.9065	374.848	13.4323	3.74763	298.863	5.82711e-67	3.03907e-66	5.29102e-63	4.2771e-63	1	1	seq_var	cold_up; uv_down
GRMZM2G135111_T01	GRMZM2G135111	2	200243145	200243573	207.593	445.231	2.14473	1.1008	86.5042	1.39439e-20	3.5675e-20	1.26611e-16	7.71376e-17	1	1	seq_var
GRMZM2G135770_T01	GRMZM2G135770	4	81813738	81819034	243.077	1176.48	4.83996	2.27499	613.743	1.7168e-135	1.6944e-134	1.55885e-131	1.40108e-131	1	1	seq_var
GRMZM2G136453_T01	GRMZM2G136453	1	195364024	195371310	765.667	2052.32	2.68044	1.42247	587.469	8.90042e-130	8.61576e-129	8.08158e-126	7.24761e-126	1	1	seq_var	salt_up
GRMZM2G136455_T02	GRMZM2G136455	6	42888434	42892811	115.289	473.082	4.10346	2.03684	217.578	3.05346e-49	1.27532e-48	2.77254e-45	2.10902e-45	1	1	seq_var
GRMZM2G136495_T01	GRMZM2G136495	9	121838115	121841737	250.261	2911.73	11.6348	3.54037	2240.18	0	0	0	0	1	1	seq_var	salt_up
GRMZM2G136872_T01	GRMZM2G136872	7	164120227	164125274	42.88	522.616	12.1879	3.60737	406.982	1.66367e-90	1.14788e-89	1.51061e-86	1.29184e-86	1	1	seq_var
GRMZM2G137161_T01	GRMZM2G137161	2	42628940	42631697	13.2027	489.384	37.0669	5.21206	451.163	4.02676e-100	3.04185e-99	3.6563e-96	3.17268e-96	1	1	seq_var	salt_on
GRMZM2G137715_T03	GRMZM2G137715	10	51010484	51019069	587.098	1230.26	2.09549	1.06729	227.615	1.97469e-51	8.48567e-51	1.79302e-47	1.37597e-47	1	1	seq_var
GRMZM2G138349_T01	GRMZM2G138349	5	118709375	118712471	445.423	1027.63	2.30708	1.20607	230.109	5.64513e-52	2.44434e-51	5.12578e-48	3.94256e-48	1	1	seq_var
GRMZM2G138429_T04	GRMZM2G138429	9	113542235	113545322	260.195	613.337	2.35723	1.23709	142.765	6.61644e-33	2.1395e-32	6.00773e-29	4.15049e-29	1	1	seq_var
GRMZM2G139512_T01	GRMZM2G139512	10	106451590	106454287	110.251	398.634	3.61568	1.85427	163.425	2.02055e-37	7.02397e-37	1.83466e-33	1.30709e-33	1	1	seq_var	heat_up; salt_up
GRMZM2G139786_T01	GRMZM2G139786	3	127533189	127534038	360.991	1143.23	3.16693	1.66308	406.789	1.83274e-90	1.26262e-89	1.66413e-86	1.42276e-86	1	1	seq_var
GRMZM2G140107_T01	GRMZM2G140107	3	161295516	161301138	75.5661	1275.53	16.8797	4.07721	1065.74	9.24334e-234	1.70243e-232	8.39296e-230	7.93818e-230	1	1	seq_var
GRMZM2G140160_T02	GRMZM2G140160	2	184056159	184064871	180.809	512.084	2.83218	1.50191	158.384	2.55179e-36	8.71717e-36	2.31702e-32	1.63901e-32	1	1	seq_var
GRMZM2G140298_T01	GRMZM2G140298	1	91347400	91353572	4.67705	407.298	87.0844	6.44434	393.479	1.44699e-87	9.67499e-87	1.31386e-83	1.11751e-83	1	1	seq_var
GRMZM2G140577_T01	GRMZM2G140577	8	119356309	119359897	908.019	2056.4	2.26472	1.17933	444.872	9.42122e-99	7.03492e-98	8.55447e-95	7.40979e-95	1	1	seq_var
GRMZM2G140867_T02	GRMZM2G140867	6	57554364	57557498	930.518	1907.37	2.0498	1.03548	336.253	4.17807e-75	2.40107e-74	3.79369e-71	3.13397e-71	1	1	seq_var
GRMZM2G140909_T01	GRMZM2G140909	7	126864350	126866304	197.929	492.977	2.49068	1.31654	126	3.07554e-29	9.34916e-29	2.79259e-25	1.87424e-25	1	1	seq_var
GRMZM2G140924_T01	GRMZM2G140924	10	140501796	140505133	1520.75	3830.07	2.51855	1.33259	996.664	9.53446e-219	1.62731e-217	8.65729e-215	8.15101e-215	1	1	seq_var
GRMZM2G141136_T01	GRMZM2G141136	10	72620825	72623231	86.3434	344.623	3.99131	1.99686	154.788	1.5577e-35	5.27758e-35	1.41439e-31	9.97083e-32	1	1	seq_var	cold_off; salt_up
GRMZM2G141665_T02	GRMZM2G141665	3	7136742	7138326	881.166	2157.84	2.44885	1.2921	536.325	1.18805e-118	1.06701e-117	1.07875e-114	9.58757e-115	1	1	seq_var	salt_up; uv_down
GRMZM2G142409_T03	GRMZM2G142409	6	122127246	122129125	221.764	606.839	2.73642	1.45229	178.955	8.19629e-41	3.02284e-40	7.44223e-37	5.42512e-37	1	1	seq_var	heat_up; salt_up
GRMZM2G142640_T02	GRMZM2G142640	8	118899510	118903214	11.0059	2799.68	254.38	7.99084	2766.83	0	0	0	0	1	1	seq_var
GRMZM2G142661_T01	GRMZM2G142661	4	171405281	171409735	153.741	521.019	3.38894	1.76083	199.913	2.18207e-45	8.6824e-45	1.98132e-41	1.48359e-41	1	1	seq_var
GRMZM2G142820_T01	GRMZM2G142820	10	147868880	147872116	429.793	1440.37	3.35131	1.74472	546.082	8.95851e-121	8.15063e-120	8.13433e-117	7.24117e-117	1	1	seq_var
GRMZM2G143373_T01	GRMZM2G143373	4	17354914	17361881	29.9092	348.068	11.6375	3.54071	267.807	3.41113e-60	1.64139e-59	3.0973e-56	2.45397e-56	1	1	seq_var
GRMZM2G143402_T02	GRMZM2G143402	10	145369328	145373351	1172.82	3142.06	2.67907	1.42173	898.729	1.85423e-197	2.76459e-196	1.68364e-193	1.5709e-193	1	1	seq_var
GRMZM2G143703_T01	GRMZM2G143703	1	80173133	80176373	60.0634	215.258	3.58385	1.84151	87.481	8.50946e-21	2.18636e-20	7.72659e-17	4.7202e-17	1	1	seq_var
GRMZM2G144346_T01	GRMZM2G144346	1	267460450	267462897	2721.56	6245.51	2.29483	1.19839	1384.87	4.06798e-303	1.04342e-301	3.69372e-299	3.55012e-299	1	1	seq_var
GRMZM2G144362_T04	GRMZM2G144362	6	98456656	98460323	263.996	1147.71	4.34745	2.12017	553.195	2.54033e-122	2.33937e-121	2.30662e-118	2.05639e-118	1	1	seq_var
GRMZM2G144653_T02	GRMZM2G144653	7	13181810	13184354	2283.99	5725.11	2.50663	1.32575	1478.48	0	0	0	0	1	1	seq_var	heat_up
GRMZM2G144716_T06	GRMZM2G144716	8	155508906	155513180	248.222	668.295	2.69233	1.42885	192.534	8.89481e-44	3.44119e-43	8.07648e-40	5.98976e-40	1	1	seq_var
GRMZM2G144782_T01	GRMZM2G144782	1	235547071	235550744	477.349	2470.22	5.17488	2.37153	1347.4	5.66597e-295	1.39802e-293	5.1447e-291	4.93676e-291	1	1	seq_var	cold_up
GRMZM2G144982_T01	GRMZM2G144982	1	205143885	205147578	327.557	967.415	2.95342	1.56239	316.16	9.93912e-71	5.43004e-70	9.02472e-67	7.37383e-67	1	1	seq_var
GRMZM2G144985_T02	GRMZM2G144985	9	142546143	142551127	722.923	1896.35	2.62316	1.39131	525.689	2.44754e-116	2.13279e-115	2.22237e-112	1.96758e-112	1	1	seq_var
[truncated: 37,470 more rows]
