# Supplementary material for: Allele specific expression analysis identifies regulatory variation associated with stress-related genes in the Mexican highland maize landrace Palomero Toluqueño
Source: PeerJ. 2017 Aug 23;5:e3737. doi: 10.7717/peerj.3737 (PMC5572453; doi:10.7717/peerj.3737)
Supplement: Supplemental Information S3 [file peerj-05-3737-s003.xlsx]

## Sheet: GO_BP
Supplementary Data 3. GO biological process categories associated with the 2386 ASE genes. Only categories represented by 10 or more genes were kept.
go_id	go_desc	go_namespace	num_loci	median_lfc	loci
GO:0016567	protein ubiquitination	P	12	-2.07735	GRMZM2G020196|GRMZM2G021299|GRMZM2G021822|GRMZM2G028183|GRMZM2G039725|GRMZM2G062499|GRMZM2G100913|GRMZM2G124915|GRMZM2G132671|GRMZM2G140160|GRMZM2G143644|GRMZM2G309063
GO:0009733	response to auxin	P	17	-1.87663	GRMZM2G043191|GRMZM2G045330|GRMZM2G073077|GRMZM2G079957|GRMZM2G080775|GRMZM2G102421|GRMZM2G102601|GRMZM2G136857|GRMZM2G159285|GRMZM2G162525|GRMZM2G177974|GRMZM2G361993|GRMZM2G391596|GRMZM2G414727|GRMZM2G429254|GRMZM2G475683|GRMZM5G833032
GO:0006351	transcription, DNA-templated	P	45	-1.62791	AC196475.3_FG005|GRMZM2G003715|GRMZM2G019106|GRMZM2G020150|GRMZM2G023625|GRMZM2G023667|GRMZM2G034326|GRMZM2G038374|GRMZM2G041127|GRMZM2G046061|GRMZM2G054252|GRMZM2G055204|GRMZM2G068973|GRMZM2G076602|GRMZM2G079200|GRMZM2G079470|GRMZM2G079957|GRMZM2G081406|GRMZM2G085254|GRMZM2G103896|GRMZM2G110116|GRMZM2G113928|GRMZM2G114850|GRMZM2G120971|GRMZM2G122330|GRMZM2G122750|GRMZM2G127379|GRMZM2G127537|GRMZ…
GO:0045893	positive regulation of transcription, DNA-templated	P	12	-1.613	AC188023.3_FG005|GRMZM2G037378|GRMZM2G048472|GRMZM2G091419|GRMZM2G113340|GRMZM2G141707|GRMZM2G148106|GRMZM2G162672|GRMZM2G339563|GRMZM2G359127|GRMZM2G478709|GRMZM2G488458
GO:0006413	translational initiation	P	10	-1.59598	GRMZM2G002616|GRMZM2G007038|GRMZM2G022052|GRMZM2G056462|GRMZM2G064390|GRMZM2G084062|GRMZM2G104649|GRMZM2G120942|GRMZM2G139614|GRMZM2G379758
GO:0006812	cation transport	P	12	-1.58873	GRMZM2G000219|GRMZM2G037342|GRMZM2G065839|GRMZM2G067747|GRMZM2G067853|GRMZM2G068259|GRMZM2G095611|GRMZM2G102786|GRMZM2G104325|GRMZM2G398288|GRMZM2G455171|GRMZM5G894029
GO:0009902	chloroplast relocation	P	11	-1.55238	GRMZM2G007038|GRMZM2G032266|GRMZM2G077258|GRMZM2G090271|GRMZM2G139123|GRMZM2G148106|GRMZM2G162672|GRMZM2G166877|GRMZM2G329040|GRMZM2G418752|GRMZM2G488458
GO:0016310	phosphorylation	P	59	-1.45189	GRMZM2G001668|GRMZM2G007283|GRMZM2G007848|GRMZM2G017164|GRMZM2G019267|GRMZM2G022054|GRMZM2G024151|GRMZM2G025459|GRMZM2G028709|GRMZM2G029407|GRMZM2G034052|GRMZM2G038791|GRMZM2G044038|GRMZM2G045330|GRMZM2G047588|GRMZM2G051677|GRMZM2G051984|GRMZM2G055678|GRMZM2G059151|GRMZM2G070218|GRMZM2G077278|GRMZM2G079913|GRMZM2G083016|GRMZM2G087201|GRMZM2G087459|GRMZM2G093316|GRMZM2G097457|GRMZM2G102601|GRMZM2G…
GO:0006364	rRNA processing	P	23	-1.44131	GRMZM2G001653|GRMZM2G059252|GRMZM2G061105|GRMZM2G063729|GRMZM2G068471|GRMZM2G077632|GRMZM2G090271|GRMZM2G113267|GRMZM2G114707|GRMZM2G117412|GRMZM2G139123|GRMZM2G141707|GRMZM2G148106|GRMZM2G162672|GRMZM2G163988|GRMZM2G164558|GRMZM2G168412|GRMZM2G173923|GRMZM2G336065|GRMZM2G359127|GRMZM2G399952|GRMZM2G458824|GRMZM2G488458
GO:0009409	response to cold	P	14	-1.27357	AC203173.3_FG004|GRMZM2G008623|GRMZM2G035417|GRMZM2G042683|GRMZM2G081268|GRMZM2G083253|GRMZM2G099984|GRMZM2G113033|GRMZM2G120579|GRMZM2G134628|GRMZM2G135283|GRMZM2G177974|GRMZM2G310569|GRMZM5G862101
GO:0009793	embryo development ending in seed dormancy	P	22	-1.24439	GRMZM2G001296|GRMZM2G003732|GRMZM2G004172|GRMZM2G021822|GRMZM2G028005|GRMZM2G028535|GRMZM2G033926|GRMZM2G059151|GRMZM2G077632|GRMZM2G093316|GRMZM2G107696|GRMZM2G113267|GRMZM2G116675|GRMZM2G129575|GRMZM2G134045|GRMZM2G162525|GRMZM2G329144|GRMZM2G339563|GRMZM2G402002|GRMZM2G418752|GRMZM2G473533|GRMZM2G474798
GO:0010207	photosystem II assembly	P	10	-1.23748	AC188023.3_FG005|GRMZM2G001653|GRMZM2G005984|GRMZM2G049547|GRMZM2G059252|GRMZM2G139123|GRMZM2G148106|GRMZM2G164558|GRMZM2G178775|GRMZM2G488458
GO:0006457	protein folding	P	23	-1.22269	AC215201.3_FG005|GRMZM2G023347|GRMZM2G028516|GRMZM2G034157|GRMZM2G039263|GRMZM2G046894|GRMZM2G049349|GRMZM2G058276|GRMZM2G068963|GRMZM2G069765|GRMZM2G070807|GRMZM2G076544|GRMZM2G091189|GRMZM2G095333|GRMZM2G117746|GRMZM2G125304|GRMZM2G132811|GRMZM2G153815|GRMZM2G331833|GRMZM2G479746|GRMZM2G488458|GRMZM5G856084|GRMZM5G868120
GO:0042742	defense response to bacterium	P	17	-1.22229	GRMZM2G028516|GRMZM2G037140|GRMZM2G038365|GRMZM2G041159|GRMZM2G046163|GRMZM2G046191|GRMZM2G059191|GRMZM2G066867|GRMZM2G068244|GRMZM2G098298|GRMZM2G102601|GRMZM2G120579|GRMZM2G135283|GRMZM2G149265|GRMZM2G155767|GRMZM2G169890|GRMZM2G472167
GO:0006633	fatty acid biosynthetic process	P	11	-1.21566	GRMZM2G003501|GRMZM2G015419|GRMZM2G022563|GRMZM2G062481|GRMZM2G070422|GRMZM2G099696|GRMZM2G102878|GRMZM2G140298|GRMZM2G175818|GRMZM5G836378|GRMZM5G850019
GO:0006662	glycerol ether metabolic process	P	14	-1.17454	GRMZM2G009928|GRMZM2G010491|GRMZM2G014055|GRMZM2G017419|GRMZM2G023711|GRMZM2G053023|GRMZM2G099474|GRMZM2G131202|GRMZM2G141707|GRMZM2G144653|GRMZM2G358009|GRMZM2G419836|GRMZM2G441144|GRMZM5G843368
GO:0007165	signal transduction	P	23	-1.17202	GRMZM2G003607|GRMZM2G012958|GRMZM2G026147|GRMZM2G044038|GRMZM2G052509|GRMZM2G053831|GRMZM2G069631|GRMZM2G071071|GRMZM2G081622|GRMZM2G102601|GRMZM2G136455|GRMZM2G149847|GRMZM2G155767|GRMZM2G165418|GRMZM2G170120|GRMZM2G171060|GRMZM2G177050|GRMZM2G177220|GRMZM2G181081|GRMZM2G340359|GRMZM2G354604|GRMZM2G369912|GRMZM5G881044
GO:0009737	response to abscisic acid	P	26	-1.15742	GRMZM2G003179|GRMZM2G016290|GRMZM2G024550|GRMZM2G028535|GRMZM2G042683|GRMZM2G043191|GRMZM2G066867|GRMZM2G068244|GRMZM2G071071|GRMZM2G081192|GRMZM2G102601|GRMZM2G127139|GRMZM2G134045|GRMZM2G134628|GRMZM2G140160|GRMZM2G149923|GRMZM2G158562|GRMZM2G181081|GRMZM2G310569|GRMZM2G310947|GRMZM2G326707|GRMZM2G472167|GRMZM2G478709|GRMZM5G833032|GRMZM5G846196|GRMZM5G862101
GO:0015031	protein transport	P	24	-1.15726	GRMZM2G011078|GRMZM2G012958|GRMZM2G019236|GRMZM2G029077|GRMZM2G041181|GRMZM2G042552|GRMZM2G052509|GRMZM2G054210|GRMZM2G071071|GRMZM2G073498|GRMZM2G081622|GRMZM2G088088|GRMZM2G107757|GRMZM2G117507|GRMZM2G136455|GRMZM2G149847|GRMZM2G171060|GRMZM2G177914|GRMZM2G354604|GRMZM2G381649|GRMZM2G395844|GRMZM2G431350|GRMZM2G431703|GRMZM5G844195
GO:0009651	response to salt stress	P	44	-1.14977	GRMZM2G007249|GRMZM2G024550|GRMZM2G028535|GRMZM2G037342|GRMZM2G061702|GRMZM2G066867|GRMZM2G068259|GRMZM2G068665|GRMZM2G071294|GRMZM2G086464|GRMZM2G098298|GRMZM2G098346|GRMZM2G102601|GRMZM2G104325|GRMZM2G110116|GRMZM2G112149|GRMZM2G117642|GRMZM2G120579|GRMZM2G126732|GRMZM2G132875|GRMZM2G137715|GRMZM2G140150|GRMZM2G148301|GRMZM2G149265|GRMZM2G149923|GRMZM2G151440|GRMZM2G152925|GRMZM2G154881|GRMZM2G…
GO:0006355	regulation of transcription, DNA-templated	P	68	-1.14537	AC196475.3_FG005|AC203535.4_FG002|GRMZM2G002075|GRMZM2G003715|GRMZM2G010357|GRMZM2G013391|GRMZM2G017429|GRMZM2G019106|GRMZM2G020150|GRMZM2G020920|GRMZM2G023625|GRMZM2G023667|GRMZM2G024550|GRMZM2G026147|GRMZM2G027209|GRMZM2G033093|GRMZM2G041127|GRMZM2G042250|GRMZM2G045236|GRMZM2G054252|GRMZM2G055204|GRMZM2G059851|GRMZM2G064466|GRMZM2G068973|GRMZM2G071907|GRMZM2G073892|GRMZM2G076602|GRMZM2G079200|G…
GO:0006412	translation	P	45	-1.14497	AC214640.3_FG003|AC225147.4_FG002|GRMZM2G002616|GRMZM2G013457|GRMZM2G019325|GRMZM2G022619|GRMZM2G024647|GRMZM2G026868|GRMZM2G030016|GRMZM2G030293|GRMZM2G030915|GRMZM2G032564|GRMZM2G032721|GRMZM2G044137|GRMZM2G047476|GRMZM2G054136|GRMZM2G060373|GRMZM2G066222|GRMZM2G083253|GRMZM2G084465|GRMZM2G102230|GRMZM2G108643|GRMZM2G123495|GRMZM2G132121|GRMZM2G138842|GRMZM2G140116|GRMZM2G145280|GRMZM2G148709|G…
GO:0032259	methylation	P	26	-1.14495	GRMZM2G000739|GRMZM2G002642|GRMZM2G039993|GRMZM2G050307|GRMZM2G063438|GRMZM2G065210|GRMZM2G077258|GRMZM2G077486|GRMZM2G085924|GRMZM2G089355|GRMZM2G099729|GRMZM2G116966|GRMZM2G119933|GRMZM2G122296|GRMZM2G128179|GRMZM2G130910|GRMZM2G131708|GRMZM2G135283|GRMZM2G136857|GRMZM2G140577|GRMZM2G150248|GRMZM2G157589|GRMZM2G179814|GRMZM2G405178|GRMZM2G423027|GRMZM5G876898
GO:0016117	carotenoid biosynthetic process	P	14	-1.14392	GRMZM2G033926|GRMZM2G095333|GRMZM2G113476|GRMZM2G144273|GRMZM2G162672|GRMZM2G166877|GRMZM2G312910|GRMZM2G329040|GRMZM2G410515|GRMZM2G419606|GRMZM2G458824|GRMZM5G835542|GRMZM5G837869|GRMZM5G876898
GO:0006468	protein phosphorylation	P	78	-1.14237	AC218998.2_FG007|GRMZM2G001668|GRMZM2G003662|GRMZM2G007283|GRMZM2G007848|GRMZM2G017164|GRMZM2G019267|GRMZM2G019317|GRMZM2G024151|GRMZM2G028709|GRMZM2G029407|GRMZM2G034052|GRMZM2G042380|GRMZM2G043069|GRMZM2G044038|GRMZM2G045330|GRMZM2G047546|GRMZM2G047588|GRMZM2G051984|GRMZM2G055678|GRMZM2G063792|GRMZM2G065214|GRMZM2G066867|GRMZM2G072584|GRMZM2G073399|GRMZM2G077278|GRMZM2G077914|GRMZM2G079913|GRMZ…
GO:0010027	thylakoid membrane organization	P	21	-1.13406	GRMZM2G007038|GRMZM2G032266|GRMZM2G033926|GRMZM2G049547|GRMZM2G050842|GRMZM2G059252|GRMZM2G074252|GRMZM2G077258|GRMZM2G077632|GRMZM2G090271|GRMZM2G093254|GRMZM2G139123|GRMZM2G145895|GRMZM2G148106|GRMZM2G162672|GRMZM2G166877|GRMZM2G329040|GRMZM2G339563|GRMZM2G418752|GRMZM2G488458|GRMZM5G826194
GO:0006511	ubiquitin-dependent protein catabolic process	P	17	-1.13132	GRMZM2G000623|GRMZM2G008623|GRMZM2G009655|GRMZM2G014805|GRMZM2G016511|GRMZM2G059282|GRMZM2G074282|GRMZM2G094705|GRMZM2G107696|GRMZM2G109725|GRMZM2G124915|GRMZM2G126447|GRMZM2G134176|GRMZM2G142825|GRMZM2G309063|GRMZM2G376074|GRMZM2G467356
GO:0045454	cell redox homeostasis	P	19	-1.12355	GRMZM2G009928|GRMZM2G010491|GRMZM2G014055|GRMZM2G017419|GRMZM2G023711|GRMZM2G053023|GRMZM2G087254|GRMZM2G099474|GRMZM2G131202|GRMZM2G134708|GRMZM2G141707|GRMZM2G144653|GRMZM2G318213|GRMZM2G337706|GRMZM2G358009|GRMZM2G419836|GRMZM2G441144|GRMZM2G469994|GRMZM5G843368
GO:0016192	vesicle-mediated transport	P	14	-1.11782	GRMZM2G008919|GRMZM2G011636|GRMZM2G029077|GRMZM2G054210|GRMZM2G057576|GRMZM2G062042|GRMZM2G077490|GRMZM2G104505|GRMZM2G111355|GRMZM2G177914|GRMZM2G178244|GRMZM2G474462|GRMZM5G846196|GRMZM5G894156
GO:0046686	response to cadmium ion	P	34	-1.10547	AC206968.3_FG003|GRMZM2G008623|GRMZM2G023232|GRMZM2G024104|GRMZM2G031107|GRMZM2G037140|GRMZM2G038848|GRMZM2G048616|GRMZM2G055936|GRMZM2G059151|GRMZM2G082185|GRMZM2G088064|GRMZM2G091155|GRMZM2G093347|GRMZM2G098346|GRMZM2G112149|GRMZM2G117642|GRMZM2G122479|GRMZM2G134806|GRMZM2G135283|GRMZM2G140150|GRMZM2G151440|GRMZM2G153569|GRMZM2G162486|GRMZM2G178254|GRMZM2G178517|GRMZM2G181568|GRMZM2G335618|GRMZ…
GO:0006979	response to oxidative stress	P	17	-1.06707	GRMZM2G010649|GRMZM2G019236|GRMZM2G028535|GRMZM2G037140|GRMZM2G047968|GRMZM2G053720|GRMZM2G079348|GRMZM2G083253|GRMZM2G093346|GRMZM2G149273|GRMZM2G151227|GRMZM2G169333|GRMZM2G329144|GRMZM2G335618|GRMZM2G450233|GRMZM2G577677|GRMZM5G833747
GO:0015995	chlorophyll biosynthetic process	P	10	-1.06693	GRMZM2G033926|GRMZM2G043453|GRMZM2G090271|GRMZM2G095333|GRMZM2G162672|GRMZM2G163988|GRMZM2G359127|GRMZM2G458824|GRMZM5G835542|GRMZM5G837869
GO:0009414	response to water deprivation	P	15	-1.05735	GRMZM2G028535|GRMZM2G066867|GRMZM2G081192|GRMZM2G121494|GRMZM2G127139|GRMZM2G134628|GRMZM2G136857|GRMZM2G149923|GRMZM2G155767|GRMZM2G158562|GRMZM2G159285|GRMZM2G310569|GRMZM2G332976|GRMZM2G392975|GRMZM5G862101
GO:0006886	intracellular protein transport	P	18	-1.05679	GRMZM2G019236|GRMZM2G029077|GRMZM2G052509|GRMZM2G054210|GRMZM2G057576|GRMZM2G062042|GRMZM2G076204|GRMZM2G077295|GRMZM2G077844|GRMZM2G111355|GRMZM2G136455|GRMZM2G149847|GRMZM2G177914|GRMZM2G354604|GRMZM2G395844|GRMZM2G431703|GRMZM2G474462|GRMZM5G894156
GO:0006810	transport	P	64	-1.05322	AC199782.5_FG001|AC205608.4_FG004|GRMZM2G000812|GRMZM2G005339|GRMZM2G006953|GRMZM2G008919|GRMZM2G011590|GRMZM2G011636|GRMZM2G014914|GRMZM2G018281|GRMZM2G019236|GRMZM2G020484|GRMZM2G028325|GRMZM2G032218|GRMZM2G035790|GRMZM2G037342|GRMZM2G047187|GRMZM2G051630|GRMZM2G060183|GRMZM2G064473|GRMZM2G067747|GRMZM2G072029|GRMZM2G081192|GRMZM2G081239|GRMZM2G082184|GRMZM2G088088|GRMZM2G095611|GRMZM2G097568|G…
GO:0006098	pentose-phosphate shunt	P	15	-1.03365	GRMZM2G001653|GRMZM2G002656|GRMZM2G005493|GRMZM2G031107|GRMZM2G032266|GRMZM2G051952|GRMZM2G117412|GRMZM2G139123|GRMZM2G162672|GRMZM2G166877|GRMZM2G178775|GRMZM2G359127|GRMZM2G426964|GRMZM2G440208|GRMZM2G458824
GO:0005975	carbohydrate metabolic process	P	41	-1.02927	AC148152.3_FG008|AC203753.4_FG006|GRMZM2G004435|GRMZM2G005493|GRMZM2G008247|GRMZM2G009626|GRMZM2G011662|GRMZM2G013255|GRMZM2G017186|GRMZM2G019619|GRMZM2G031107|GRMZM2G038281|GRMZM2G055699|GRMZM2G069024|GRMZM2G069676|GRMZM2G077015|GRMZM2G083812|GRMZM2G100828|GRMZM2G121514|GRMZM2G127117|GRMZM2G139300|GRMZM2G141289|GRMZM2G147849|GRMZM2G151468|GRMZM2G162359|GRMZM2G164676|GRMZM2G175218|GRMZM2G180716|G…
GO:0006508	proteolysis	P	50	-1.01314	AC198353.5_FG001|AC211737.3_FG012|AC233895.1_FG001|GRMZM2G000719|GRMZM2G004040|GRMZM2G008623|GRMZM2G016511|GRMZM2G017961|GRMZM2G032821|GRMZM2G046537|GRMZM2G049547|GRMZM2G054678|GRMZM2G059026|GRMZM2G065757|GRMZM2G066469|GRMZM2G070011|GRMZM2G073077|GRMZM2G074386|GRMZM2G083016|GRMZM2G090010|GRMZM2G098298|GRMZM2G103266|GRMZM2G105523|GRMZM2G106165|GRMZM2G107696|GRMZM2G108849|GRMZM2G120587|GRMZM2G12914…
GO:0009658	chloroplast organization	P	14	-0.0911952	AC215201.3_FG005|GRMZM2G007453|GRMZM2G024550|GRMZM2G049547|GRMZM2G051952|GRMZM2G077632|GRMZM2G113267|GRMZM2G141707|GRMZM2G148106|GRMZM2G162968|GRMZM2G173923|GRMZM2G353213|GRMZM2G399952|GRMZM5G876898
GO:0006281	DNA repair	P	12	-0.0876093	GRMZM2G011631|GRMZM2G016602|GRMZM2G035999|GRMZM2G043955|GRMZM2G069856|GRMZM2G114707|GRMZM2G126795|GRMZM2G169333|GRMZM2G173309|GRMZM2G175177|GRMZM2G422464|GRMZM5G844096
GO:0007264	small GTPase mediated signal transduction	P	12	0.00240812	GRMZM2G012958|GRMZM2G047476|GRMZM2G052509|GRMZM2G071071|GRMZM2G081622|GRMZM2G106795|GRMZM2G111355|GRMZM2G136455|GRMZM2G149847|GRMZM2G171060|GRMZM2G354604|GRMZM2G395844
GO:0055114	oxidation-reduction process	P	145	1.04597	AC210013.4_FG006|GRMZM2G000739|GRMZM2G002656|GRMZM2G007249|GRMZM2G009940|GRMZM2G010348|GRMZM2G010468|GRMZM2G012865|GRMZM2G015419|GRMZM2G018251|GRMZM2G020761|GRMZM2G021436|GRMZM2G025243|GRMZM2G025870|GRMZM2G028535|GRMZM2G031107|GRMZM2G032222|GRMZM2G032282|GRMZM2G032684|GRMZM2G034152|GRMZM2G035073|GRMZM2G038365|GRMZM2G038848|GRMZM2G039396|GRMZM2G042080|GRMZM2G047968|GRMZM2G048616|GRMZM2G053720|GRMZ…
GO:0008152	metabolic process	P	153	1.06311	AC148152.3_FG008|AC191575.2_FG001|AC197705.4_FG011|AC210013.4_FG006|GRMZM2G000739|GRMZM2G003501|GRMZM2G004435|GRMZM2G008247|GRMZM2G009125|GRMZM2G009626|GRMZM2G009940|GRMZM2G010987|GRMZM2G012546|GRMZM2G015908|GRMZM2G016605|GRMZM2G017186|GRMZM2G018251|GRMZM2G019746|GRMZM2G022242|GRMZM2G022563|GRMZM2G022782|GRMZM2G025243|GRMZM2G028535|GRMZM2G028709|GRMZM2G029845|GRMZM2G030097|GRMZM2G032684|GRMZM2G03…
GO:0019288	isopentenyl diphosphate biosynthetic process, methylerythritol 4-phosphate pathway	P	22	1.07834	GRMZM2G007038|GRMZM2G032266|GRMZM2G032821|GRMZM2G033926|GRMZM2G043453|GRMZM2G048472|GRMZM2G059252|GRMZM2G077258|GRMZM2G090271|GRMZM2G095333|GRMZM2G108643|GRMZM2G113267|GRMZM2G117412|GRMZM2G151440|GRMZM2G162672|GRMZM2G166877|GRMZM2G178775|GRMZM2G329040|GRMZM2G359127|GRMZM2G399952|GRMZM2G418752|GRMZM5G837869
GO:0006950	response to stress	P	20	1.1346	AC208204.3_FG006|GRMZM2G023232|GRMZM2G034157|GRMZM2G036427|GRMZM2G052100|GRMZM2G059851|GRMZM2G074097|GRMZM2G092129|GRMZM2G099003|GRMZM2G102167|GRMZM2G119482|GRMZM2G128114|GRMZM2G153815|GRMZM2G158232|GRMZM2G180620|GRMZM2G310410|GRMZM2G413897|GRMZM2G428391|GRMZM2G456835|GRMZM2G472248
GO:0006629	lipid metabolic process	P	21	1.14169	GRMZM2G007157|GRMZM2G022402|GRMZM2G045753|GRMZM2G058227|GRMZM2G060866|GRMZM2G065757|GRMZM2G071294|GRMZM2G087612|GRMZM2G097504|GRMZM2G099802|GRMZM2G102572|GRMZM2G105189|GRMZM2G117030|GRMZM2G148913|GRMZM2G153274|GRMZM2G352855|GRMZM2G414047|GRMZM2G416817|GRMZM2G461040|GRMZM2G479746|GRMZM5G862317
GO:0009408	response to heat	P	17	1.16154	GRMZM2G023232|GRMZM2G034157|GRMZM2G049349|GRMZM2G053898|GRMZM2G059851|GRMZM2G068665|GRMZM2G073077|GRMZM2G102601|GRMZM2G119482|GRMZM2G127139|GRMZM2G128114|GRMZM2G134628|GRMZM2G149265|GRMZM2G158232|GRMZM2G162968|GRMZM2G332976|GRMZM5G856084
GO:0019252	starch biosynthetic process	P	15	1.16573	GRMZM2G032266|GRMZM2G051677|GRMZM2G068506|GRMZM2G074252|GRMZM2G077258|GRMZM2G097457|GRMZM2G105791|GRMZM2G126988|GRMZM2G166877|GRMZM2G179146|GRMZM2G329040|GRMZM2G418752|GRMZM2G436986|GRMZM2G458824|GRMZM5G837869
GO:0015979	photosynthesis	P	23	1.19935	GRMZM2G005433|GRMZM2G007453|GRMZM2G009048|GRMZM2G027331|GRMZM2G033885|GRMZM2G038365|GRMZM2G038519|GRMZM2G043453|GRMZM2G059151|GRMZM2G090271|GRMZM2G097457|GRMZM2G113033|GRMZM2G117412|GRMZM2G123371|GRMZM2G131489|GRMZM2G134130|GRMZM2G166877|GRMZM2G312910|GRMZM2G380414|GRMZM2G436986|GRMZM2G455676|GRMZM2G471904|GRMZM5G856777
GO:0055085	transmembrane transport	P	56	1.35671	AC208897.3_FG004|GRMZM2G010765|GRMZM2G018281|GRMZM2G031938|GRMZM2G032218|GRMZM2G037342|GRMZM2G043075|GRMZM2G043983|GRMZM2G047187|GRMZM2G051630|GRMZM2G055025|GRMZM2G055216|GRMZM2G060183|GRMZM2G062024|GRMZM2G065839|GRMZM2G067747|GRMZM2G067789|GRMZM2G070563|GRMZM2G072029|GRMZM2G072632|GRMZM2G086430|GRMZM2G095611|GRMZM2G104942|GRMZM2G109221|GRMZM2G112598|GRMZM2G113203|GRMZM2G115658|GRMZM2G118515|GRMZ…
GO:0080167	response to karrikin	P	15	1.71386	GRMZM2G038281|GRMZM2G038365|GRMZM2G105364|GRMZM2G115658|GRMZM2G119186|GRMZM2G127080|GRMZM2G139300|GRMZM2G149216|GRMZM2G160560|GRMZM2G170128|GRMZM2G178079|GRMZM2G335618|GRMZM2G366065|GRMZM5G891282|GRMZM6G734131
GO:0009058	biosynthetic process	P	17	1.78975	GRMZM2G017671|GRMZM2G050325|GRMZM2G055467|GRMZM2G068506|GRMZM2G071294|GRMZM2G088064|GRMZM2G103281|GRMZM2G105791|GRMZM2G126988|GRMZM2G140107|GRMZM2G144985|GRMZM2G149265|GRMZM2G151227|GRMZM2G161337|GRMZM2G170595|GRMZM2G178254|GRMZM2G357734
