# Supplementary material for: Allele specific expression analysis identifies regulatory variation associated with stress-related genes in the Mexican highland maize landrace Palomero Toluqueño
Source: PeerJ. 2017 Aug 23;5:e3737. doi: 10.7717/peerj.3737 (PMC5572453; doi:10.7717/peerj.3737)
Supplement: Supplemental Information S4 [file peerj-05-3737-s004.xlsx]

## Sheet: GO_MF
Supplementary Data 4. GO molecular function categories associated with the 2386 ASE genes. Only categories represented by 10 or more genes were kept.
go_id	go_desc	go_namespace	num_loci	median_lfc	loci
GO:0004252	serine-type endopeptidase activity	F	10	-1.89112	AC211737.3_FG012|GRMZM2G017961|GRMZM2G046537|GRMZM2G059026|GRMZM2G103266|GRMZM2G145589|GRMZM2G148106|GRMZM5G803334|GRMZM5G809184|GRMZM5G857620
GO:0051082	unfolded protein binding	F	13	-1.8128	GRMZM2G023347|GRMZM2G028516|GRMZM2G031981|GRMZM2G034157|GRMZM2G038801|GRMZM2G039263|GRMZM2G058276|GRMZM2G069765|GRMZM2G113340|GRMZM2G125304|GRMZM2G153815|GRMZM2G331833|GRMZM5G856084
GO:0016706	oxidoreductase activity, acting on paired donors, with incorporation or reduction of molecular oxygen, 2-oxoglutarate as one donor, and incorporation of one atom each of oxygen into both donors	F	12	-1.6873	GRMZM2G007249|GRMZM2G025870|GRMZM2G060940|GRMZM2G072529|GRMZM2G114098|GRMZM2G126732|GRMZM2G147882|GRMZM2G363893|GRMZM2G466270|GRMZM2G542847|GRMZM2G703582|GRMZM5G844096
GO:0003743	translation initiation factor activity	F	10	-1.59598	GRMZM2G002616|GRMZM2G007038|GRMZM2G022052|GRMZM2G056462|GRMZM2G064390|GRMZM2G084062|GRMZM2G104649|GRMZM2G120942|GRMZM2G139614|GRMZM2G379758
GO:0016757	transferase activity, transferring glycosyl groups	F	23	-1.57477	GRMZM2G000393|GRMZM2G009125|GRMZM2G010987|GRMZM2G022242|GRMZM2G025231|GRMZM2G049484|GRMZM2G085854|GRMZM2G093347|GRMZM2G109431|GRMZM2G111642|GRMZM2G122072|GRMZM2G130449|GRMZM2G131329|GRMZM2G156026|GRMZM2G162755|GRMZM2G168474|GRMZM2G177631|GRMZM2G304712|GRMZM2G316534|GRMZM2G354610|GRMZM2G424832|GRMZM5G832805|GRMZM5G896260
GO:0003682	chromatin binding	F	31	-1.45147	AC204212.4_FG001|AC234155.1_FG002|GRMZM2G009060|GRMZM2G010085|GRMZM2G010920|GRMZM2G013581|GRMZM2G023667|GRMZM2G037650|GRMZM2G044862|GRMZM2G045748|GRMZM2G048403|GRMZM2G049695|GRMZM2G052544|GRMZM2G056400|GRMZM2G056986|GRMZM2G060485|GRMZM2G065829|GRMZM2G071468|GRMZM2G081919|GRMZM2G091265|GRMZM2G121753|GRMZM2G149590|GRMZM2G150260|GRMZM2G177220|GRMZM2G177974|GRMZM2G419305|GRMZM2G447745|GRMZM2G448104|G…
GO:0016301	kinase activity	F	60	-1.43523	GRMZM2G001668|GRMZM2G007283|GRMZM2G007848|GRMZM2G017164|GRMZM2G019267|GRMZM2G022054|GRMZM2G024151|GRMZM2G025459|GRMZM2G028709|GRMZM2G029407|GRMZM2G034052|GRMZM2G038791|GRMZM2G044038|GRMZM2G045330|GRMZM2G047588|GRMZM2G051677|GRMZM2G051984|GRMZM2G054663|GRMZM2G055678|GRMZM2G057475|GRMZM2G059151|GRMZM2G070218|GRMZM2G077278|GRMZM2G079913|GRMZM2G083016|GRMZM2G087201|GRMZM2G087459|GRMZM2G093316|GRMZM2G…
GO:0004842	ubiquitin-protein transferase activity	F	13	-1.3983	GRMZM2G020196|GRMZM2G021299|GRMZM2G039725|GRMZM2G062499|GRMZM2G100913|GRMZM2G116714|GRMZM2G124915|GRMZM2G132671|GRMZM2G140160|GRMZM2G143644|GRMZM2G178038|GRMZM2G309063|GRMZM6G399977
GO:0016887	ATPase activity	F	13	-1.38431	AC199782.5_FG001|GRMZM2G010085|GRMZM2G032218|GRMZM2G067853|GRMZM2G068259|GRMZM2G075336|GRMZM2G104325|GRMZM2G113203|GRMZM2G119345|GRMZM2G135199|GRMZM2G308860|GRMZM2G361256|GRMZM2G366146
GO:0017111	nucleoside-triphosphatase activity	F	12	-1.32266	GRMZM2G004040|GRMZM2G016602|GRMZM2G075336|GRMZM2G113203|GRMZM2G119345|GRMZM2G135199|GRMZM2G162968|GRMZM2G308860|GRMZM2G310947|GRMZM2G331833|GRMZM2G361256|GRMZM2G366146
GO:0016798	hydrolase activity, acting on glycosyl bonds	F	14	-1.30406	AC148152.3_FG008|GRMZM2G004435|GRMZM2G008247|GRMZM2G017186|GRMZM2G029845|GRMZM2G038281|GRMZM2G083812|GRMZM2G107815|GRMZM2G139300|GRMZM2G164676|GRMZM2G325008|GRMZM2G358153|GRMZM2G394450|GRMZM5G803981
GO:0003677	DNA binding	F	98	-1.29908	AC196475.3_FG005|AC203535.4_FG002|AC204212.4_FG001|AC234155.1_FG002|GRMZM2G003715|GRMZM2G009060|GRMZM2G010085|GRMZM2G010920|GRMZM2G011631|GRMZM2G013391|GRMZM2G013581|GRMZM2G016602|GRMZM2G019106|GRMZM2G020150|GRMZM2G023667|GRMZM2G024976|GRMZM2G032336|GRMZM2G037378|GRMZM2G037650|GRMZM2G041127|GRMZM2G042250|GRMZM2G044862|GRMZM2G045748|GRMZM2G046061|GRMZM2G048403|GRMZM2G049695|GRMZM2G051793|GRMZM2G05…
GO:0000287	magnesium ion binding	F	12	-1.2954	GRMZM2G020553|GRMZM2G026470|GRMZM2G038791|GRMZM2G049538|GRMZM2G077632|GRMZM2G078756|GRMZM2G093526|GRMZM2G104918|GRMZM2G108609|GRMZM2G179473|GRMZM2G390124|GRMZM2G398288
GO:0016772	transferase activity, transferring phosphorus-containing groups	F	75	-1.28344	AC218998.2_FG007|GRMZM2G001668|GRMZM2G003662|GRMZM2G007283|GRMZM2G007848|GRMZM2G017164|GRMZM2G019267|GRMZM2G019317|GRMZM2G024151|GRMZM2G028709|GRMZM2G029407|GRMZM2G034052|GRMZM2G040720|GRMZM2G042380|GRMZM2G043069|GRMZM2G044038|GRMZM2G045330|GRMZM2G047546|GRMZM2G047588|GRMZM2G051984|GRMZM2G055678|GRMZM2G063792|GRMZM2G066867|GRMZM2G073399|GRMZM2G077278|GRMZM2G077914|GRMZM2G079913|GRMZM2G087201|GRMZ…
GO:0005488	binding	F	31	-1.27558	GRMZM2G003607|GRMZM2G010362|GRMZM2G010637|GRMZM2G012178|GRMZM2G020196|GRMZM2G021299|GRMZM2G027862|GRMZM2G029077|GRMZM2G045303|GRMZM2G048067|GRMZM2G049288|GRMZM2G054210|GRMZM2G057576|GRMZM2G062042|GRMZM2G062499|GRMZM2G081907|GRMZM2G088088|GRMZM2G088231|GRMZM2G111355|GRMZM2G111491|GRMZM2G123537|GRMZM2G159002|GRMZM2G166897|GRMZM2G178829|GRMZM2G344967|GRMZM2G369912|GRMZM2G398809|GRMZM2G415846|GRMZM2G…
GO:0008270	zinc ion binding	F	143	-1.24013	AC226373.2_FG010|GRMZM2G004795|GRMZM2G004888|GRMZM2G007453|GRMZM2G010323|GRMZM2G011631|GRMZM2G012690|GRMZM2G012717|GRMZM2G013936|GRMZM2G018070|GRMZM2G018631|GRMZM2G019236|GRMZM2G020928|GRMZM2G025014|GRMZM2G025231|GRMZM2G028183|GRMZM2G030097|GRMZM2G032821|GRMZM2G034288|GRMZM2G034372|GRMZM2G036640|GRMZM2G036837|GRMZM2G037200|GRMZM2G038374|GRMZM2G039725|GRMZM2G044343|GRMZM2G044398|GRMZM2G046061|GRMZ…
GO:0005515	protein binding	F	253	-1.23224	AC155377.1_FG001|AC185226.4_FG001|AC199782.5_FG001|AC206968.3_FG003|GRMZM2G000719|GRMZM2G001084|GRMZM2G001639|GRMZM2G003663|GRMZM2G004278|GRMZM2G004888|GRMZM2G005195|GRMZM2G005732|GRMZM2G007372|GRMZM2G007587|GRMZM2G008273|GRMZM2G010075|GRMZM2G012031|GRMZM2G012178|GRMZM2G012690|GRMZM2G012717|GRMZM2G012932|GRMZM2G013936|GRMZM2G014116|GRMZM2G014720|GRMZM2G014805|GRMZM2G015364|GRMZM2G015419|GRMZM2G01…
GO:0046983	protein dimerization activity	F	16	-1.22225	GRMZM2G016756|GRMZM2G038848|GRMZM2G072238|GRMZM2G079200|GRMZM2G079957|GRMZM2G081406|GRMZM2G083504|GRMZM2G085467|GRMZM2G085924|GRMZM2G087582|GRMZM2G116785|GRMZM2G144097|GRMZM2G159285|GRMZM2G159937|GRMZM2G387528|GRMZM2G573324
GO:0003676	nucleic acid binding	F	89	-1.21785	AC226373.2_FG010|GRMZM2G003424|GRMZM2G003897|GRMZM2G004795|GRMZM2G008611|GRMZM2G009624|GRMZM2G010085|GRMZM2G010323|GRMZM2G011631|GRMZM2G019919|GRMZM2G020928|GRMZM2G021464|GRMZM2G025014|GRMZM2G029029|GRMZM2G029058|GRMZM2G036837|GRMZM2G036991|GRMZM2G037200|GRMZM2G042683|GRMZM2G044398|GRMZM2G044862|GRMZM2G046061|GRMZM2G049695|GRMZM2G050982|GRMZM2G057642|GRMZM2G057743|GRMZM2G065276|GRMZM2G065829|GRMZ…
GO:0000166	nucleotide binding	F	192	-1.20206	AC155377.1_FG001|AC199782.5_FG001|AC203173.3_FG004|AC210013.4_FG006|AC215201.3_FG005|GRMZM2G001668|GRMZM2G002656|GRMZM2G003424|GRMZM2G003662|GRMZM2G003897|GRMZM2G004040|GRMZM2G007038|GRMZM2G007848|GRMZM2G008611|GRMZM2G009624|GRMZM2G009940|GRMZM2G010768|GRMZM2G011631|GRMZM2G012958|GRMZM2G016602|GRMZM2G017164|GRMZM2G017671|GRMZM2G018251|GRMZM2G019267|GRMZM2G019317|GRMZM2G019919|GRMZM2G020928|GRMZM2…
GO:0005524	ATP binding	F	169	-1.20158	AC155377.1_FG001|AC199782.5_FG001|AC215201.3_FG005|AC218998.2_FG007|GRMZM2G000622|GRMZM2G001084|GRMZM2G001668|GRMZM2G003662|GRMZM2G003875|GRMZM2G004040|GRMZM2G007283|GRMZM2G007848|GRMZM2G010085|GRMZM2G016602|GRMZM2G017164|GRMZM2G017671|GRMZM2G017961|GRMZM2G019267|GRMZM2G019317|GRMZM2G020553|GRMZM2G023232|GRMZM2G024104|GRMZM2G024151|GRMZM2G028709|GRMZM2G029407|GRMZM2G032218|GRMZM2G034052|GRMZM2G03…
GO:0015035	protein disulfide oxidoreductase activity	F	18	-1.17454	GRMZM2G009928|GRMZM2G010491|GRMZM2G014055|GRMZM2G017419|GRMZM2G023711|GRMZM2G053023|GRMZM2G074193|GRMZM2G099474|GRMZM2G131202|GRMZM2G141707|GRMZM2G144653|GRMZM2G318213|GRMZM2G337706|GRMZM2G358009|GRMZM2G419836|GRMZM2G441144|GRMZM2G469994|GRMZM5G843368
GO:0009055	electron carrier activity	F	46	-1.17305	GRMZM2G009928|GRMZM2G010348|GRMZM2G010468|GRMZM2G010491|GRMZM2G012865|GRMZM2G014055|GRMZM2G017419|GRMZM2G020761|GRMZM2G021436|GRMZM2G035073|GRMZM2G053023|GRMZM2G056247|GRMZM2G059801|GRMZM2G066441|GRMZM2G070199|GRMZM2G070508|GRMZM2G071450|GRMZM2G079782|GRMZM2G085812|GRMZM2G087312|GRMZM2G089528|GRMZM2G093286|GRMZM2G099474|GRMZM2G102079|GRMZM2G104783|GRMZM2G106190|GRMZM2G121264|GRMZM2G121494|GRMZM2G…
GO:0004672	protein kinase activity	F	77	-1.1721	AC218998.2_FG007|GRMZM2G001668|GRMZM2G003662|GRMZM2G007283|GRMZM2G007848|GRMZM2G017164|GRMZM2G019267|GRMZM2G019317|GRMZM2G024151|GRMZM2G028709|GRMZM2G029407|GRMZM2G034052|GRMZM2G042380|GRMZM2G043069|GRMZM2G044038|GRMZM2G045330|GRMZM2G047546|GRMZM2G047588|GRMZM2G051984|GRMZM2G055678|GRMZM2G063792|GRMZM2G065214|GRMZM2G066867|GRMZM2G072584|GRMZM2G073399|GRMZM2G077278|GRMZM2G077914|GRMZM2G079913|GRMZ…
GO:0008168	methyltransferase activity	F	28	-1.14495	GRMZM2G000739|GRMZM2G002642|GRMZM2G039993|GRMZM2G050307|GRMZM2G063438|GRMZM2G065210|GRMZM2G077258|GRMZM2G077486|GRMZM2G085924|GRMZM2G089355|GRMZM2G099729|GRMZM2G116966|GRMZM2G119933|GRMZM2G122296|GRMZM2G125432|GRMZM2G128179|GRMZM2G130910|GRMZM2G131708|GRMZM2G135283|GRMZM2G136857|GRMZM2G140577|GRMZM2G150248|GRMZM2G157589|GRMZM2G179814|GRMZM2G336065|GRMZM2G405178|GRMZM2G423027|GRMZM5G876898
GO:0005215	transporter activity	F	28	-1.13154	AC205608.4_FG004|AC208897.3_FG004|GRMZM2G011590|GRMZM2G014914|GRMZM2G018281|GRMZM2G020484|GRMZM2G028325|GRMZM2G035790|GRMZM2G047187|GRMZM2G060183|GRMZM2G067789|GRMZM2G081192|GRMZM2G081239|GRMZM2G082184|GRMZM2G095611|GRMZM2G103945|GRMZM2G104942|GRMZM2G127134|GRMZM2G135739|GRMZM2G136872|GRMZM2G160460|GRMZM2G171880|GRMZM2G176253|GRMZM2G355610|GRMZM2G392975|GRMZM2G442523|GRMZM2G472167|GRMZM5G801949
GO:0046872	metal ion binding	F	175	-1.13132	AC226373.2_FG010|GRMZM2G000219|GRMZM2G003424|GRMZM2G003875|GRMZM2G004795|GRMZM2G005493|GRMZM2G005562|GRMZM2G007249|GRMZM2G010323|GRMZM2G010468|GRMZM2G012690|GRMZM2G012865|GRMZM2G015419|GRMZM2G018070|GRMZM2G018631|GRMZM2G020761|GRMZM2G020928|GRMZM2G021436|GRMZM2G025014|GRMZM2G025231|GRMZM2G025870|GRMZM2G028183|GRMZM2G032821|GRMZM2G033680|GRMZM2G033885|GRMZM2G035073|GRMZM2G036629|GRMZM2G036631|GRMZ…
GO:0003700	transcription factor activity, sequence-specific DNA binding	F	32	-1.12873	GRMZM2G002075|GRMZM2G010920|GRMZM2G013391|GRMZM2G019106|GRMZM2G020150|GRMZM2G024976|GRMZM2G033093|GRMZM2G041127|GRMZM2G042250|GRMZM2G045236|GRMZM2G055204|GRMZM2G059851|GRMZM2G064466|GRMZM2G071907|GRMZM2G073892|GRMZM2G076602|GRMZM2G080509|GRMZM2G081919|GRMZM2G104390|GRMZM2G116658|GRMZM2G120167|GRMZM2G122750|GRMZM2G127537|GRMZM2G130459|GRMZM2G148333|GRMZM2G171569|GRMZM2G175543|GRMZM2G177220|GRMZM2G…
GO:0016740	transferase activity	F	96	-1.11424	GRMZM2G000393|GRMZM2G000739|GRMZM2G001668|GRMZM2G003501|GRMZM2G007848|GRMZM2G009125|GRMZM2G010987|GRMZM2G022242|GRMZM2G023667|GRMZM2G025231|GRMZM2G028535|GRMZM2G033219|GRMZM2G035584|GRMZM2G039993|GRMZM2G044038|GRMZM2G047347|GRMZM2G048472|GRMZM2G049484|GRMZM2G050307|GRMZM2G051984|GRMZM2G059151|GRMZM2G060896|GRMZM2G063438|GRMZM2G065210|GRMZM2G068506|GRMZM2G077258|GRMZM2G077486|GRMZM2G082185|GRMZM2G…
GO:0003723	RNA binding	F	41	-1.10589	AC214507.3_FG001|GRMZM2G002616|GRMZM2G003424|GRMZM2G007453|GRMZM2G018080|GRMZM2G020928|GRMZM2G025014|GRMZM2G029029|GRMZM2G053767|GRMZM2G057743|GRMZM2G061105|GRMZM2G063473|GRMZM2G064914|GRMZM2G065276|GRMZM2G071034|GRMZM2G073521|GRMZM2G083642|GRMZM2G084062|GRMZM2G091419|GRMZM2G095782|GRMZM2G102829|GRMZM2G108677|GRMZM2G109009|GRMZM2G110402|GRMZM2G115198|GRMZM2G123537|GRMZM2G126691|GRMZM2G134419|GRMZ…
GO:0003735	structural constituent of ribosome	F	41	-1.09528	AC214640.3_FG003|AC225147.4_FG002|GRMZM2G013457|GRMZM2G019325|GRMZM2G022619|GRMZM2G024647|GRMZM2G026868|GRMZM2G030016|GRMZM2G030293|GRMZM2G030915|GRMZM2G032564|GRMZM2G032721|GRMZM2G044137|GRMZM2G047476|GRMZM2G054136|GRMZM2G060373|GRMZM2G066222|GRMZM2G083253|GRMZM2G084465|GRMZM2G102230|GRMZM2G108643|GRMZM2G123495|GRMZM2G132121|GRMZM2G138842|GRMZM2G140116|GRMZM2G145280|GRMZM2G150058|GRMZM2G152552|G…
GO:0016853	isomerase activity	F	15	-1.09467	GRMZM2G005493|GRMZM2G011662|GRMZM2G053397|GRMZM2G060011|GRMZM2G068963|GRMZM2G076544|GRMZM2G095333|GRMZM2G095782|GRMZM2G117746|GRMZM2G132811|GRMZM2G144273|GRMZM2G145895|GRMZM2G311919|GRMZM2G488458|GRMZM5G891282
GO:0016874	ligase activity	F	20	-1.09056	GRMZM2G003875|GRMZM2G020196|GRMZM2G021299|GRMZM2G024104|GRMZM2G062499|GRMZM2G075333|GRMZM2G086088|GRMZM2G091560|GRMZM2G102421|GRMZM2G124915|GRMZM2G132671|GRMZM2G134176|GRMZM2G148709|GRMZM2G155974|GRMZM2G157113|GRMZM2G178079|GRMZM2G309063|GRMZM2G379252|GRMZM2G386125|GRMZM5G828302
GO:0008233	peptidase activity	F	21	-1.08505	GRMZM2G000719|GRMZM2G008623|GRMZM2G016511|GRMZM2G017266|GRMZM2G065757|GRMZM2G066469|GRMZM2G070011|GRMZM2G074386|GRMZM2G090010|GRMZM2G098298|GRMZM2G103266|GRMZM2G107696|GRMZM2G112366|GRMZM2G117993|GRMZM2G129146|GRMZM2G131473|GRMZM2G140867|GRMZM2G145589|GRMZM2G148106|GRMZM2G176396|GRMZM2G459391
GO:0005509	calcium ion binding	F	30	-1.0838	GRMZM2G000397|GRMZM2G028516|GRMZM2G029107|GRMZM2G033680|GRMZM2G035557|GRMZM2G048549|GRMZM2G067511|GRMZM2G067546|GRMZM2G071071|GRMZM2G090609|GRMZM2G096228|GRMZM2G105362|GRMZM2G125838|GRMZM2G126235|GRMZM2G130889|GRMZM2G132019|GRMZM2G149923|GRMZM2G173424|GRMZM2G173868|GRMZM2G311220|GRMZM2G312661|GRMZM2G389362|GRMZM2G395244|GRMZM2G402171|GRMZM2G436947|GRMZM2G436986|GRMZM2G442551|GRMZM2G471904|GRMZM2G…
GO:0004553	hydrolase activity, hydrolyzing O-glycosyl compounds	F	23	-1.08353	AC148152.3_FG008|AC203753.4_FG006|GRMZM2G008247|GRMZM2G017186|GRMZM2G019619|GRMZM2G038281|GRMZM2G055699|GRMZM2G069024|GRMZM2G077015|GRMZM2G121514|GRMZM2G127117|GRMZM2G139300|GRMZM2G147849|GRMZM2G162359|GRMZM2G164676|GRMZM2G180716|GRMZM2G325008|GRMZM2G358153|GRMZM2G364748|GRMZM2G394450|GRMZM2G431039|GRMZM2G479746|GRMZM5G845736
GO:0004674	protein serine/threonine kinase activity	F	51	-1.07778	GRMZM2G001668|GRMZM2G003662|GRMZM2G007283|GRMZM2G007848|GRMZM2G017164|GRMZM2G019267|GRMZM2G019317|GRMZM2G024151|GRMZM2G028709|GRMZM2G034052|GRMZM2G043069|GRMZM2G044038|GRMZM2G045330|GRMZM2G047546|GRMZM2G047588|GRMZM2G055678|GRMZM2G063792|GRMZM2G066867|GRMZM2G077278|GRMZM2G077914|GRMZM2G079913|GRMZM2G087459|GRMZM2G089159|GRMZM2G105750|GRMZM2G110922|GRMZM2G111491|GRMZM2G113771|GRMZM2G126858|GRMZM2G…
GO:0016829	lyase activity	F	17	-1.07695	GRMZM2G005562|GRMZM2G044337|GRMZM2G046191|GRMZM2G049538|GRMZM2G059392|GRMZM2G069542|GRMZM2G074122|GRMZM2G081268|GRMZM2G093526|GRMZM2G094165|GRMZM2G108514|GRMZM2G108609|GRMZM2G113033|GRMZM2G312877|GRMZM2G390124|GRMZM5G835542|GRMZM5G842645
GO:0008234	cysteine-type peptidase activity	F	10	-1.04671	GRMZM2G014805|GRMZM2G018813|GRMZM2G054678|GRMZM2G070011|GRMZM2G098298|GRMZM2G107696|GRMZM2G108849|GRMZM2G376074|GRMZM2G450863|GRMZM5G820822
GO:0005507	copper ion binding	F	25	-1.03984	AC203173.3_FG004|GRMZM2G007249|GRMZM2G010348|GRMZM2G024104|GRMZM2G030097|GRMZM2G036629|GRMZM2G038848|GRMZM2G042080|GRMZM2G068244|GRMZM2G070199|GRMZM2G070422|GRMZM2G071450|GRMZM2G088064|GRMZM2G099340|GRMZM2G099696|GRMZM2G112149|GRMZM2G113033|GRMZM2G119482|GRMZM2G126732|GRMZM2G128114|GRMZM2G152925|GRMZM2G156516|GRMZM2G176397|GRMZM2G430807|GRMZM5G801031
GO:0020037	heme binding	F	31	-1.0379	GRMZM2G010348|GRMZM2G010468|GRMZM2G012865|GRMZM2G020761|GRMZM2G021436|GRMZM2G035073|GRMZM2G047968|GRMZM2G056247|GRMZM2G066441|GRMZM2G070199|GRMZM2G070508|GRMZM2G071745|GRMZM2G074169|GRMZM2G079348|GRMZM2G079782|GRMZM2G085812|GRMZM2G089528|GRMZM2G093286|GRMZM2G093346|GRMZM2G102079|GRMZM2G102959|GRMZM2G104783|GRMZM2G121264|GRMZM2G149273|GRMZM2G154752|GRMZM2G172826|GRMZM2G370745|GRMZM2G450233|GRMZM5G…
GO:0003924	GTPase activity	F	17	-1.0324	AC203173.3_FG004|GRMZM2G007038|GRMZM2G012958|GRMZM2G043822|GRMZM2G051782|GRMZM2G052509|GRMZM2G071071|GRMZM2G077632|GRMZM2G082180|GRMZM2G098129|GRMZM2G106061|GRMZM2G136455|GRMZM2G149847|GRMZM2G152466|GRMZM2G157462|GRMZM2G332809|GRMZM2G354604
GO:0005525	GTP binding	F	24	-1.03162	AC203173.3_FG004|GRMZM2G007038|GRMZM2G012958|GRMZM2G043822|GRMZM2G047476|GRMZM2G051782|GRMZM2G052509|GRMZM2G071071|GRMZM2G077632|GRMZM2G081622|GRMZM2G082180|GRMZM2G098129|GRMZM2G106061|GRMZM2G106795|GRMZM2G111355|GRMZM2G136455|GRMZM2G149847|GRMZM2G152466|GRMZM2G157462|GRMZM2G171060|GRMZM2G332809|GRMZM2G351125|GRMZM2G354604|GRMZM2G395844
GO:0016758	transferase activity, transferring hexosyl groups	F	14	-0.259152	GRMZM2G009125|GRMZM2G009626|GRMZM2G010987|GRMZM2G022242|GRMZM2G085854|GRMZM2G122072|GRMZM2G156026|GRMZM2G160523|GRMZM2G161335|GRMZM2G162755|GRMZM2G168474|GRMZM2G304712|GRMZM5G832805|GRMZM5G896260
GO:0005506	iron ion binding	F	36	-0.00776444	GRMZM2G010348|GRMZM2G010468|GRMZM2G012865|GRMZM2G015419|GRMZM2G020761|GRMZM2G021436|GRMZM2G035073|GRMZM2G056247|GRMZM2G059801|GRMZM2G060940|GRMZM2G064336|GRMZM2G066441|GRMZM2G070199|GRMZM2G070508|GRMZM2G085078|GRMZM2G085812|GRMZM2G086489|GRMZM2G089528|GRMZM2G093286|GRMZM2G100976|GRMZM2G102079|GRMZM2G104783|GRMZM2G121264|GRMZM2G126900|GRMZM2G141473|GRMZM2G147882|GRMZM2G154752|GRMZM2G156162|GRMZM2G…
GO:0030170	pyridoxal phosphate binding	F	15	1.00488	GRMZM2G037875|GRMZM2G044337|GRMZM2G054465|GRMZM2G081571|GRMZM2G088064|GRMZM2G108514|GRMZM2G113873|GRMZM2G124353|GRMZM2G135283|GRMZM2G137868|GRMZM2G144985|GRMZM2G170595|GRMZM2G346693|GRMZM2G357734|GRMZM2G444378
GO:0003824	catalytic activity	F	132	1.06369	AC148152.3_FG008|AC203753.4_FG006|AC210013.4_FG011|GRMZM2G003501|GRMZM2G003875|GRMZM2G008226|GRMZM2G008247|GRMZM2G011662|GRMZM2G013255|GRMZM2G017671|GRMZM2G019619|GRMZM2G019746|GRMZM2G022563|GRMZM2G022782|GRMZM2G024104|GRMZM2G024933|GRMZM2G028535|GRMZM2G036640|GRMZM2G037614|GRMZM2G037875|GRMZM2G038281|GRMZM2G040452|GRMZM2G040843|GRMZM2G044337|GRMZM2G046163|GRMZM2G046191|GRMZM2G047292|GRMZM2G04734…
GO:0016787	hydrolase activity	F	98	1.08614	AC191575.2_FG001|AC199782.5_FG001|GRMZM2G001905|GRMZM2G004435|GRMZM2G008247|GRMZM2G008623|GRMZM2G012546|GRMZM2G016511|GRMZM2G016605|GRMZM2G017186|GRMZM2G019177|GRMZM2G019619|GRMZM2G022402|GRMZM2G028700|GRMZM2G029845|GRMZM2G030097|GRMZM2G030463|GRMZM2G036640|GRMZM2G037379|GRMZM2G038281|GRMZM2G047376|GRMZM2G054056|GRMZM2G060866|GRMZM2G062394|GRMZM2G062585|GRMZM2G063276|GRMZM2G064001|GRMZM2G065757|G…
GO:0050660	flavin adenine dinucleotide binding	F	12	1.11005	GRMZM2G034152|GRMZM2G059191|GRMZM2G085078|GRMZM2G091456|GRMZM2G099666|GRMZM2G114234|GRMZM2G134708|GRMZM2G141473|GRMZM2G146644|GRMZM2G153928|GRMZM2G166145|GRMZM5G878558
GO:0004497	monooxygenase activity	F	20	1.11262	GRMZM2G010468|GRMZM2G012865|GRMZM2G020761|GRMZM2G021436|GRMZM2G035073|GRMZM2G056247|GRMZM2G066441|GRMZM2G070508|GRMZM2G085812|GRMZM2G089528|GRMZM2G093286|GRMZM2G102079|GRMZM2G104783|GRMZM2G113033|GRMZM2G121264|GRMZM2G154752|GRMZM2G172826|GRMZM2G370745|GRMZM5G810393|GRMZM5G837869
GO:0043565	sequence-specific DNA binding	F	21	1.11311	GRMZM2G002075|GRMZM2G013391|GRMZM2G019106|GRMZM2G041127|GRMZM2G042250|GRMZM2G045236|GRMZM2G059851|GRMZM2G064390|GRMZM2G064466|GRMZM2G071907|GRMZM2G073892|GRMZM2G080509|GRMZM2G104390|GRMZM2G116658|GRMZM2G120167|GRMZM2G122750|GRMZM2G127537|GRMZM2G180847|GRMZM2G361847|GRMZM2G384528|GRMZM5G800112
GO:0016491	oxidoreductase activity	F	123	1.11384	AC210013.4_FG006|GRMZM2G007249|GRMZM2G009940|GRMZM2G010468|GRMZM2G012865|GRMZM2G015419|GRMZM2G018251|GRMZM2G020761|GRMZM2G021436|GRMZM2G025243|GRMZM2G025870|GRMZM2G028535|GRMZM2G031107|GRMZM2G032222|GRMZM2G032684|GRMZM2G034152|GRMZM2G035073|GRMZM2G038365|GRMZM2G038848|GRMZM2G039396|GRMZM2G042080|GRMZM2G055857|GRMZM2G055936|GRMZM2G056247|GRMZM2G059191|GRMZM2G060940|GRMZM2G065171|GRMZM2G066441|GRMZ…
GO:0051536	iron-sulfur cluster binding	F	19	1.14661	GRMZM2G036427|GRMZM2G038365|GRMZM2G059801|GRMZM2G063729|GRMZM2G064336|GRMZM2G085078|GRMZM2G100976|GRMZM2G102959|GRMZM2G106190|GRMZM2G141473|GRMZM2G156162|GRMZM2G168412|GRMZM2G174769|GRMZM2G339563|GRMZM2G359127|GRMZM2G425647|GRMZM2G467356|GRMZM2G470653|GRMZM5G856338
GO:0016705	oxidoreductase activity, acting on paired donors, with incorporation or reduction of molecular oxygen	F	21	1.15005	GRMZM2G010468|GRMZM2G012865|GRMZM2G020761|GRMZM2G021436|GRMZM2G035073|GRMZM2G056247|GRMZM2G066441|GRMZM2G070508|GRMZM2G085812|GRMZM2G089528|GRMZM2G093286|GRMZM2G102079|GRMZM2G104783|GRMZM2G121264|GRMZM2G154752|GRMZM2G172826|GRMZM2G370745|GRMZM2G410515|GRMZM2G425647|GRMZM5G810393|GRMZM5G837869
GO:0015297	antiporter activity	F	11	1.20285	GRMZM2G010765|GRMZM2G031938|GRMZM2G037342|GRMZM2G043075|GRMZM2G067747|GRMZM2G151903|GRMZM2G158204|GRMZM2G161809|GRMZM2G170128|GRMZM5G800723|GRMZM6G734131
GO:0022857	transmembrane transporter activity	F	14	1.31356	AC208897.3_FG004|GRMZM2G018281|GRMZM2G060183|GRMZM2G067789|GRMZM2G086464|GRMZM2G109221|GRMZM2G135739|GRMZM2G154245|GRMZM2G160460|GRMZM2G163798|GRMZM2G326707|GRMZM2G442523|GRMZM5G801949|GRMZM5G811095
GO:0016788	hydrolase activity, acting on ester bonds	F	16	1.46632	GRMZM2G022402|GRMZM2G060866|GRMZM2G099802|GRMZM2G102572|GRMZM2G104226|GRMZM2G105189|GRMZM2G106427|GRMZM2G112968|GRMZM2G114131|GRMZM2G114707|GRMZM2G117030|GRMZM2G379773|GRMZM2G455171|GRMZM2G704381|GRMZM5G862317|GRMZM5G894029
