# Supplementary material for: Allele specific expression analysis identifies regulatory variation associated with stress-related genes in the Mexican highland maize landrace Palomero Toluqueño
Source: PeerJ. 2017 Aug 23;5:e3737. doi: 10.7717/peerj.3737 (PMC5572453; doi:10.7717/peerj.3737)
Supplement: Supplemental Information S6 [file peerj-05-3737-s006.xlsx]

## Sheet: ARACNE
Supplementary Data 6. Annotated co-expression data set for B73 leaves and the 7 TFs represented in the maize Affymetrix microarray.
MI: mutual information value for the TF-target interaction.
tf	tf_symbol	target	target_symbol	MI	ASE_call	target_description	target_ath_description
GRMZM2G003715	nactf61	GRMZM2G354909	---	0.284257	-1	Uncharacterized protein [Source:UniProtKB/TrEMBL;Acc:B8A3Q4]	NAD(P)-binding Rossmann-fold superfamily protein [Source:TAIR;Acc:AT1G01800]
GRMZM2G003715	nactf61	GRMZM2G155242	lpa1	0.279798	---	Inositol-3-phosphate synthase [Source:UniProtKB/Swiss-Prot;Acc:Q9FPK7]	Inositol-3-phosphate synthase isozyme 1 [Source:UniProtKB/Swiss-Prot;Acc:P42801]
GRMZM2G003715	nactf61	GRMZM2G063679	---	0.279539	---	Uncharacterized protein [Source:UniProtKB/TrEMBL;Acc:B6SXD9]	unknown protein; FUNCTIONS IN: molecular_function unknown; INVOLVED IN: biological_process unknown; LOCATED IN: endomembrane system; BEST Arabidopsis thaliana protein match is: unknown protein (TAIR:AT5G24610.1); Has 55 Blast hits to 55 proteins in /.../cies: Archae - 0; Bacteria - 0; Metazoa - 0; Fungi - 0; Plants - 55; Viruses - 0; Other Eukaryotes - 0 (source: NCBI BLink). [Source:TAIR;Acc:AT3…
GRMZM2G003715	nactf61	GRMZM2G148281	opr7	0.269278	-1	12-oxo-phytodienoic acid reductase; Uncharacterized protein [Source:UniProtKB/TrEMBL;Acc:Q49HD8]	12-oxophytodienoate reductase 3 [Source:UniProtKB/Swiss-Prot;Acc:Q9FUP0]
GRMZM2G003715	nactf61	GRMZM2G077333	psbs1	0.264	---	Photosystem II 22 kDa protein [Source:UniProtKB/TrEMBL;Acc:B6TKD1]	Photosystem II 22 kDa protein, chloroplastic [Source:UniProtKB/Swiss-Prot;Acc:Q9XF91]
GRMZM2G003715	nactf61	GRMZM2G028393	sci1	0.26273	---	---	---
GRMZM2G003715	nactf61	GRMZM2G169890	sod4	0.257457	1	Superoxide dismutase [Cu-Zn] 4A [Source:UniProtKB/Swiss-Prot;Acc:P23345]	Superoxide dismutase [Cu-Zn] 1 [Source:UniProtKB/Swiss-Prot;Acc:P24704]
GRMZM2G003715	nactf61	GRMZM2G161905	gst25	0.255611	---	---	---
GRMZM2G003715	nactf61	GRMZM2G059496	---	0.254938	---	---	---
GRMZM2G003715	nactf61	GRMZM2G432796	---	0.253174	---	Uncharacterized protein [Source:UniProtKB/TrEMBL;Acc:C0PJC7]	Protein kinase superfamily protein [Source:TAIR;Acc:AT1G74330]
GRMZM2G003715	nactf61	GRMZM2G470882	---	0.251497	---	---	---
GRMZM2G003715	nactf61	GRMZM2G162359	---	0.25049	1	---	---
GRMZM2G003715	nactf61	GRMZM2G006977	---	0.245435	---	Uncharacterized protein [Source:UniProtKB/TrEMBL;Acc:C0PK25]	Putative calcium-transporting ATPase 7, plasma membrane-type [Source:UniProtKB/Swiss-Prot;Acc:O64806]
GRMZM2G003715	nactf61	GRMZM2G175071	---	0.242876	---	Hydroxymethylglutaryl-CoA lyase; Uncharacterized protein [Source:UniProtKB/TrEMBL;Acc:B4FFY3]	Hydroxymethylglutaryl-CoA lyase, mitochondrial [Source:UniProtKB/Swiss-Prot;Acc:O81027]
GRMZM2G003715	nactf61	GRMZM2G120539	---	0.239972	-1	AMP binding protein [Source:UniProtKB/TrEMBL;Acc:B6ST13]	Probable acyl-activating enzyme 2 [Source:UniProtKB/Swiss-Prot;Acc:Q9SEY5]
GRMZM2G003715	nactf61	GRMZM2G315401	---	0.238831	---	Uncharacterized protein [Source:UniProtKB/TrEMBL;Acc:C0PD02]	Galactose mutarotase-like superfamily protein [Source:TAIR;Acc:AT3G47800]
GRMZM2G003715	nactf61	GRMZM5G890190	---	0.23641	---	USP family protein [Source:UniProtKB/TrEMBL;Acc:B6TWE1]	Adenine nucleotide alpha hydrolases-like superfamily protein [Source:TAIR;Acc:AT4G27320]
GRMZM2G003715	nactf61	GRMZM2G098460	---	0.234106	---	Drought-induced protein 1; Uncharacterized protein [Source:UniProtKB/TrEMBL;Acc:B6SQ97]	chaperone protein dnaJ-related [Source:TAIR;Acc:AT5G43260]
GRMZM2G003715	nactf61	GRMZM2G122039	---	0.233554	---	Cytochrome b-c1 complex subunit 6 [Source:UniProtKB/TrEMBL;Acc:B6TLS6]	Ubiquinol-cytochrome C reductase hinge protein [Source:TAIR;Acc:AT2G01090]
GRMZM2G003715	nactf61	GRMZM2G099425	---	0.233416	---	Calcium-dependent protein kinase, isoform AK1; Uncharacterized protein [Source:UniProtKB/TrEMBL;Acc:B6SKK9]	Calcium-dependent protein kinase 14 [Source:UniProtKB/Swiss-Prot;Acc:P93759]
GRMZM2G003715	nactf61	GRMZM2G125268	aldh2	0.231521	---	Uncharacterized protein [Source:UniProtKB/TrEMBL;Acc:K7U0I1]	Aldehyde dehydrogenase family 2 member B7, mitochondrial [Source:UniProtKB/Swiss-Prot;Acc:Q8S528]
GRMZM2G003715	nactf61	GRMZM2G131099	---	0.231413	---	---	---
GRMZM2G003715	nactf61	GRMZM2G008290	umc2181	0.227921	---	Metal ion binding protein [Source:UniProtKB/TrEMBL;Acc:B6SZL4]	Heavy metal transport/detoxification superfamily protein [Source:TAIR;Acc:AT5G60800]
GRMZM2G003715	nactf61	GRMZM2G089400	---	0.227535	---	Lipid binding protein [Source:UniProtKB/TrEMBL;Acc:K7VDB3]	Bifunctional inhibitor/lipid-transfer protein/seed storage 2S albumin superfamily protein [Source:TAIR;Acc:AT1G62790]
GRMZM2G003715	nactf61	GRMZM2G039536	---	0.227192	---	Uncharacterized protein [Source:UniProtKB/TrEMBL;Acc:B6SQ46]	unknown protein; Has 30201 Blast hits to 17322 proteins in 780 species: Archae - 12; Bacteria - 1396; Metazoa - 17338; Fungi - 3422; Plants - 5037; Viruses - 0; Other Eukaryotes - 2996 (source: NCBI BLink). [Source:TAIR;Acc:AT5G40500]
GRMZM2G003715	nactf61	GRMZM2G443265	---	0.226659	---	---	---
GRMZM2G003715	nactf61	GRMZM5G826174	cle21	0.225954	---	---	---
GRMZM2G003715	nactf61	GRMZM2G012479	---	0.224936	---	Glutathione peroxidase [Source:UniProtKB/TrEMBL;Acc:C0P3R8]	Putative glutathione peroxidase 7, chloroplastic [Source:UniProtKB/Swiss-Prot;Acc:Q9SZ54]
GRMZM2G003715	nactf61	GRMZM2G075712	---	0.224396	---	---	---
GRMZM2G003715	nactf61	GRMZM2G016236	---	0.22323	---	Uncharacterized protein [Source:UniProtKB/TrEMBL;Acc:B4FA37]	Uncharacterized oxidoreductase At1g06690, chloroplastic [Source:UniProtKB/Swiss-Prot;Acc:Q94A68]
GRMZM2G003715	nactf61	GRMZM2G003506	---	0.223093	---	Uncharacterized protein [Source:UniProtKB/TrEMBL;Acc:C4J5B0]	Cytochrome b561 and DOMON domain-containing protein At5g35735 [Source:UniProtKB/Swiss-Prot;Acc:Q9FKH6]
GRMZM2G003715	nactf61	GRMZM2G110044	---	0.222727	---	Uncharacterized protein [Source:UniProtKB/TrEMBL;Acc:C0HG75]	Ribosome associated membrane protein RAMP4 [Source:TAIR;Acc:AT1G27330]
GRMZM2G003715	nactf61	GRMZM2G447795	---	0.222393	---	---	---
GRMZM2G003715	nactf61	GRMZM2G382785	---	0.219691	---	---	---
GRMZM2G003715	nactf61	AC198418.3_FG005	rh4	0.219128	---	Nucleolar RNA helicase 2 [Source:UniProtKB/TrEMBL;Acc:B6SSK6]	DEAD-box ATP-dependent RNA helicase 3, chloroplastic [Source:UniProtKB/Swiss-Prot;Acc:Q8L7S8]
GRMZM2G003715	nactf61	GRMZM2G007195	---	0.218246	---	Uncharacterized protein [Source:UniProtKB/TrEMBL;Acc:K7UJ78]	UDP-glucuronic acid decarboxylase 4 [Source:UniProtKB/Swiss-Prot;Acc:Q8S8T4]
GRMZM2G003715	nactf61	GRMZM2G060257	---	0.216936	---	Uncharacterized protein [Source:UniProtKB/TrEMBL;Acc:B7ZYR0]	F-box protein PP2-A13 [Source:UniProtKB/Swiss-Prot;Acc:Q9LEX0]
GRMZM2G003715	nactf61	GRMZM2G129954	---	0.215708	---	Response regulator 6; Uncharacterized protein [Source:UniProtKB/TrEMBL;Acc:C0PKF4]	Two-component response regulator ARR8 [Source:UniProtKB/Swiss-Prot;Acc:O80365]
GRMZM2G003715	nactf61	GRMZM2G087259	---	0.215668	---	---	---
GRMZM2G003715	nactf61	GRMZM2G028096	---	0.215612	-1	---	---
GRMZM2G003715	nactf61	GRMZM2G173630	---	0.215011	---	Putative GID1-like gibberellin receptor [Source:UniProtKB/TrEMBL;Acc:K7V4C5]	Gibberellin receptor GID1B [Source:UniProtKB/Swiss-Prot;Acc:Q9LYC1]
GRMZM2G003715	nactf61	GRMZM2G437100	---	0.213879	---	16.9 kDa class I heat shock protein 1 [Source:UniProtKB/TrEMBL;Acc:B6SIX0]	18.1 kDa class I heat shock protein [Source:UniProtKB/Swiss-Prot;Acc:P19037]
GRMZM2G003715	nactf61	GRMZM2G166348	---	0.213572	---	---	---
GRMZM2G003715	nactf61	GRMZM2G117989	prp3	0.213085	---	Win1; Win1 isoform 1; Win1 isoform 2; Win1 isoform 3 [Source:UniProtKB/TrEMBL;Acc:B6SH12]	Hevein-like preproprotein [Source:UniProtKB/Swiss-Prot;Acc:P43082]
GRMZM2G003715	nactf61	GRMZM5G851862	---	0.212327	---	Uncharacterized protein [Source:UniProtKB/TrEMBL;Acc:C0P4J8]	Cytochrome P450 76C2 [Source:UniProtKB/Swiss-Prot;Acc:O64637]
GRMZM2G003715	nactf61	GRMZM2G079668	---	0.211299	---	---	---
GRMZM2G003715	nactf61	GRMZM2G015605	nac1	0.210151	---	---	---
GRMZM2G003715	nactf61	GRMZM2G142093	---	0.209403	-1	---	---
GRMZM2G003715	nactf61	GRMZM2G090051	hyd6	0.208941	---		Beta-carotene 3-hydroxylase 1, chloroplastic [Source:UniProtKB/Swiss-Prot;Acc:Q9SZZ8]
GRMZM2G003715	nactf61	GRMZM2G117878	---	0.208619	---	---	---
GRMZM2G003715	nactf61	GRMZM2G007256	---	0.20857	---	---	---
GRMZM2G003715	nactf61	GRMZM2G094510	---	0.208375	---	---	---
GRMZM2G003715	nactf61	GRMZM2G415793	---	0.208097	---	Allene oxide cyclase 4; Uncharacterized protein [Source:UniProtKB/TrEMBL;Acc:B4FUX0]	Allene oxide cyclase 1, chloroplastic [Source:UniProtKB/Swiss-Prot;Acc:Q9LS03]
GRMZM2G003715	nactf61	GRMZM2G133684	---	0.205182	---	Uncharacterized protein [Source:UniProtKB/TrEMBL;Acc:B4FCL4]	Integral membrane HPP family protein [Source:TAIR;Acc:AT5G62720]
GRMZM2G003715	nactf61	GRMZM2G111143	---	0.20389	---	Uncharacterized protein [Source:UniProtKB/TrEMBL;Acc:B4FAW5]	O-Glycosyl hydrolases family 17 protein [Source:TAIR;Acc:AT3G55430]
GRMZM2G003715	nactf61	GRMZM2G067489	---	0.203604	---	---	---
GRMZM2G003715	nactf61	GRMZM2G352855	---	0.203537	-1	Uncharacterized protein [Source:UniProtKB/TrEMBL;Acc:B4FU03]	Lecithin-cholesterol acyltransferase-like 1 [Source:UniProtKB/Swiss-Prot;Acc:Q9FZI8]
GRMZM2G003715	nactf61	GRMZM2G374971	sip1	0.203353	---	Zeamatin [Source:UniProtKB/Swiss-Prot;Acc:P33679]	Osmotin-like protein OSM34 [Source:UniProtKB/Swiss-Prot;Acc:P50700]
GRMZM2G003715	nactf61	GRMZM2G047995	---	0.202954	---	Uncharacterized protein [Source:UniProtKB/TrEMBL;Acc:B4FYV7]	alpha/beta-Hydrolases superfamily protein [Source:TAIR;Acc:AT5G18630]
GRMZM2G003715	nactf61	GRMZM2G105539	---	0.202583	---	Arsenical pump-driving ATPase [Source:UniProtKB/TrEMBL;Acc:B6TZB7]	P-loop containing nucleoside triphosphate hydrolases superfamily protein [Source:TAIR;Acc:AT3G10350]
GRMZM2G003715	nactf61	GRMZM2G051043	---	0.202065	---	CID11 [Source:UniProtKB/TrEMBL;Acc:B6TAN7]	Polyadenylate-binding protein-interacting protein 9 [Source:UniProtKB/Swiss-Prot;Acc:Q9LRR6]
GRMZM2G003715	nactf61	GRMZM2G094723	---	0.202034	---	---	---
GRMZM2G003715	nactf61	GRMZM2G044720	---	0.201736	---	Uncharacterized protein [Source:UniProtKB/TrEMBL;Acc:B4FX74]	ORMDL family protein [Source:TAIR;Acc:AT5G42000]
GRMZM2G003715	nactf61	GRMZM2G345700	---	0.201319	---	36.4 kDa proline-rich protein; Uncharacterized protein [Source:UniProtKB/TrEMBL;Acc:B4G127]	Bifunctional inhibitor/lipid-transfer protein/seed storage 2S albumin superfamily protein [Source:TAIR;Acc:AT3G22142]
GRMZM2G003715	nactf61	GRMZM5G881887	hm1	0.200812	---	---	---
GRMZM2G003715	nactf61	GRMZM2G145461	chn2	0.200554	---	---	---
GRMZM2G003715	nactf61	GRMZM2G170842	---	0.200037	---	Uncharacterized protein [Source:UniProtKB/TrEMBL;Acc:B4F9D4]	Alkaline/neutral invertase CINV2 [Source:UniProtKB/Swiss-Prot;Acc:Q67XD9]
GRMZM2G003715	nactf61	GRMZM2G156632	wip1	0.199591	---	---	---
GRMZM2G003715	nactf61	GRMZM2G029087	---	0.196412	---	Uncharacterized protein [Source:UniProtKB/TrEMBL;Acc:C4J9Y5]	Bax inhibitor 1 [Source:UniProtKB/Swiss-Prot;Acc:Q9LD45]
GRMZM2G003715	nactf61	GRMZM2G069542	pep2	0.196312	-1	---	---
GRMZM2G003715	nactf61	GRMZM2G052507	---	0.196166	---	Serine carboxypeptidase 1 [Source:UniProtKB/TrEMBL;Acc:B6U0V5]	Serine carboxypeptidase-like 45 [Source:UniProtKB/Swiss-Prot;Acc:Q93Y09]
GRMZM2G003715	nactf61	GRMZM2G017110	---	0.196021	---	Glutamate decarboxylase; Uncharacterized protein [Source:UniProtKB/TrEMBL;Acc:B6TT27]	Pyridoxal phosphate (PLP)-dependent transferases superfamily protein [Source:TAIR;Acc:AT3G17720]
GRMZM2G003715	nactf61	GRMZM2G048129	---	0.195701	---	MtN19-like protein [Source:UniProtKB/TrEMBL;Acc:B6SZN0]	FUNCTIONS IN: molecular_function unknown; INVOLVED IN: biological_process unknown; LOCATED IN: vacuole; EXPRESSED IN: 24 plant structures; EXPRESSED DURING: 15 growth stages; CONTAINS InterPro DOMAIN/s: Stress up-regulated Nod 19 (InterPro:IPR011692 /.../ 30201 Blast hits to 17322 proteins in 780 species: Archae - 12; Bacteria - 1396; Metazoa - 17338; Fungi - 3422; Plants - 5037; Viruses - 0; Oth…
GRMZM2G003715	nactf61	GRMZM2G109056	lox4	0.195228	---	Lipoxygenase [Source:UniProtKB/TrEMBL;Acc:C0P840]	Linoleate 9S-lipoxygenase 1 [Source:UniProtKB/Swiss-Prot;Acc:Q06327]
GRMZM2G003715	nactf61	GRMZM2G087186	pdc3	0.194941	---	---	---
GRMZM2G003715	nactf61	GRMZM2G411333	---	0.194929	-1	Uncharacterized protein [Source:UniProtKB/TrEMBL;Acc:C0HE64]	Eukaryotic aspartyl protease family protein [Source:TAIR;Acc:AT1G05840]
GRMZM2G003715	nactf61	GRMZM2G130943	---	0.194367	---	Uncharacterized protein [Source:UniProtKB/TrEMBL;Acc:B4F936]	Probable protein phosphatase 2C 63 [Source:UniProtKB/Swiss-Prot;Acc:O81760]
GRMZM2G003715	nactf61	GRMZM2G006377	---	0.193589	---	xylem bark cysteine peptidase 3 [Source:Projected from Arabidopsis thaliana (AT1G09850) TAIR;Acc:AT1G09850]	xylem bark cysteine peptidase 3 [Source:TAIR;Acc:AT1G09850]
GRMZM2G003715	nactf61	GRMZM2G181505	---	0.193353	---	pyrimidine 1 [Source:Projected from Arabidopsis thaliana (AT3G17810) TAIR;Acc:AT3G17810]	Dihydropyrimidine dehydrogenase (NADP(+)), chloroplastic [Source:UniProtKB/Swiss-Prot;Acc:Q9LVI9]
GRMZM2G003715	nactf61	GRMZM2G134334	---	0.192679	-1	Multiple stress-responsive zinc-finger protein ISAP1 [Source:UniProtKB/TrEMBL;Acc:B6UIJ0]	Zinc finger A20 and AN1 domain-containing stress-associated protein 5 [Source:UniProtKB/Swiss-Prot;Acc:Q9LHJ8]
GRMZM2G003715	nactf61	GRMZM2G027478	---	0.192333	---	Putative uncharacterized protein [Source:UniProtKB/TrEMBL;Acc:B6SY86]	unknown protein; Has 39 Blast hits to 39 proteins in 15 species: Archae - 0; Bacteria - 0; Metazoa - 0; Fungi - 0; Plants - 39; Viruses - 0; Other Eukaryotes - 0 (source: NCBI BLink). [Source:TAIR;Acc:AT3G56290]
GRMZM2G003715	nactf61	GRMZM5G838098	zim27	0.191865	---	---	---
GRMZM2G003715	nactf61	GRMZM2G129189	epr4	0.191733	---	Endochitinase PR4; Uncharacterized protein [Source:UniProtKB/TrEMBL;Acc:B6TT00]	Chitinase family protein [Source:TAIR;Acc:AT1G56680]
GRMZM2G003715	nactf61	GRMZM2G031607	---	0.191707	1	Uncharacterized protein [Source:UniProtKB/TrEMBL;Acc:K7V4W0]	SGS domain-containing protein [Source:TAIR;Acc:AT1G30070]
GRMZM2G003715	nactf61	GRMZM2G132212	---	0.190905	---	Putative leucine-rich repeat receptor-like protein kinase family protein [Source:UniProtKB/TrEMBL;Acc:K7UQS5]	Protein kinase family protein with leucine-rich repeat domain [Source:TAIR;Acc:AT5G25930]
GRMZM2G003715	nactf61	GRMZM2G079583	---	0.190286	---	Putative leucine-rich repeat transmembrane protein kinase family protein isoform 1; Putative leucine-rich repeat transmembrane protein kinase family protein isoform 2; Putative leucine-rich repeat transmembrane protein kinase family protein isoform 3; Putative leucine-rich repeat transmembrane protein kinase family protein isoform 4; Uncharacterized protein [Source:UniProtKB/TrEMBL;Acc:B4FKZ8]	Probable LRR receptor-like serine/threonine-protein kinase MRH1 [Source:UniProtKB/Swiss-Prot;Acc:C0LGQ4]
GRMZM2G003715	nactf61	GRMZM2G159854	---	0.190272	---	Uncharacterized protein [Source:UniProtKB/TrEMBL;Acc:K7U3M3]	Protein AUXIN RESPONSE 4 [Source:UniProtKB/Swiss-Prot;Acc:Q9FZ33]
GRMZM2G003715	nactf61	GRMZM2G164405	acs2	0.18803	---	Acc synthase [Source:UniProtKB/TrEMBL;Acc:Q6JN59]	1-aminocyclopropane-1-carboxylate synthase-like protein 1 [Source:UniProtKB/Swiss-Prot;Acc:Q06429]
GRMZM2G003715	nactf61	GRMZM5G852396	---	0.187857	---	Uncharacterized protein [Source:UniProtKB/TrEMBL;Acc:K7V6R8]	unknown protein; CONTAINS InterPro DOMAIN/s: Protein of unknown function DUF1674 (InterPro:IPR012875); Has 30201 Blast hits to 17322 proteins in 780 species: Archae - 12; Bacteria - 1396; Metazoa - 17338; Fungi - 3422; Plants - 5037; Viruses - 0; Ot /.../karyotes - 2996 (source: NCBI BLink). [Source:TAIR;Acc:AT5G67490]
GRMZM2G003715	nactf61	GRMZM2G137329	umc1177	0.186995	-1	Nonspecific lipid-transfer protein [Source:UniProtKB/TrEMBL;Acc:B6SP11]	Bifunctional inhibitor/lipid-transfer protein/seed storage 2S albumin superfamily protein [Source:TAIR;Acc:AT3G57310]
GRMZM2G003715	nactf61	GRMZM2G151223	hk1	0.186178	---	Uncharacterized protein [Source:UniProtKB/TrEMBL;Acc:C0PF17]	Histidine kinase 4 [Source:UniProtKB/Swiss-Prot;Acc:Q9C5U0]
GRMZM2G003715	nactf61	GRMZM2G041959	---	0.185003	---	Uncharacterized protein [Source:UniProtKB/TrEMBL;Acc:C0HHL6]	F-box/kelch-repeat protein At1g74510 [Source:UniProtKB/Swiss-Prot;Acc:Q9CA63]
GRMZM2G003715	nactf61	GRMZM2G112830	trpp6	0.183853	---	---	---
GRMZM2G003715	nactf61	GRMZM2G033644	---	0.18376	---	2-oxoacid dehydrogenases acyltransferase family protein [Source:Projected from Arabidopsis thaliana (AT3G06850) TAIR;Acc:AT3G06850]	Lipoamide acyltransferase component of branched-chain alpha-keto acid dehydrogenase complex, mitochondrial [Source:UniProtKB/Swiss-Prot;Acc:Q9M7Z1]
GRMZM2G003715	nactf61	GRMZM2G011520	---	0.183678	---	Rhodanese/Cell cycle control phosphatase superfamily protein [Source:Projected from Arabidopsis thaliana (AT5G03455) TAIR;Acc:AT5G03455]	Dual specificity phosphatase Cdc25 [Source:UniProtKB/Swiss-Prot;Acc:Q8GY31]
GRMZM2G003715	nactf61	GRMZM2G316967	tpl1	0.182954	---	---	---
GRMZM2G003715	nactf61	GRMZM2G109959	---	0.182546	---	---	---
GRMZM2G003715	nactf61	GRMZM2G011923	---	0.182437	---	Uncharacterized protein [Source:UniProtKB/TrEMBL;Acc:B4FUR5]	DCD (Development and Cell Death) domain protein [Source:TAIR;Acc:AT3G27090]
GRMZM2G003715	nactf61	GRMZM2G401848	---	0.182079	---	---	---
GRMZM2G003715	nactf61	GRMZM2G459391	---	0.181936	-1	ATP-dependent Clp protease adaptor protein ClpS containing protein; Uncharacterized protein [Source:UniProtKB/TrEMBL;Acc:B4FRY9]	Ribosomal protein L12/ ATP-dependent Clp protease adaptor protein ClpS family protein [Source:TAIR;Acc:AT1G68660]
GRMZM2G003715	nactf61	GRMZM2G056772	---	0.181687	-1	Uncharacterized protein [Source:UniProtKB/TrEMBL;Acc:B4FAK7]	senescence associated gene 20 [Source:TAIR;Acc:AT3G10985]
GRMZM2G003715	nactf61	GRMZM2G055331	---	0.180818	---	Putative sucrose-phosphate synthase family protein isoform 1; Putative sucrose-phosphate synthase family protein isoform 2; Putative sucrose-phosphate synthase family protein isoform 3 [Source:UniProtKB/TrEMBL;Acc:K7TVD9]	Probable sucrose-phosphate synthase 2 [Source:UniProtKB/Swiss-Prot;Acc:Q9FY54]
GRMZM2G003715	nactf61	GRMZM2G130034	---	0.180553	---	ureidoglycolate amidohydrolase [Source:Projected from Arabidopsis thaliana (AT5G43600) TAIR;Acc:AT5G43600]	Ureidoglycolate hydrolase [Source:UniProtKB/Swiss-Prot;Acc:Q8VXY9]
GRMZM2G003715	nactf61	GRMZM2G149317	psy2	0.179581	---	---	---
GRMZM2G003715	nactf61	GRMZM2G412899	---	0.17597	---	Metabolite transport protein csbC; Metabolite transport protein csbC isoform 1; Metabolite transport protein csbC isoform 2 [Source:UniProtKB/TrEMBL;Acc:B6T8Z2]	Probable plastidic glucose transporter 3 [Source:UniProtKB/Swiss-Prot;Acc:Q2V4B9]
GRMZM2G003715	nactf61	GRMZM2G134844	---	0.175709	---	Uncharacterized protein [Source:UniProtKB/TrEMBL;Acc:K7VGK6]	nonsense-mediated mRNA decay NMD3 family protein [Source:TAIR;Acc:AT2G03820]
GRMZM2G003715	nactf61	GRMZM2G133781	---	0.174984	---	---	---
GRMZM2G003715	nactf61	GRMZM2G375116	---	0.17216	---	Uncharacterized protein [Source:UniProtKB/TrEMBL;Acc:B4FAH1]	Potassium transporter 8 [Source:UniProtKB/Swiss-Prot;Acc:Q9M7J9]
GRMZM2G003715	nactf61	GRMZM2G056038	---	0.170757	---	Uncharacterized protein [Source:UniProtKB/TrEMBL;Acc:C0PB70]	Sterile alpha motif (SAM) domain-containing protein [Source:TAIR;Acc:AT3G07760]
GRMZM2G003715	nactf61	GRMZM2G420801	etr2	0.16876	---	Ethylene receptor; Ethylene receptor homologue; Ethylene receptor-like protein [Source:UniProtKB/TrEMBL;Acc:Q9FXT2]	Ethylene response sensor 2 [Source:UniProtKB/Swiss-Prot;Acc:P93825]
GRMZM2G003715	nactf61	GRMZM2G093716	IDP51	0.164028	---	P-loop containing nucleoside triphosphate hydrolases superfamily protein [Source:Projected from Arabidopsis thaliana (AT5G22370) TAIR;Acc:AT5G22370]	P-loop containing nucleoside triphosphate hydrolases superfamily protein [Source:TAIR;Acc:AT5G22370]
GRMZM2G003715	nactf61	GRMZM2G040587	---	0.163532	1	Mitochondrial import inner membrane translocase subunit TIM14 [Source:UniProtKB/TrEMBL;Acc:B6TQ49]	Mitochondrial import inner membrane translocase subunit TIM14-1 [Source:UniProtKB/Swiss-Prot;Acc:Q8RV04]
GRMZM2G003715	nactf61	GRMZM2G173063	---	0.161799	---	---	---
GRMZM2G003715	nactf61	GRMZM2G154747	---	0.111904	---	Plasma membrane associated protein [Source:UniProtKB/TrEMBL;Acc:B6SJ93]	AWPM-19-like family protein [Source:TAIR;Acc:AT1G04560]
GRMZM2G003715	nactf61	GRMZM5G828488	---	0.102837	---	Ids4-like protein [Source:UniProtKB/TrEMBL;Acc:B6TC58]	SPX domain-containing protein 3 [Source:UniProtKB/Swiss-Prot;Acc:Q5PP62]
GRMZM2G003715	nactf61	GRMZM2G574887	---	0.0795659	---	---	---
GRMZM2G041127	hb54	GRMZM2G012923	pza00270	0.466301	---	Uncharacterized protein [Source:UniProtKB/TrEMBL;Acc:K7TS07]	Monosaccharide-sensing protein 2 [Source:UniProtKB/Swiss-Prot;Acc:Q8LPQ8]
GRMZM2G041127	hb54	GRMZM2G086763	---	0.412212	---	Chloroplast post-illumination chlorophyll fluorescence increase protein [Source:UniProtKB/TrEMBL;Acc:A1Y9I7]	post-illumination chlorophyll fluorescence increase [Source:TAIR;Acc:AT3G15840]
GRMZM2G041127	hb54	GRMZM2G101818	---	0.40936	---	---	---
GRMZM2G041127	hb54	GRMZM2G103945	tip4a	0.395228	1	---	---
GRMZM2G041127	hb54	GRMZM2G040030	---	0.392511	---	Cold acclimation protein COR413-PM1; Uncharacterized protein [Source:UniProtKB/TrEMBL;Acc:Q84LB4]	Cold-regulated 413 plasma membrane protein 1 [Source:UniProtKB/Swiss-Prot;Acc:Q9XIM7]
GRMZM2G041127	hb54	GRMZM2G045664	---	0.387111	---	Uncharacterized protein [Source:UniProtKB/TrEMBL;Acc:B4G1C1]	Desiccation-related protein At2g46140 [Source:UniProtKB/Swiss-Prot;Acc:O82355]
GRMZM2G041127	hb54	GRMZM2G014833	pk4	0.384589	---	Uncharacterized protein [Source:UniProtKB/TrEMBL;Acc:C0P7I2]	CBL-interacting serine/threonine-protein kinase 13 [Source:UniProtKB/Swiss-Prot;Acc:O22971]
GRMZM2G041127	hb54	GRMZM2G034326	---	0.382002	-1	DNA-directed RNA polymerases I, II, and III 17.1 kDa polypeptide; Uncharacterized protein [Source:UniProtKB/TrEMBL;Acc:B4FPA6]	DNA-directed RNA polymerases II, IV and V subunit 8B [Source:UniProtKB/Swiss-Prot;Acc:Q9M1A8]
GRMZM2G041127	hb54	GRMZM2G089836	ivr2	0.374335	---	Beta-fructofuranosidase 1; Invertase [Source:UniProtKB/TrEMBL;Acc:B6T0A9]	Acid beta-fructofuranosidase 3, vacuolar [Source:UniProtKB/Swiss-Prot;Acc:Q43348]
GRMZM2G041127	hb54	GRMZM2G059502	---	0.370783	-1	---	---
GRMZM2G041127	hb54	GRMZM2G144581	sweet4b	0.365512	---	Uncharacterized protein [Source:UniProtKB/TrEMBL;Acc:C0P438]	Bidirectional sugar transporter SWEET6 [Source:UniProtKB/Swiss-Prot;Acc:Q9C9M9]
GRMZM2G041127	hb54	AC205471.4_FG007	---	0.364795	---	Uncharacterized protein [Source:UniProtKB/TrEMBL;Acc:K7V5B7]	Protein of unknown function, DUF584 [Source:TAIR;Acc:AT2G34340]
GRMZM2G041127	hb54	GRMZM2G084181	---	0.363403	---		ABC transporter C family member 11 [Source:UniProtKB/Swiss-Prot;Acc:Q9C8H1]
GRMZM2G041127	hb54	GRMZM2G133684	---	0.35682	---	Uncharacterized protein [Source:UniProtKB/TrEMBL;Acc:B4FCL4]	Integral membrane HPP family protein [Source:TAIR;Acc:AT5G62720]
GRMZM2G041127	hb54	GRMZM2G703783	---	0.354357	-1	---	---
GRMZM2G041127	hb54	GRMZM2G113967	---	0.354349	---	CBL-interacting serine/threonine-protein kinase 15; Putative CBL-interacting protein kinase family protein; Uncharacterized protein [Source:UniProtKB/TrEMBL;Acc:B4FXZ1]	CBL-interacting serine/threonine-protein kinase 15 [Source:UniProtKB/Swiss-Prot;Acc:P92937]
GRMZM2G041127	hb54	GRMZM2G042040	---	0.346738	---	Uncharacterized protein [Source:UniProtKB/TrEMBL;Acc:B4FJY1]	microsomal glutathione s-transferase, putative [Source:TAIR;Acc:AT1G65820]
GRMZM2G041127	hb54	GRMZM2G471517	---	0.346067	---	---	---
GRMZM2G041127	hb54	GRMZM2G112830	trpp6	0.345513	---	---	---
GRMZM2G041127	hb54	GRMZM2G039841	---	0.344041	---		proline-rich family protein [Source:TAIR;Acc:AT5G07020]
GRMZM2G041127	hb54	GRMZM2G068955	---	0.34343	---	Uncharacterized protein [Source:UniProtKB/TrEMBL;Acc:K7UA28]	Protein of unknown function (DUF3537) [Source:TAIR;Acc:AT1G67570]
GRMZM2G041127	hb54	GRMZM2G568636	nnr1	0.339863	---	Nitrate reductase [NADH] [Source:UniProtKB/Swiss-Prot;Acc:P17571]	Nitrate reductase [NADH] 1 [Source:UniProtKB/Swiss-Prot;Acc:P11832]
GRMZM2G041127	hb54	GRMZM2G141216	---	0.339154	---	---	---
GRMZM2G041127	hb54	GRMZM2G065928	abh4	0.338744	---	Uncharacterized protein [Source:UniProtKB/TrEMBL;Acc:B4F9T8]	Abscisic acid 8'-hydroxylase 4 [Source:UniProtKB/Swiss-Prot;Acc:Q9LJK2]
GRMZM2G041127	hb54	GRMZM2G100058	---	0.337273	---	---	---
GRMZM2G041127	hb54	GRMZM2G013430	sat2	0.33561	---	Uncharacterized protein [Source:UniProtKB/TrEMBL;Acc:B4FLW0]	Serine acetyltransferase 1, chloroplastic [Source:UniProtKB/Swiss-Prot;Acc:Q42588]
GRMZM2G041127	hb54	GRMZM2G106795	---	0.334365	1	ADP-ribosylation factor; Uncharacterized protein [Source:UniProtKB/TrEMBL;Acc:B6TS42]	ADP-ribosylation factor B1C [Source:TAIR;Acc:AT3G03120]
GRMZM2G041127	hb54	GRMZM2G114153	---	0.334145	---	FIP1 [Source:UniProtKB/TrEMBL;Acc:B6SU92]	GEM-like protein 4 [Source:UniProtKB/Swiss-Prot;Acc:Q9FTA0]
GRMZM2G041127	hb54	GRMZM2G137329	umc1177	0.333226	-1	Nonspecific lipid-transfer protein [Source:UniProtKB/TrEMBL;Acc:B6SP11]	Bifunctional inhibitor/lipid-transfer protein/seed storage 2S albumin superfamily protein [Source:TAIR;Acc:AT3G57310]
GRMZM2G041127	hb54	GRMZM2G037265	---	0.325932	---	Uncharacterized protein [Source:UniProtKB/TrEMBL;Acc:B8A2Z1]	Probable galactinol--sucrose galactosyltransferase 1 [Source:UniProtKB/Swiss-Prot;Acc:Q84VX0]
GRMZM2G041127	hb54	GRMZM2G035557	---	0.325536	-1	Uncharacterized protein [Source:UniProtKB/TrEMBL;Acc:B4FA79]	Calcium-binding EF hand family protein [Source:TAIR;Acc:AT1G54530]
GRMZM2G041127	hb54	GRMZM2G319187	crr4	0.32362	---	Uncharacterized protein [Source:UniProtKB/TrEMBL;Acc:B8A3H8]	Two-component response regulator ARR8 [Source:UniProtKB/Swiss-Prot;Acc:O80365]
GRMZM2G041127	hb54	GRMZM2G018375	thi1	0.321691	---	Thiamine thiazole synthase 1, chloroplastic [Source:UniProtKB/Swiss-Prot;Acc:Q41738]	Thiamine thiazole synthase, chloroplastic [Source:UniProtKB/Swiss-Prot;Acc:Q38814]
GRMZM2G041127	hb54	GRMZM2G104843	ts1	0.316175	---	Lipoxygenase [Source:UniProtKB/TrEMBL;Acc:A1XCI3]	Lipoxygenase 4, chloroplastic [Source:UniProtKB/Swiss-Prot;Acc:Q9FNX8]
GRMZM2G041127	hb54	GRMZM2G105604	sum1	0.312679	---	Uncharacterized protein [Source:UniProtKB/TrEMBL;Acc:B4F7W3]	urophorphyrin methylase 1 [Source:TAIR;Acc:AT5G40850]
GRMZM2G041127	hb54	GRMZM2G131969	---	0.301757	-1	Uncharacterized protein [Source:UniProtKB/TrEMBL;Acc:B4FT03]	Endosomal targeting BRO1-like domain-containing protein [Source:TAIR;Acc:AT1G17940]
GRMZM2G041127	hb54	GRMZM2G374302	AY110562	0.299776	---	---	---
GRMZM2G041127	hb54	GRMZM2G352618	---	0.296865	---	Uncharacterized protein [Source:UniProtKB/TrEMBL;Acc:K7UI66]	unknown protein; BEST Arabidopsis thaliana protein match is: unknown protein (TAIR:AT3G15630.1); Has 61 Blast hits to 61 proteins in 13 species: Archae - 0; Bacteria - 0; Metazoa - 0; Fungi - 0; Plants - 61; Viruses - 0; Other Eukaryotes - 0 (source /.../ BLink). [Source:TAIR;Acc:AT1G52720]
GRMZM2G041127	hb54	GRMZM2G119705	rip2	0.295732	---	---	---
GRMZM2G041127	hb54	GRMZM2G126900	---	0.288095	-1	Uncharacterized protein [Source:UniProtKB/TrEMBL;Acc:B4FA10]	Inositol oxygenase 1 [Source:UniProtKB/Swiss-Prot;Acc:Q8L799]
GRMZM2G041127	hb54	GRMZM2G101125	---	0.285847	---	Uncharacterized protein [Source:UniProtKB/TrEMBL;Acc:B4FZR5]	Transmembrane amino acid transporter family protein [Source:TAIR;Acc:AT2G41190]
GRMZM2G041127	hb54	GRMZM2G150697	---	0.284726	---	Uncharacterized protein [Source:UniProtKB/TrEMBL;Acc:B6UB08]	unknown protein; BEST Arabidopsis thaliana protein match is: unknown protein (TAIR:AT4G18692.1); Has 42 Blast hits to 42 proteins in 10 species: Archae - 0; Bacteria - 0; Metazoa - 0; Fungi - 0; Plants - 42; Viruses - 0; Other Eukaryotes - 0 (source /.../ BLink). [Source:TAIR;Acc:AT3G53630]
GRMZM2G041127	hb54	GRMZM5G871336	---	0.284262	---	Putative uncharacterized protein [Source:UniProtKB/TrEMBL;Acc:B6T421]	unknown protein; FUNCTIONS IN: molecular_function unknown; INVOLVED IN: biological_process unknown; LOCATED IN: nucleus; EXPRESSED IN: 24 plant structures; EXPRESSED DURING: 15 growth stages; Has 30201 Blast hits to 17322 proteins in 780 species: Ar /.../ 12; Bacteria - 1396; Metazoa - 17338; Fungi - 3422; Plants - 5037; Viruses - 0; Other Eukaryotes - 2996 (source: NCBI BLink). [Source:TAIR;Acc:…
GRMZM2G041127	hb54	GRMZM2G399284	---	0.278527	---	Uncharacterized protein [Source:UniProtKB/TrEMBL;Acc:B4FKC1]	20 kDa chaperonin, chloroplastic [Source:UniProtKB/Swiss-Prot;Acc:O65282]
GRMZM2G041127	hb54	GRMZM2G353444	---	0.27514	---		Phospholipase A1-Igamma1, chloroplastic [Source:UniProtKB/Swiss-Prot;Acc:Q941F1]
GRMZM2G041127	hb54	GRMZM2G081322	---	0.273263	---		Villin-3 [Source:UniProtKB/Swiss-Prot;Acc:O81645]
GRMZM2G041127	hb54	GRMZM2G028665	---	0.271792	---	Uncharacterized protein [Source:UniProtKB/TrEMBL;Acc:B8A1Y4]	Bifunctional nuclease 2 [Source:UniProtKB/Swiss-Prot;Acc:Q93VH2]
GRMZM2G041127	hb54	GRMZM2G162640	---	0.268485	---	BTB/POZ domain-containing protein [Source:Projected from Arabidopsis thaliana (AT1G63850) TAIR;Acc:AT1G63850]	BTB/POZ domain-containing protein At1g63850 [Source:UniProtKB/Swiss-Prot;Acc:Q9CAJ9]
GRMZM2G041127	hb54	GRMZM2G092497	met3	0.267931	---	Putative DNA cytosine methyltransferase Zmet3 isoform 1; Putative DNA cytosine methyltransferase Zmet3 isoform 2; Putative DNA cytosine methyltransferase Zmet3 isoform 3; Uncharacterized protein [Source:UniProtKB/TrEMBL;Acc:C0HHZ5]	DNA (cytosine-5)-methyltransferase DRM1 [Source:UniProtKB/Swiss-Prot;Acc:Q9LXE5]
GRMZM2G041127	hb54	GRMZM2G158835	rnp1	0.265623	---	Uncharacterized protein [Source:UniProtKB/TrEMBL;Acc:B4G1V3]	RNA-binding protein CP29B, chloroplastic [Source:UniProtKB/Swiss-Prot;Acc:Q9ZUU4]
GRMZM2G041127	hb54	GRMZM2G107984	---	0.265186	---	Uncharacterized protein [Source:UniProtKB/TrEMBL;Acc:C0P7U9]	DEAD-box ATP-dependent RNA helicase 53 [Source:UniProtKB/Swiss-Prot;Acc:Q9LUW5]
GRMZM2G041127	hb54	GRMZM2G323888	---	0.263873	1	Uncharacterized protein [Source:UniProtKB/TrEMBL;Acc:K7VH98]	unknown protein; BEST Arabidopsis thaliana protein match is: unknown protein (TAIR:AT3G15630.1); Has 61 Blast hits to 61 proteins in 13 species: Archae - 0; Bacteria - 0; Metazoa - 0; Fungi - 0; Plants - 61; Viruses - 0; Other Eukaryotes - 0 (source /.../ BLink). [Source:TAIR;Acc:AT1G52720]
GRMZM2G041127	hb54	GRMZM2G110504	---	0.263799	---	Uncharacterized protein [Source:UniProtKB/TrEMBL;Acc:B4G1V7]	nodulin-related protein 1 [Source:TAIR;Acc:AT2G03440]
GRMZM2G041127	hb54	GRMZM2G467184	---	0.259964	---	Uncharacterized protein [Source:UniProtKB/TrEMBL;Acc:C4J039]	Probable calcium-binding protein CML35 [Source:UniProtKB/Swiss-Prot;Acc:P30188]
GRMZM2G041127	hb54	GRMZM2G077299	---	0.249452	---	Putative alpha-L-arabinofuranosidase family protein [Source:UniProtKB/TrEMBL;Acc:K7U6T4]	Alpha-L-arabinofuranosidase 1 [Source:UniProtKB/Swiss-Prot;Acc:Q9SG80]
GRMZM2G041127	hb54	GRMZM2G035421	---	0.245831	---	Putative phospholipase, patatin family protein [Source:UniProtKB/TrEMBL;Acc:K7V4Q1]	Triacylglycerol lipase SDP1 [Source:UniProtKB/Swiss-Prot;Acc:Q9LZA6]
GRMZM2G041127	hb54	GRMZM2G047995	---	0.244523	---	Uncharacterized protein [Source:UniProtKB/TrEMBL;Acc:B4FYV7]	alpha/beta-Hydrolases superfamily protein [Source:TAIR;Acc:AT5G18630]
GRMZM2G041127	hb54	GRMZM2G149704	---	0.238875	---	Uncharacterized protein [Source:UniProtKB/TrEMBL;Acc:K7V7E2]	Protein SGT1 homolog B [Source:UniProtKB/Swiss-Prot;Acc:Q9SUT5]
GRMZM2G041127	hb54	GRMZM2G415793	---	0.236972	---	Allene oxide cyclase 4; Uncharacterized protein [Source:UniProtKB/TrEMBL;Acc:B4FUX0]	Allene oxide cyclase 1, chloroplastic [Source:UniProtKB/Swiss-Prot;Acc:Q9LS03]
GRMZM2G041127	hb54	GRMZM2G137569	---	0.235597	---	Putative CBL-interacting protein kinase family protein [Source:UniProtKB/TrEMBL;Acc:K7UFM9]	CBL-interacting serine/threonine-protein kinase 24 [Source:UniProtKB/Swiss-Prot;Acc:Q9LDI3]
GRMZM2G041127	hb54	GRMZM2G074097	thi2	0.232583	1	Thiamine thiazole synthase 2, chloroplastic [Source:UniProtKB/Swiss-Prot;Acc:Q41739]	Thiamine thiazole synthase, chloroplastic [Source:UniProtKB/Swiss-Prot;Acc:Q38814]
GRMZM2G041127	hb54	GRMZM2G155911	---	0.231592	---	Anthocyanidin 3-O-glucosyltransferase [Source:UniProtKB/TrEMBL;Acc:B6T3B8]	UDP-glycosyltransferase 71C4 [Source:UniProtKB/Swiss-Prot;Acc:Q9LML6]
GRMZM2G041127	hb54	GRMZM2G423917	---	0.230466	---	Src2-like protein [Source:UniProtKB/TrEMBL;Acc:K7V9Q6]	soybean gene regulated by cold-2 [Source:TAIR;Acc:AT1G09070]
GRMZM2G041127	hb54	GRMZM2G102183	mas1	0.224159	---	Malate synthase, glyoxysomal [Source:UniProtKB/Swiss-Prot;Acc:P49081]	Malate synthase [Source:UniProtKB/Swiss-Prot;Acc:Q9LZC3]
GRMZM2G041127	hb54	GRMZM2G069018	---	0.22114	---	---	---
GRMZM2G041127	hb54	GRMZM2G052569	---	0.218093	---	Uncharacterized protein [Source:UniProtKB/TrEMBL;Acc:C0P576]	UBP1-associated proteins 1B [Source:UniProtKB/Swiss-Prot;Acc:Q9SHZ5]
GRMZM2G041127	hb54	GRMZM2G005939	---	0.217863	---	Putative HLH DNA-binding domain superfamily protein isoform 1; Putative HLH DNA-binding domain superfamily protein isoform 2; Uncharacterized protein [Source:UniProtKB/TrEMBL;Acc:B4FSI9]	basic helix-loop-helix (bHLH) DNA-binding superfamily protein [Source:TAIR;Acc:AT2G31730]
GRMZM2G041127	hb54	GRMZM2G130764	---	0.213804	---	Uncharacterized protein [Source:UniProtKB/TrEMBL;Acc:C4IZV8]	Calcium uniporter protein 6, mitochondrial [Source:UniProtKB/Swiss-Prot;Acc:F4I111]
GRMZM2G041127	hb54	GRMZM2G126682	---	0.21286	---	24-methylenesterol C-methyltransferase 2; Uncharacterized protein [Source:UniProtKB/TrEMBL;Acc:C0HFI1]	24-methylenesterol C-methyltransferase 3 [Source:UniProtKB/Swiss-Prot;Acc:Q94JS4]
GRMZM2G041127	hb54	GRMZM2G374088	---	0.212345	---	---	---
GRMZM2G041127	hb54	GRMZM2G071771	---	0.208774	---	PVR3-like protein [Source:UniProtKB/TrEMBL;Acc:B6SXH7]	Bifunctional inhibitor/lipid-transfer protein/seed storage 2S albumin superfamily protein [Source:TAIR;Acc:AT5G48490]
GRMZM2G041127	hb54	GRMZM2G018070	---	0.205745	-1	RING-H2 finger protein [Source:UniProtKB/TrEMBL;Acc:B6SUW5]	Probable E3 ubiquitin-protein ligase XERICO [Source:UniProtKB/Swiss-Prot;Acc:Q9SI09]
GRMZM2G041127	hb54	GRMZM2G179462	pmpm4	0.198829	---	Putative uncharacterized protein [Source:UniProtKB/TrEMBL;Acc:B6SPH7]	UPF0057 membrane protein At1g57550 [Source:UniProtKB/Swiss-Prot;Acc:Q9FE70]
GRMZM2G041127	hb54	GRMZM2G136964	---	0.101061	---	---	---
GRMZM2G071907	wrky50	GRMZM2G382774	---	0.51164	---	---	---
GRMZM2G071907	wrky50	GRMZM2G080375	---	0.472834	---	Uncharacterized protein [Source:UniProtKB/TrEMBL;Acc:K7UQZ2]	ATP-dependent 6-phosphofructokinase 3 [Source:UniProtKB/Swiss-Prot;Acc:Q94AA4]
GRMZM2G071907	wrky50	GRMZM2G133189	---	0.45818	---	---	---
GRMZM2G071907	wrky50	GRMZM2G169372	dhn13	0.432759	---	---	---
GRMZM2G071907	wrky50	GRMZM2G075712	---	0.421828	---	---	---
GRMZM2G071907	wrky50	GRMZM2G048129	---	0.409914	---	MtN19-like protein [Source:UniProtKB/TrEMBL;Acc:B6SZN0]	FUNCTIONS IN: molecular_function unknown; INVOLVED IN: biological_process unknown; LOCATED IN: vacuole; EXPRESSED IN: 24 plant structures; EXPRESSED DURING: 15 growth stages; CONTAINS InterPro DOMAIN/s: Stress up-regulated Nod 19 (InterPro:IPR011692 /.../ 30201 Blast hits to 17322 proteins in 780 species: Archae - 12; Bacteria - 1396; Metazoa - 17338; Fungi - 3422; Plants - 5037; Viruses - 0; Oth…
GRMZM2G071907	wrky50	GRMZM2G104876	---	0.40982	---	---	---
GRMZM2G071907	wrky50	GRMZM2G377904	---	0.403359	---		Probable protein phosphatase 2C 63 [Source:UniProtKB/Swiss-Prot;Acc:O81760]
GRMZM2G071907	wrky50	GRMZM2G132958	---	0.40182	---	Uncharacterized protein [Source:UniProtKB/TrEMBL;Acc:B4FXK5]	Regulator of Vps4 activity in the MVB pathway protein [Source:TAIR;Acc:AT1G13340]
GRMZM2G071907	wrky50	GRMZM2G047384	---	0.397926	---	DNA-3-methyladenine glycosylase I; Uncharacterized protein [Source:UniProtKB/TrEMBL;Acc:B4FWT0]	DNA glycosylase superfamily protein [Source:TAIR;Acc:AT3G12710]
GRMZM2G071907	wrky50	GRMZM2G035305	---	0.397873	---	---	---
GRMZM2G071907	wrky50	GRMZM2G074053	---	0.395536	---	Uncharacterized protein [Source:UniProtKB/TrEMBL;Acc:B4G0G5]	Amino acid transporter ANTL2 [Source:UniProtKB/Swiss-Prot;Acc:Q9SVG0]
GRMZM2G071907	wrky50	GRMZM2G161299	mcf1	0.392838	---	Mitochondrial substrate carrier family protein [Source:Projected from Arabidopsis thaliana (AT4G26180) TAIR;Acc:AT4G26180]	Mitochondrial substrate carrier family protein [Source:TAIR;Acc:AT4G26180]
GRMZM2G071907	wrky50	GRMZM2G009465	csu1138	0.391347	---	Proline-rich protein; Uncharacterized protein [Source:UniProtKB/TrEMBL;Acc:Q9SBX4]	Proline-rich protein 2 [Source:UniProtKB/Swiss-Prot;Acc:Q9SKP9]
GRMZM2G071907	wrky50	GRMZM2G010363	---	0.390622	---	Uncharacterized protein [Source:UniProtKB/TrEMBL;Acc:B4FJW6]	Sec14p-like phosphatidylinositol transfer family protein [Source:TAIR;Acc:AT1G55840]
GRMZM2G071907	wrky50	GRMZM2G359102	---	0.387223	---	---	---
GRMZM2G071907	wrky50	GRMZM2G154093	---	0.387174	---	homogentisate 1,2-dioxygenase [Source:Projected from Arabidopsis thaliana (AT5G54080) TAIR;Acc:AT5G54080]	Homogentisate 1,2-dioxygenase [Source:UniProtKB/Swiss-Prot;Acc:Q9ZRA2]
GRMZM2G071907	wrky50	GRMZM2G084717	---	0.383643	---	---	---
GRMZM2G071907	wrky50	GRMZM2G037431	---	0.38199	---	Polygalacturonase [Source:UniProtKB/TrEMBL;Acc:B6TUZ2]	Pectin lyase-like superfamily protein [Source:TAIR;Acc:AT1G60590]
GRMZM2G071907	wrky50	GRMZM2G105253	---	0.381604	---	Uncharacterized protein [Source:UniProtKB/TrEMBL;Acc:B4FI40]	Rop guanine nucleotide exchange factor 1 [Source:UniProtKB/Swiss-Prot;Acc:Q93ZY2]
GRMZM2G071907	wrky50	GRMZM2G005562	---	0.378983	-1	Pectin lyase-like superfamily protein [Source:Projected from Arabidopsis thaliana (AT3G55140) TAIR;Acc:AT3G55140]	Pectin lyase-like superfamily protein [Source:TAIR;Acc:AT3G55140]
GRMZM2G071907	wrky50	GRMZM2G123159	sgb102	0.377761	---	N-acetyltransferase 5; Silencing group B protein [Source:UniProtKB/TrEMBL;Acc:Q94F75]	Acyl-CoA N-acyltransferases (NAT) superfamily protein [Source:TAIR;Acc:AT1G03150]
GRMZM2G071907	wrky50	GRMZM2G086389	---	0.375925	---	Uncharacterized protein [Source:UniProtKB/TrEMBL;Acc:B4F8N8]	Potassium transporter 9 [Source:UniProtKB/Swiss-Prot;Acc:O49423]
GRMZM2G071907	wrky50	GRMZM2G072584	---	0.374976	-1	Protein kinase superfamily protein [Source:Projected from Arabidopsis thaliana (AT5G01850) TAIR;Acc:AT5G01850]	Protein kinase superfamily protein [Source:TAIR;Acc:AT5G01850]
GRMZM2G071907	wrky50	GRMZM2G425249	---	0.37243	---	Choline/ethanolamine kinase; Uncharacterized protein [Source:UniProtKB/TrEMBL;Acc:B6U018]	Probable choline kinase 2 [Source:UniProtKB/Swiss-Prot;Acc:Q8L518]
GRMZM2G071907	wrky50	GRMZM2G137321	---	0.371561	---		P-loop containing nucleoside triphosphate hydrolases superfamily protein [Source:TAIR;Acc:AT3G28580]
GRMZM2G071907	wrky50	GRMZM2G053987	mpk1	0.370874	---	Putative MAP kinase family protein isoform 1; Putative MAP kinase family protein isoform 2; Uncharacterized protein [Source:UniProtKB/TrEMBL;Acc:B4FG60]	Mitogen-activated protein kinase 3 [Source:UniProtKB/Swiss-Prot;Acc:Q39023]
GRMZM2G071907	wrky50	GRMZM2G142315	---	0.370269	---	Phosphatidylinositol transfer protein CSR1 [Source:UniProtKB/TrEMBL;Acc:B6T7Q2]	Sec14p-like phosphatidylinositol transfer family protein [Source:TAIR;Acc:AT1G01630]
GRMZM2G071907	wrky50	GRMZM2G135588	---	0.369188	---	Putative uncharacterized protein [Source:UniProtKB/TrEMBL;Acc:B6SPN1]	Citrate synthase 1, peroxisomal [Source:UniProtKB/Swiss-Prot;Acc:Q9LXS7]
GRMZM2G071907	wrky50	GRMZM2G126010	act1	0.365615	1	Actin-1 [Source:UniProtKB/Swiss-Prot;Acc:P02582]	Actin-2 [Source:UniProtKB/Swiss-Prot;Acc:Q96292]
GRMZM2G071907	wrky50	GRMZM2G175269	---	0.363072	---	Uncharacterized protein [Source:UniProtKB/TrEMBL;Acc:K7U4Z4]	DNA glycosylase superfamily protein [Source:TAIR;Acc:AT1G80850]
GRMZM2G071907	wrky50	GRMZM2G106703	---	0.362883	---	Uncharacterized protein [Source:UniProtKB/TrEMBL;Acc:C4JC45]	Mitochondrial carrier protein MTM1 [Source:UniProtKB/Swiss-Prot;Acc:Q944H5]
GRMZM2G071907	wrky50	GRMZM2G169089	ln1	0.360659	---	O-acyltransferase [Source:UniProtKB/TrEMBL;Acc:K7VF18]	Diacylglycerol O-acyltransferase 1 [Source:UniProtKB/Swiss-Prot;Acc:Q9SLD2]
GRMZM2G071907	wrky50	GRMZM2G057113	---	0.350634	---	Uncharacterized protein [Source:UniProtKB/TrEMBL;Acc:C0PFW2]	S-adenosyl-L-methionine-dependent methyltransferases superfamily protein [Source:TAIR;Acc:AT2G43320]
GRMZM2G071907	wrky50	GRMZM2G152059	---	0.347511	---	---	---
GRMZM2G071907	wrky50	GRMZM2G072529	acco31	0.346698	1	Acc oxidase [Source:UniProtKB/TrEMBL;Acc:Q6JN55]	1-aminocyclopropane-1-carboxylate oxidase 5 [Source:UniProtKB/Swiss-Prot;Acc:Q0WPW4]
GRMZM2G071907	wrky50	GRMZM2G038636	ccp2	0.345881	---	Cysteine proteinase 2 [Source:UniProtKB/Swiss-Prot;Acc:Q10717]	Thiol protease aleurain-like [Source:UniProtKB/Swiss-Prot;Acc:Q8RWQ9]
GRMZM2G071907	wrky50	GRMZM2G130943	---	0.345842	---	Uncharacterized protein [Source:UniProtKB/TrEMBL;Acc:B4F936]	Probable protein phosphatase 2C 63 [Source:UniProtKB/Swiss-Prot;Acc:O81760]
GRMZM2G071907	wrky50	GRMZM2G111224	---	0.344492	---		LOCATED IN: plasma membrane; EXPRESSED IN: 23 plant structures; EXPRESSED DURING: 13 growth stages; CONTAINS InterPro DOMAIN/s: von Willebrand factor, type A (InterPro:IPR002035); BEST Arabidopsis thaliana protein match is: inter-alpha-trypsin inhib /.../eavy chain-related (TAIR:AT1G19110.1); Has 1407 Blast hits to 1406 proteins in 307 species: Archae - 6; Bacteria - 522; Metazoa - 484; Fungi - 5…
GRMZM2G071907	wrky50	GRMZM2G087259	---	0.342955	---	---	---
GRMZM2G071907	wrky50	GRMZM2G051750	---	0.341272	---	---	---
GRMZM2G071907	wrky50	GRMZM2G146337	---	0.33615	---	Uncharacterized protein [Source:UniProtKB/TrEMBL;Acc:K7TZH3]	Probable purine permease 7 [Source:UniProtKB/Swiss-Prot;Acc:Q2V3H2]
GRMZM2G071907	wrky50	GRMZM2G150014	---	0.335738	---	Adenylate kinase; Uncharacterized protein [Source:UniProtKB/TrEMBL;Acc:C0PCK6]	Probable adenylate kinase 6, chloroplastic [Source:UniProtKB/Swiss-Prot;Acc:Q84JF7]
GRMZM2G071907	wrky50	GRMZM2G147430	---	0.331659	---		Phosphoribulokinase / Uridine kinase family [Source:TAIR;Acc:AT1G73980]
GRMZM2G071907	wrky50	GRMZM2G098058	---	0.327542	---	Uncharacterized protein [Source:UniProtKB/TrEMBL;Acc:B4FW38]	Chaperone DnaJ-domain superfamily protein [Source:TAIR;Acc:AT3G14200]
GRMZM2G071907	wrky50	GRMZM2G080567	---	0.326299	-1	Putative uncharacterized protein [Source:UniProtKB/TrEMBL;Acc:B6TDN3]	Protein of unknown function (DUF1677) [Source:TAIR;Acc:AT1G72510]
GRMZM2G071907	wrky50	GRMZM2G150367	---	0.326141	---	Stress protein; Stress-related protein [Source:UniProtKB/TrEMBL;Acc:B6TIK3]	REF/SRPP-like protein At2g47780 [Source:UniProtKB/Swiss-Prot;Acc:O82246]
GRMZM2G071907	wrky50	AC209898.2_FG004	---	0.3239	---	---	---
GRMZM2G071907	wrky50	GRMZM2G382035	---	0.322321	---	---	---
GRMZM2G071907	wrky50	GRMZM2G037422	---	0.314389	---	---	---
GRMZM2G071907	wrky50	GRMZM2G379428	---	0.313272	---	---	---
GRMZM2G071907	wrky50	GRMZM2G153523	---	0.311797	---	Uncharacterized protein [Source:UniProtKB/TrEMBL;Acc:C0P7K5]	Eukaryotic aspartyl protease family protein [Source:TAIR;Acc:AT2G42980]
GRMZM2G071907	wrky50	GRMZM2G144153	---	0.310103	---	Glutathione peroxidase [Source:UniProtKB/TrEMBL;Acc:Q6JAH6]	Probable glutathione peroxidase 8 [Source:UniProtKB/Swiss-Prot;Acc:Q8LBU2]
GRMZM2G071907	wrky50	GRMZM2G132712	---	0.303224	---	Uncharacterized protein [Source:UniProtKB/TrEMBL;Acc:C0PEP3]	Calcium-transporting ATPase 8, plasma membrane-type [Source:UniProtKB/Swiss-Prot;Acc:Q9LF79]
GRMZM2G071907	wrky50	GRMZM2G077088	---	0.301742	---	SWIb domain-containing protein [Source:UniProtKB/TrEMBL;Acc:B6TTM2]	SWIB/MDM2 domain superfamily protein [Source:TAIR;Acc:AT2G14880]
GRMZM2G071907	wrky50	GRMZM5G829946	---	0.300916	---	Uncharacterized protein [Source:UniProtKB/TrEMBL;Acc:C0HFH2]	Glycerophosphodiester phosphodiesterase GDPD2 [Source:UniProtKB/Swiss-Prot;Acc:Q9FLM1]
GRMZM2G071907	wrky50	GRMZM2G174807	pip1a	0.300769	---	---	---
GRMZM2G071907	wrky50	GRMZM2G180716	---	0.300641	-1	---	---
GRMZM2G071907	wrky50	GRMZM2G350225	---	0.296643	---		CBS domain-containing protein [Source:TAIR;Acc:AT5G53750]
GRMZM2G071907	wrky50	GRMZM2G450424	---	0.295899	---	Protein YIF1A isoform 1; Protein YIF1A isoform 2; Uncharacterized protein [Source:UniProtKB/TrEMBL;Acc:B4FPP0]	Integral membrane HRF1 family protein [Source:TAIR;Acc:AT3G59500]
GRMZM2G071907	wrky50	GRMZM2G032190	---	0.293533	---	Uncharacterized protein [Source:UniProtKB/TrEMBL;Acc:B4F7Y2]	copper ion binding [Source:TAIR;Acc:AT4G32610]
GRMZM2G071907	wrky50	GRMZM2G087144	---	0.290265	---		Ypt/Rab-GAP domain of gyp1p superfamily protein [Source:TAIR;Acc:AT5G24390]
GRMZM2G071907	wrky50	GRMZM2G147014	---	0.289832	---	---	---
GRMZM2G071907	wrky50	GRMZM2G160430	---	0.283537	---	Uncharacterized protein [Source:UniProtKB/TrEMBL;Acc:K7URW6]	Sugar transporter ERD6-like 6 [Source:UniProtKB/Swiss-Prot;Acc:Q9FRL3]
GRMZM2G071907	wrky50	GRMZM2G164141	---	0.278003	---	Uricase [Source:UniProtKB/TrEMBL;Acc:B4FFW7]	Uricase [Source:UniProtKB/Swiss-Prot;Acc:O04420]
GRMZM2G071907	wrky50	AC213654.3_FG001	---	0.271814	---	Uncharacterized protein [Source:UniProtKB/TrEMBL;Acc:B4FHZ7]	RING/U-box superfamily protein [Source:TAIR;Acc:AT3G10815]
GRMZM2G071907	wrky50	GRMZM2G108849	---	0.271592	-1	Cathepsin B-like cysteine proteinase 3 [Source:UniProtKB/TrEMBL;Acc:B6TLR9]	Cysteine proteinases superfamily protein [Source:TAIR;Acc:AT1G02305]
GRMZM2G071907	wrky50	GRMZM2G056014	cap1	0.26417	---	Calcium pump1 [Source:UniProtKB/TrEMBL;Acc:K7V5W7]	Calcium-transporting ATPase 4, endoplasmic reticulum-type [Source:UniProtKB/Swiss-Prot;Acc:Q9XES1]
GRMZM2G071907	wrky50	GRMZM2G078887	---	0.256024	---	---	---
GRMZM2G071907	wrky50	GRMZM2G019039	---	0.236777	---	---	---
GRMZM2G071907	wrky50	GRMZM2G567897	---	0.229968	---	Putative RING zinc finger domain superfamily protein [Source:UniProtKB/TrEMBL;Acc:K7VAR9]	zinc finger (C3HC4-type RING finger) family protein [Source:TAIR;Acc:AT3G46620]
GRMZM2G071907	wrky50	GRMZM2G022679	ga2ox3	0.205982	---		Gibberellin 2-beta-dioxygenase 3 [Source:UniProtKB/Swiss-Prot;Acc:O64692]
GRMZM2G071907	wrky50	GRMZM2G070375	---	0.124633	---	FIP1 [Source:UniProtKB/TrEMBL;Acc:B6TYS0]	GRAM domain family protein [Source:TAIR;Acc:AT4G40100]
GRMZM2G071907	wrky50	GRMZM2G074735	---	0.110369	---	GTPase activating protein; Putative calcium-dependent lipid-binding (CaLB domain) family protein [Source:UniProtKB/TrEMBL;Acc:B6U886]	Calcium-dependent lipid-binding (CaLB domain) family protein [Source:TAIR;Acc:AT2G01540]
GRMZM2G127537	hb11	GRMZM2G142093	---	0.300792	-1	---	---
GRMZM2G127537	hb11	GRMZM2G304712	---	0.289774	-1	Limonoid UDP-glucosyltransferase [Source:UniProtKB/TrEMBL;Acc:K7URK6]	UDP-glycosyltransferase 84A1 [Source:UniProtKB/Swiss-Prot;Acc:Q5XF20]
GRMZM2G127537	hb11	GRMZM2G006377	---	0.284416	---	xylem bark cysteine peptidase 3 [Source:Projected from Arabidopsis thaliana (AT1G09850) TAIR;Acc:AT1G09850]	xylem bark cysteine peptidase 3 [Source:TAIR;Acc:AT1G09850]
GRMZM2G127537	hb11	GRMZM2G022926	---	0.28268	-1	Uncharacterized protein [Source:UniProtKB/TrEMBL;Acc:B6T947]	Uncharacterized conserved protein (DUF2358) [Source:TAIR;Acc:AT1G79510]
GRMZM2G127537	hb11	GRMZM2G073310	---	0.280212	---	Uncharacterized protein [Source:UniProtKB/TrEMBL;Acc:K7UT48]	U-box domain-containing protein 29 [Source:UniProtKB/Swiss-Prot;Acc:Q9LSA6]
GRMZM2G127537	hb11	GRMZM2G111477	cpn1	0.270937	---		Chaperonin CPN60-like 1, mitochondrial [Source:UniProtKB/Swiss-Prot;Acc:Q8L7B5]
GRMZM2G127537	hb11	GRMZM2G005954	zim13	0.266004	-1	TIFY transcription factor; Uncharacterized protein [Source:UniProtKB/TrEMBL;Acc:B4F860]	Protein TIFY 11A [Source:UniProtKB/Swiss-Prot;Acc:Q9LDU5]
GRMZM2G127537	hb11	GRMZM2G112830	trpp6	0.264954	---	---	---
GRMZM2G127537	hb11	GRMZM2G459391	---	0.259803	-1	ATP-dependent Clp protease adaptor protein ClpS containing protein; Uncharacterized protein [Source:UniProtKB/TrEMBL;Acc:B4FRY9]	Ribosomal protein L12/ ATP-dependent Clp protease adaptor protein ClpS family protein [Source:TAIR;Acc:AT1G68660]
GRMZM2G127537	hb11	GRMZM2G137329	umc1177	0.253735	-1	Nonspecific lipid-transfer protein [Source:UniProtKB/TrEMBL;Acc:B6SP11]	Bifunctional inhibitor/lipid-transfer protein/seed storage 2S albumin superfamily protein [Source:TAIR;Acc:AT3G57310]
GRMZM2G127537	hb11	GRMZM2G112165	pza03529	0.251334	---	---	---
GRMZM2G127537	hb11	GRMZM2G028325	nip2a	0.247603	-1	---	---
GRMZM2G127537	hb11	GRMZM2G180430	dbptf2	0.246066	---	---	---
GRMZM2G127537	hb11	GRMZM2G060079	---	0.242617	---	Oxidoreductase, 2OG-Fe oxygenase family protein [Source:UniProtKB/TrEMBL;Acc:B6ST02]	oxidoreductase, 2OG-Fe(II) oxygenase family protein [Source:TAIR;Acc:AT4G02940]
GRMZM2G127537	hb11	GRMZM2G396553	---	0.24107	---	Arginine decarboxylase [Source:UniProtKB/TrEMBL;Acc:K7W734]	Arginine decarboxylase 1 [Source:UniProtKB/Swiss-Prot;Acc:Q9SI64]
GRMZM2G127537	hb11	GRMZM2G005939	---	0.238267	---	Putative HLH DNA-binding domain superfamily protein isoform 1; Putative HLH DNA-binding domain superfamily protein isoform 2; Uncharacterized protein [Source:UniProtKB/TrEMBL;Acc:B4FSI9]	basic helix-loop-helix (bHLH) DNA-binding superfamily protein [Source:TAIR;Acc:AT2G31730]
GRMZM2G127537	hb11	GRMZM2G025832	pr1	0.234723	---	Uncharacterized protein [Source:UniProtKB/TrEMBL;Acc:B4FV55]	Flavonoid 3'-monooxygenase [Source:UniProtKB/Swiss-Prot;Acc:Q9SD85]
GRMZM2G127537	hb11	GRMZM2G047002	---	0.232619	-1	Putative uncharacterized protein [Source:UniProtKB/TrEMBL;Acc:B6TXK5]	Tetratricopeptide repeat (TPR)-like superfamily protein [Source:TAIR;Acc:AT1G04530]
GRMZM2G127537	hb11	GRMZM2G024104	gln2	0.221614	-1	Glutamine synthetase root isozyme 2 [Source:UniProtKB/Swiss-Prot;Acc:P38560]	Glutamine synthetase cytosolic isozyme 1-2 [Source:UniProtKB/Swiss-Prot;Acc:Q8LCE1]
GRMZM2G127537	hb11	GRMZM2G374302	AY110562	0.210625	---	---	---
GRMZM2G127537	hb11	GRMZM2G039993	---	0.190403	1	---	---
GRMZM2G148333	ereb202	GRMZM2G335618	gst19	0.302939	1	Glutathione S-transferase GST 19; Uncharacterized protein [Source:UniProtKB/TrEMBL;Acc:B4FVJ9]	Glutathione S-transferase U27 [Source:UniProtKB/Swiss-Prot;Acc:Q9LZG7]
GRMZM2G148333	ereb202	GRMZM2G099049	---	0.278274	---	---	---
GRMZM2G148333	ereb202	GRMZM2G111579	gsh1	0.256819	---	Putative gamma-glutamylcysteine synthetase [Source:UniProtKB/TrEMBL;Acc:K7UAR5]	Glutamate--cysteine ligase, chloroplastic [Source:UniProtKB/Swiss-Prot;Acc:P46309]
GRMZM2G148333	ereb202	GRMZM2G352855	---	0.252637	-1	Uncharacterized protein [Source:UniProtKB/TrEMBL;Acc:B4FU03]	Lecithin-cholesterol acyltransferase-like 1 [Source:UniProtKB/Swiss-Prot;Acc:Q9FZI8]
GRMZM2G148333	ereb202	GRMZM2G135588	---	0.252068	---	Putative uncharacterized protein [Source:UniProtKB/TrEMBL;Acc:B6SPN1]	Citrate synthase 1, peroxisomal [Source:UniProtKB/Swiss-Prot;Acc:Q9LXS7]
GRMZM2G148333	ereb202	GRMZM2G004548	platz11	0.250936	---	Uncharacterized protein [Source:UniProtKB/TrEMBL;Acc:C4JA06]	PLATZ transcription factor family protein [Source:TAIR;Acc:AT4G17900]
GRMZM2G148333	ereb202	GRMZM2G090087	mis1	0.248129	---	aldehyde dehydrogenase 12A1 [Source:Projected from Arabidopsis thaliana (AT5G62530) TAIR;Acc:AT5G62530]	Delta-1-pyrroline-5-carboxylate dehydrogenase 12A1, mitochondrial [Source:UniProtKB/Swiss-Prot;Acc:Q8VZC3]
GRMZM2G148333	ereb202	GRMZM2G319781	---	0.245333	---	---	---
GRMZM2G148333	ereb202	GRMZM2G018070	---	0.230367	-1	RING-H2 finger protein [Source:UniProtKB/TrEMBL;Acc:B6SUW5]	Probable E3 ubiquitin-protein ligase XERICO [Source:UniProtKB/Swiss-Prot;Acc:Q9SI09]
GRMZM2G148333	ereb202	GRMZM2G137546	zar3	0.226531	---	---	---
GRMZM2G148333	ereb202	GRMZM2G152447	---	0.204274	---	Uncharacterized protein [Source:UniProtKB/TrEMBL;Acc:B4FM74]	Purple acid phosphatase 4 [Source:UniProtKB/Swiss-Prot;Acc:Q8VYU7]
GRMZM2G148333	ereb202	GRMZM2G133400	---	0.196753	---	Uncharacterized protein [Source:UniProtKB/TrEMBL;Acc:B4FCT5]	Uncharacterised protein family (UPF0114) [Source:TAIR;Acc:AT5G13720]
GRMZM2G148333	ereb202	GRMZM2G076212	---	0.097446	---	---	---
GRMZM2G162739	nactf5	GRMZM2G176506	---	0.543297	---	PAS/LOV protein B [Source:Projected from Arabidopsis thaliana (AT2G02710) TAIR;Acc:AT2G02710]	Protein TWIN LOV 1 [Source:UniProtKB/Swiss-Prot;Acc:O64511]
GRMZM2G162739	nactf5	GRMZM2G333049	---	0.534353	---	---	---
GRMZM2G162739	nactf5	GRMZM2G070138	---	0.494718	---	Protein CYPRO4 [Source:UniProtKB/TrEMBL;Acc:K7U5B0]	Vacuolar import/degradation, Vid27-related protein [Source:TAIR;Acc:AT3G19240]
GRMZM2G162739	nactf5	GRMZM2G099337	---	0.472406	---	Uncharacterized protein [Source:UniProtKB/TrEMBL;Acc:K7WBZ0]	RING/FYVE/PHD zinc finger superfamily protein [Source:TAIR;Acc:AT5G16680]
GRMZM2G162739	nactf5	GRMZM2G029951	---	0.44273	---	---	---
GRMZM2G162739	nactf5	GRMZM2G161299	mcf1	0.43526	---	Mitochondrial substrate carrier family protein [Source:Projected from Arabidopsis thaliana (AT4G26180) TAIR;Acc:AT4G26180]	Mitochondrial substrate carrier family protein [Source:TAIR;Acc:AT4G26180]
GRMZM2G162739	nactf5	GRMZM2G012453	---	0.424486	---		Probable pre-mRNA-splicing factor ATP-dependent RNA helicase [Source:UniProtKB/Swiss-Prot;Acc:Q38953]
GRMZM2G162739	nactf5	AC208201.3_FG002	---	0.422968	---	Protein phosphatase type 2-C; Uncharacterized protein [Source:UniProtKB/TrEMBL;Acc:A3F4K2]	Probable protein phosphatase 2C 25 [Source:UniProtKB/Swiss-Prot;Acc:O80871]
GRMZM2G162739	nactf5	GRMZM2G159700	---	0.418372	---	Uncharacterized protein [Source:UniProtKB/TrEMBL;Acc:C0P3G0]	RmlC-like cupins superfamily protein [Source:TAIR;Acc:AT3G04300]
GRMZM2G162739	nactf5	GRMZM2G038598	---	0.415231	---	Uncharacterized protein [Source:UniProtKB/TrEMBL;Acc:C0HEU5]	UDP-glucose 4-epimerase 5 [Source:UniProtKB/Swiss-Prot;Acc:Q9SN58]
GRMZM2G162739	nactf5	GRMZM2G084717	---	0.415223	---	---	---
GRMZM2G162739	nactf5	GRMZM2G148200	---	0.405899	---	---	---
GRMZM2G162739	nactf5	GRMZM2G038982	---	0.405445	---		Serine/threonine-protein kinase EDR1 [Source:UniProtKB/Swiss-Prot;Acc:Q9FPR3]
GRMZM2G162739	nactf5	GRMZM2G118409	---	0.402313	-1	MAC/Perforin domain containing protein; Uncharacterized protein [Source:UniProtKB/TrEMBL;Acc:C0PEL1]	MACPF domain-containing protein CAD1 [Source:UniProtKB/Swiss-Prot;Acc:Q9C7N2]
GRMZM2G162739	nactf5	GRMZM2G428216	umc2233	0.402215	---	---	---
GRMZM2G162739	nactf5	GRMZM2G055802	---	0.400363	-1	---	---
GRMZM2G162739	nactf5	GRMZM2G092154	---	0.395351	1	---	---
GRMZM2G162739	nactf5	GRMZM2G173536	---	0.394133	---	Uncharacterized protein [Source:UniProtKB/TrEMBL;Acc:C0P676]	SNF1-related protein kinase regulatory subunit gamma-1 [Source:UniProtKB/Swiss-Prot;Acc:Q8LBB2]
GRMZM2G162739	nactf5	GRMZM2G307992	---	0.390963	---	Thioredoxin superfamily protein [Source:Projected from Arabidopsis thaliana (AT1G07080) TAIR;Acc:AT1G07080]	Thioredoxin superfamily protein [Source:TAIR;Acc:AT1G07080]
GRMZM2G162739	nactf5	GRMZM2G043992	---	0.387694	---	---	---
GRMZM2G162739	nactf5	GRMZM2G041175	---	0.384571	---	Senescence-associated protein DH; Uncharacterized protein [Source:UniProtKB/TrEMBL;Acc:Q5UCF4]	Tetraspanin-7 [Source:UniProtKB/Swiss-Prot;Acc:Q9SUD4]
GRMZM2G162739	nactf5	GRMZM2G166639	acco15	0.383216	---	Acc oxidase [Source:UniProtKB/TrEMBL;Acc:K7U1L9]	1-aminocyclopropane-1-carboxylate oxidase 5 [Source:UniProtKB/Swiss-Prot;Acc:Q0WPW4]
GRMZM2G162739	nactf5	GRMZM2G080375	---	0.382847	---	Uncharacterized protein [Source:UniProtKB/TrEMBL;Acc:K7UQZ2]	ATP-dependent 6-phosphofructokinase 3 [Source:UniProtKB/Swiss-Prot;Acc:Q94AA4]
GRMZM2G162739	nactf5	GRMZM2G076844	---	0.37615	-1	---	---
GRMZM2G162739	nactf5	GRMZM2G057113	---	0.374799	---	Uncharacterized protein [Source:UniProtKB/TrEMBL;Acc:C0PFW2]	S-adenosyl-L-methionine-dependent methyltransferases superfamily protein [Source:TAIR;Acc:AT2G43320]
GRMZM2G162739	nactf5	AC235547.1_FG005	---	0.37468	---	Uncharacterized protein [Source:UniProtKB/TrEMBL;Acc:C4J3G3]	Leucine-rich repeat protein kinase family protein [Source:TAIR;Acc:AT4G39270]
GRMZM2G162739	nactf5	GRMZM2G134234	---	0.362466	---	Uncharacterized protein [Source:UniProtKB/TrEMBL;Acc:B4G170]	Protein of unknown function (DUF1644) [Source:TAIR;Acc:AT1G15430]
GRMZM2G162739	nactf5	GRMZM2G178886	---	0.358104	---	Grx_I1-glutaredoxin subgroup III [Source:UniProtKB/TrEMBL;Acc:K7W064]	Monothiol glutaredoxin-S13 [Source:UniProtKB/Swiss-Prot;Acc:Q84TF4]
GRMZM2G162739	nactf5	GRMZM2G420715	---	0.355382	---	---	---
GRMZM2G162739	nactf5	GRMZM2G471269	---	0.35117	---	Uncharacterized protein [Source:UniProtKB/TrEMBL;Acc:B4FRC3]	Serine carboxypeptidase-like 2 [Source:UniProtKB/Swiss-Prot;Acc:Q9CAU3]
GRMZM2G162739	nactf5	GRMZM2G065970	---	0.33126	---	---	---
GRMZM2G162739	nactf5	GRMZM2G083716	---	0.320485	---	Putative TCP-1/cpn60 chaperonin family protein isoform 1; Putative TCP-1/cpn60 chaperonin family protein isoform 2; Putative TCP-1/cpn60 chaperonin family protein isoform 3; Uncharacterized protein [Source:UniProtKB/TrEMBL;Acc:C0P530]	Chaperonin 60 subunit beta 3, chloroplastic [Source:UniProtKB/Swiss-Prot;Acc:C0Z361]
GRMZM2G162739	nactf5	GRMZM2G028086	---	0.307242	---	Putative calcium-dependent protein kinase family protein [Source:UniProtKB/TrEMBL;Acc:K7UGX6]	Calcium-dependent protein kinase 14 [Source:UniProtKB/Swiss-Prot;Acc:P93759]
GRMZM2G162739	nactf5	GRMZM2G420108	---	0.293735	---	---	---
GRMZM2G162739	nactf5	GRMZM2G436429	---	0.283485	---	Membrin 11; Uncharacterized protein [Source:UniProtKB/TrEMBL;Acc:B6TMP4]	Membrin-12 [Source:UniProtKB/Swiss-Prot;Acc:Q9FK28]
GRMZM2G162739	nactf5	GRMZM2G077299	---	0.282416	---	Putative alpha-L-arabinofuranosidase family protein [Source:UniProtKB/TrEMBL;Acc:K7U6T4]	Alpha-L-arabinofuranosidase 1 [Source:UniProtKB/Swiss-Prot;Acc:Q9SG80]
GRMZM2G162739	nactf5	GRMZM2G162127	---	0.264846	---	---	---
GRMZM2G162739	nactf5	GRMZM2G165926	---	0.256885	---	Uncharacterized protein [Source:UniProtKB/TrEMBL;Acc:B4FRU4]	26S proteasome non-ATPase regulatory subunit 4 homolog [Source:UniProtKB/Swiss-Prot;Acc:P55034]
GRMZM2G162739	nactf5	GRMZM2G134023	---	0.234738	---	---	---
GRMZM2G162739	nactf5	GRMZM2G057509	---	0.229243	---	---	---
GRMZM2G162739	nactf5	GRMZM2G074017	---	0.212499	---	---	---
GRMZM2G162739	nactf5	GRMZM2G157115	---	0.205013	---	Uncharacterized protein [Source:UniProtKB/TrEMBL;Acc:C0P878]	Protein kinase superfamily protein [Source:TAIR;Acc:AT2G07180]
GRMZM2G162739	nactf5	GRMZM2G161302	---	0.19721	---	Protein of unknown function (DUF1664) [Source:Projected from Arabidopsis thaliana (AT1G04960) TAIR;Acc:AT1G04960]	Protein of unknown function (DUF1664) [Source:TAIR;Acc:AT1G04960]
GRMZM2G162739	nactf5	GRMZM2G302601	---	0.180445	---	---	---
GRMZM2G162739	nactf5	GRMZM2G119339	---	0.174021	---	Uncharacterized protein [Source:UniProtKB/TrEMBL;Acc:B4FGE9]	Probable mediator of RNA polymerase II transcription subunit 19b [Source:UniProtKB/Swiss-Prot;Acc:Q6NQD9]
GRMZM2G162739	nactf5	GRMZM2G086841	---	0.166758	---	Uncharacterized protein [Source:UniProtKB/TrEMBL;Acc:C4IZP0]	Chaperone DnaJ-domain superfamily protein [Source:TAIR;Acc:AT1G72070]
GRMZM2G162739	nactf5	GRMZM2G458659	---	0.114445	---	Uncharacterized protein [Source:UniProtKB/TrEMBL;Acc:B4FA59]	NAD(P)-binding Rossmann-fold superfamily protein [Source:TAIR;Acc:AT1G01800]
GRMZM2G162739	nactf5	GRMZM2G124815	---	0.0967903	---	Uncharacterized protein [Source:UniProtKB/TrEMBL;Acc:K7UFC4]	HXXXD-type acyl-transferase family protein [Source:TAIR;Acc:AT5G07870]
GRMZM2G162739	nactf5	GRMZM2G056369	icl1	0.0872192	---	Isocitrate lyase [Source:UniProtKB/TrEMBL;Acc:B4FTF9]	Isocitrate lyase [Source:UniProtKB/Swiss-Prot;Acc:P28297]
GRMZM2G162739	nactf5	GRMZM2G107665	---	0.0821517	---	Aminomethyltransferase [Source:UniProtKB/TrEMBL;Acc:K7VSJ5]	Glycine cleavage T-protein family [Source:TAIR;Acc:AT4G12130]
GRMZM2G312201	nactf70	GRMZM2G456997	---	0.378136	---		CAP (Cysteine-rich secretory proteins, Antigen 5, and Pathogenesis-related 1 protein) superfamily protein [Source:TAIR;Acc:AT5G26130]
GRMZM2G312201	nactf70	GRMZM2G171254	---	0.361737	---	---	---
GRMZM2G312201	nactf70	GRMZM2G181551	---	0.289377	-1	Uncharacterized protein [Source:UniProtKB/TrEMBL;Acc:B4FDZ1]	Polyadenylate-binding protein-interacting protein 2 [Source:UniProtKB/Swiss-Prot;Acc:Q94AR4]
GRMZM2G312201	nactf70	GRMZM2G005849	gfa1	0.283696	---	---	---
GRMZM2G312201	nactf70	GRMZM2G328785	ptk1	0.278995	---	---	---
GRMZM2G312201	nactf70	GRMZM2G004548	platz11	0.278057	---	Uncharacterized protein [Source:UniProtKB/TrEMBL;Acc:C4JA06]	PLATZ transcription factor family protein [Source:TAIR;Acc:AT4G17900]
GRMZM2G312201	nactf70	GRMZM2G023081	---	0.275834	---	Cell number regulator 9 [Source:UniProtKB/Swiss-Prot;Acc:D9HP25]	Protein PLANT CADMIUM RESISTANCE 11 [Source:UniProtKB/Swiss-Prot;Acc:Q9SX24]
GRMZM2G312201	nactf70	GRMZM2G122072	---	0.272664	-1	Uncharacterized protein [Source:UniProtKB/TrEMBL;Acc:B4G1X4]	UDP-glycosyltransferase 88A1 [Source:UniProtKB/Swiss-Prot;Acc:Q9LK73]
GRMZM2G312201	nactf70	GRMZM2G074743	aox3	0.270546	---	Alternative oxidase [Source:UniProtKB/TrEMBL;Acc:Q8GT70]	Ubiquinol oxidase 2, mitochondrial [Source:UniProtKB/Swiss-Prot;Acc:O22049]
GRMZM2G312201	nactf70	GRMZM2G129450	---	0.269397	---	---	---
GRMZM2G312201	nactf70	GRMZM2G428216	umc2233	0.267956	---	---	---
GRMZM2G312201	nactf70	GRMZM2G052571	---	0.258878	---	---	---
GRMZM2G312201	nactf70	GRMZM2G055802	---	0.257843	-1	---	---
GRMZM2G312201	nactf70	GRMZM2G373554	---	0.240013	---	---	---
GRMZM2G312201	nactf70	GRMZM2G076844	---	0.23747	-1	---	---
GRMZM2G312201	nactf70	GRMZM2G065893	---	0.23674	---	Uncharacterized protein [Source:UniProtKB/TrEMBL;Acc:K7V2F6]	E3 ubiquitin-protein ligase RGLG1 [Source:UniProtKB/Swiss-Prot;Acc:Q9SS90]
GRMZM2G312201	nactf70	GRMZM2G088819	---	0.233026	---	---	---
GRMZM2G312201	nactf70	GRMZM2G146108	---	0.223936	---	---	---
GRMZM2G312201	nactf70	GRMZM2G043584	---	0.21112	---	---	---
GRMZM2G312201	nactf70	GRMZM5G801875	---	0.197118	---	Putative MATE efflux family protein; Transparent testa 12 protein [Source:UniProtKB/TrEMBL;Acc:B6TVF7]	MATE efflux family protein [Source:TAIR;Acc:AT4G00350]
GRMZM2G312201	nactf70	GRMZM2G010702	---	0.195129	---	---	---
GRMZM2G312201	nactf70	GRMZM2G317614	---	0.185792	---	Nucleotide binding protein [Source:UniProtKB/TrEMBL;Acc:B6SKI8]	Transducin/WD40 repeat-like superfamily protein [Source:TAIR;Acc:AT4G34380]
GRMZM2G312201	nactf70	GRMZM2G097641	spp2	0.157027	---	Sucrose-phosphatase 2 [Source:UniProtKB/Swiss-Prot;Acc:Q84ZX8]	Probable sucrose-phosphatase 1 [Source:UniProtKB/Swiss-Prot;Acc:Q9C8J4]
GRMZM2G312201	nactf70	GRMZM2G044306	---	0.0797936	---	RNA polymerase II large subunit family protein [Source:UniProtKB/TrEMBL;Acc:B6SMH6]	DNA-directed RNA polymerase II subunit 1 [Source:UniProtKB/Swiss-Prot;Acc:P18616]
